# Supplementary material for: Atroposelective construction of axially chiral enamides via N-allylic alkylation
Source: Royal Society of Chemistry journal article supplement (doi:10.1039/d2cc01000c), 2022-01-01
Supplement: d2cc01000c1.pdf [file d2cc01000c1.pdf]

## **Atroposelective Construction of Axially Chiral Enamides via *N*-Allylic Alkylation**

Qian-Yi Zhou,<sup>1</sup> Xin Li<sup>1, 2\*</sup>

<sup>1</sup>State key Laboratory of Elemento-Organic Chemistry, College of Chemistry,  
Nankai University, Tianjin 300071;

<sup>2</sup>Haihe Laboratory of Sustainable Chemical Transformations, Tianjin 300192  
China.

\*Corresponding Author(s): Xin Li: [xin\\_li@nankai.edu.cn](mailto:xin_li@nankai.edu.cn)

## Table of Contents

|                                                                                  |     |
|----------------------------------------------------------------------------------|-----|
| 1. General Information.....                                                      | 3   |
| 2. General Procedure for the Synthesis of Prochiral Enamides.....                | 4   |
| 3. Experimental Procedure for the Organocatalytic Reactions.....                 | 16  |
| 4. Large Scale Experiment.....                                                   | 33  |
| 5. Experimental Procedure for the Transformation of Axially Chiral Enamides..... | 33  |
| 6. The Racemization Experiments.....                                             | 36  |
| 7. X-Ray Crystallographic Data.....                                              | 46  |
| 8. NMR Spectra and HPLC Spectra of Products.....                                 | 48  |
| 9. References.....                                                               | 132 |

## 1. General Information

Unless otherwise noted, all commercial materials were purchased from Aladdin, Adamas and Energy Chemicals and used without further purification. TLC were performed on silica gel Huanghai HSGF254 plates and visualization of the developed chromatogram was performed by fluorescence quenching of UV fluorescence ( $\lambda = 254$  nm). Flash chromatography was performed using Silica gel (200-300 mesh) purchased from Qingdao Haiyang Chemical Co.  $^1\text{H}$  and  $^{13}\text{C}$  NMR were recorded on a Bruker-DPX 400 spectrometer. Chemical shifts are reported in ppm from tetramethylsilane (TMS) with the solvent resonance as the internal standard. The following abbreviations were used to designate chemical shift multiplicities: s = singlet, d = doublet, t = triplet, q = quartet, dd = doublet of doublets, m = multiplet, br = broad. All first-order splitting patterns were assigned on the basis of the appearance of the multiplet. Splitting patterns that could not be easily interpreted are designated as multiplet (m) or broad (br).  $^{19}\text{F}$  NMR were recorded on a Varian NMR 400 spectrometer. Mass spectra were obtained using electrospray ionization (ESI) mass spectrometer.

## 2. General Procedure for the Synthesis of Prochiral Enamides

### General procedure I

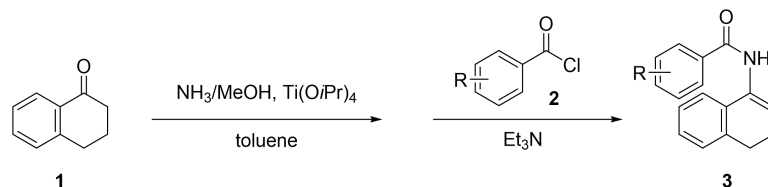

To a dry round bottom flask equipped with a football shaped magnetic stir bar was charged tetralone (10 mmol, 1.0 equiv) and toluene (6 mL). The flask was sealed with a rubber septum and a nitrogen inlet needle was inserted in the septum. The resultant solution was stirred and cooled in an ice/water bath. To the resultant cold stirring solution was added 7N  $\text{NH}_3$  in MeOH (15.0 mmol, 1.5 equiv) followed by dropwise addition of  $\text{Ti}(\text{O}i\text{-Pr})_4$  (20.0 mmol, 2.0 equiv). After 10 min, the ice/water cooling bath was removed, and the solution was stirred at rt for 18-24 h. After that the reaction mixture was then cooled in an ice/water bath ( $\sim 5^\circ\text{C}$ ) and treated with  $\text{Et}_3\text{N}$  (40.0 mmol, 4.0 equiv) followed by acyl chloride (20.0 mmol, 2.0 equiv). The cooling bath was then removed and the solution was stirred at rt for 1-3 h. The reaction mixture was extracted with DCM and evaporated *in vacuo*. The desired product was obtained by flash column chromatography on silica gel with hexane/ $\text{EtOAc}$  as the eluent.<sup>1</sup>

### General procedure II

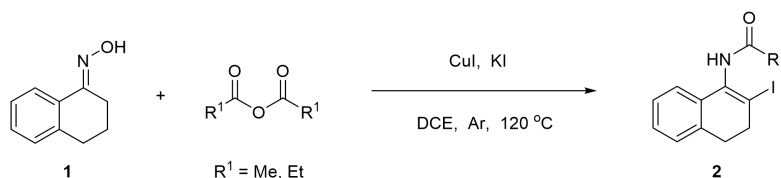

In a round-bottomed flask, ketoximes (10 mmol, 1.0 equiv), acid anhydride (25 mmol, 2.5 equiv),  $\text{KI}$  (12 mmol, 1.2 equiv), and  $\text{CuI}$  (1 mmol, 10 mol%) were stirred in 1,2-dichloroethane at  $120^\circ\text{C}$  under an argon atmosphere. After completion of the reaction (detected by TLC), the reaction mixture was cooled to room temperature, extracted with ethyl acetate, and washed with brine. The organic layer was dried over anhydrous  $\text{Na}_2\text{SO}_4$  and evaporated *in vacuo*. The desired iodoenamamide was obtained by flash column chromatography on silica gel with hexane/ $\text{EtOAc}$  as the eluent.<sup>2</sup>

### General procedure III

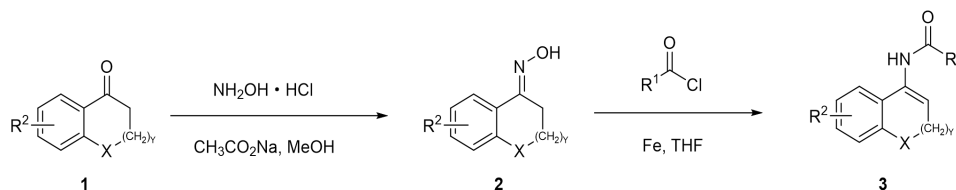

To a solution of ketone **1** (10 mmol, 1.0 equiv) in MeOH (25 ml) was added hydroxylamine hydrochloride (12 mmol, 1.2 equiv) and sodium acetate (12 mmol, 1.2 equiv) and this solution was



heated at 65 °C for 2 h. After this time, the solution was allowed to cool and water and EtOAc were added. The layers were separated and the aqueous layer extracted with further EtOAc. The combined organics were washed with brine, dried (Na<sub>2</sub>SO<sub>4</sub>) and evaporated *in vacuo*. This crude residue was directly dissolved in THF (50 ml) and iron powder (50.0 mmol, 5.0 equiv) and benzoyl chloride (80 mmol, 8.0 equiv) were added. The reaction was stirred at rt for overnight before addition of saturated NaHCO<sub>3</sub> solution. This was extracted twice with ethyl acetate and the organic layer was washed with brine, dried (Na<sub>2</sub>SO<sub>4</sub>) and evaporated *in vacuo*. The crude residue was purified by flash column chromatography to give the product **3**.<sup>3,4</sup>

### General procedure IV

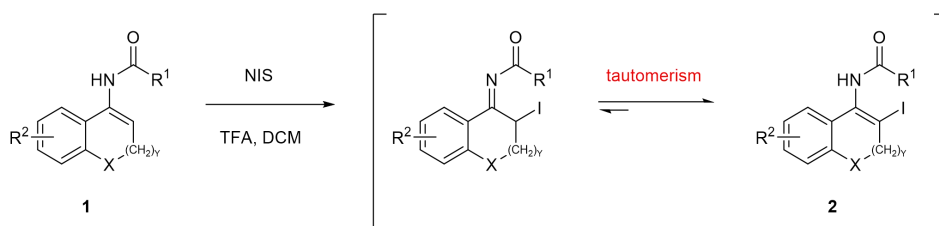

Compound **1** (1.0 equiv) was added to a solution of NIS (1.2 equiv) in 2% TFA in CH<sub>2</sub>Cl<sub>2</sub> and stirred at room temperature for overnight. The mixture was cooled in an ice bath to stir for a further hour before triethylamine was added slowly. The mixture was concentrated and taken up in CH<sub>2</sub>Cl<sub>2</sub>, washed with 1 M KHSO<sub>4</sub>, water and brine before concentrating and running down a column of silica to obtain the target product **2**.

### General procedure V

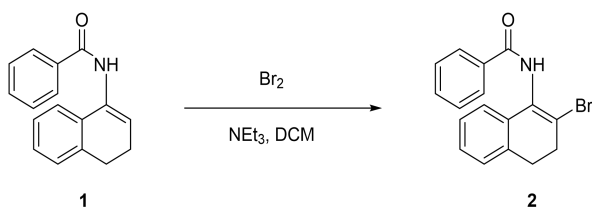

To a solution of N-(3,4-dihydronaphthalen-1-yl)benzamide (1.0 equiv) in CH<sub>2</sub>Cl<sub>2</sub> was added dropwise bromine (1.1 equiv) at 0 °C. The reaction mixture was stirred for 5 min at 0 °C, subsequently triethylamine (2.2 equiv) was added and stirred for 5 min at 0 °C. The resulting mixture was extracted with EtOAc, and washed with saturated NaHSO<sub>3</sub> solution. The combined organic layer was dried (Na<sub>2</sub>SO<sub>4</sub>) and concentrated *in vacuo*. The crude residue was purified by flash column chromatography to give the target compound.<sup>5</sup>

### General procedure VI

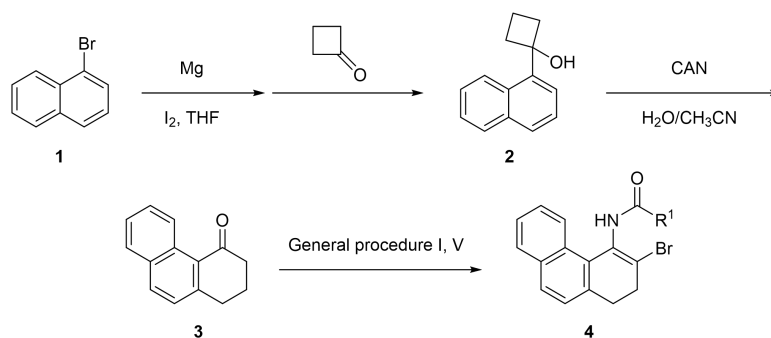

To a two-neck round bottom flask was added crushed magnesium (1.65 equiv), a small crystal of  $I_2$  and THF. While stirring, the appropriate aryl bromide (1.5 equiv) was added via a syringe. After introduced aryl bromide, the mixture was heated to reflux in an oil bath under argon atmosphere for 1 hour and cooled down until room temperature. Cyclobutanone (1.0 equiv) dissolved in THF was added dropwise to the Grignard solution under argon at 0 °C, and the reaction mixture was stirred for overnight at room temperature. When cyclobutanone were completely consumed, the mixture was quenched with  $NH_4Cl$  (aq.). The aqueous layer was extracted with ethyl acetate. The combined organic layers were dried over anhydrous  $Na_2SO_4$ , filtered and concentrated under reduced pressure. After removal of the solvent *in vacuo*, the crude material was purified by flash column chromatography on silica gel to give the desired product **2**. A solution of 1-(naphthalen-1-yl) cyclobutan-1-ol (1.0 equiv) in a water–acetonitrile mixture was stirred in an open reactor at 0 °C for 60 s. Subsequently, CAN was added and the mixture was stirred at 0 °C for 60 s. Then, saturated sodium thiosulfate was added to quench the reaction. Followed, the reaction mixture was extracted with ethyl acetate. Afterwards, the combined organic phase was dried with sodium sulphate anhydrous, and the solvent was evaporated *in vacuo*. The residue was purified by flash column chromatography on silica gel to yield the pure product **3**. The desired compound **4** was acquired from 2,3-dihydrophenanthren-4(1H)-one through general procedure I and V.<sup>6</sup>

## General procedure VII

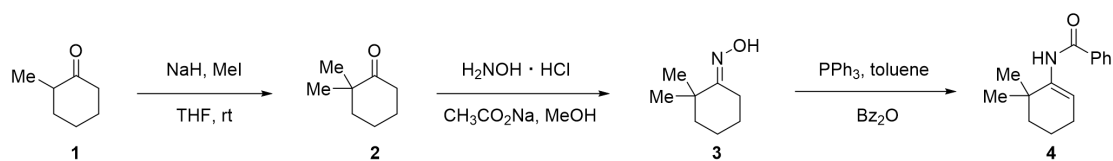

A flame-dried two-neck round-bottom flask equipped with stir bar and reflux condenser was charged with NaH (1.1 equiv) and THF under Ar. 2-methylcyclohexan-1-one (1.0 equiv) was added and the reaction mixture was refluxed for 1.5 h. HMDS (0.15 equiv) was added and the solution was refluxed for another 15 min. The reaction mixture was cooled to 0 °C and MeI (1.1 equiv) was added dropwise. After addition was complete, the reaction mixture was allowed to reach room temperature and then it was stirred for 3 h. The reaction mixture was evaporated at 20 °C to remove the solvent. Then to the residue added hydroxylamine hydrochloride, sodium acetate and methanol directly. The reaction mixture was refluxed for about three hours to afford the desired product **3** by flash column chromatography on silica gel. The solution of the above oxime (1.0 equiv) in toluene was purged with  $N_2$  for 30 min.  $PPh_3$  (1.2 equiv) in toluene was charged at room temperature. After stirring for 10 min, benzoic anhydride (1.2 equiv) was added and the reaction heated to reflux. After 16 h, the reaction mixture was cooled to room temperature and concentrated *in vacuo*. The residue was mixed with

methanol and excess  $K_2CO_3$ . After 1 h, methanol was removed in vacuo. The residue was dissolved in EtOAc and washed with brine, concentrated and purified with flash column to afford the target white solid **4**.<sup>7,8</sup>

### General procedure VIII

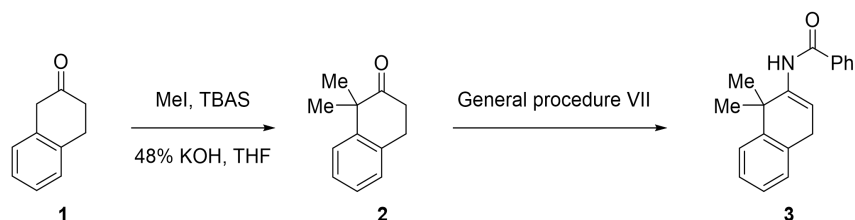

To the mixture of  $\beta$ -tetralone (1.0 equiv), TBAS (0.16 equiv) and methyl iodide (3.0 equiv) in THF was rapidly added 50% KOH solution in  $H_2O$ . The reaction mixture became warm and turned blue. The reaction mixture was stirred for 30 min during which time the color changed from blue to green and finally light brown. The reaction mixture was poured into water and extracted with EtOAc. The combined organic layer was washed with sat.  $NH_4Cl$  (aq.), dried over anhydrous  $MgSO_4$ , filtered and evaporated to give a crude oil. The oil was purified by column chromatography using hexane and ethyl acetate as eluent to give compound **2** as a white solid. The desired product **3** was acquired from 1,1-dimethyl-3,4-dihydronaphthalen-2(1*H*)-one through general procedure VII.<sup>9</sup>

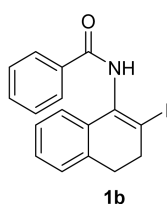

#### *N*-(2-iodo-3,4-dihydronaphthalen-1-yl)benzamide (**1b**)

According to the general procedure III and IV, **1b** was obtained as a white solid.

$^1H$  NMR (400 MHz,  $CDCl_3$ )  $\delta$  8.05 – 7.89 (m, 2H), 7.60 (t,  $J = 7.3$  Hz, 1H), 7.52 (dd,  $J = 8.3, 6.7$  Hz, 2H), 7.37 (s, 1H), 7.24 – 7.09 (m, 4H), 3.07 – 2.87 (m,  $J = 4.4$  Hz, 4H).

$^{13}C$  NMR (101 MHz,  $CDCl_3$ )  $\delta$  165.7, 136.9, 135.0, 133.8, 132.2, 130.8, 128.8, 128.1, 127.6, 127.4, 126.6, 123.3, 98.0, 37.9, 29.6.

HRMS (ESI) calcd for  $[C_{17}H_{15}INO]^+$ ,  $m/z$ : 376.0193, found: 376.0198.

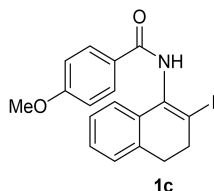

#### *N*-(2-iodo-3,4-dihydronaphthalen-1-yl)-4-methoxybenzamide (**1c**)

According to the general procedure III and IV, **1c** was obtained as a white solid.

$^1H$  NMR (400 MHz,  $CDCl_3$ )  $\delta$  7.96 (d,  $J = 8.4$  Hz, 2H), 7.32 (s, 1H), 7.25 – 7.13 (m, 4H), 7.02 (d,  $J = 8.4$  Hz, 2H), 3.91 (s, 3H), 3.00 (q,  $J = 4.6$  Hz, 4H).

$^{13}C$  NMR (101 MHz,  $CDCl_3$ )  $\delta$  165.2, 162.8, 137.1, 135.0, 130.9, 129.4, 128.0, 127.5, 126.6, 126.0, 123.4, 114.0, 97.6, 55.5, 37.9, 29.6.

**HRMS (ESI)** calcd for  $[C_{18}H_{17}INO_2]^+$ ,  $m/z$ : 406.0298, found: 406.0306.

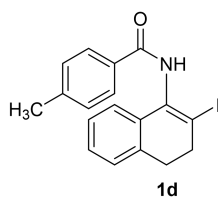

***N*-(2-iodo-3,4-dihydronaphthalen-1-yl)-4-methylbenzamide (1d)**

According to the general procedure III and IV, **1d** was obtained as a white solid.

**$^1H$  NMR (400 MHz,  $CDCl_3$ )**  $\delta$  7.89 (d,  $J = 7.9$  Hz, 2H), 7.38 (s, 1H), 7.33 (d,  $J = 7.8$  Hz, 2H), 7.25 – 7.12 (m, 4H), 3.09 – 2.92 (m, 4H), 2.47 (s, 3H).

**$^{13}C$  NMR (101 MHz,  $CDCl_3$ )**  $\delta$  165.6, 142.7, 137.0, 135.0, 131.0, 130.8, 129.5, 128.0, 127.5, 127.5, 126.6, 123.4, 97.8, 37.9, 29.6, 21.6.

**HRMS (ESI)** calcd for  $[C_{18}H_{17}INO]^+$ ,  $m/z$ : 390.0349, found: 390.0358.

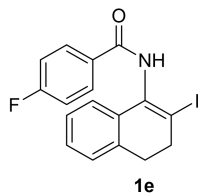

**4-fluoro-*N*-(2-iodo-3,4-dihydronaphthalen-1-yl)benzamide (1e)**

According to the general procedure III and IV, **1e** was obtained as a white solid.

**$^1H$  NMR (400 MHz,  $CDCl_3$ )**  $\delta$  7.96 (dd,  $J = 8.4, 5.2$  Hz, 2H), 7.37 (s, 1H), 7.22 – 7.13 (m, 6H), 3.08 – 2.85 (m, 4H).

**$^{13}C$  NMR (101 MHz,  $CDCl_3$ )**  $\delta$  164.7, 163.9, 136.8, 135.0, 130.7, 129.9 (d,  $J = 9.2$  Hz), 128.2, 127.6, 126.7, 123.2, 115.9 (d,  $J = 22.0$  Hz), 98.3, 37.9, 29.5.

**$^{19}F$  NMR (376 MHz,  $CDCl_3$ )**  $\delta$  -106.96.

**HRMS (ESI)** calcd for  $[C_{17}H_{14}FINO]^+$ ,  $m/z$ : 394.0099, found: 394.0107.

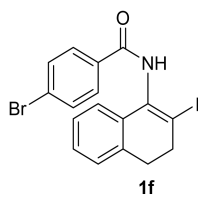

**4-bromo-*N*-(2-iodo-3,4-dihydronaphthalen-1-yl)benzamide (1f)**

According to the general procedure III and IV, **1f** was obtained as a white solid.

**$^1H$  NMR (400 MHz,  $CDCl_3$ )**  $\delta$  7.85 (d,  $J = 8.1$  Hz, 2H), 7.67 (t,  $J = 6.7$  Hz, 2H), 7.37 (s, 1H), 7.25 – 7.16 (m, 4H), 3.21 – 2.90 (m, 4H).

**$^{13}C$  NMR (101 MHz,  $CDCl_3$ )**  $\delta$  164.8, 136.7, 135.0, 132.6, 132.1, 131.9, 130.6, 129.0, 128.2, 127.6, 126.7, 123.2, 98.3, 37.9, 29.5.

**HRMS (ESI)** calcd for  $[C_{17}H_{14}BrINO]^+$ ,  $m/z$ : 453.9298, found: 453.9299.

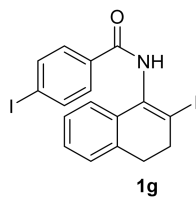

**4-iodo-*N*-(2-iodo-3,4-dihydronaphthalen-1-yl)benzamide (1g)**

According to the general procedure III and IV, **1g** was obtained as a white solid.

**<sup>1</sup>H NMR (400 MHz, DMSO-*d*<sub>6</sub>)** δ 9.93 (s, 1H), 7.94 (d, *J* = 8.1 Hz, 2H), 7.79 (d, *J* = 8.1 Hz, 2H), 7.26 – 7.13 (m, 3H), 7.09 (d, *J* = 7.5 Hz, 1H), 2.96 (d, *J* = 7.6 Hz, 2H), 2.90 (d, *J* = 7.7 Hz, 2H).

**<sup>13</sup>C NMR (101 MHz, DMSO-*d*<sub>6</sub>)** δ 164.8, 137.8, 137.4, 135.3, 133.9, 132.3, 130.0, 128.3, 127.9, 127.0, 123.3, 101.7, 99.9, 37.9, 29.3.

**HRMS (ESI)** calcd for [C<sub>17</sub>H<sub>13</sub>I<sub>2</sub>NNaO]<sup>+</sup>, *m/z*: 523.8979, found: 523.8986.

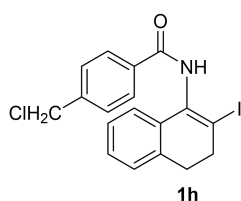

**4-(chloromethyl)-*N*-(2-iodo-3,4-dihydronaphthalen-1-yl)benzamide (1h)**

According to the general procedure I and IV, **1h** was obtained as a white solid.

**<sup>1</sup>H NMR (400 MHz, CDCl<sub>3</sub>)** δ 8.03 (d, *J* = 6.1 Hz, 2H), 7.68 – 7.54 (m, 2H), 7.49 (s, 1H), 7.24 (s, 4H), 4.72 (s, 2H), 3.05 (s, 4H).

**<sup>13</sup>C NMR (101 MHz, CDCl<sub>3</sub>)** δ 165.1, 141.5, 136.8, 135.0, 133.8, 130.7, 128.9, 128.1, 127.9, 127.6, 126.7, 123.3, 98.3, 45.4, 37.9, 29.5.

**HRMS (ESI)** calcd for [C<sub>18</sub>H<sub>16</sub>ClINO]<sup>+</sup>, *m/z*: 423.9960, found: 423.9966.

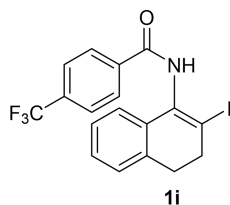

***N*-(2-iodo-3,4-dihydronaphthalen-1-yl)-4-(trifluoromethyl)benzamide (1i)**

According to the general procedure III and IV, **1i** was obtained as a white solid.

**<sup>1</sup>H NMR (400 MHz, CDCl<sub>3</sub>)** δ 8.09 (d, *J* = 7.9 Hz, 2H), 7.77 (d, *J* = 8.0 Hz, 2H), 7.49 (s, 1H), 7.26 – 6.89 (m, 4H), 3.20 – 2.81 (m, 4H).

**<sup>13</sup>C NMR (101 MHz, CDCl<sub>3</sub>)** δ 164.5, 137.1, 136.6, 135.0, 130.6, 128.3, 127.9, 127.7, 126.7, 125.9 (q, *J* = 3.5 Hz), 123.1, 98.8, 37.9, 29.5.

**<sup>19</sup>F NMR (376 MHz, CDCl<sub>3</sub>)** δ -62.97.

**HRMS (ESI)** calcd for [C<sub>18</sub>H<sub>14</sub>F<sub>3</sub>INO]<sup>+</sup>, *m/z*: 444.0067, found: 444.0077.

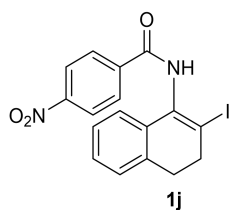

***N*-(2-iodo-3,4-dihydronaphthalen-1-yl)-4-nitrobenzamide (1j)**

According to the general procedure I and IV, **1j** was obtained as a white solid.

**<sup>1</sup>H NMR (400 MHz, CDCl<sub>3</sub>)** δ 8.33 (d, *J* = 8.4 Hz, 2H), 8.11 (d, *J* = 8.3 Hz, 2H), 7.48 (s, 1H), 7.25 – 7.09 (m, 4H), 3.04 – 2.94 (m, 4H).

**<sup>13</sup>C NMR (101 MHz, CDCl<sub>3</sub>)** δ 163.8, 150.0, 139.3, 136.4, 135.0, 130.4, 128.6, 128.4, 127.8, 126.7, 124.0, 123.0, 99.1, 37.9, 29.5.

**HRMS (ESI)** calcd for [C<sub>17</sub>H<sub>14</sub>IN<sub>2</sub>O<sub>3</sub>]<sup>+</sup>, *m/z*: 421.0044, found: 421.0045.

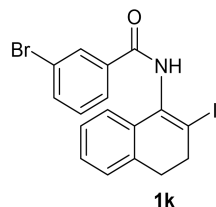

**3-bromo-*N*-(2-iodo-3,4-dihydronaphthalen-1-yl)benzamide (1k)**

According to the general procedure III and IV, **1k** was obtained as a white solid.

**<sup>1</sup>H NMR (400 MHz, CDCl<sub>3</sub>)** δ 8.19 (s, 1H), 7.97 (d, *J* = 7.9 Hz, 1H), 7.80 (d, *J* = 8.0 Hz, 1H), 7.46 (dd, *J* = 17.7, 9.8 Hz, 2H), 7.31 – 7.22 (m, 4H), 3.12 – 3.02 (m, 4H).

**<sup>13</sup>C NMR (101 MHz, CDCl<sub>3</sub>)** δ 164.3, 136.6, 135.8, 135.1, 135.0, 130.7, 130.6, 130.4, 128.2, 127.6, 126.7, 125.9, 123.2, 123.0, 98.6, 37.9, 29.5.

**HRMS (ESI)** calcd for [C<sub>17</sub>H<sub>14</sub>BrINO]<sup>+</sup>, *m/z*: 453.9298, found: 453.9306.

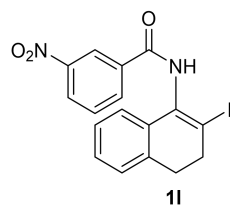

***N*-(2-iodo-3,4-dihydronaphthalen-1-yl)-3-nitrobenzamide (1l)**

According to the general procedure III and IV, **1l** was obtained as a white solid.

**<sup>1</sup>H NMR (400 MHz, CDCl<sub>3</sub>)** δ 8.82 (s, 1H), 8.46 (d, *J* = 8.6 Hz, 1H), 8.33 (d, *J* = 7.7 Hz, 1H), 7.74 (t, *J* = 7.9 Hz, 1H), 7.51 (s, 1H), 7.27 – 7.08 (m, 4H), 3.06 – 2.96 (m, 4H).

**<sup>13</sup>C NMR (101 MHz, CDCl<sub>3</sub>)** δ 163.4, 148.4, 136.4, 135.0, 133.5, 130.5, 130.2, 128.4, 127.7, 126.7, 126.7, 123.0, 122.3, 99.1, 37.9, 29.5.

**HRMS (ESI)** calcd for [C<sub>17</sub>H<sub>14</sub>IN<sub>2</sub>O<sub>3</sub>]<sup>+</sup>, *m/z*: 421.0044, found: 421.0046.

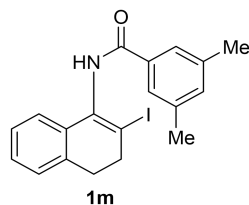

***N*-(2-iodo-3,4-dihydronaphthalen-1-yl)-3,5-dimethylbenzamide (1m)**

According to the general procedure I and IV, **1m** was obtained as a white solid.

**<sup>1</sup>H NMR (400 MHz, CDCl<sub>3</sub>)** δ 7.55 (s, 2H), 7.30 (s, 1H), 7.22 – 7.08 (m, 5H), 3.11 – 2.78 (m, *J* = 4.4 Hz, 4H), 2.39 (s, 6H).

**<sup>13</sup>C NMR (101 MHz, CDCl<sub>3</sub>)** δ 166.0, 138.6, 137.0, 135.0, 133.8, 133.8, 130.8, 128.0, 127.5, 126.6, 125.2, 123.4, 98.0, 37.9, 29.6, 21.3.

**HRMS (ESI)** calcd for [C<sub>19</sub>H<sub>18</sub>INNaO]<sup>+</sup>, *m/z*: 426.0325, found: 426.0325.

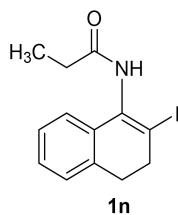

***N*-(2-iodo-3,4-dihydronaphthalen-1-yl) propionamide (1n)**

According to the general procedure II, **1n** was obtained as a white solid.

<sup>1</sup>H NMR (400 MHz, CDCl<sub>3</sub>) δ 7.25 – 7.04 (m, 4H), 6.68 (s, 1H), 3.04 – 2.86 (m, 4H), 2.45 (q, *J* = 7.2 Hz, 2H), 1.30 (t, *J* = 7.4 Hz, 3H).

<sup>13</sup>C NMR (101 MHz, CDCl<sub>3</sub>) δ 172.3, 136.8, 135.0, 130.9, 128.0, 127.5, 126.6, 123.2, 98.2, 37.9, 30.0, 29.5, 9.9.

HRMS (ESI) calcd for [C<sub>13</sub>H<sub>14</sub>INNaO]<sup>+</sup>, *m/z*: 350.0012, found: 350.0017.

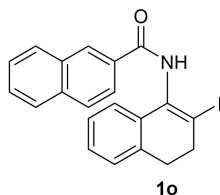

***N*-(2-iodo-3,4-dihydronaphthalen-1-yl)-2-naphthamide (1o)**

According to the general procedure I and IV, **1o** was obtained as a white solid.

<sup>1</sup>H NMR (400 MHz, CDCl<sub>3</sub>) δ 8.49 (s, 1H), 8.04 – 7.84 (m, 4H), 7.57 (p, *J* = 6.8 Hz, 3H), 7.27 – 7.05 (m, 4H), 3.18 – 2.72 (m, *J* = 4.2 Hz, 4H).

<sup>13</sup>C NMR (101 MHz, CDCl<sub>3</sub>) δ 165.8, 137.0, 135.1, 135.0, 132.6, 131.0, 130.9, 129.1, 128.8, 128.1, 128.0, 127.8, 127.6, 126.9, 126.7, 123.8, 123.4, 98.2, 37.9, 29.6.

HRMS (ESI) calcd for [C<sub>21</sub>H<sub>16</sub>INNaO]<sup>+</sup>, *m/z*: 448.0169, found: 448.0186.

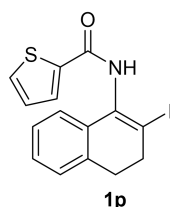

***N*-(2-iodo-3,4-dihydronaphthalen-1-yl)thiophene-2-carboxamide (1p)**

According to the general procedure III and IV, **1p** was obtained as a white solid.

<sup>1</sup>H NMR (400 MHz, CDCl<sub>3</sub>) δ 7.75 (d, *J* = 3.7 Hz, 1H), 7.59 (d, *J* = 5.0 Hz, 1H), 7.32 – 7.14 (m, 4H), 3.26 – 2.68 (m, 4H).

<sup>13</sup>C NMR (101 MHz, CDCl<sub>3</sub>) δ 160.1, 138.0, 136.6, 135.0, 131.0, 130.8, 129.4, 128.1, 127.9, 127.5, 126.7, 123.4, 98.2, 37.9, 29.5.

HRMS (ESI) calcd for [C<sub>15</sub>H<sub>12</sub>INNaOS]<sup>+</sup>, *m/z*: 403.9576, found: 403.9583.

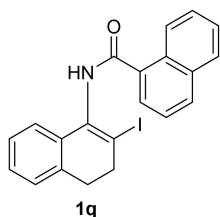

### ***N*-(2-iodo-3,4-dihydronaphthalen-1-yl)-2-naphthamide (1q)**

According to the general procedure I and IV, **1q** was obtained as a white solid.

**<sup>1</sup>H NMR (400 MHz, CDCl<sub>3</sub>)** δ 8.58 (d, *J* = 8.1 Hz, 1H), 8.00 (dd, *J* = 7.2, 4.0 Hz, 2H), 7.92 (d, *J* = 7.7 Hz, 1H), 7.67 – 7.51 (m, 3H), 7.43 – 7.34 (m, 1H), 7.32 – 7.15 (m, 4H), 3.02 (dt, *J* = 11.0, 5.5 Hz, 4H).

**<sup>13</sup>C NMR (101 MHz, CDCl<sub>3</sub>)** δ 167.6, 136.7, 135.1, 133.9, 133.4, 131.5, 131.0, 130.5, 128.4, 128.2, 127.7, 127.4, 126.8, 126.6, 125.8, 125.5, 124.7, 123.1, 99.2, 38.1, 29.6.

**HRMS (ESI)** calcd for [C<sub>21</sub>H<sub>16</sub>INNaO]<sup>+</sup>, *m/z*: 448.0169, found: 448.0184.

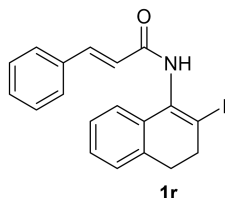

### ***N*-(2-iodo-3,4-dihydronaphthalen-1-yl)cinnamamide (1r)**

According to the general procedure III and IV, **1r** was obtained as a yellow solid.

**<sup>1</sup>H NMR (400 MHz, CDCl<sub>3</sub>)** δ 7.81 (d, *J* = 15.6 Hz, 1H), 7.61 (s, 2H), 7.46 (d, *J* = 4.6 Hz, 3H), 7.38 (s, 1H), 7.28 (s, 3H), 7.18 (s, 1H), 6.73 (d, *J* = 15.6 Hz, 1H), 3.07 – 2.94 (m, 4H).

**<sup>13</sup>C NMR (101 MHz, CDCl<sub>3</sub>)** δ 164.4, 163.9, 142.9, 136.9, 134.9, 134.6, 130.9, 130.0, 128.9, 128.1, 127.5, 126.6, 123.5, 119.8, 98.3, 37.9, 29.5.

**HRMS (ESI)** calcd for [C<sub>19</sub>H<sub>16</sub>INNaO]<sup>+</sup>, *m/z*: 424.0169, found: 424.0179.

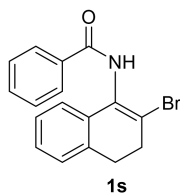

### ***N*-(2-bromo-3,4-dihydronaphthalen-1-yl)benzamide (1s)**

According to the general procedure III and V, **1s** was obtained as a white solid.

**<sup>1</sup>H NMR (400 MHz, CDCl<sub>3</sub>)** δ 8.04 – 7.89 (m, 2H), 7.65 – 7.39 (m, 4H), 7.26 – 7.06 (m, 4H), 3.04 – 2.99 (m, 2H), 2.93 – 2.89 (m, 2H).

**<sup>13</sup>C NMR (101 MHz, CDCl<sub>3</sub>)** δ 166.5, 136.9, 134.9, 131.8, 131.7, 128.8, 128.0, 127.7, 127.1, 126.6, 120.6, 119.8, 105.1, 27.7, 22.3.

**HRMS (ESI)** calcd for [C<sub>17</sub>H<sub>15</sub>BrNO]<sup>+</sup>, *m/z*: 328.0332, found: 328.0342.

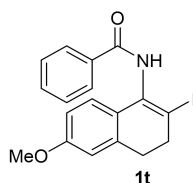

### ***N*-(2-iodo-6-methoxy-3,4-dihydronaphthalen-1-yl)benzamide (1t)**

According to procedure III and IV, **1t** was obtained as a white solid.

**<sup>1</sup>H NMR (400 MHz, CDCl<sub>3</sub>)** δ 7.95 (d, *J* = 7.5 Hz, 2H), 7.57 (t, *J* = 7.2 Hz, 1H), 7.49 (t, *J* = 7.5 Hz, 2H), 7.33 (s, 1H), 7.10 (d, *J* = 8.5 Hz, 1H), 6.75 – 6.56 (m, 2H), 3.77 (s, 3H), 2.97 – 2.89 (m, 4H).

**<sup>13</sup>C NMR (101 MHz, CDCl<sub>3</sub>)** δ 165.6, 159.4, 136.9, 136.6, 133.9, 132.1, 128.8, 127.4, 124.9, 124.0, 113.8, 111.2, 94.1, 55.3, 37.7, 30.0.

**HRMS (ESI)** calcd for [C<sub>18</sub>H<sub>17</sub>INO<sub>2</sub>]<sup>+</sup>, *m/z*: 406.0298, found: 406.0312.



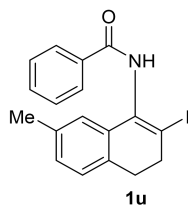

***N*-(2-iodo-7-methyl-3,4-dihydronaphthalen-1-yl)benzamide (1u)**

According to the general procedure I and IV, **1u** was obtained as a white solid.

**<sup>1</sup>H NMR (400 MHz, CDCl<sub>3</sub>)** δ 8.23 (d, *J* = 7.4 Hz, 2H), 7.89 – 7.71 (m, 3H), 7.62 (s, 1H), 7.33 – 7.16 (m, 3H), 3.19 (dq, *J* = 13.8, 6.8 Hz, 4H), 2.51 (s, 3H).

**<sup>13</sup>C NMR (101 MHz, CDCl<sub>3</sub>)** δ 165.7, 136.9, 136.1, 133.9, 132.2, 132.0, 130.7, 128.8, 128.8, 127.5, 123.9, 98.5, 38.2, 29.2, 21.3.

**HRMS (ESI)** calcd for [C<sub>18</sub>H<sub>16</sub>INNaO]<sup>+</sup>, *m/z*: 412.0169, found: 412.0171.

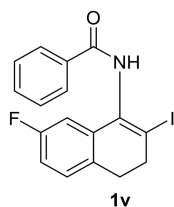

***N*-(7-fluoro-2-iodo-3,4-dihydronaphthalen-1-yl)benzamide (1v)**

According to the general procedure III and IV, **1v** was obtained as a white solid.

**<sup>1</sup>H NMR (400 MHz, CDCl<sub>3</sub>)** δ 7.96 (d, *J* = 7.6 Hz, 2H), 7.59 (t, *J* = 7.4 Hz, 1H), 7.51 (t, *J* = 7.7 Hz, 2H), 7.41 (s, 1H), 7.08 (t, *J* = 6.9 Hz, 1H), 6.89 (d, *J* = 10.5 Hz, 2H), 3.13 – 2.74 (m, 4H).

**<sup>13</sup>C NMR (101 MHz, CDCl<sub>3</sub>)** δ 165.8, 161.8 (d, *J* = 243.2 Hz), 136.4, 133.5, 132.3, 130.5 (d, *J* = 2.7 Hz), 128.9, 128.8 (d, *J* = 8.1 Hz), 127.6, 127.4, 114.5 (d, *J* = 21.5 Hz), 110.7 (d, *J* = 23.9 Hz), 99.9, 38.1, 28.8.

**<sup>19</sup>F NMR (376 MHz, CDCl<sub>3</sub>)** δ -115.95.

**HRMS (ESI)** calcd for [C<sub>17</sub>H<sub>13</sub>FINaO]<sup>+</sup>, *m/z*: 415.9918, found: 415.9926.

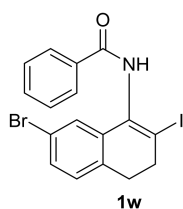

***N*-(7-bromo-2-iodo-3,4-dihydronaphthalen-1-yl)benzamide (1w)**

According to the general procedure III and IV, **1w** was obtained as a white solid.

**<sup>1</sup>H NMR (400 MHz, CDCl<sub>3</sub>)** δ 8.00 (d, *J* = 7.6 Hz, 2H), 7.63 (t, *J* = 7.4 Hz, 1H), 7.55 (t, *J* = 7.6 Hz, 2H), 7.40 (s, 1H), 7.33 (d, *J* = 6.9 Hz, 2H), 7.03 (d, *J* = 7.9 Hz, 1H), 3.01 (t, *J* = 7.9 Hz, 2H), 2.92 (t, *J* = 7.9 Hz, 2H).

**<sup>13</sup>C NMR (101 MHz, CDCl<sub>3</sub>)** δ 165.7, 136.0, 133.8, 133.5, 132.7, 132.3, 130.8, 129.1, 128.9, 127.5, 126.2, 120.4, 100.0, 37.8, 29.0.

**HRMS (ESI)** calcd for [C<sub>17</sub>H<sub>14</sub>BrINO]<sup>+</sup>, *m/z*: 453.9298, found: 453.9308.

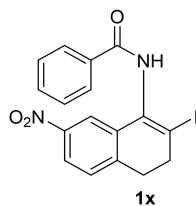

***N*-(2-iodo-7-nitro-3,4-dihydronaphthalen-1-yl)benzamide (1x)**

According to the general procedure III and IV, **1x** was obtained as a white solid.

**<sup>1</sup>H NMR (400 MHz, CDCl<sub>3</sub>)** δ 8.08 – 7.93 (m, 4H), 7.62 (t, *J* = 7.5 Hz, 1H), 7.54 (d, *J* = 7.4 Hz, 3H), 7.28 (s, 1H), 3.04 (s, 4H).

**<sup>13</sup>C NMR (101 MHz, CDCl<sub>3</sub>)** δ 165.9, 147.2, 142.2, 135.8, 133.2, 132.5, 132.0, 129.0, 128.4, 127.5, 122.8, 118.4, 100.4, 37.2, 29.5.

**HRMS (ESI)** calcd for [C<sub>17</sub>H<sub>13</sub>IN<sub>2</sub>NaO<sub>3</sub>]<sup>+</sup>, *m/z*: 442.9863, found: 442.9863.

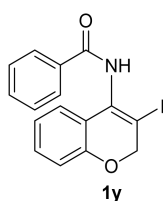

***N*-(3-iodo-2*H*-chromen-4-yl)benzamide (1y)**

According to procedure III and IV, **1y** was obtained as a white solid.

**<sup>1</sup>H NMR (400 MHz, CDCl<sub>3</sub>)** δ 7.95 (d, *J* = 7.6 Hz, 2H), 7.60 (t, *J* = 7.3 Hz, 1H), 7.52 (t, *J* = 7.6 Hz, 2H), 7.28 (s, 1H), 7.20 (td, *J* = 7.8, 1.6 Hz, 1H), 7.13 (dd, *J* = 7.7, 1.6 Hz, 1H), 6.97 – 6.79 (m, 2H), 5.04 (s, 2H).

**<sup>13</sup>C NMR (101 MHz, CDCl<sub>3</sub>)** δ 165.5, 153.9, 133.5, 132.4, 130.3, 129.5, 128.9, 128.3, 127.5, 123.6, 121.7, 116.3, 88.3, 74.1.

**HRMS (ESI)** calcd for [C<sub>16</sub>H<sub>13</sub>INO<sub>2</sub>]<sup>+</sup>, *m/z*: 377.9985, found: 377.9995.

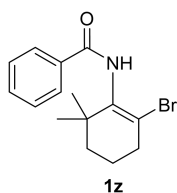

***N*-(2-bromo-6,6-dimethylcyclohex-1-en-1-yl)benzamide (1z)**

According to the general procedure VII and V, **1z** was obtained as a white solid.

**<sup>1</sup>H NMR (400 MHz, CDCl<sub>3</sub>)** δ 7.64 (d, *J* = 8.1 Hz, 2H), 7.35 – 7.28 (m, 1H), 7.24 (t, *J* = 7.6 Hz, 2H), 6.73 (s, 1H), 2.44 (t, *J* = 6.2 Hz, 2H), 1.59 (dt, *J* = 12.0, 5.9 Hz, 2H), 1.51 – 1.39 (m, 2H), 0.93 (s, 6H).

**<sup>13</sup>C NMR (101 MHz, CDCl<sub>3</sub>)** δ 165.8, 137.4, 134.7, 131.6, 128.6, 127.2, 123.5, 38.6, 38.0, 36.5, 27.2, 20.7.

**HRMS (ESI)** calcd for [C<sub>15</sub>H<sub>18</sub>BrNNaO]<sup>+</sup>, *m/z*: 330.0464, found: 330.0470.

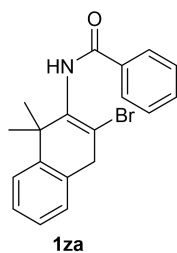

***N*-(3-bromo-1,1-dimethyl-1,4-dihydronaphthalen-2-yl)benzamide (1za)**

According to the general procedure VIII and V, **1za** was obtained as a yellow solid.

**<sup>1</sup>H NMR (400 MHz, CDCl<sub>3</sub>)** δ 7.93 – 7.85 (m, 2H), 7.56 – 7.50 (m, 1H), 7.46 (dd, *J* = 8.2, 6.6 Hz, 2H), 7.36 (dd, *J* = 7.9, 1.4 Hz, 1H), 7.26 – 7.21 (m, 1H), 7.17 (td, *J* = 7.4, 1.4 Hz, 1H), 7.12 – 7.01 (m, 2H), 4.02 (d, *J* = 2.0 Hz, 2H), 1.49 (s, 6H).

**<sup>13</sup>C NMR (101 MHz, CDCl<sub>3</sub>)** δ 166.2, 141.9, 135.7, 134.5, 131.9, 131.3, 128.7, 127.3, 127.3, 126.9, 126.4, 126.3, 120.6, 42.7, 40.1, 29.0.

**HRMS (ESI)** calcd for [C<sub>19</sub>H<sub>19</sub>BrNO]<sup>+</sup>, *m/z*: 356.0645, found: 356.0637.

### 3. Experimental Procedure for the Organocatalytic Reactions

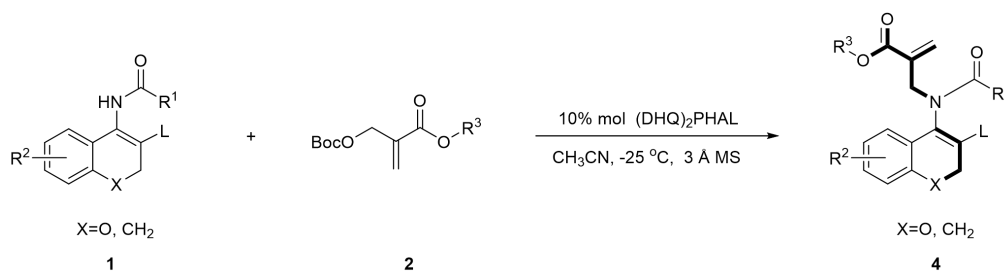

To a reaction tube equipped with a magnetic stir bar was added enamide **1** (0.10 mmol), catalyst **3g** (0.01 mmol) and 3 Å MS (40 mg). Then 1.0 mL of CH<sub>3</sub>CN was added. When the temperature of the mixture was decreased to -25 °C, achiral MBH carbonate **2** (0.30 mmol) was added and the reaction mixture was stirred at -25 °C. Upon the reaction completed, the resulting crude residue was purified directly *via* column chromatography on silica gel to afford the product.

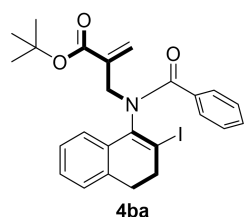

#### *tert*-butyl 2-((*N*-(2-iodo-3,4-dihydronaphthalen-1-yl)benzamido)methyl)acrylate (**4ba**)

According to the general procedure, **4ba** was obtained in 83% yield and 96.0:4.0 er as a white solid.

**Specific rotation**  $[\alpha]^{25}_{\text{D}} = +36.1$  ( $c = 0.5$ , CH<sub>2</sub>Cl<sub>2</sub>)

**<sup>1</sup>H NMR (400 MHz, CDCl<sub>3</sub>)**  $\delta$  7.43 (d,  $J = 7.3$  Hz, 2H), 7.24 – 7.11 (m, 4H), 7.07 (t,  $J = 7.7$  Hz, 2H), 7.00 (d,  $J = 8.0$  Hz, 1H), 6.30 (d,  $J = 1.7$  Hz, 1H), 6.07 (d,  $J = 1.7$  Hz, 1H), 4.59 (d,  $J = 14.4$  Hz, 1H), 4.47 (d,  $J = 14.4$  Hz, 1H), 2.81 – 2.69 (m, 2H), 2.67 – 2.57 (m, 1H), 2.53 – 2.42 (m, 1H), 1.31 (s, 9H).

**<sup>13</sup>C NMR (101 MHz, CDCl<sub>3</sub>)**  $\delta$  170.6, 165.5, 143.2, 136.7, 136.1, 135.9, 132.5, 130.4, 130.2, 128.3, 127.8, 127.7, 127.3, 127.0, 123.8, 102.5, 80.7, 47.2, 39.0, 29.0, 28.0.

**HRMS (ESI)** calcd for [C<sub>25</sub>H<sub>26</sub>INNaO<sub>3</sub>]<sup>+</sup>,  $m/z$ : 538.0850, found: 538.0861.

**HPLC analysis:** Daicel Chiralpak OD-H, hexane/isopropyl alcohol = 95/5, flow rate = 1.0 mL/min, UV = 210 nm,  $t_{\text{R}} = 8.2$  min (major),  $t_{\text{R}} = 11.7$  min (minor).

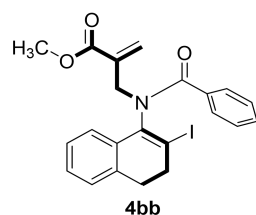

#### methyl 2-((*N*-(2-iodo-3,4-dihydronaphthalen-1-yl)benzamido)methyl)acrylate (**4bb**)

According to the general procedure, **4bb** was obtained in 99% yield and 93.5:6.5 er as a white solid.

**Specific rotation**  $[\alpha]^{25}_{\text{D}} = +67.7$  ( $c = 0.5$ , CH<sub>2</sub>Cl<sub>2</sub>)

**<sup>1</sup>H NMR (400 MHz, CDCl<sub>3</sub>)** δ 7.45 (d, *J* = 7.6 Hz, 2H), 7.24 – 7.13 (m, 4H), 7.08 (t, *J* = 7.5 Hz, 2H), 7.04 (d, *J* = 5.8 Hz, 1H), 6.38 (s, 1H), 6.09 (s, 1H), 4.65 (d, *J* = 14.5 Hz, 1H), 4.41 (d, *J* = 14.5 Hz, 1H), 3.53 (s, 3H), 2.78 (ddd, *J* = 31.2, 17.0, 7.2 Hz, 2H), 2.67 – 2.44 (m, 2H).

**<sup>13</sup>C NMR (101 MHz, CDCl<sub>3</sub>)** δ 170.6, 166.9, 143.1, 136.1, 136.0, 135.0, 132.3, 131.3, 130.3, 128.4, 127.9, 127.8, 127.3, 127.0, 123.7, 102.8, 51.9, 47.7, 39.0, 29.0.

**HRMS (ESI)** calcd for [C<sub>22</sub>H<sub>20</sub>INNaO<sub>3</sub>]<sup>+</sup>, *m/z*: 496.0380, found: 496.0401.

**HPLC analysis:** Daicel Chiralpak OD-H, hexane/isopropyl alcohol = 95/5, flow rate = 1.0 mL/min, UV = 210 nm, *t<sub>R</sub>* = 18.0 min (major), *t<sub>R</sub>* = 24.3 min (minor).

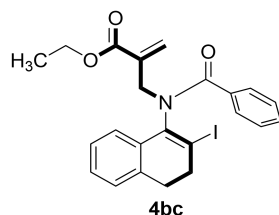

**ethyl 2-((N-(2-iodo-3,4-dihydronaphthalen-1-yl)benzamido)methyl)acrylate (4bc)**

According to the general procedure, **4bc** was obtained in 99% yield and 95.0:5.0 er as a white solid.

**Specific rotation** [ $\alpha$ ]<sub>D</sub><sup>25</sup> = +149.6 (*c* = 0.5, CH<sub>2</sub>Cl<sub>2</sub>)

**<sup>1</sup>H NMR (400 MHz, CDCl<sub>3</sub>)** δ 7.52 (d, *J* = 7.3 Hz, 2H), 7.32 – 7.20 (m, 4H), 7.16 (t, *J* = 7.7 Hz, 2H), 7.12 – 7.08 (m, 1H), 6.45 (d, *J* = 1.4 Hz, 1H), 6.16 (d, *J* = 1.4 Hz, 1H), 4.73 (d, *J* = 14.7 Hz, 1H), 4.52 (d, *J* = 14.4 Hz, 1H), 4.06 (dd, *J* = 7.1, 4.4 Hz, 2H), 2.92 – 2.76 (m, 2H), 2.75 – 2.66 (m, 1H), 2.56 (dt, *J* = 15.8, 6.8 Hz, 1H), 1.19 (t, *J* = 7.1 Hz, 3H).

**<sup>13</sup>C NMR (101 MHz, CDCl<sub>3</sub>)** δ 170.6, 166.4, 143.1, 136.1, 136.0, 135.4, 132.4, 131.0, 130.3, 128.4, 127.8, 127.8, 127.3, 126.9, 123.7, 102.7, 60.9, 47.5, 39.0, 29.0, 14.1.

**HRMS (ESI)** calcd for [C<sub>23</sub>H<sub>22</sub>INNaO<sub>3</sub>]<sup>+</sup>, *m/z*: 510.0537, found: 510.0555.

**HPLC analysis:** Daicel Chiralpak OD-H, hexane/isopropyl alcohol = 95/5, flow rate = 1.0 mL/min, UV = 210 nm, *t<sub>R</sub>* = 13.5 min (major), *t<sub>R</sub>* = 18.3 min (minor).

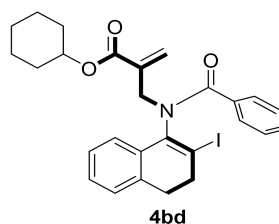

**cyclohexyl 2-((N-(2-iodo-3,4-dihydronaphthalen-1-yl)benzamido)methyl)acrylate (4bd)**

According to the general procedure, **4bd** was obtained in 99% yield and 95.0:5.0 er as a white solid.

**Specific rotation** [ $\alpha$ ]<sub>D</sub><sup>25</sup> = +55.9 (*c* = 0.5, CH<sub>2</sub>Cl<sub>2</sub>)

**<sup>1</sup>H NMR (400 MHz, CDCl<sub>3</sub>)** δ 7.55 – 7.48 (m, 2H), 7.35 – 7.27 (m, 2H), 7.25 – 7.19 (m, 2H), 7.15 (t, *J* = 7.7 Hz, 2H), 7.12 – 7.06 (m, 1H), 6.45 (d, *J* = 1.6 Hz, 1H), 6.15 (d, *J* = 1.4 Hz, 1H), 4.73 (d, *J* = 14.6 Hz, 2H), 4.52 (d, *J* = 14.4 Hz, 1H), 2.90 – 2.76 (m, 2H), 2.68 (ddd, *J* = 16.4, 12.5, 5.9 Hz, 1H), 2.62 – 2.50 (m, 1H), 1.80 – 1.73 (m, 2H), 1.69 (dd, *J* = 8.4, 5.7 Hz, 2H), 1.44 – 1.16 (m, 6H).

**<sup>13</sup>C NMR (101 MHz, CDCl<sub>3</sub>)** δ 170.6, 165.8, 143.1, 136.1, 135.8, 132.4, 130.8, 130.3, 128.4, 127.8, 127.8, 127.3, 126.9, 123.7, 102.7, 100.0, 73.0, 47.3, 39.0, 31.4, 29.1, 25.4, 23.6.

**HRMS (ESI)** calcd for [C<sub>27</sub>H<sub>28</sub>INNaO<sub>3</sub>]<sup>+</sup>, *m/z*: 564.1006, found: 564.1021.

**HPLC analysis:** Daicel Chiralpak OD-H, hexane/isopropyl alcohol = 95/5, flow rate = 1.0 mL/min, UV = 210 nm, *t<sub>R</sub>* = 10.3 min (major), *t<sub>R</sub>* = 14.5 min (minor).

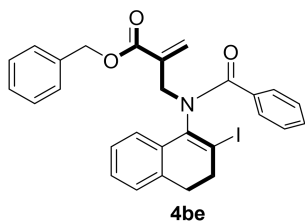

**benzyl 2-((N-(2-iodo-3,4-dihydronaphthalen-1-yl)benzamido)methyl)acrylate (4be)**

According to the general procedure, **4be** was obtained in 98% yield and 93.5:6.5 er as a colorless oil.

**Specific rotation**  $[\alpha]^{25}_D = +71.6$  ( $c = 0.5$ ,  $\text{CH}_2\text{Cl}_2$ )

**<sup>1</sup>H NMR (400 MHz,  $\text{CDCl}_3$ )**  $\delta$  7.50 (d,  $J = 7.4$  Hz, 2H), 7.34 – 7.24 (m, 7H), 7.23 – 7.18 (m, 2H), 7.15 (t,  $J = 7.7$  Hz, 2H), 7.10 – 7.03 (m, 1H), 6.51 (d,  $J = 1.4$  Hz, 1H), 6.22 (d,  $J = 1.4$  Hz, 1H), 5.03 (s, 2H), 4.76 (d,  $J = 14.4$  Hz, 1H), 4.53 (d,  $J = 14.3$  Hz, 1H), 2.80 – 2.60 (m, 3H), 2.55 – 2.44 (m, 1H).

**<sup>13</sup>C NMR (101 MHz,  $\text{CDCl}_3$ )**  $\delta$  170.6, 166.3, 143.0, 136.1, 135.9, 135.8, 135.1, 132.3, 131.9, 130.3, 128.5, 128.4, 128.1, 127.9, 127.3, 127.0, 123.7, 102.9, 66.6, 47.5, 38.8, 28.9.

**HRMS (ESI)** calcd for  $[\text{C}_{28}\text{H}_{24}\text{INNaO}_3]^+$ ,  $m/z$ : 572.0693, found: 572.0711.

**HPLC analysis:** Daicel Chiralpak OD-H, hexane/isopropyl alcohol = 75/25, flow rate = 1.0 mL/min, UV = 210 nm,  $t_R = 7.3$  min (major),  $t_R = 9.5$  min (minor).

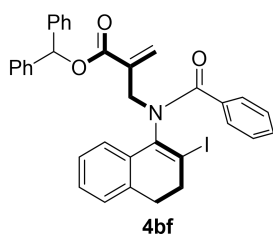

**benzhydryl 2-((N-(2-iodo-3,4-dihydronaphthalen-1-yl)benzamido)methyl)acrylate (4bf)**

According to the general procedure, **4bf** was obtained in 91% yield and 96.0:4.0 er as a white solid.

**Specific rotation**  $[\alpha]^{25}_D = +80.8$  ( $c = 0.5$ ,  $\text{CH}_2\text{Cl}_2$ )

**<sup>1</sup>H NMR (400 MHz,  $\text{CDCl}_3$ )**  $\delta$  7.50 (d,  $J = 7.3$  Hz, 2H), 7.36 – 7.22 (m, 12H), 7.19 – 7.08 (m, 4H), 7.04 (d,  $J = 7.3$  Hz, 1H), 6.82 (s, 1H), 6.61 (d,  $J = 1.4$  Hz, 1H), 6.25 (d,  $J = 1.4$  Hz, 1H), 4.87 (d,  $J = 14.3$  Hz, 1H), 4.53 (d,  $J = 14.3$  Hz, 1H), 2.64 (dd,  $J = 11.5, 6.5$  Hz, 3H), 2.48 – 2.34 (m, 1H).

**<sup>13</sup>C NMR (101 MHz,  $\text{CDCl}_3$ )**  $\delta$  170.7, 165.4, 142.6, 140.2, 140.2, 136.2, 136.0, 135.3, 132.4, 132.1, 130.3, 128.5, 128.5, 128.4, 127.9, 127.9, 127.8, 127.3, 127.3, 127.2, 127.0, 123.6, 103.0, 100.0, 77.6, 46.7, 38.9, 28.8.

**HRMS (ESI)** calcd for  $[\text{C}_{34}\text{H}_{28}\text{INNaO}_3]^+$ ,  $m/z$ : 648.1006, found: 648.1026.

**HPLC analysis:** Daicel Chiralpak OD-H, hexane/isopropyl alcohol = 75/25, flow rate = 1.0 mL/min, UV = 210 nm,  $t_R = 7.3$  min (major),  $t_R = 8.5$  min (minor).

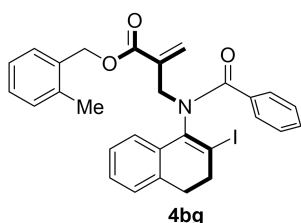

**2-methylbenzyl 2-((N-(2-iodo-3,4-dihydronaphthalen-1-yl)benzamido)methyl)acrylate (4bg)**

According to the general procedure, **4bg** was obtained in 96% yield and 95.5:4.5 er as a white solid.

**Specific rotation**  $[\alpha]^{25}_D = +99.2$  ( $c = 0.5$ ,  $\text{CH}_2\text{Cl}_2$ )

**<sup>1</sup>H NMR (400 MHz, CDCl<sub>3</sub>)** δ 7.49 (d, *J* = 7.2 Hz, 2H), 7.31 – 7.23 (m, 3H), 7.21 (dd, *J* = 8.9, 4.5 Hz, 3H), 7.18 – 7.12 (m, 4H), 7.10 – 7.02 (m, 1H), 6.51 (s, 1H), 6.23 (s, 1H), 5.05 (s, 2H), 4.75 (d, *J* = 14.4 Hz, 1H), 4.53 (d, *J* = 14.4 Hz, 1H), 2.73 (ddd, *J* = 14.2, 11.2, 6.8 Hz, 1H), 2.62 (dd, *J* = 11.9, 4.7 Hz, 2H), 2.56 – 2.45 (m, 1H), 2.29 (s, 3H).

**<sup>13</sup>C NMR (101 MHz, CDCl<sub>3</sub>)** δ 170.6, 166.2, 143.0, 137.0, 136.1, 136.0, 135.1, 133.8, 132.3, 131.9, 130.3, 129.2, 128.4, 128.4, 127.8, 127.8, 127.3, 126.9, 125.9, 123.7, 102.8, 65.1, 47.5, 38.8, 28.9, 19.0.

**HRMS (ESI)** calcd for [C<sub>29</sub>H<sub>26</sub>INNaO<sub>3</sub>]<sup>+</sup>, *m/z*: 586.0850, found: 586.0848.

**HPLC analysis:** Daicel Chiralpak OD-H, hexane/isopropyl alcohol = 75/25, flow rate = 1.0 mL/min, UV = 210 nm, *t<sub>R</sub>* = 7.7 min (major), *t<sub>R</sub>* = 10.4 min (minor).

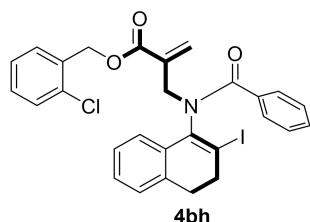

#### 2-chlorobenzyl 2-((*N*-(2-iodo-3,4-dihydronaphthalen-1-yl)benzamido)methyl)acrylate (**4bh**)

According to the general procedure, **4bh** was obtained in 93% yield and 93.0:7.0 er as a white solid.

**Specific rotation** [ $\alpha$ ]<sub>D</sub><sup>25</sup> = +93.2 (*c* = 0.5, CH<sub>2</sub>Cl<sub>2</sub>)

**<sup>1</sup>H NMR (400 MHz, CDCl<sub>3</sub>)** δ 7.51 (d, *J* = 8.5 Hz, 2H), 7.37 – 7.33 (m, 2H), 7.30 – 7.24 (m, 3H), 7.24 – 7.19 (m, 3H), 7.16 (t, *J* = 7.7 Hz, 2H), 7.11 – 7.04 (m, 1H), 6.55 (d, *J* = 1.4 Hz, 1H), 6.27 (d, *J* = 1.3 Hz, 1H), 5.15 (s, 2H), 4.79 (d, *J* = 14.4 Hz, 1H), 4.53 (d, *J* = 14.4 Hz, 1H), 2.82 – 2.62 (m, 3H), 2.52 (dt, *J* = 14.3, 6.0 Hz, 1H).

**<sup>13</sup>C NMR (101 MHz, CDCl<sub>3</sub>)** δ 170.6, 166.1, 143.0, 136.2, 135.9, 135.0, 133.6, 133.5, 132.2, 132.1, 130.3, 129.7, 129.5, 129.4, 128.4, 127.9, 127.3, 127.0, 126.8, 123.7, 102.8, 63.9, 47.4, 38.9, 28.9.

**HRMS (ESI)** calcd for [C<sub>28</sub>H<sub>23</sub>ClINNaO<sub>3</sub>]<sup>+</sup>, *m/z*: 606.0303, found: 606.0316.

**HPLC analysis:** Daicel Chiralpak OD-H, hexane/isopropyl alcohol = 75/25, flow rate = 1.0 mL/min, UV = 210 nm, *t<sub>R</sub>* = 7.5 min (major), *t<sub>R</sub>* = 10.1 min (minor).

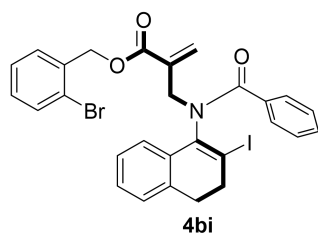

#### 2-bromobenzyl 2-((*N*-(2-iodo-3,4-dihydronaphthalen-1-yl)benzamido)methyl)acrylate (**4bi**)

According to the general procedure, **4bi** was obtained in 96% yield and 95.0:5.0 er as a white solid.

**Specific rotation** [ $\alpha$ ]<sub>D</sub><sup>25</sup> = +97.9 (*c* = 0.5, CH<sub>2</sub>Cl<sub>2</sub>)

**<sup>1</sup>H NMR (400 MHz, CDCl<sub>3</sub>)** δ 7.51 (d, *J* = 8.5 Hz, 2H), 7.37 – 7.33 (m, 2H), 7.30 – 7.24 (m, 3H), 7.24 – 7.19 (m, 3H), 7.16 (t, *J* = 7.7 Hz, 2H), 7.11 – 7.04 (m, 1H), 6.55 (d, *J* = 1.4 Hz, 1H), 6.27 (d, *J* = 1.3 Hz, 1H), 5.15 (s, 2H), 4.79 (d, *J* = 14.4 Hz, 1H), 4.53 (d, *J* = 14.4 Hz, 1H), 2.82 – 2.62 (m, 3H), 2.52 (dt, *J* = 14.3, 6.0 Hz, 1H).

**<sup>13</sup>C NMR (101 MHz, CDCl<sub>3</sub>)** δ 170.6, 166.0, 143.0, 136.2, 135.9, 135.2, 135.0, 132.8, 132.2, 130.3, 129.8, 129.6, 128.4, 127.9, 127.4, 127.3, 127.0, 123.7, 123.3, 102.8, 66.1, 47.4, 38.9, 28.9.

**HRMS (ESI)** calcd for [C<sub>28</sub>H<sub>23</sub>BrINNaO<sub>3</sub>]<sup>+</sup>, *m/z*: 649.9798, found: 649.9801.

**HPLC analysis:** Daicel Chiralpak OD-H, hexane/isopropyl alcohol = 75/25, flow rate = 1.0 mL/min, UV = 210 nm,  $t_R$  = 8.1 min (major),  $t_R$  = 10.8 min (minor).

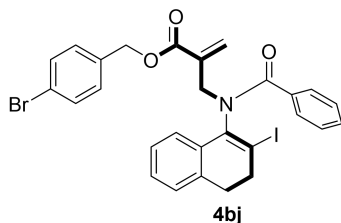

**4-bromobenzyl 2-((N-(2-iodo-3,4-dihydronaphthalen-1-yl)benzamido)methyl)acrylate (4bj)**

According to the general procedure, **4bj** was obtained in 99% yield and 96.0:4.0 er as a white solid.

**Specific rotation**  $[\alpha]^{25}_D = +83.5$  ( $c = 0.5$ ,  $\text{CH}_2\text{Cl}_2$ )

**$^1\text{H}$  NMR (400 MHz,  $\text{CDCl}_3$ )**  $\delta$  7.53 – 7.48 (m, 2H), 7.44 (d,  $J = 8.4$  Hz, 2H), 7.29 – 7.25 (m, 2H), 7.24 – 7.19 (m, 2H), 7.19 – 7.11 (m, 4H), 7.10 – 7.06 (m, 1H), 6.50 (d,  $J = 1.4$  Hz, 1H), 6.23 (d,  $J = 1.4$  Hz, 1H), 4.99 (s, 2H), 4.77 (d,  $J = 14.4$  Hz, 1H), 4.50 (d,  $J = 14.4$  Hz, 1H), 2.80 – 2.61 (m, 3H), 2.58 – 2.46 (m, 1H).

**$^{13}\text{C}$  NMR (101 MHz,  $\text{CDCl}_3$ )**  $\delta$  170.6, 166.1, 142.9, 136.1, 135.9, 135.0, 134.8, 132.2, 132.1, 131.6, 130.4, 129.9, 128.4, 127.9, 127.3, 127.2, 127.0, 123.7, 122.2, 102.8, 65.8, 47.4, 38.9, 28.9.

**HRMS (ESI)** calcd for  $[\text{C}_{28}\text{H}_{23}\text{BrINNaO}_3]^+$ ,  $m/z$ : 649.9798, found: 649.9800.

**HPLC analysis:** Daicel Chiralpak OD-H, hexane/isopropyl alcohol = 75/25, flow rate = 1.0 mL/min, UV = 210 nm,  $t_R$  = 9.0 min (major),  $t_R$  = 11.1 min (minor).

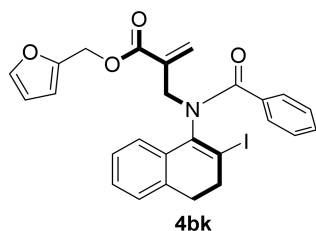

**furan-2-ylmethyl 2-((N-(2-iodo-3,4-dihydronaphthalen-1-yl)benzamido)methyl)acrylate (4bk)**

According to the general procedure, **4bk** was obtained in 96% yield and 95.0:5.0 er as a white solid.

**Specific rotation**  $[\alpha]^{25}_D = +99.6$  ( $c = 0.5$ ,  $\text{CH}_2\text{Cl}_2$ )

**$^1\text{H}$  NMR (400 MHz,  $\text{CDCl}_3$ )**  $\delta$  7.55 – 7.47 (m, 2H), 7.42 – 7.34 (m, 1H), 7.32 – 7.26 (m, 2H), 7.24 – 7.20 (m, 2H), 7.18 – 7.08 (m, 3H), 6.48 (d,  $J = 1.4$  Hz, 1H), 6.42 – 6.30 (m, 2H), 6.20 (d,  $J = 1.3$  Hz, 1H), 4.99 (s, 2H), 4.73 (d,  $J = 14.4$  Hz, 1H), 4.48 (d,  $J = 14.4$  Hz, 1H), 2.90 – 2.63 (m, 3H), 2.62 – 2.48 (m, 1H).

**$^{13}\text{C}$  NMR (101 MHz,  $\text{CDCl}_3$ )**  $\delta$  170.6, 166.0, 149.3, 143.1, 143.0, 136.2, 136.0, 134.9, 132.3, 131.9, 130.3, 128.4, 127.9, 127.8, 127.3, 127.0, 123.7, 110.7, 110.5, 102.9, 58.4, 47.6, 38.9, 29.0.

**HRMS (ESI)** calcd for  $[\text{C}_{26}\text{H}_{22}\text{INNaO}_4]^+$ ,  $m/z$ : 562.0486, found: 562.0499.

**HPLC analysis:** Daicel Chiralpak OD-H, hexane/isopropyl alcohol = 75/25, flow rate = 1.0 mL/min, UV = 210 nm,  $t_R$  = 7.2 min (major),  $t_R$  = 9.3 min (minor).

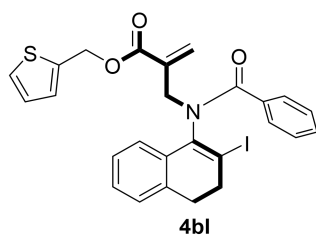



**thiophen-2-ylmethyl 2-((N-(2-iodo-3,4-dihydronaphthalen-1-yl)benzamido)methyl)acrylate (4bl)**

According to the general procedure, **4bl** was obtained in 84% yield and 93.5:6.5 er as a white solid.

**Specific rotation**  $[\alpha]^{25}_D = +83.9$  ( $c = 0.5$ ,  $\text{CH}_2\text{Cl}_2$ )

**$^1\text{H NMR}$  (400 MHz,  $\text{CDCl}_3$ )**  $\delta$  7.50 (d,  $J = 7.2$  Hz, 2H), 7.30 – 7.24 (m, 3H), 7.24 – 7.18 (m, 2H), 7.15 (t,  $J = 7.7$  Hz, 2H), 7.11 – 7.06 (m, 1H), 7.02 (d,  $J = 3.3$  Hz, 1H), 6.94 (dd,  $J = 5.0, 3.5$  Hz, 1H), 6.49 (d,  $J = 1.4$  Hz, 1H), 6.21 (d,  $J = 1.3$  Hz, 1H), 5.18 (s, 2H), 4.74 (d,  $J = 14.9$  Hz, 1H), 4.50 (d,  $J = 14.4$  Hz, 1H), 2.86 – 2.60 (m, 3H), 2.59 – 2.44 (m, 1H).

**$^{13}\text{C NMR}$  (101 MHz,  $\text{CDCl}_3$ )**  $\delta$  170.6, 166.1, 143.0, 137.7, 136.1, 135.9, 134.9, 132.3, 132.1, 130.3, 128.4, 128.2, 127.9, 127.3, 127.0, 126.8, 126.8, 123.7, 103.0, 61.0, 47.5, 38.9, 29.0.

**HRMS (ESI)** calcd for  $[\text{C}_{26}\text{H}_{22}\text{INNaO}_3\text{S}]^+$ ,  $m/z$ : 578.0257, found: 578.0263.

**HPLC analysis:** Daicel Chiralpak OD-H, hexane/isopropyl alcohol = 75/25, flow rate = 1.0 mL/min, UV = 210 nm,  $t_R = 7.9$  min (major),  $t_R = 10.8$  min (minor).

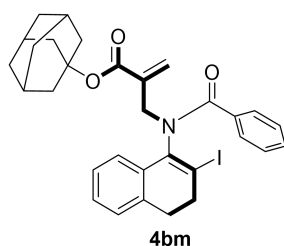

**adamantan-1-yl 2-((N-(2-iodo-3,4-dihydronaphthalen-1-yl)benzamido)methyl)acrylate (4bm)**

According to the general procedure, **4bm** was obtained in 97% yield and 97.5:2.5 er as a white solid.

**Specific rotation**  $[\alpha]^{25}_D = +42.5$  ( $c = 0.5$ ,  $\text{CH}_2\text{Cl}_2$ )

**$^1\text{H NMR}$  (400 MHz,  $\text{CDCl}_3$ )**  $\delta$  7.50 (d,  $J = 7.3$  Hz, 2H), 7.33 – 7.29 (m, 1H), 7.29 – 7.20 (m, 3H), 7.15 (t,  $J = 7.7$  Hz, 2H), 7.09 (d,  $J = 6.4$  Hz, 1H), 6.37 (d,  $J = 1.7$  Hz, 1H), 6.10 (d,  $J = 1.7$  Hz, 1H), 4.67 (d,  $J = 14.4$  Hz, 1H), 4.53 (d,  $J = 14.4$  Hz, 1H), 2.91 – 2.78 (m, 2H), 2.76 – 2.64 (m, 1H), 2.61 – 2.49 (m, 1H), 2.12 (s, 3H), 2.04 (d,  $J = 2.9$  Hz, 6H), 1.63 (s, 6H).

**$^{13}\text{C NMR}$  (101 MHz,  $\text{CDCl}_3$ )**  $\delta$  170.6, 165.2, 143.1, 136.8, 136.2, 135.9, 132.5, 130.3, 130.2, 128.3, 127.8, 127.7, 127.3, 127.0, 123.8, 102.7, 80.8, 47.1, 41.2, 39.0, 36.2, 30.8, 29.1.

**HRMS (ESI)** calcd for  $[\text{C}_{31}\text{H}_{32}\text{INNaO}_3]^+$ ,  $m/z$ : 616.1319, found: 616.1340.

**HPLC analysis:** Daicel Chiralpak OD-H, hexane/isopropyl alcohol = 95/5, flow rate = 1.0 mL/min, UV = 210 nm,  $t_R = 9.3$  min (major),  $t_R = 13.1$  min (minor).

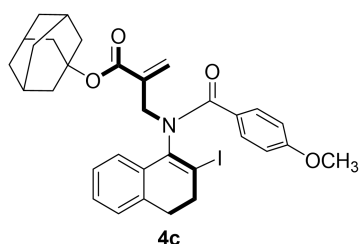

**adamantan-1-yl 2-((N-(2-iodo-3,4-dihydronaphthalen-1-yl)-4-methoxybenzamido)methyl)acrylate (4c)**

According to the general procedure, **4c** was obtained in 81% yield and 95.0:5.0 er as a white solid.

**Specific rotation**  $[\alpha]^{25}_D = +30.8$  ( $c = 0.5$ ,  $\text{CH}_2\text{Cl}_2$ )

**$^1\text{H NMR}$  (400 MHz,  $\text{CDCl}_3$ )**  $\delta$  7.51 (d,  $J = 8.9$  Hz, 2H), 7.35 – 7.28 (m, 1H), 7.23 (dd,  $J = 5.8, 2.1$  Hz, 2H), 7.15 – 7.09 (m, 1H), 6.68 (d,  $J = 8.9$  Hz, 2H), 6.36 (d,  $J = 1.8$  Hz, 1H), 6.09 (d,  $J = 1.6$  Hz, 1H), 4.65 (d,  $J = 14.5$  Hz, 1H), 4.47 (d,  $J = 14.5$  Hz, 1H), 3.75 (s, 3H), 2.97 – 2.80 (m, 2H), 2.79 – 2.68 (m, 1H), 2.65 – 2.58 (m, 1H), 2.13 (s, 3H), 2.05 (d,  $J = 2.9$  Hz, 6H), 1.63 (s, 6H).

$^{13}\text{C}$  NMR (101 MHz,  $\text{CDCl}_3$ )  $\delta$  170.1, 165.3, 161.1, 143.3, 136.8, 136.1, 132.4, 130.1, 129.9, 128.4, 128.3, 127.8, 127.1, 123.8, 112.6, 102.5, 80.7, 55.2, 47.2, 41.1, 39.1, 36.2, 30.8, 29.1.

HRMS (ESI) calcd for  $[\text{C}_{32}\text{H}_{34}\text{INaO}_4]^+$ ,  $m/z$ : 646.1425, found: 646.1443.

HPLC analysis: Daicel Chiralpak OD-H, hexane/isopropyl alcohol = 90/10, flow rate = 1.0 mL/min, UV = 210 nm,  $t_R$  = 10.4 min (major),  $t_R$  = 23.8 min (minor).

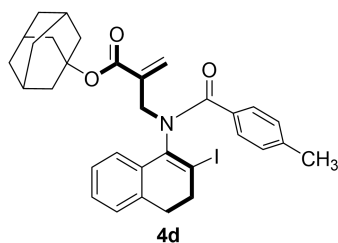

**adamantan-1-yl 2-((N-(2-iodo-3,4-dihydronaphthalen-1-yl)-4-methylbenzamido)methyl)acrylate (4d)**

According to the general procedure, **4d** was obtained in 72% yield and 95.5:4.5 er as a white solid.

Specific rotation  $[\alpha]^{25}_D = +32.7$  ( $c = 0.5$ ,  $\text{CH}_2\text{Cl}_2$ )

$^1\text{H}$  NMR (400 MHz,  $\text{CDCl}_3$ )  $\delta$  7.42 (d,  $J = 8.1$  Hz, 2H), 7.34 – 7.29 (m, 1H), 7.25 – 7.17 (m, 2H), 7.13 – 7.08 (m, 1H), 6.95 (d,  $J = 7.9$  Hz, 2H), 6.36 (d,  $J = 1.7$  Hz, 1H), 6.09 (d,  $J = 1.7$  Hz, 1H), 4.65 (d,  $J = 14.5$  Hz, 1H), 4.50 (d,  $J = 14.5$  Hz, 1H), 2.93 – 2.78 (m, 2H), 2.77 – 2.66 (m, 1H), 2.64 – 2.52 (m, 1H), 2.26 (s, 3H), 2.12 (s, 3H), 2.04 (d,  $J = 5.0$  Hz, 6H), 1.63 (s, 6H).

$^{13}\text{C}$  NMR (101 MHz,  $\text{CDCl}_3$ )  $\delta$  170.6, 165.3, 143.2, 140.3, 136.8, 136.0, 133.3, 132.5, 130.2, 128.3, 128.0, 127.9, 127.7, 127.0, 123.9, 102.6, 80.7, 47.2, 41.1, 39.0, 36.2, 30.8, 29.1, 21.4.

HRMS (ESI) calcd for  $[\text{C}_{32}\text{H}_{34}\text{INaO}_3]^+$ ,  $m/z$ : 630.1476, found: 630.1484.

HPLC analysis: Daicel Chiralpak OD-H, hexane/isopropyl alcohol = 90/10, flow rate = 1.0 mL/min, UV = 210 nm,  $t_R$  = 7.5 min (major),  $t_R$  = 10.5 min (minor).

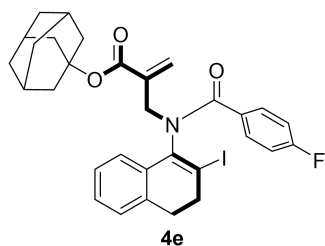

**adamantan-1-yl 2-((4-fluoro-N-(2-iodo-3,4-dihydronaphthalen-1-yl)benzamido)methyl)acrylate (4e)**

According to the general procedure, **4e** was obtained in 99% yield and 95.5:4.5 er as a white solid.

Specific rotation  $[\alpha]^{25}_D = +53.3$  ( $c = 0.5$ ,  $\text{CH}_2\text{Cl}_2$ )

$^1\text{H}$  NMR (400 MHz,  $\text{CDCl}_3$ )  $\delta$  7.52 (dd,  $J = 8.7, 5.5$  Hz, 2H), 7.29 (d,  $J = 9.2$  Hz, 1H), 7.23 (dd,  $J = 5.6, 3.2$  Hz, 2H), 7.14 – 7.08 (m, 1H), 6.84 (t,  $J = 8.7$  Hz, 2H), 6.36 (d,  $J = 1.7$  Hz, 1H), 6.08 (d,  $J = 1.6$  Hz, 1H), 4.67 (d,  $J = 14.4$  Hz, 1H), 4.49 (d,  $J = 14.3$  Hz, 1H), 2.94 – 2.80 (m, 2H), 2.77 – 2.65 (m, 1H), 2.64 – 2.53 (m, 1H), 2.12 (s, 3H), 2.03 (d,  $J = 6.0$  Hz, 6H), 1.63 (s, 6H).

$^{13}\text{C}$  NMR (101 MHz,  $\text{CDCl}_3$ )  $\delta$  169.5, 165.2, 163.7 (d,  $J = 250.0$  Hz), 143.0, 136.7, 136.0, 132.3, 130.4, 130.1 (d,  $J = 8.7$  Hz), 128.5, 127.9, 127.1, 123.7, 114.4 (d,  $J = 21.7$  Hz), 102.8, 100.0, 80.8, 47.2, 41.2, 39.0, 36.2, 30.8, 29.1.

$^{19}\text{F}$  NMR (376 MHz,  $\text{CDCl}_3$ )  $\delta$  -109.66.

HRMS (ESI) calcd for  $[\text{C}_{31}\text{H}_{31}\text{FINaO}_3]^+$ ,  $m/z$ : 634.1225, found: 634.1224.

HPLC analysis: Daicel Chiralpak AD-H, hexane/isopropyl alcohol = 75/25, flow rate = 1.0 mL/min, UV = 210 nm,  $t_R$  = 9.5 min (minor),  $t_R$  = 14.7 min (major).

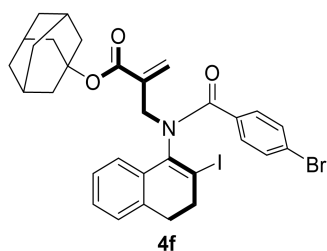

**adamantan-1-yl 2-((4-bromo-*N*-(2-iodo-3,4-dihydronaphthalen-1-yl)benzamido)methyl)acrylate (**4f**)**

According to the general procedure, **4f** was obtained in 97% yield and 96.5:3.5 er as a white solid.

**Specific rotation**  $[\alpha]^{25}_D = +62.0$  ( $c = 0.5$ ,  $\text{CH}_2\text{Cl}_2$ )

**$^1\text{H}$  NMR (400 MHz,  $\text{CDCl}_3$ )**  $\delta$  7.39 (d,  $J = 8.6$  Hz, 2H), 7.30 (d,  $J = 2.0$  Hz, 1H), 7.28 (t,  $J = 2.0$  Hz, 1H), 7.27 (d,  $J = 5.3$  Hz, 1H), 7.26 – 7.20 (m, 2H), 7.15 – 7.08 (m, 1H), 6.36 (d,  $J = 1.7$  Hz, 1H), 6.07 (d,  $J = 1.6$  Hz, 1H), 4.66 (d,  $J = 14.3$  Hz, 1H), 4.49 (d,  $J = 14.3$  Hz, 1H), 2.98 – 2.79 (m, 2H), 2.71 (ddd,  $J = 16.5$ , 12.6, 6.0 Hz, 1H), 2.58 (dt,  $J = 15.9$ , 7.0 Hz, 1H), 2.12 (s, 3H), 2.04 (d,  $J = 3.0$  Hz, 6H), 1.63 (s, 6H).

**$^{13}\text{C}$  NMR (101 MHz,  $\text{CDCl}_3$ )**  $\delta$  169.5, 165.1, 142.8, 136.6, 136.0, 135.1, 132.2, 130.5, 129.4, 128.5, 127.9, 127.1, 124.7, 123.7, 103.1, 80.9, 47.1, 41.2, 39.0, 36.2, 30.8, 29.0.

**HRMS (ESI)** calcd for  $[\text{C}_{31}\text{H}_{32}\text{BrINO}_3]^+$ ,  $m/z$ : 672.0605, found: 672.0605.

**HPLC analysis:** Daicel Chiralpak IC, hexane/isopropyl alcohol = 75/25, flow rate = 1.0 mL/min, UV = 210 nm,  $t_R = 19.0$  min (major),  $t_R = 22.1$  min (minor).

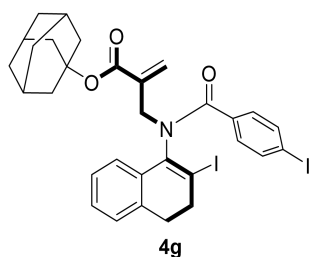

**adamantan-1-yl 2-((4-iodo-*N*-(2-iodo-3,4-dihydronaphthalen-1-yl)benzamido)methyl)acrylate (**4g**)**

According to the general procedure, **4g** was obtained in 95% yield and 98.5:1.5 er as a white solid.

**Specific rotation**  $[\alpha]^{25}_D = +49.9$  ( $c = 0.5$ ,  $\text{CH}_2\text{Cl}_2$ )

**$^1\text{H}$  NMR (400 MHz,  $\text{CDCl}_3$ )**  $\delta$  7.51 (d,  $J = 8.5$  Hz, 2H), 7.31 – 7.25 (m, 2H), 7.23 (dd,  $J = 6.4$ , 2.5 Hz, 3H), 7.14 – 7.08 (m, 1H), 6.36 (d,  $J = 1.7$  Hz, 1H), 6.07 (d,  $J = 1.7$  Hz, 1H), 4.65 (d,  $J = 14.3$  Hz, 1H), 4.48 (d,  $J = 14.3$  Hz, 1H), 2.96 – 2.79 (m, 2H), 2.71 (ddd,  $J = 16.5$ , 12.7, 6.0 Hz, 1H), 2.58 (dt,  $J = 16.0$ , 6.9 Hz, 1H), 2.12 (s, 3H), 2.03 (d,  $J = 2.9$  Hz, 6H), 1.63 (s, 6H).

**$^{13}\text{C}$  NMR (101 MHz,  $\text{CDCl}_3$ )**  $\delta$  169.7, 165.1, 142.7, 136.6, 136.5, 136.0, 135.7, 132.2, 130.5, 129.4, 128.5, 127.9, 127.1, 123.7, 103.1, 97.0, 80.8, 47.1, 41.1, 39.0, 36.2, 30.8, 29.0.

**HRMS (ESI)** calcd for  $[\text{C}_{31}\text{H}_{32}\text{I}_2\text{NO}_3]^+$ ,  $m/z$ : 720.0466, found: 720.0477.

**HPLC analysis:** Daicel Chiralpak IC, hexane/isopropyl alcohol = 75/25, flow rate = 1.0 mL/min, UV = 210 nm,  $t_R = 20.6$  min (major),  $t_R = 26.0$  min (minor).

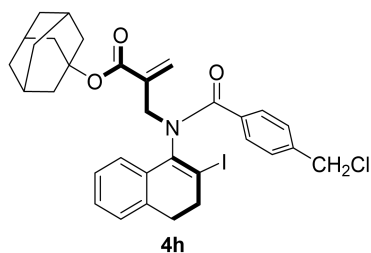

**adamantan-1-yl 2-((4-(chloromethyl)-*N*-(2-iodo-3,4-dihydronaphthalen-1-yl)benzamido)methyl)acrylate (4h)**

According to the general procedure, **4h** was obtained in 64% yield and 97.5:2.5 er as a white solid.

**Specific rotation**  $[\alpha]^{25}_{\text{D}} = +50.9$  ( $c = 0.5$ ,  $\text{CH}_2\text{Cl}_2$ )

**$^1\text{H}$  NMR (400 MHz,  $\text{CDCl}_3$ )**  $\delta$  7.50 (d,  $J = 8.2$  Hz, 2H), 7.33 – 7.28 (m, 1H), 7.23 (dd,  $J = 6.0, 2.6$  Hz, 2H), 7.18 (d,  $J = 8.2$  Hz, 2H), 7.13 – 7.07 (m, 1H), 6.37 (d,  $J = 1.7$  Hz, 1H), 6.09 (d,  $J = 1.6$  Hz, 1H), 4.66 (d,  $J = 14.4$  Hz, 1H), 4.55 – 4.45 (m, 3H), 2.91 – 2.79 (m, 2H), 2.69 (ddd,  $J = 16.7, 12.4, 5.9$  Hz, 1H), 2.56 (dt,  $J = 14.1, 6.9$  Hz, 1H), 2.13 (s, 3H), 2.04 (s, 6H), 1.63 (s, 6H).

**$^{13}\text{C}$  NMR (101 MHz,  $\text{CDCl}_3$ )**  $\delta$  170.0, 165.2, 142.9, 139.3, 136.7, 136.2, 136.0, 132.4, 130.4, 128.4, 128.2, 127.8, 127.4, 127.1, 123.8, 102.9, 80.8, 47.1, 45.6, 41.2, 39.0, 36.2, 30.8, 29.1.

**HRMS (ESI)** calcd for  $[\text{C}_{32}\text{H}_{33}\text{ClINNaO}_3]^+$ ,  $m/z$ : 664.1086, found: 664.1095.

**HPLC analysis:** Daicel Chiralpak OD-H, hexane/isopropyl alcohol = 75/25, flow rate = 1.0 mL/min, UV = 210 nm,  $t_{\text{R}} = 6.5$  min (major),  $t_{\text{R}} = 8.1$  min (minor).

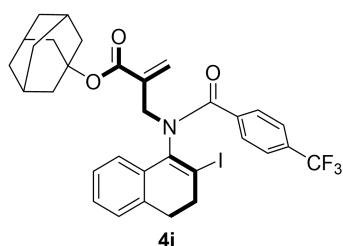

**adamantan-1-yl 2-((*N*-(2-iodo-3,4-dihydronaphthalen-1-yl)-4-(trifluoromethyl)benzamido)methyl)acrylate (4i)**

According to the general procedure, **4i** was obtained in 63% yield and 96.5:3.5 er as a white solid.

**Specific rotation**  $[\alpha]^{25}_{\text{D}} = +47.6$  ( $c = 0.5$ ,  $\text{CH}_2\text{Cl}_2$ )

**$^1\text{H}$  NMR (400 MHz,  $\text{CDCl}_3$ )**  $\delta$  7.62 (d,  $J = 8.1$  Hz, 2H), 7.43 (d,  $J = 8.2$  Hz, 2H), 7.33 – 7.28 (m, 1H), 7.27 – 7.20 (m, 2H), 7.14 – 7.07 (m, 1H), 6.38 (d,  $J = 1.7$  Hz, 1H), 6.09 (d,  $J = 1.6$  Hz, 1H), 4.70 (d,  $J = 14.2$  Hz, 1H), 4.53 (d,  $J = 14.2$  Hz, 1H), 2.92–2.80 (m, 2H), 2.75 – 2.62 (m, 1H), 2.60 – 2.49 (m, 1H), 2.13 (s, 3H), 2.04 (d,  $J = 2.9$  Hz, 6H), 1.63 (s, 6H).

**$^{13}\text{C}$  NMR (101 MHz,  $\text{CDCl}_3$ )**  $\delta$  169.2, 165.1, 142.5, 139.6, 136.5, 136.0, 132.2, 131.8 (d,  $J = 32.6$  Hz), 130.7, 128.6, 128.0, 128.0, 127.1, 124.3 (q,  $J = 3.4$  Hz), 123.6, 103.3, 80.9, 47.1, 41.2, 38.9, 36.2, 30.8, 29.0.

**$^{19}\text{F}$  NMR (376 MHz,  $\text{CDCl}_3$ )**  $\delta$  -62.88.

**HRMS (ESI)** calcd for  $[\text{C}_{32}\text{H}_{31}\text{F}_3\text{INNaO}_3]^+$ ,  $m/z$ : 684.1193, found: 684.1200.

**HPLC analysis:** Daicel Chiralpak IC, hexane/isopropyl alcohol = 50/10, flow rate = 1.0 mL/min, UV = 210 nm,  $t_{\text{R}} = 14.8$  min (major),  $t_{\text{R}} = 19.7$  min (minor).

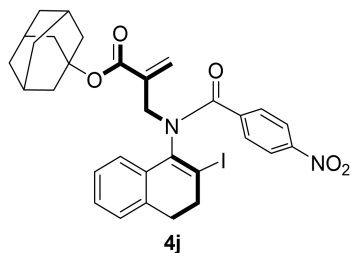

**adamantan-1-yl 2-((*N*-(2-iodo-3,4-dihydronaphthalen-1-yl)-4-nitrobenzamido)methyl)acrylate (4j)**

According to the general procedure, **4j** was obtained in 86% yield and 97.5:2.5 er as a white solid.

**Specific rotation**  $[\alpha]^{25}_{\text{D}} = +47.7$  ( $c = 0.5$ ,  $\text{CH}_2\text{Cl}_2$ )

**<sup>1</sup>H NMR (400 MHz, CDCl<sub>3</sub>)** δ 8.02 (d, *J* = 8.8 Hz, 2H), 7.66 (d, *J* = 8.8 Hz, 2H), 7.28 (dt, *J* = 7.0, 4.0 Hz, 2H), 7.26 – 7.21 (m, 1H), 7.16 – 7.07 (m, 1H), 6.38 (d, *J* = 1.7 Hz, 1H), 6.08 (d, *J* = 1.6 Hz, 1H), 4.72 (d, *J* = 14.1 Hz, 1H), 4.54 (d, *J* = 14.1 Hz, 1H), 2.96 – 2.79 (m, 2H), 2.76 – 2.62 (m, 1H), 2.62 – 2.49 (m, 1H), 2.13 (s, 3H), 2.04 (d, *J* = 3.0 Hz, 6H), 1.63 (s, 6H).

**<sup>13</sup>C NMR (101 MHz, CDCl<sub>3</sub>)** δ 168.4, 165.0, 148.5, 142.3, 142.2, 136.4, 135.9, 132.0, 131.0, 128.8, 128.7, 128.1, 127.2, 123.5, 122.5, 103.6, 81.0, 47.1, 41.2, 38.9, 36.2, 30.8, 28.9.

**HRMS (ESI)** calcd for [C<sub>31</sub>H<sub>31</sub>IN<sub>2</sub>NaO<sub>5</sub>]<sup>+</sup>, *m/z*: 661.1170, found: 661.1183.

**HPLC analysis:** Daicel Chiralpak IC, hexane/isopropyl alcohol = 75/25, flow rate = 1.0 mL/min, UV = 210 nm, *t<sub>R</sub>* = 26.1 min (minor), *t<sub>R</sub>* = 29.7 min (major).

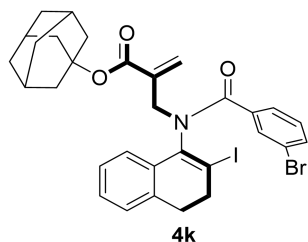

**adamantan-1-yl 2-((3-bromo-*N*-(2-iodo-3,4-dihydronaphthalen-1-yl)benzamido)methyl)acrylate (4k)**

According to the general procedure, **4k** was obtained in 91% yield and 95.5:4.5 er as a white solid.

**Specific rotation** [ $\alpha$ ]<sup>25</sup><sub>D</sub> = +32.3 (*c* = 0.5, CH<sub>2</sub>Cl<sub>2</sub>)

**<sup>1</sup>H NMR (400 MHz, CDCl<sub>3</sub>)** δ 7.70 (t, *J* = 1.6 Hz, 1H), 7.38 (dd, *J* = 15.9, 7.9 Hz, 2H), 7.26 – 7.19 (m, 3H), 7.13 – 7.07 (m, 1H), 7.00 (t, *J* = 7.9 Hz, 1H), 6.37 (d, *J* = 1.7 Hz, 1H), 6.08 (d, *J* = 1.6 Hz, 1H), 4.71 – 4.51 (m, 2H), 2.91 – 2.80 (m, 2H), 2.79 – 2.66 (m, 1H), 2.65 – 2.52 (m, 1H), 2.12 (s, 3H), 2.03 (d, *J* = 2.9 Hz, 6H), 1.63 (t, *J* = 3.0 Hz, 6H).

**<sup>13</sup>C NMR (101 MHz, CDCl<sub>3</sub>)** δ 168.9, 165.1, 142.8, 137.9, 136.6, 135.9, 133.1, 132.3, 131.3, 130.6, 128.8, 128.5, 127.8, 127.1, 125.9, 123.6, 121.3, 103.0, 80.9, 47.2, 41.1, 39.0, 36.2, 30.8, 29.0.

**HRMS (ESI)** calcd for [C<sub>31</sub>H<sub>31</sub>BrINNaO<sub>3</sub>]<sup>+</sup>, *m/z*: 694.0424, found: 694.0427.

**HPLC analysis:** Daicel Chiralpak AD-H, hexane/isopropyl alcohol = 75/25, flow rate = 1.0 mL/min, UV = 210 nm, *t<sub>R</sub>* = 10.4 min (minor), *t<sub>R</sub>* = 12.2 min (major).

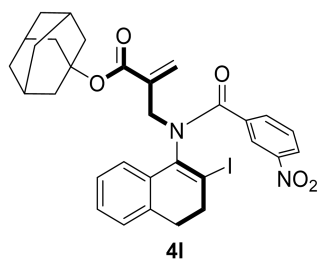

**adamantan-1-yl 2-((*N*-(2-iodo-3,4-dihydronaphthalen-1-yl)-3-nitrobenzamido)methyl)acrylate (4l)**

According to the general procedure, **4l** was obtained in 95% yield and 95.0:5.0 er as a white solid.

**Specific rotation** [ $\alpha$ ]<sup>25</sup><sub>D</sub> = +61.1 (*c* = 0.5, CH<sub>2</sub>Cl<sub>2</sub>)

**<sup>1</sup>H NMR (400 MHz, CDCl<sub>3</sub>)** δ 8.43 (t, *J* = 1.9 Hz, 1H), 8.18 – 8.10 (m, 1H), 7.81 (d, *J* = 7.9 Hz, 1H), 7.35 (t, *J* = 8.0 Hz, 1H), 7.28 (s, 1H), 7.27 – 7.21 (m, 2H), 7.16 – 7.06 (m, 1H), 6.39 (d, *J* = 1.7 Hz, 1H), 6.10 (d, *J* = 1.6 Hz, 1H), 4.71 (d, *J* = 14.1 Hz, 1H), 4.57 (d, *J* = 14.1 Hz, 1H), 2.95 – 2.79 (m, 2H), 2.77 – 2.49 (m, 2H), 2.13 (s, 3H), 2.03 (d, *J* = 3.1 Hz, 6H), 1.63 (t, *J* = 3.0 Hz, 6H).

**<sup>13</sup>C NMR (101 MHz, CDCl<sub>3</sub>)** δ 167.9, 165.0, 147.2, 142.4, 137.7, 136.4, 135.9, 133.4, 131.9, 131.0, 128.8, 128.4, 128.0, 127.2, 124.9, 123.5, 123.3, 103.6, 81.0, 47.2, 41.2, 39.0, 36.2, 30.8, 29.0.

**HRMS (ESI)** calcd for [C<sub>31</sub>H<sub>32</sub>IN<sub>2</sub>O<sub>5</sub>]<sup>+</sup>, *m/z*: 639.1350, found: 639.1352.

**HPLC analysis:** Daicel Chiralpak IC, hexane/isopropyl alcohol = 75/25, flow rate = 1.0 mL/min, UV = 210 nm,  $t_R$  = 23.8 min (minor),  $t_R$  = 27.5 min (major).

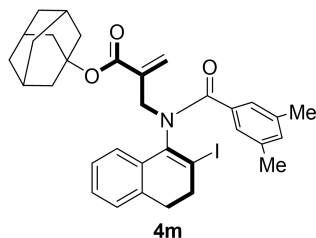

**adamantan-1-yl 2-((N-(2-iodo-3,4-dihydronaphthalen-1-yl)-3,5-dimethylbenzamido)methyl)acrylate (4m)**

According to the general procedure, **4m** was obtained in 65% yield and 96.5:3.5 er as a white solid.

**Specific rotation**  $[\alpha]^{25}_D = +72.4$  ( $c = 0.5$ ,  $\text{CH}_2\text{Cl}_2$ )

**$^1\text{H NMR}$  (400 MHz,  $\text{CDCl}_3$ )**  $\delta$  7.36 – 7.24 (m, 2H), 7.23 – 7.15 (m, 2H), 7.06 (d,  $J = 6.8$  Hz, 2H), 6.89 (s, 1H), 6.38 (d,  $J = 1.7$  Hz, 1H), 6.10 (d,  $J = 1.7$  Hz, 1H), 4.60 (q,  $J = 14.6$  Hz, 2H), 2.89 – 2.65 (m, 3H), 2.58 – 2.47 (m, 1H), 2.12 (s, 9H), 2.03 (d,  $J = 3.0$  Hz, 6H), 1.62 (d,  $J = 3.1$  Hz, 6H).

**$^{13}\text{C NMR}$  (101 MHz,  $\text{CDCl}_3$ )**  $\delta$  171.0, 165.2, 143.6, 136.9, 136.6, 135.9, 135.7, 132.9, 131.7, 130.1, 128.2, 127.5, 126.8, 125.5, 123.9, 102.3, 80.8, 47.3, 41.1, 39.1, 36.2, 30.8, 29.1, 21.1.

**HRMS (ESI)** calcd for  $[\text{C}_{33}\text{H}_{36}\text{INaO}_3]^+$ ,  $m/z$ : 644.1632, found: 644.1626.

**HPLC analysis:** Daicel Chiralpak OD-H, hexane/isopropyl alcohol = 75/25, flow rate = 1.0 mL/min, UV = 210 nm,  $t_R$  = 4.3 min (major),  $t_R$  = 5.7 min (minor).

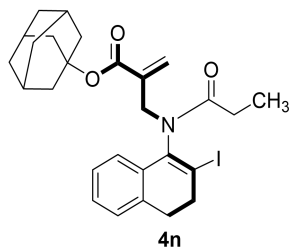

**adamantan-1-yl 2-((N-(2-iodo-3,4-dihydronaphthalen-1-yl)propionamido)methyl)acrylate (4n)**

According to the general procedure, **4n** was obtained in 41% yield and 84.0:16.0 er as a white solid.

**Specific rotation**  $[\alpha]^{25}_D = +50.7$  ( $c = 0.5$ ,  $\text{CH}_2\text{Cl}_2$ )

**$^1\text{H NMR}$  (400 MHz,  $\text{CDCl}_3$ )**  $\delta$  7.26 – 7.07 (m, 3H), 6.97 (d,  $J = 7.8$  Hz, 1H), 6.23 (d,  $J = 1.8$  Hz, 1H), 5.92 (d,  $J = 1.8$  Hz, 1H), 4.52 (d,  $J = 13.9$  Hz, 1H), 4.36 (d,  $J = 13.9$  Hz, 1H), 3.02 (q,  $J = 2.9$ , 2.5 Hz, 2H), 2.10 (s, 3H), 1.96 (d,  $J = 2.9$  Hz, 6H), 1.61 (t,  $J = 3.0$  Hz, 6H), 1.11 (t,  $J = 7.4$  Hz, 3H).

**$^{13}\text{C NMR}$  (101 MHz,  $\text{CDCl}_3$ )**  $\delta$  173.8, 165.1, 142.5, 137.3, 135.6, 131.9, 130.5, 128.4, 127.7, 127.1, 123.1, 103.8, 80.6, 46.2, 41.1, 38.8, 36.2, 30.8, 29.4, 27.1, 9.4.

**HRMS (ESI)** calcd for  $[\text{C}_{27}\text{H}_{32}\text{INaO}_3]^+$ ,  $m/z$ : 568.1319, found: 568.1313.

**HPLC analysis:** Daicel Chiralpak IC, hexane/isopropyl alcohol = 75/25, flow rate = 1.0 mL/min, UV = 210 nm,  $t_R$  = 14.2 min (minor),  $t_R$  = 18.9 min (major).

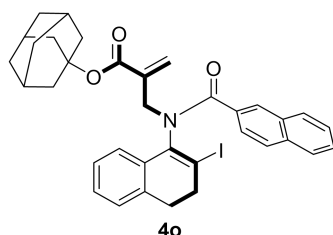

**adamantan-1-yl 2-((*N*-(2-iodo-3,4-dihydronaphthalen-1-yl)-2-naphthamido)methyl)acrylate (**4o**)**

According to the general procedure, **4o** was obtained in 73% yield and 98.0:2.0 er as a white solid.

**Specific rotation**  $[\alpha]^{25}_D = +68.4$  ( $c = 0.5$ ,  $\text{CH}_2\text{Cl}_2$ )

**$^1\text{H NMR}$  (400 MHz,  $\text{CDCl}_3$ )**  $\delta$  8.04 (s, 1H), 7.71 (d,  $J = 8.0$  Hz, 1H), 7.60 (d,  $J = 6.2$  Hz, 3H), 7.45 – 7.34 (m, 3H), 7.27 (d,  $J = 6.6$  Hz, 1H), 7.20 (t,  $J = 6.8$  Hz, 1H), 7.05 (d,  $J = 7.3$  Hz, 1H), 6.40 (d,  $J = 1.7$  Hz, 1H), 6.15 (d,  $J = 1.6$  Hz, 1H), 4.71 (d,  $J = 14.4$  Hz, 1H), 4.61 (d,  $J = 14.4$  Hz, 1H), 2.89 – 2.72 (m, 2H), 2.69 – 2.56 (m, 1H), 2.53 – 2.42 (m, 1H), 2.12 (s, 3H), 2.05 (d,  $J = 3.0$  Hz, 6H), 1.62 (d,  $J = 3.0$  Hz, 6H).

**$^{13}\text{C NMR}$  (101 MHz,  $\text{CDCl}_3$ )**  $\delta$  170.6, 165.3, 143.3, 136.8, 135.9, 134.0, 133.4, 132.6, 132.0, 130.4, 128.8, 128.4, 128.1, 127.8, 127.5, 127.1, 127.1, 126.9, 126.1, 125.1, 123.9, 103.0, 80.8, 47.3, 41.2, 39.0, 36.2, 30.8, 29.1.

**HRMS (ESI)** calcd for  $[\text{C}_{35}\text{H}_{34}\text{INNaO}_3]^+$ ,  $m/z$ : 666.1476, found: 666.1482.

**HPLC analysis:** Daicel Chiralpak IC, hexane/isopropyl alcohol = 60/40, flow rate = 1.0 mL/min, UV = 210 nm,  $t_R = 17.5$  min (major),  $t_R = 20.5$  min (minor).

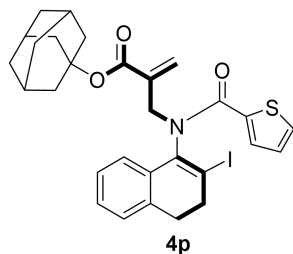

**adamantan-1-yl 2-((*N*-(2-iodo-3,4-dihydronaphthalen-1-yl)thiophene-2-carboxamido)methyl)acrylate (**4p**)**

According to the general procedure, **4p** was obtained in 93% yield and 86.5:13.5 er as a white solid.

**Specific rotation**  $[\alpha]^{25}_D = -28.8$  ( $c = 0.5$ ,  $\text{CH}_2\text{Cl}_2$ )

**$^1\text{H NMR}$  (400 MHz,  $\text{CDCl}_3$ )**  $\delta$  7.51 (d,  $J = 4.4$  Hz, 1H), 7.33 (d,  $J = 4.9$  Hz, 1H), 7.24 – 7.19 (m, 1H), 7.18 – 7.09 (m, 3H), 6.88 (dd,  $J = 5.0, 3.8$  Hz, 1H), 6.30 (d,  $J = 1.8$  Hz, 1H), 6.06 (d,  $J = 1.7$  Hz, 1H), 4.64 – 4.52 (m, 2H), 3.15 – 2.87 (m, 3H), 2.82 – 2.69 (m, 1H), 2.12 (s, 3H), 2.01 (d,  $J = 3.0$  Hz, 6H), 1.62 (t,  $J = 3.1$  Hz, 6H).

**$^{13}\text{C NMR}$  (101 MHz,  $\text{CDCl}_3$ )**  $\delta$  165.1, 162.6, 142.5, 137.0, 136.7, 135.8, 132.2, 131.9, 130.9, 130.8, 128.5, 127.8, 127.1, 126.6, 123.9, 105.5, 100.0, 80.7, 47.5, 41.1, 39.2, 36.2, 30.8, 29.2.

**HRMS (ESI)** calcd for  $[\text{C}_{29}\text{H}_{30}\text{INNaO}_3\text{S}]^+$ ,  $m/z$ : 622.0883, found: 622.0880.

**HPLC analysis:** Daicel Chiralpak AS, hexane/isopropyl alcohol = 75/25, flow rate = 1.0 mL/min, UV = 210 nm,  $t_R = 5.5$  min (major),  $t_R = 7.7$  min (minor).

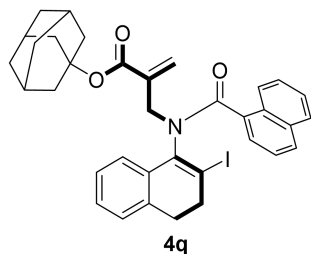

**adamantan-1-yl 2-((*N*-(2-iodo-3,4-dihydronaphthalen-1-yl)-1-naphthamido)methyl)acrylate (**4q**)**

According to the general procedure, **4q** was obtained in 67% yield and 99.0:1.0 er as a white solid.

**Specific rotation**  $[\alpha]^{25}_D = +20.0$  ( $c = 0.5$ ,  $\text{CH}_2\text{Cl}_2$ )

**<sup>1</sup>H NMR (400 MHz, CDCl<sub>3</sub>)** δ 8.30 (d, *J* = 8.4 Hz, 1H), 7.91 (dd, *J* = 13.4, 8.3 Hz, 1H), 7.66 (d, *J* = 8.1 Hz, 2H), 7.46 – 7.35 (m, 3H), 7.12 (d, *J* = 7.7 Hz, 1H), 6.97 (dd, *J* = 5.3, 3.4 Hz, 2H), 6.90 – 6.80 (m, 1H), 6.47 (d, *J* = 1.8 Hz, 1H), 6.25 (d, *J* = 1.7 Hz, 1H), 4.91 (d, *J* = 14.2 Hz, 1H), 4.79 (d, *J* = 14.2 Hz, 1H), 2.81 (td, *J* = 10.9, 5.5 Hz, 1H), 2.76 – 2.66 (m, 1H), 2.56 (dt, *J* = 14.1, 6.9 Hz, 1H), 2.43 – 2.35 (m, 1H), 2.10 (s, 3H), 2.00 (d, *J* = 2.9 Hz, 6H), 1.61 (d, *J* = 3.0 Hz, 6H).

**<sup>13</sup>C NMR (101 MHz, CDCl<sub>3</sub>)** δ 169.9, 165.2, 143.5, 137.4, 135.3, 133.5, 132.8, 132.6, 131.0, 130.8, 130.0, 128.0, 127.9, 127.2, 127.1, 126.6, 126.2, 125.8, 124.0, 123.9, 123.4, 102.2, 80.9, 47.2, 41.1, 39.2, 36.1, 30.8, 29.1.

**HRMS (ESI)** calcd for [C<sub>35</sub>H<sub>34</sub>INNaO<sub>3</sub>]<sup>+</sup>, *m/z*: 666.1476, found: 666.1479.

**HPLC analysis:** Daicel Chiralpak OD-H, hexane/isopropyl alcohol = 75/25, flow rate = 1.0 mL/min, UV = 210 nm, *t<sub>R</sub>* = 5.7 min (major), *t<sub>R</sub>* = 6.8 min (minor).

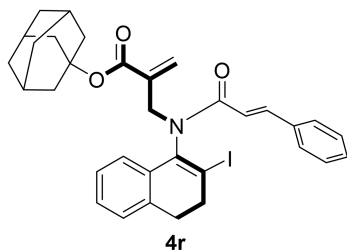

**adamantan-1-yl 2-((*N*-(2-iodo-3,4-dihydronaphthalen-1-yl)cinnamamido)methyl)acrylate (**4r**)**

According to the general procedure, **4r** was obtained in 75% yield and 78.0:22.0 er as a white solid.

**Specific rotation** [ $\alpha$ ]<sup>25</sup><sub>D</sub> = -19.6 (*c* = 0.5, CH<sub>2</sub>Cl<sub>2</sub>)

**<sup>1</sup>H NMR (400 MHz, CDCl<sub>3</sub>)** δ 7.82 (d, *J* = 15.4 Hz, 1H), 7.36 (dd, *J* = 6.5, 3.1 Hz, 2H), 7.32 – 7.27 (m, 3H), 7.25 – 7.11 (m, 3H), 7.04 (d, *J* = 7.7 Hz, 1H), 6.44 (d, *J* = 15.4 Hz, 1H), 6.25 (d, *J* = 1.8 Hz, 1H), 5.97 (d, *J* = 1.7 Hz, 1H), 4.53 (s, 2H), 3.24 – 2.96 (m, 3H), 2.86 – 2.68 (m, 1H), 2.12 (s, 3H), 2.01 (d, *J* = 2.9 Hz, 6H), 1.62 (t, *J* = 3.0 Hz, 6H).

**<sup>13</sup>C NMR (101 MHz, CDCl<sub>3</sub>)** δ 166.3, 165.1, 143.3, 142.0, 137.1, 135.7, 135.3, 132.2, 130.4, 129.6, 128.7, 128.5, 128.0, 127.6, 127.2, 123.3, 118.5, 104.2, 80.8, 46.2, 41.1, 39.0, 36.2, 30.8, 29.5.

**HRMS (ESI)** calcd for [C<sub>33</sub>H<sub>34</sub>INNaO<sub>3</sub>]<sup>+</sup>, *m/z*: 642.1476, found: 642.1486.

**HPLC analysis:** Daicel Chiralpak IC, hexane/isopropyl alcohol = 75/25, flow rate = 1.0 mL/min, UV = 210 nm, *t<sub>R</sub>* = 13.6 min (minor), *t<sub>R</sub>* = 18.6 min (major).

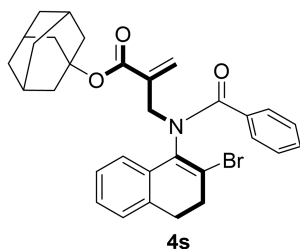

**adamantan-1-yl 2-((*N*-(2-bromo-3,4-dihydronaphthalen-1-yl)benzamido)methyl)acrylate (**4s**)**

According to the general procedure, **4s** was obtained in 74% yield and 91.0:9.0 er as a white solid.

**Specific rotation** [ $\alpha$ ]<sup>25</sup><sub>D</sub> = +45.3 (*c* = 0.5, CH<sub>2</sub>Cl<sub>2</sub>)

**<sup>1</sup>H NMR (400 MHz, CDCl<sub>3</sub>)** δ 7.50 – 7.45 (m, 2H), 7.30 (dd, *J* = 12.6, 7.5 Hz, 2H), 7.26 – 7.20 (m, 2H), 7.15 (t, *J* = 7.7 Hz, 2H), 7.09 (d, *J* = 7.2 Hz, 1H), 6.34 (d, *J* = 1.6 Hz, 1H), 6.05 (d, *J* = 1.6 Hz, 1H), 4.74 (d, *J* = 14.5 Hz, 1H), 4.44 (d, *J* = 14.5 Hz, 1H), 2.99 – 2.81 (m, 1H), 2.75 – 2.51 (m, 3H), 2.13 (s, 3H), 2.05 (d, *J* = 2.6 Hz, 6H), 1.62 (s, 6H).



$^{13}\text{C}$  NMR (101 MHz,  $\text{CDCl}_3$ )  $\delta$  170.9, 165.2, 137.7, 136.8, 136.2, 135.3, 132.5, 130.1, 129.8, 128.2, 127.8, 127.3, 127.3, 127.1, 124.8, 123.6, 80.8, 46.9, 41.1, 36.2, 34.4, 30.8, 28.6.

**HRMS (ESI)** calcd for  $[\text{C}_{31}\text{H}_{32}\text{BrNNaO}_3]^+$ ,  $m/z$ : 568.1458 found: 568.1459.

**HPLC analysis:** Daicel Chiralpak OD-H, hexane/isopropyl alcohol = 15/1, flow rate = 1.0 mL/min, UV = 210 nm,  $t_R$  = 8.2 min (major),  $t_R$  = 11.9 min (minor).

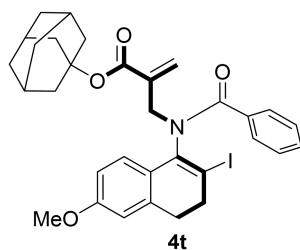

**adamantan-1-yl 2-((N-(2-iodo-6-methoxy-3,4-dihydronaphthalen-1-yl)benzamido)methyl)acrylate (4t)**

According to the general procedure, **4t** was obtained in 94% yield and 98.0:2.0 er as a white solid.

**Specific rotation**  $[\alpha]^{25}_D = +58.8$  ( $c = 0.5$ ,  $\text{CH}_2\text{Cl}_2$ )

$^1\text{H}$  NMR (400 MHz,  $\text{CDCl}_3$ )  $\delta$  7.52 (d,  $J = 8.0$  Hz, 2H), 7.30 (d,  $J = 7.9$  Hz, 1H), 7.24 (d,  $J = 8.6$  Hz, 1H), 7.16 (t,  $J = 7.4$  Hz, 2H), 6.74 (d,  $J = 8.6$  Hz, 1H), 6.65 (s, 1H), 6.36 (d,  $J = 1.5$  Hz, 1H), 6.09 (s, 1H), 4.65 (d,  $J = 14.4$  Hz, 1H), 4.52 (d,  $J = 14.4$  Hz, 1H), 3.80 (s, 3H), 2.88 – 2.74 (m, 2H), 2.65 (ddd,  $J = 16.9, 12.3, 5.8$  Hz, 1H), 2.52 (dt,  $J = 15.0, 6.7$  Hz, 1H), 2.13 (s, 3H), 2.05 (d,  $J = 2.8$  Hz, 6H), 1.64 (t,  $J = 2.9$  Hz, 6H).

$^{13}\text{C}$  NMR (101 MHz,  $\text{CDCl}_3$ )  $\delta$  170.5, 165.2, 159.5, 142.8, 137.9, 136.8, 136.2, 130.2, 130.2, 127.8, 127.2, 125.7, 125.4, 114.0, 111.5, 99.0, 80.8, 55.3, 47.1, 41.2, 38.8, 36.2, 30.8, 29.5.

**HRMS (ESI)** calcd for  $[\text{C}_{32}\text{H}_{34}\text{INNaO}_4]^+$ ,  $m/z$ : 646.1425 found: 646.1440.

**HPLC analysis:** Daicel Chiralpak AD-H, hexane/isopropyl alcohol = 75/25, flow rate = 1.0 mL/min, UV = 210 nm,  $t_R$  = 15.0 min (minor),  $t_R$  = 18.3 min (major).

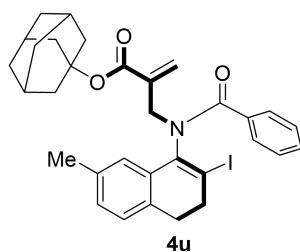

**adamantan-1-yl 2-((N-(7-methyl-2-iodo-3,4-dihydronaphthalen-1-yl)benzamido)methyl)acrylate (4u)**

According to the general procedure, **4u** was obtained in 57% yield and 89.5:10.5 er as a white solid.

**Specific rotation**  $[\alpha]^{25}_D = +61.6$  ( $c = 0.5$ ,  $\text{CH}_2\text{Cl}_2$ )

$^1\text{H}$  NMR (400 MHz,  $\text{CDCl}_3$ )  $\delta$  7.51 (d,  $J = 7.1$  Hz, 2H), 7.29 (d,  $J = 7.4$  Hz, 1H), 7.16 (t,  $J = 7.7$  Hz, 2H), 7.11 (s, 1H), 7.00 (q,  $J = 7.6$  Hz, 2H), 6.38 (d,  $J = 1.7$  Hz, 1H), 6.12 (d,  $J = 1.7$  Hz, 1H), 4.73 (d,  $J = 14.4$  Hz, 1H), 4.46 (d,  $J = 14.4$  Hz, 1H), 2.88 – 2.74 (m, 2H), 2.73 – 2.60 (m, 1H), 2.57 – 2.46 (m, 1H), 2.33 (s, 3H), 2.12 (s, 3H), 2.03 (d,  $J = 2.9$  Hz, 6H), 1.62 (t,  $J = 3.0$  Hz, 6H).

$^{13}\text{C}$  NMR (101 MHz,  $\text{CDCl}_3$ )  $\delta$  170.5, 165.2, 143.1, 136.9, 136.5, 136.2, 133.0, 132.2, 130.3, 130.2, 128.9, 127.8, 127.6, 127.2, 124.5, 102.7, 80.7, 47.1, 41.1, 39.2, 36.2, 30.8, 28.7, 21.4.

**HRMS (ESI)** calcd for  $[\text{C}_{32}\text{H}_{34}\text{INNaO}_3]^+$ ,  $m/z$ : 630.1476, found: 630.1472.

**HPLC analysis:** Daicel Chiralpak IC, hexane/isopropyl alcohol = 75/25, flow rate = 1.0 mL/min, UV = 210 nm,  $t_R$  = 13.5 min (major),  $t_R$  = 14.8 min (minor).

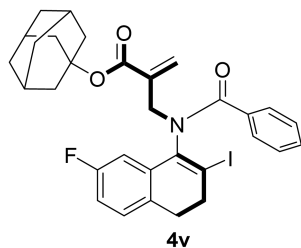

**adamantan-1-yl 2-((N-(7-fluoro-2-iodo-3,4-dihydronaphthalen-1-yl)benzamido)methyl)acrylate (4v)**

According to the general procedure, **4v** was obtained in 91% yield and 95.5:4.5 er as a white solid.

**Specific rotation**  $[\alpha]^{25}_D = +73.7$  ( $c = 0.5$ ,  $\text{CH}_2\text{Cl}_2$ )

**$^1\text{H}$  NMR (400 MHz,  $\text{CDCl}_3$ )**  $\delta$  7.52 – 7.45 (m, 2H), 7.29 (d,  $J = 7.4$  Hz, 1H), 7.17 (t,  $J = 7.6$  Hz, 2H), 7.06 – 6.98 (m, 2H), 6.88 (td,  $J = 8.3, 2.6$  Hz, 1H), 6.39 (d,  $J = 1.7$  Hz, 1H), 6.14 (d,  $J = 1.6$  Hz, 1H), 4.61 (s, 2H), 2.89 – 2.81 (m, 1H), 2.80 – 2.66 (m, 2H), 2.59 – 2.46 (m, 1H), 2.13 (s, 3H), 2.04 (d,  $J = 2.9$  Hz, 6H), 1.62 (d,  $J = 3.0$  Hz, 6H).

**$^{13}\text{C}$  NMR (101 MHz,  $\text{CDCl}_3$ )**  $\delta$  170.5, 165.2, 161.8 (d,  $J = 243.9$  Hz), 142.6, 136.8, 136.0, 134.3 (d,  $J = 7.4$  Hz), 131.3 (d,  $J = 3.1$  Hz), 130.7, 130.3, 129.0 (d,  $J = 7.9$  Hz), 127.6, 127.3, 114.8 (d,  $J = 21.4$  Hz), 111.1 (d,  $J = 24.0$  Hz), 104.3, 80.9, 47.0, 41.1, 39.2, 36.2, 30.8, 28.2.

**$^{19}\text{F}$  NMR (376 MHz,  $\text{CDCl}_3$ )**  $\delta$  -114.73.

**HRMS (ESI)** calcd for  $[\text{C}_{31}\text{H}_{31}\text{FINNaO}_3]^+$ ,  $m/z$ : 634.1225 found: 634.1214.

**HPLC analysis:** Daicel Chiralpak IC, hexane/isopropyl alcohol = 75/25, flow rate = 1.0 mL/min, UV = 210 nm,  $t_R = 13.8$  min (major),  $t_R = 21.8$  min (minor).

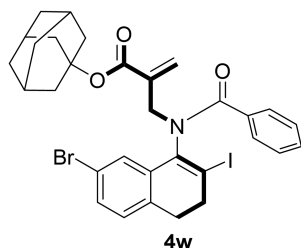

**adamantan-1-yl 2-((N-(7-bromo-2-iodo-3,4-dihydronaphthalen-1-yl)benzamido)methyl)acrylate (4w)**

According to the general procedure, **4w** was obtained in 87% yield and 95.0:5.0 er as a white solid.

**Specific rotation**  $[\alpha]^{25}_D = +52.3$  ( $c = 0.5$ ,  $\text{CH}_2\text{Cl}_2$ )

**$^1\text{H}$  NMR (400 MHz,  $\text{CDCl}_3$ )**  $\delta$  7.50 – 7.45 (m, 2H), 7.41 (d,  $J = 1.8$  Hz, 1H), 7.33 – 7.27 (m, 2H), 7.18 (t,  $J = 7.6$  Hz, 2H), 6.95 (d,  $J = 8.0$  Hz, 1H), 6.41 (d,  $J = 1.7$  Hz, 1H), 6.19 (d,  $J = 1.6$  Hz, 1H), 4.66 (d,  $J = 14.3$  Hz, 1H), 4.54 (d,  $J = 14.2$  Hz, 1H), 2.89 – 2.66 (m, 3H), 2.57 – 2.45 (m, 1H), 2.12 (s, 3H), 2.03 (d,  $J = 2.9$  Hz, 6H), 1.63 (d,  $J = 3.1$  Hz, 6H).

**$^{13}\text{C}$  NMR (101 MHz,  $\text{CDCl}_3$ )**  $\delta$  170.4, 165.2, 142.2, 136.8, 135.9, 134.7, 134.3, 131.0, 130.8, 130.3, 129.3, 127.6, 127.4, 126.7, 120.6, 104.2, 80.9, 47.0, 41.1, 38.8, 36.2, 30.8, 28.5.

**HRMS (ESI)** calcd for  $[\text{C}_{31}\text{H}_{31}\text{BrINNaO}_3]^+$ ,  $m/z$ : 694.0424 found: 694.0412.

**HPLC analysis:** Daicel Chiralpak IC, hexane/isopropyl alcohol = 75/25, flow rate = 1.0 mL/min, UV = 210 nm,  $t_R = 12.2$  min (major),  $t_R = 16.6$  min (minor).

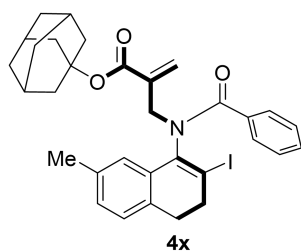

**adamantan-1-yl 2-((N-(2-iodo-7-nitro-3,4-dihydronaphthalen-1-yl)benzamido)methyl)acrylate (4x)**

According to the general procedure, **4x** was obtained in 98% yield and 94.0:6.0 er as a white solid.

**Specific rotation**  $[\alpha]^{25}_D = +32.1$  ( $c = 0.5$ ,  $\text{CH}_2\text{Cl}_2$ )

**$^1\text{H NMR}$  (400 MHz,  $\text{CDCl}_3$ )**  $\delta$  8.13 (d,  $J = 2.1$  Hz, 1H), 8.04 (dd,  $J = 8.2, 2.1$  Hz, 1H), 7.46 (d,  $J = 7.3$  Hz, 2H), 7.29 (d,  $J = 7.5$  Hz, 1H), 7.23 (d,  $J = 8.3$  Hz, 1H), 7.16 (t,  $J = 7.7$  Hz, 2H), 6.45 (d,  $J = 1.6$  Hz, 1H), 6.30 (d,  $J = 1.6$  Hz, 1H), 4.68 (d,  $J = 14.2$  Hz, 1H), 4.58 (d,  $J = 14.3$  Hz, 1H), 2.99 – 2.89 (m, 2H), 2.79 (dt,  $J = 12.2, 6.2$  Hz, 1H), 2.67 (td,  $J = 13.7, 8.4$  Hz, 1H), 2.10 (s, 3H), 1.95 (d,  $J = 2.8$  Hz, 6H), 1.60 (t,  $J = 3.2$  Hz, 6H).

**$^{13}\text{C NMR}$  (101 MHz,  $\text{CDCl}_3$ )**  $\delta$  170.4, 165.3, 147.2, 143.0, 142.2, 136.7, 135.8, 133.8, 131.2, 130.4, 128.6, 127.5, 122.9, 118.6, 105.4, 80.9, 46.9, 41.1, 38.4, 36.1, 30.8, 29.0.

**HRMS (ESI)** calcd for  $[\text{C}_{31}\text{H}_{32}\text{IN}_2\text{O}_5]^+$ ,  $m/z$ : 639.1350 found: 639.1348.

**HPLC analysis:** Daicel Chiralpak AS, hexane/isopropyl alcohol = 75/25, flow rate = 1.0 mL/min, UV = 210 nm,  $t_R = 6.6$  min (major),  $t_R = 9.2$  min (minor).

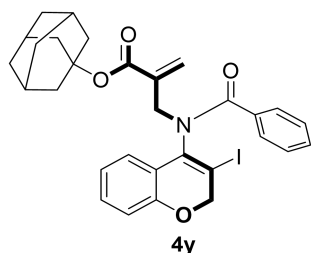

**adamantan-1-yl 2-((N-(3-iodo-2H-chromen-4-yl)benzamido)methyl)acrylate (4y)**

According to the general procedure, **4y** was obtained in 95% yield and 95.5:4.5 er as a white solid.

**Specific rotation**  $[\alpha]^{25}_D = +16.0$  ( $c = 0.5$ ,  $\text{CH}_2\text{Cl}_2$ )

**$^1\text{H NMR}$  (400 MHz,  $\text{CDCl}_3$ )**  $\delta$  7.56 – 7.50 (m, 2H), 7.31 (t,  $J = 7.4$  Hz, 1H), 7.26 – 7.15 (m, 4H), 6.99 (t,  $J = 7.6$  Hz, 1H), 6.81 (d,  $J = 7.5$  Hz, 1H), 6.39 (d,  $J = 1.7$  Hz, 1H), 6.12 (d,  $J = 1.6$  Hz, 1H), 4.84 (d,  $J = 14.5$  Hz, 1H), 4.67 (dd,  $J = 30.6, 14.4$  Hz, 2H), 4.49 (d,  $J = 14.3$  Hz, 1H), 2.12 (s, 3H), 2.06 – 1.98 (m, 6H), 1.63 (t,  $J = 3.0$  Hz, 6H).

**$^{13}\text{C NMR}$  (101 MHz,  $\text{CDCl}_3$ )**  $\delta$  170.4, 165.0, 154.5, 141.4, 136.6, 135.7, 130.9, 130.6, 130.5, 127.8, 127.5, 123.9, 122.0, 121.5, 116.5, 92.0, 81.0, 74.8, 46.8, 41.0, 36.2, 30.8.

**HRMS (ESI)** calcd for  $[\text{C}_{30}\text{H}_{30}\text{INNaO}_4]^+$ ,  $m/z$ : 618.1112, found: 618.1104.

**HPLC analysis:** Daicel Chiralpak IC, hexane/isopropyl alcohol = 75/25, flow rate = 1.0 mL/min, UV = 210 nm,  $t_R = 22.5$  min (major),  $t_R = 26.2$  min (minor).

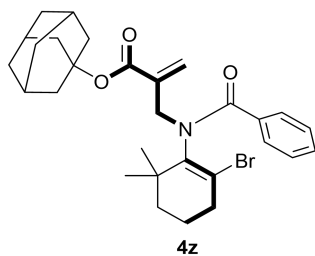

**adamantan-1-yl 2-((N-(2-bromo-6,6-dimethylcyclohex-1-en-1-yl)benzamido)methyl)acrylate (**4z**)**

According to the general procedure, **4z** was obtained in 37% yield and 77.0:23.0 er as a colorless oil at -10 °C.

**Specific rotation**  $[\alpha]^{25}_{\text{D}} = -9.6$  ( $c = 0.5$ ,  $\text{CH}_2\text{Cl}_2$ )

**$^1\text{H}$  NMR (400 MHz,  $\text{CDCl}_3$ )**  $\delta$  7.62 (d,  $J = 8.0$  Hz, 2H), 7.40 – 7.31 (m, 3H), 6.37 (s, 1H), 5.79 (s, 1H), 4.81 (d,  $J = 17.3$  Hz, 1H), 4.03 (d,  $J = 17.3$  Hz, 1H), 2.64 (t,  $J = 6.3$  Hz, 2H), 2.17 (s, 9H), 1.78 (d,  $J = 11.2$  Hz, 2H), 1.68 (s, 5H), 1.41 (dt,  $J = 8.5, 4.7$  Hz, 1H), 1.30 (d,  $J = 15.3$  Hz, 2H), 1.05 (s, 3H), 0.47 (s, 3H).

**$^{13}\text{C}$  NMR (101 MHz,  $\text{CDCl}_3$ )**  $\delta$  170.6, 165.2, 147.1, 137.0, 136.5, 130.0, 128.1, 127.7, 126.7, 125.1, 81.1, 52.7, 41.3, 39.5, 39.1, 37.0, 36.2, 30.9, 28.4, 27.5, 20.2.

**HRMS (ESI)** calcd for  $[\text{C}_{29}\text{H}_{36}\text{BrNNaO}_3]^+$ ,  $m/z$ : 548.1771 found: 548.1763.

**HPLC analysis:** Daicel Chiralpak IC, hexane/isopropyl alcohol = 75/25, flow rate = 1.0 mL/min, UV = 210 nm,  $t_{\text{R}} = 16.5$  min (minor),  $t_{\text{R}} = 20.5$  min (major).

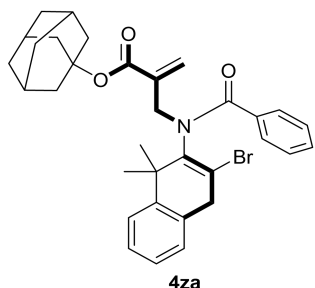

**adamantan-1-yl 2-((N-(3-bromo-1,1-dimethyl-1,4-dihydronaphthalen-2-yl)benzamido)methyl)acrylate (**4za**)**

According to the general procedure, **4za** was obtained in 77% yield and 90.5:9.5 er as a colorless oil at -10 °C.

**Specific rotation**  $[\alpha]^{25}_{\text{D}} = -38.5$  ( $c = 0.5$ ,  $\text{CH}_2\text{Cl}_2$ )

**$^1\text{H}$  NMR (400 MHz,  $\text{CDCl}_3$ )**  $\delta$  7.58 – 7.53 (m, 2H), 7.24 – 7.10 (m, 6H), 7.06 (d,  $J = 7.2$  Hz, 1H), 6.40 (d,  $J = 1.3$  Hz, 1H), 5.96 (d,  $J = 1.5$  Hz, 1H), 4.67 (d,  $J = 16.3$  Hz, 1H), 4.39 (d,  $J = 16.3$  Hz, 1H), 3.97 (d,  $J = 20.9$  Hz, 1H), 3.80 (d,  $J = 21.0$  Hz, 1H), 2.16 (s, 3H), 2.13 (d,  $J = 2.8$  Hz, 6H), 1.66 (d,  $J = 3.2$  Hz, 6H), 1.39 (s, 3H), 1.06 (s, 3H).

**$^{13}\text{C}$  NMR (101 MHz,  $\text{CDCl}_3$ )**  $\delta$  170.8, 165.3, 145.6, 144.1, 136.5, 136.2, 132.4, 130.2, 128.3, 128.1, 127.6, 127.3, 127.1, 126.1, 124.6, 123.9, 81.1, 51.0, 43.8, 41.3, 41.1, 36.2, 30.9, 29.7, 26.1.

**HRMS (ESI)** calcd for  $[\text{C}_{33}\text{H}_{37}\text{BrNO}_3]^+$ ,  $m/z$ : 574.1951 found: 574.1946.

**HPLC analysis:** Daicel Chiralpak AD-H, hexane/isopropyl alcohol = 90/10, flow rate = 1.0 mL/min, UV = 210 nm,  $t_{\text{R}} = 8.2$  min (major),  $t_{\text{R}} = 9.8$  min (minor).

## 4. Large Scale Experiment

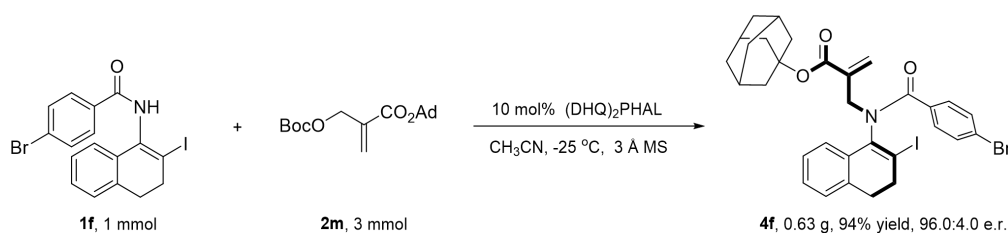

To a 100 mL round-bottom flask equipped with a magnetic stir bar was added achiral MBH carbonate **2m** (3 mmol), enamide **1f** (1 mmol) and 3 Å MS (400 mg). Then the solvent CH<sub>3</sub>CN (10 mL) was added. When the temperature of the mixture was decreased to -25 °C, bismichona alkaloid **3g** was added and the reaction mixture was stirred at -25 °C. Upon the reaction completed, the mixture was extracted with DCM and concentrated under reduced pressure. The resulting crude residue was purified *via* flash column chromatography on silica gel to afford the product **4f** (0.63 g, 94% yield, 96.0:4.0 e.r.).

## 5. Experimental Procedure for the Transformation of Axially Chiral Enamides

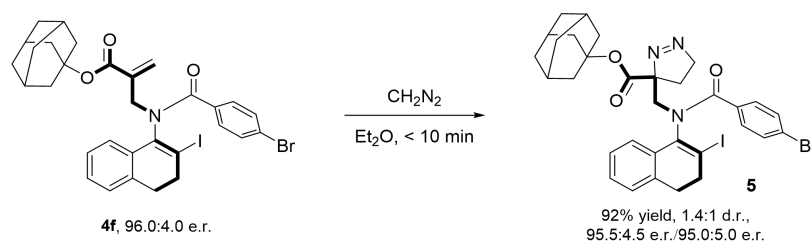

To a vial containing the compound **4f** (0.10 mmol) was added the freshly prepared CH<sub>2</sub>N<sub>2</sub> ether solution (1.0 mL). Then the reaction mixture was stirred at 25 °C for less than 10 min on a magnetic stirrer. Upon the reaction completed, the resulting crude residue was purified directly *via* column chromatography on silica gel to afford the desired product **5** as a white solid.

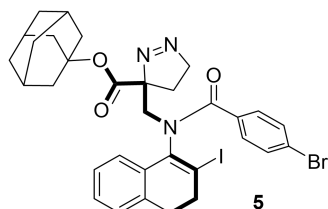

**adamantan-1-yl 3-((4-bromo-*N*-(2-iodo-3,4-dihydronaphthalen-1-yl)benzamido)methyl)-4,5-dihydro-3H-pyrazole-3-carboxylate (**5**)**

**Specific rotation**  $[\alpha]^{25}_D = +59.6$  ( $c = 0.5$ , CH<sub>2</sub>Cl<sub>2</sub>)

**<sup>1</sup>H NMR (400 MHz, CDCl<sub>3</sub>)**  $\delta$  7.41 – 7.26 (m, 7H), 7.20 (dd,  $J = 8.7, 5.1$  Hz, 1H), 5.38 – 4.58 (m, 2H), 4.58 – 3.75 (m, 2H), 3.36 – 2.66 (m, 3H), 2.66 – 2.07 (m, 7H), 1.96 (s, 5H), 1.63 (d,  $J = 26.0$  Hz, 6H).

**<sup>13</sup>C NMR (101 MHz, CDCl<sub>3</sub>)**  $\delta$  170.6, 166.8, 142.7, 137.3, 134.6, 131.6, 130.5, 129.6, 128.8, 127.2, 125.3, 123.8, 104.7, 100.5, 83.0, 79.6, 50.2, 40.9, 39.5, 36.0, 30.8, 28.9, 26.0, 25.4.

**HRMS (ESI)** calcd for  $[C_{32}H_{33}BrIN_3NaO_3]^+$ ,  $m/z$ : 736.0642 found: 736.0658.

**HPLC analysis:** Daicel Chiralpak IC, hexane/isopropyl alcohol = 50/50, flow rate = 1.0 mL/min, UV = 210 nm,  $t_R$  = 12.3 min (minor),  $t_R$  = 20.3 min (minor),  $t_R$  = 41.1 min (major),  $t_R$  = 51.4 min (major).

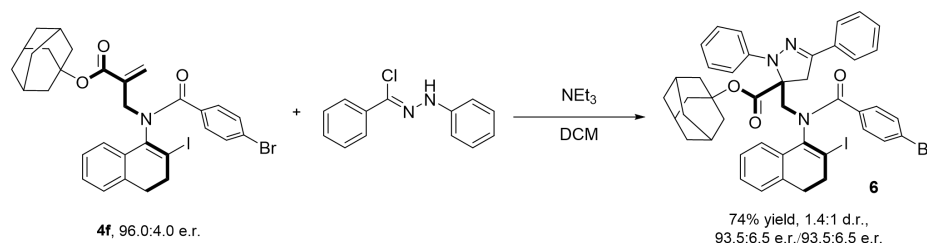

The compound **4f** (0.10 mmol) and nitrilimine (0.15 mmol, 1.5 equiv) were dissolved in dichloromethane (1.0 mL), and then  $Et_3N$  (0.15 mmol, 1.5 equiv) was added. After stirring at room temperature for 3 h, the mixture was purified by flash column chromatography on silica gel to furnish the desired product **6** as a white solid.<sup>10</sup>

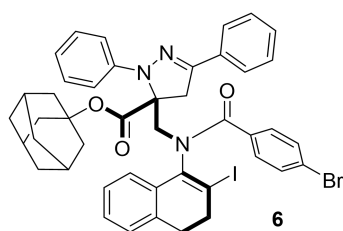

**adamantan-1-yl 5-((4-bromo-*N*-(2-iodo-3,4-dihydronaphthalen-1-yl)benzamido)methyl)-1,3-diphenyl-4,5-dihydro-1H-pyrazole-5-carboxylate (**6**)**

**Specific rotation**  $[\alpha]^{25}_D = -8.4$  ( $c = 0.5$ ,  $CH_2Cl_2$ )

**$^1H$  NMR (400 MHz,  $CDCl_3$ )**  $\delta$  7.71 (dd,  $J = 37.3, 8.4$  Hz, 2H), 7.43 – 7.33 (m, 5H), 7.29 – 7.17 (m, 4H), 7.05 (dd,  $J = 7.4, 2.7$  Hz, 1H), 6.97 – 6.62 (m, 6H), 5.17 (dd,  $J = 52.7, 15.3$  Hz, 1H), 4.61 – 4.21 (m, 1H), 4.20 – 4.03 (m, 1H), 3.67 (dd,  $J = 47.1, 17.8$  Hz, 1H), 2.63 – 1.98 (m, 7H), 1.93 - 1.76 (m, 6H), 1.53 (d,  $J = 19.5$  Hz, 6H).

**$^{13}C$  NMR (101 MHz,  $CDCl_3$ )**  $\delta$  171.1, 170.4, 147.7, 144.5, 142.7, 138.0, 134.5, 133.0, 131.8, 130.6, 130.4, 128.6, 128.5, 128.3, 128.0, 127.2, 126.0, 125.7, 124.8, 124.2, 119.8, 114.6, 104.5, 82.7, 72.7, 49.2, 44.6, 40.9, 39.4, 36.0, 30.8, 28.4.

**HRMS (ESI)** calcd for  $[C_{44}H_{41}BrIN_3NaO_3]^+$ ,  $m/z$ : 888.1268 found: 888.1274.

**HPLC analysis:** Daicel Chiralpak IC, hexane/isopropyl alcohol = 75/25, flow rate = 1.0 mL/min, UV = 210 nm,  $t_R$  = 4.9 min (major),  $t_R$  = 6.1 min (minor),  $t_R$  = 8.8 min (major),  $t_R$  = 9.7 min (minor).

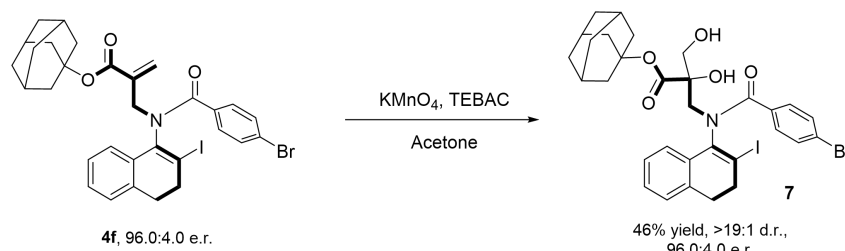

TEBAC (0.12 mmol, 1.2 equiv) and  $\text{KMnO}_4$  (0.12 mmol, 1.2 equiv) were mixed in acetone (1.0 mL), and the mixture was stirred at rt for 3 h then cooled to 0 °C. The compound **4f** (0.10 mmol) was added to the solution while the internal temperature was kept at 5 °C or below. After stirring for a further 30 min, the mixture was purified by flash column chromatography on silica gel to acquire the desired product **7** as a white solid.<sup>11</sup>

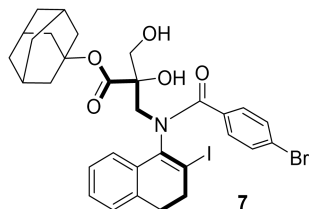

**adamantan-1-yl 3-(4-bromo-*N*-(2-iodo-3,4-dihydronaphthalen-1-yl)benzamido)-2-hydroxy-2-(hydroxymethyl)propanoate (7)**

**Specific rotation**  $[\alpha]^{25}_{\text{D}} = +23.7$  ( $c = 0.5$ ,  $\text{CH}_2\text{Cl}_2$ )

**$^1\text{H}$  NMR (400 MHz,  $\text{CDCl}_3$ )**  $\delta$  7.40 – 7.28 (m, 5H), 7.28 – 7.22 (m, 2H), 7.13 (d,  $J = 6.3$  Hz, 1H), 4.42 (s, 1H), 4.23 (d,  $J = 14.2$  Hz, 1H), 3.83 (d,  $J = 14.3$  Hz, 1H), 3.75 – 3.67 (m, 2H), 2.99 – 2.84 (m, 2H), 2.75 – 2.67 (m, 1H), 2.66 – 2.54 (m, 1H), 2.23 – 1.98 (m, 9H), 1.64 (s, 6H).

**$^{13}\text{C}$  NMR (101 MHz,  $\text{CDCl}_3$ )**  $\delta$  171.7, 143.2, 136.4, 134.2, 131.5, 130.6, 129.7, 128.8, 128.0, 127.1, 125.2, 124.0, 102.5, 83.1, 77.8, 66.7, 52.5, 41.0, 39.4, 36.1, 30.9, 28.9.

**HRMS (ESI)** calcd for  $[\text{C}_{31}\text{H}_{34}\text{BrINO}_5]^+$ ,  $m/z$ : 706.0660 found: 706.0677.

**HPLC analysis:** Daicel Chiralpak IF, hexane/isopropyl alcohol = 50/50, flow rate = 1.0 mL/min, UV = 210 nm,  $t_{\text{R}} = 12.4$  min (major),  $t_{\text{R}} = 15.0$  min (minor).

## 6. The Racemization Experiments

Barriers to racemization of **4c**

Fractions collected and racemized by incubation at 40 °C in isopropyl alcohol.

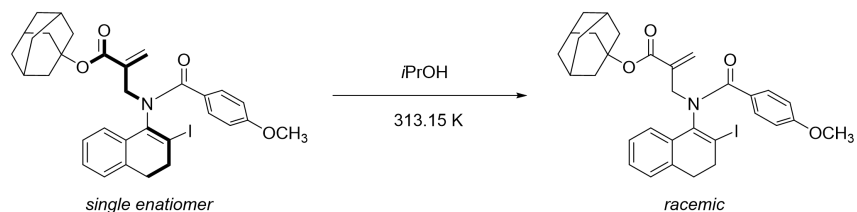

| t/(s) | er            | M/P     | (1+(M/P))/(1-(M/P)) | ln      |
|-------|---------------|---------|---------------------|---------|
| 0     | 91.212:8.788  | 0.09635 | 1.21324             | 0.19329 |
| 2100  | 84.818:15.182 | 0.17900 | 1.43604             | 0.32444 |
| 4200  | 79.686:20.314 | 0.25493 | 1.68430             | 0.44919 |
| 6300  | 75.683:24.317 | 0.32130 | 1.94681             | 0.57393 |
| 8400  | 71.879:28.121 | 0.39123 | 2.28530             | 0.69867 |

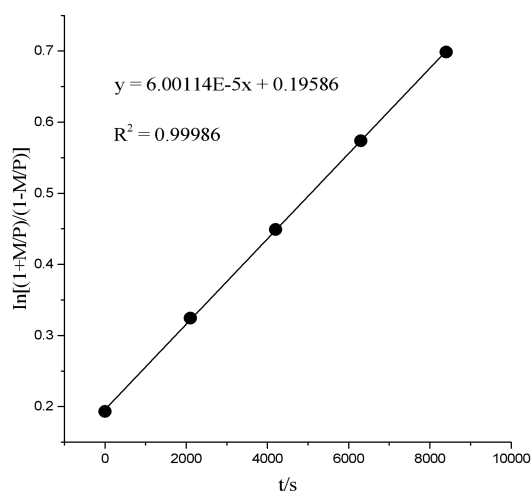

$$k_{ent} = \frac{1}{2} k_{rac}$$

$$k_{ent} = \frac{1}{2} slope = 3.00057 \times 10^{-5}$$

$$\Delta G_T^\ddagger = \ln \left( \frac{k_B T}{h \times k_{ent}} \right) RT = 103.97 \text{ kJ mol}^{-1}$$



### Barriers to racemization of **4d**

Fractions collected and racemized by incubation at 40 °C in isopropyl alcohol.

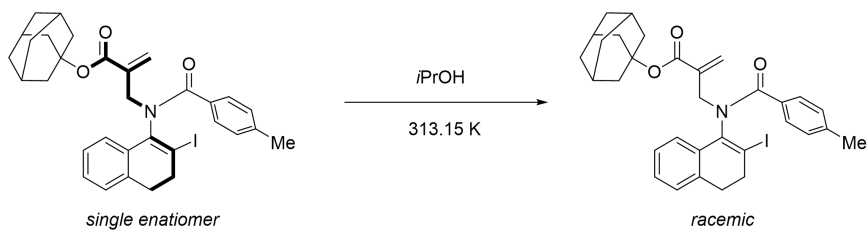

| t/(s) | er            | M/P     | $[1+(M/P)]/[1-(M/P)]$ | In      |
|-------|---------------|---------|-----------------------|---------|
| 0     | 93.670:6.330  | 0.06758 | 1.14495               | 0.13536 |
| 900   | 92.289:7.711  | 0.08355 | 1.18234               | 0.16750 |
| 1800  | 90.714:9.286  | 0.10237 | 1.22808               | 0.20545 |
| 2700  | 89.273:10.727 | 0.12016 | 1.27314               | 0.24149 |
| 3600  | 87.722:12.278 | 0.13996 | 1.32549               | 0.28178 |
| 4500  | 86.267:13.733 | 0.15919 | 1.37866               | 0.32111 |
| 5400  | 84.746:15.254 | 0.18000 | 1.43901               | 0.36396 |
| 6300  | 83.636:16.364 | 0.19566 | 1.48650               | 0.39643 |

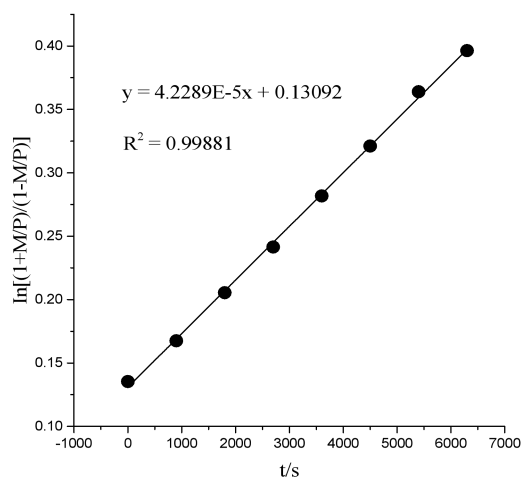

$$k_{ent} = \frac{1}{2} k_{rac}$$

$$k_{ent} = \frac{1}{2} slope = 2.11445 \times 10^{-5}$$

$$\Delta G_T^\ddagger = \ln \left( \frac{k_B T}{h \times k_{ent}} \right) RT = 104.85 \text{ kJ mol}^{-1}$$

### Barriers to racemization of **4f**

Fractions collected and racemized by incubation at 40 °C in isopropyl alcohol.

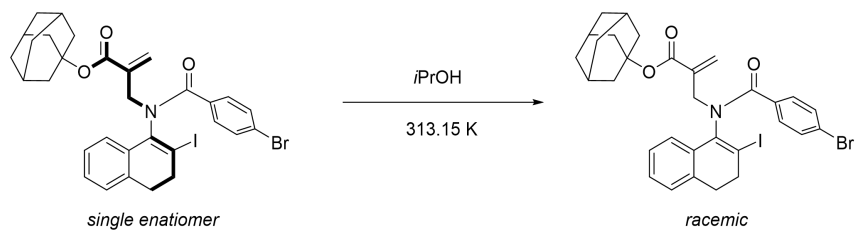

| t/(s) | er            | M/P     | $[1+(M/P)]/[1-(M/P)]$ | In      |
|-------|---------------|---------|-----------------------|---------|
| 0     | 93.031:6.969  | 0.07491 | 1.16195               | 0.15010 |
| 1800  | 91.731:8.269  | 0.09014 | 1.19815               | 0.18078 |
| 3600  | 90.046:9.954  | 0.11054 | 1.24856               | 0.22199 |
| 5400  | 88.524:11.476 | 0.12964 | 1.29789               | 0.26074 |
| 7200  | 87.062:12.938 | 0.14861 | 1.34909               | 0.29943 |
| 9000  | 85.792:14.208 | 0.16561 | 1.39696               | 0.33430 |
| 10800 | 84.336:15.664 | 0.18573 | 1.45620               | 0.37583 |

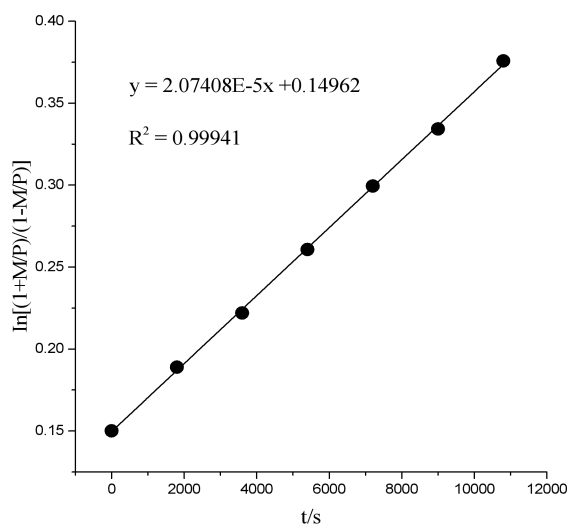

$$k_{ent} = \frac{1}{2} k_{rac}$$

$$k_{ent} = \frac{1}{2} \text{slope} = 1.03704 \times 10^{-5}$$

$$\Delta G_T^\ddagger = \ln \left( \frac{k_B T}{h \times k_{ent}} \right) RT = 106.71 \text{ kJ mol}^{-1}$$

## Barriers to racemization of **4i**

Fractions collected and racemized by incubation at 40 °C in isopropyl alcohol.

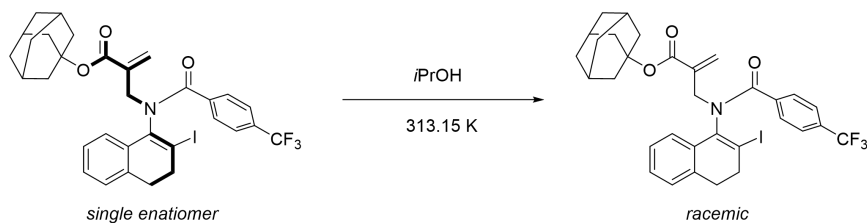

| t/(s) | er            | M/P     | $[1+(M/P)]/[1-(M/P)]$ | In      |
|-------|---------------|---------|-----------------------|---------|
| 0     | 94.603:5.397  | 0.05705 | 1.12100               | 0.11422 |
| 1200  | 93.853:6.147  | 0.06550 | 1.14017               | 0.13118 |
| 2400  | 93.009:6.991  | 0.07516 | 1.16255               | 0.15061 |
| 3600  | 92.257:7.743  | 0.08393 | 1.18324               | 0.16825 |
| 4800  | 91.453:8.547  | 0.09346 | 1.20619               | 0.18746 |
| 6000  | 90.698:9.302  | 0.10256 | 1.22856               | 0.20584 |
| 7200  | 90.144:9.856  | 0.10934 | 1.24552               | 0.21955 |
| 9000  | 89.298:10.702 | 0.11985 | 1.27233               | 0.24085 |

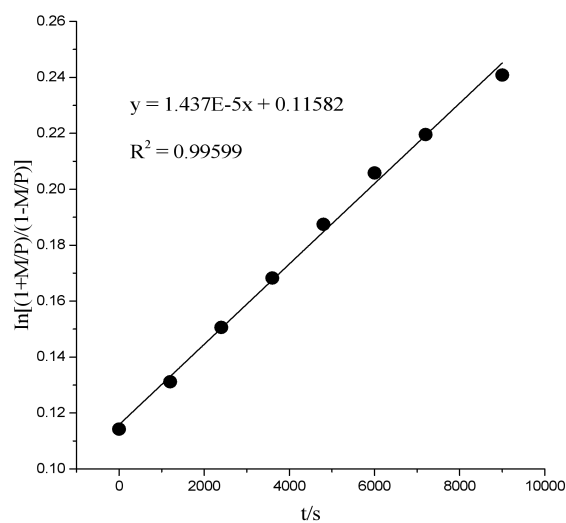

$$k_{ent} = \frac{1}{2} k_{rac}$$

$$k_{ent} = \frac{1}{2} slope = 7.185 \times 10^{-6}$$

$$\Delta G_T^\ddagger = \ln \left( \frac{k_B T}{h \times k_{ent}} \right) RT = 107.66 \text{ kJ mol}^{-1}$$

## Barriers to racemization of **4j**

Fractions collected and racemized by incubation at 40 °C in isopropyl alcohol.

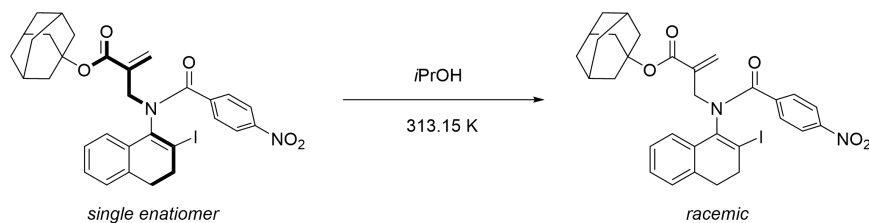

| t/(s) | er           | M/P     | $[1+(M/P)]/[1-(M/P)]$ | In      |
|-------|--------------|---------|-----------------------|---------|
| 0     | 97.013:2.987 | 0.03079 | 1.06354               | 0.06160 |
| 2400  | 96.067:3.933 | 0.04094 | 1.08538               | 0.08193 |
| 4800  | 95.099:4.901 | 0.05154 | 1.10867               | 0.10316 |
| 7200  | 93.742:6.258 | 0.06676 | 1.14307               | 0.13371 |
| 9600  | 92.840:7.160 | 0.07712 | 1.16713               | 0.15455 |
| 12000 | 91.680:8.320 | 0.09075 | 1.19962               | 0.18200 |

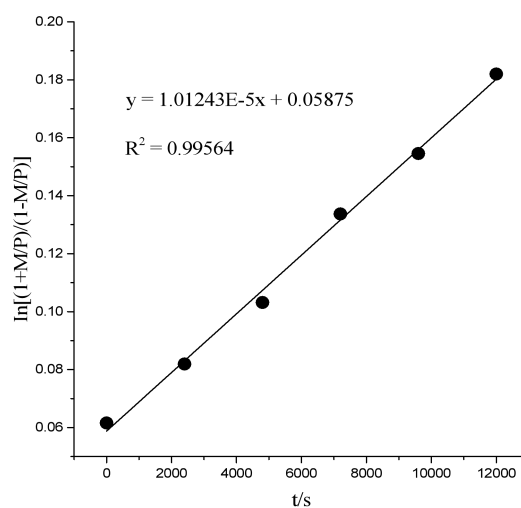

$$k_{ent} = \frac{1}{2} k_{rac}$$

$$k_{ent} = \frac{1}{2} slope = 5.06215 \times 10^{-6}$$

$$\Delta G_r^\ddagger = \ln \left( \frac{k_B T}{h \times k_{ent}} \right) RT = 108.57 \text{ kJ mol}^{-1} = 25.94 \text{ kcal/mol}$$

## Barriers to racemization of **4I**

Fractions collected and racemized by incubation at 40 °C in isopropyl alcohol.

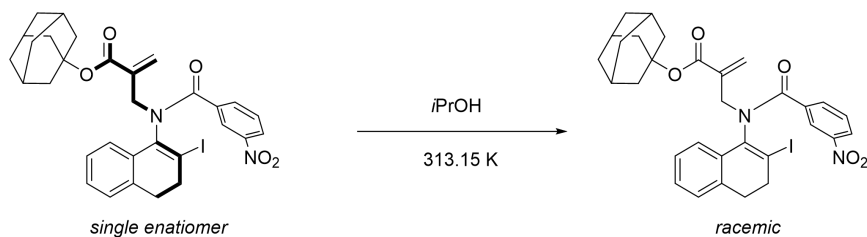

| t/(s) | er            | M/P     | $[1+(M/P)]/[1-(M/P)]$ | In      |
|-------|---------------|---------|-----------------------|---------|
| 0     | 94.991:5.009  | 0.05273 | 1.11133               | 0.10556 |
| 2400  | 93.526:6.474  | 0.06922 | 1.14874               | 0.13866 |
| 4800  | 92.262:7.738  | 0.08387 | 1.18310               | 0.16813 |
| 7200  | 91.301:8.699  | 0.09528 | 1.21062               | 0.19114 |
| 9600  | 89.945:10.055 | 0.11179 | 1.25172               | 0.22452 |
| 12000 | 89.128:10.872 | 0.12198 | 1.27786               | 0.24518 |

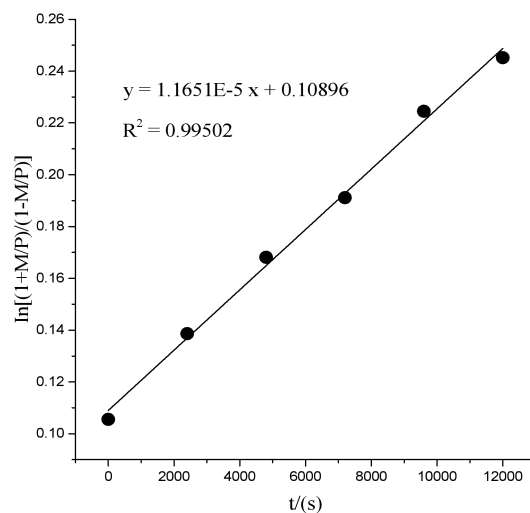

$$k_{ent} = \frac{1}{2} k_{rac}$$

$$k_{ent} = \frac{1}{2} \text{slope} = 5.8255 \times 10^{-6}$$

$$\Delta G_T^\ddagger = \ln \left( \frac{k_B T}{h \times k_{ent}} \right) RT = 108.21 \text{ kJ mol}^{-1} = 25.85 \text{ kcal/mol}$$



## Barriers to racemization of **4n**

Fractions collected and racemized by incubation at 60 °C in isopropyl alcohol.

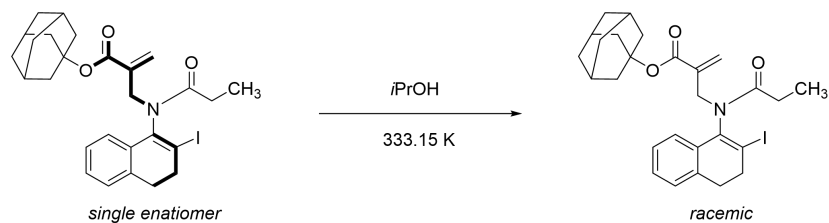

| t/(s) | er            | M/P     | $[1+(M/P)]/[1-(M/P)]$ | ln      |
|-------|---------------|---------|-----------------------|---------|
| 0     | 81.994:18.006 | 0.21960 | 1.56279               | 0.44647 |
| 1500  | 81.890:18.110 | 0.22115 | 1.56789               | 0.44973 |
| 3000  | 81.788:18.212 | 0.22267 | 1.57292               | 0.45293 |
| 4500  | 81.605:18.395 | 0.22542 | 1.58203               | 0.45871 |
| 6000  | 81.387:18.613 | 0.22870 | 1.59302               | 0.46563 |
| 7500  | 81.322:18.688 | 0.22980 | 1.59674               | 0.46802 |
| 9000  | 81.149:18.851 | 0.23230 | 1.60519               | 0.47324 |
| 10500 | 81.054:18.946 | 0.23375 | 1.61010               | 0.47630 |
| 12000 | 80.857:19.143 | 0.23675 | 1.62038               | 0.48266 |
| 13500 | 80.721:19.279 | 0.23883 | 1.62755               | 0.48708 |
| 15000 | 80.625:19.375 | 0.24031 | 1.63265               | 0.49021 |
| 16500 | 80.506:19.494 | 0.24214 | 1.63902               | 0.49410 |

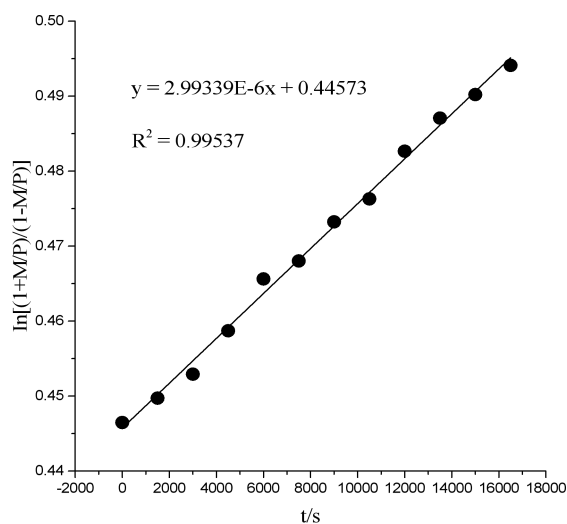

$$k_{ent} = \frac{1}{2} k_{rac}$$

$$k_{ent} = \frac{1}{2} \text{slope} = 1.496695 \times 10^{-6}$$

$$\Delta G_T^\ddagger = \ln \left( \frac{k_B T}{h \times k_{ent}} \right) RT = 119.06 \text{ kJ mol}^{-1} = 28.44 \text{ kcal/mol}^{-1}$$

## Barriers to racemization of **4za**

Fractions collected and racemized by incubation at 80 °C in isopropyl alcohol.

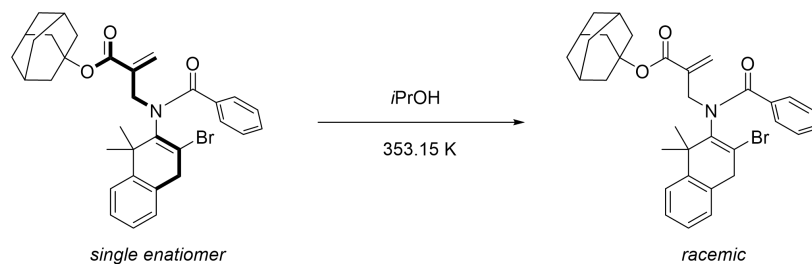

| t/(s) | er            | M/P     | [1+(M/P)]/[1-(M/P)] | ln      |
|-------|---------------|---------|---------------------|---------|
| 0     | 88.687:11.313 | 0.12756 | 1.29242             | 0.25652 |
| 720   | 78.761:21.239 | 0.26966 | 1.73847             | 0.55300 |
| 1440  | 69.985:30.015 | 0.42888 | 2.50188             | 0.91704 |
| 2160  | 64.644:35.356 | 0.54693 | 3.41437             | 1.22800 |
| 2880  | 61.157:38.843 | 0.63514 | 4.48149             | 1.49996 |
| 3600  | 58.113:41.887 | 0.72079 | 6.16295             | 1.81856 |
| 4320  | 56.129:43.871 | 0.78161 | 8.15794             | 2.09899 |

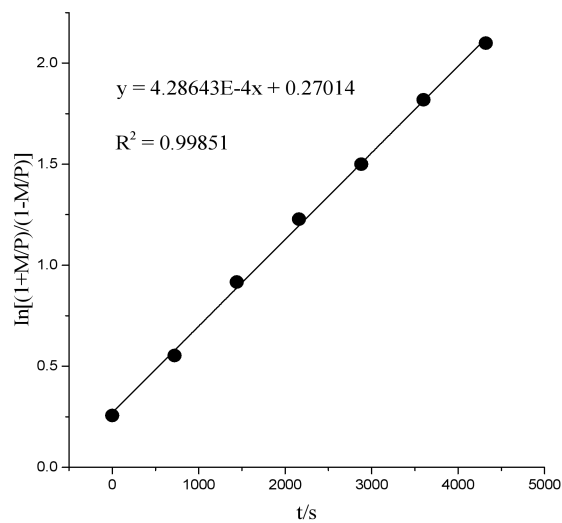

$$k_{ent} = \frac{1}{2} k_{rac}$$

$$k_{ent} = \frac{1}{2} slope = 2.14315 \times 10^{-4}$$

$$\Delta G_T^\ddagger = \ln \left( \frac{k_B T}{h \times k_{ent}} \right) RT = 111.80 \text{ kJ mol}^{-1} = 26.71 \text{ kcal/mol}^{-1}$$



The linear relationship between rotational barriers and Hammett constant  $\sigma$

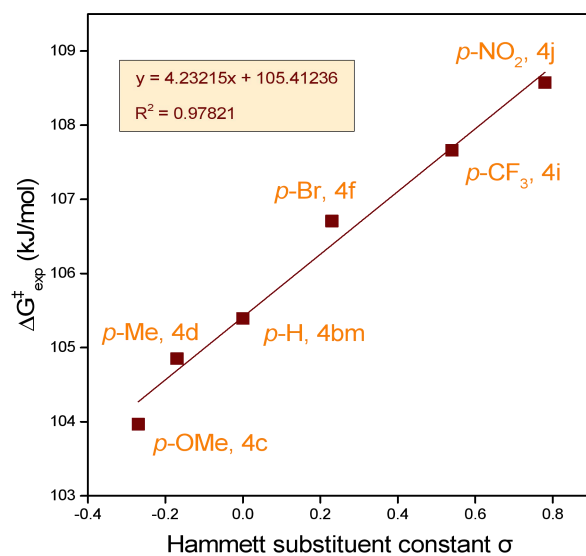

Proposed transition state

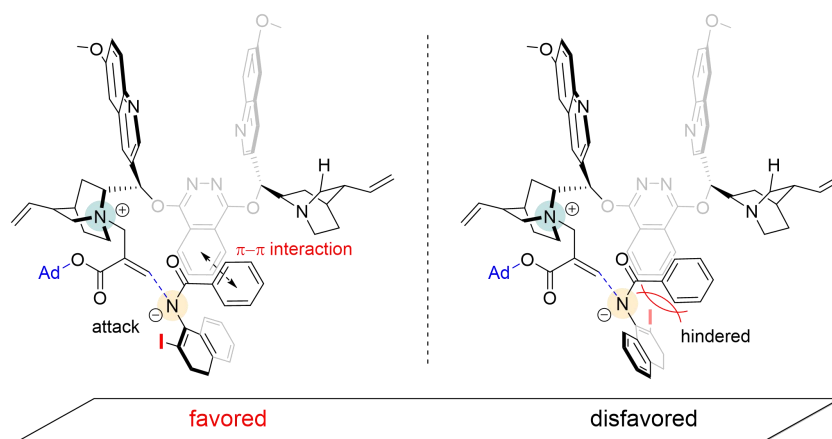

## 7. X-Ray Crystallographic Data

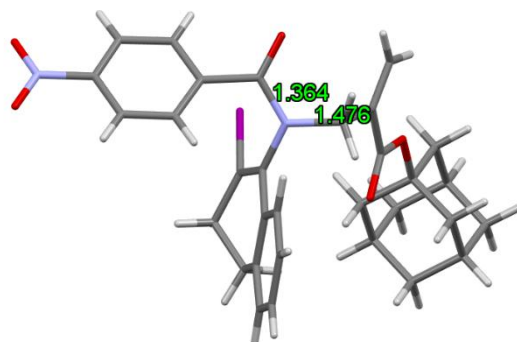

The X-ray single crystal structure of **4j**

Crystal data and structure refinement for r20211010b

|                                             |                                                                |
|---------------------------------------------|----------------------------------------------------------------|
| Identification code                         | r20211010b                                                     |
| Empirical formula                           | C <sub>31</sub> H <sub>31</sub> N <sub>2</sub> O <sub>5</sub>  |
| Formula weight                              | 638.48                                                         |
| Temperature/K                               | 113.15                                                         |
| Crystal system                              | monoclinic                                                     |
| Space group                                 | P21/c                                                          |
| a/Å                                         | 9.2462(3)                                                      |
| b/Å                                         | 13.0571(3)                                                     |
| c/Å                                         | 23.0265(7)                                                     |
| $\alpha$ /°                                 | 90                                                             |
| $\beta$ /°                                  | 96.045(3)                                                      |
| $\gamma$ /°                                 | 90                                                             |
| Volume/Å <sup>3</sup>                       | 2764.50(14)                                                    |
| Z                                           | 4                                                              |
| $\rho$ calc/cm <sup>3</sup>                 | 1.534                                                          |
| $\mu$ /mm <sup>-1</sup>                     | 1.202                                                          |
| F(000)                                      | 1296.0                                                         |
| Crystal size/mm <sup>3</sup>                | 0.22 × 0.17 × 0.13                                             |
| Radiation                                   | MoK $\alpha$ ( $\lambda$ = 0.71073)                            |
| 2 $\theta$ range for data collection/°      | 4.732 to 52.744                                                |
| Index ranges                                | -10 ≤ h ≤ 11, -16 ≤ k ≤ 16, -28 ≤ l ≤ 28                       |
| Reflections collected                       | 20680                                                          |
| Independent reflections                     | 5642 [ $R_{\text{int}}$ = 0.0452, $R_{\text{sigma}}$ = 0.0392] |
| Data/restraints/parameters                  | 5642/0/353                                                     |
| Goodness-of-fit on F <sup>2</sup>           | 1.061                                                          |
| Final R indexes [ $I$ ≥ 2 $\sigma$ ( $I$ )] | $R_1$ = 0.0377, $wR_2$ = 0.0785                                |
| Final R indexes [all data]                  | $R_1$ = 0.0461, $wR_2$ = 0.0829                                |
| Largest diff. peak/hole / e Å <sup>-3</sup> | 1.96/-0.69                                                     |

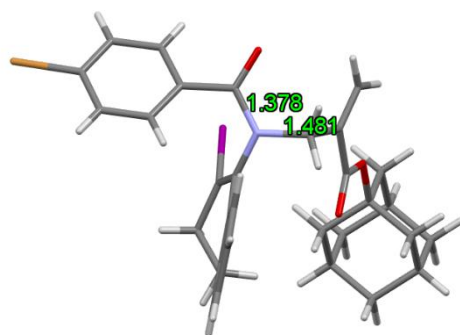

The X-ray single crystal structure of **4f**

Crystal data and structure refinement for r20210720b.

|                                             |                                                                |
|---------------------------------------------|----------------------------------------------------------------|
| Identification code                         | r20210720b                                                     |
| Empirical formula                           | C <sub>31</sub> H <sub>31</sub> BrINO <sub>3</sub>             |
| Formula weight                              | 672.38                                                         |
| Temperature/K                               | 113.15                                                         |
| Crystal system                              | triclinic                                                      |
| Space group                                 | P-1                                                            |
| a/Å                                         | 14.3867(9)                                                     |
| b/Å                                         | 14.4019(8)                                                     |
| c/Å                                         | 16.0728(8)                                                     |
| $\alpha$ /°                                 | 82.079(4)                                                      |
| $\beta$ /°                                  | 69.450(5)                                                      |
| $\gamma$ /°                                 | 61.749(6)                                                      |
| Volume/Å <sup>3</sup>                       | 2745.2(3)                                                      |
| Z                                           | 4                                                              |
| $\rho$ calc/gcm <sup>3</sup>                | 1.627                                                          |
| $\mu$ /mm <sup>-1</sup>                     | 2.655                                                          |
| F(000)                                      | 1344.0                                                         |
| Crystal size/mm <sup>3</sup>                | 0.22 × 0.2 × 0.16                                              |
| Radiation                                   | MoK $\alpha$ ( $\lambda$ = 0.71073)                            |
| 2 $\theta$ range for data collection/°      | 3.212 to 65.876                                                |
| Index ranges                                | -21 ≤ h ≤ 21, -21 ≤ k ≤ 21, -24 ≤ l ≤ 24                       |
| Reflections collected                       | 41517                                                          |
| Independent reflections                     | 18410 [R <sub>int</sub> = 0.0847, R <sub>sigma</sub> = 0.1339] |
| Data/restraints/parameters                  | 18410/0/667                                                    |
| Goodness-of-fit on F <sup>2</sup>           | 0.987                                                          |
| Final R indexes [I ≥ 2 $\sigma$ (I)]        | R <sub>1</sub> = 0.0568, wR <sub>2</sub> = 0.0907              |
| Final R indexes [all data]                  | R <sub>1</sub> = 0.1171, wR <sub>2</sub> = 0.1145              |
| Largest diff. peak/hole / e Å <sup>-3</sup> | 1.43/-1.16                                                     |

## 8. NMR Spectra and HPLC Spectra of Products

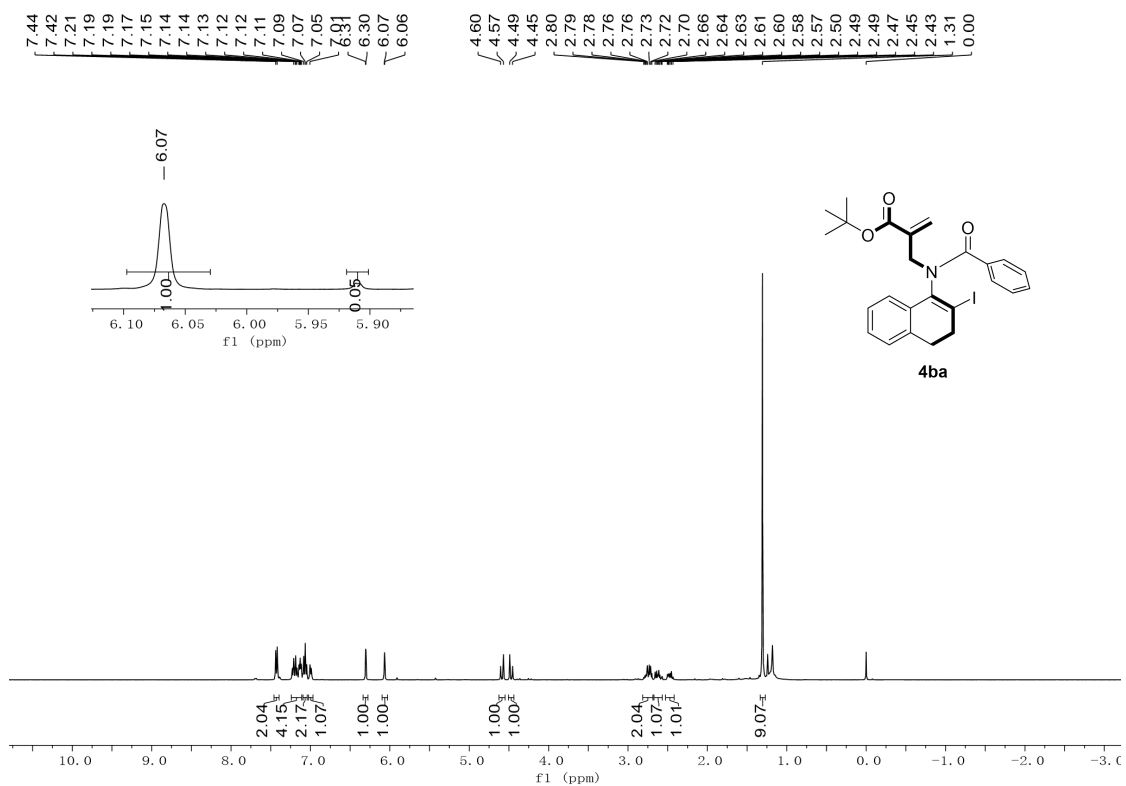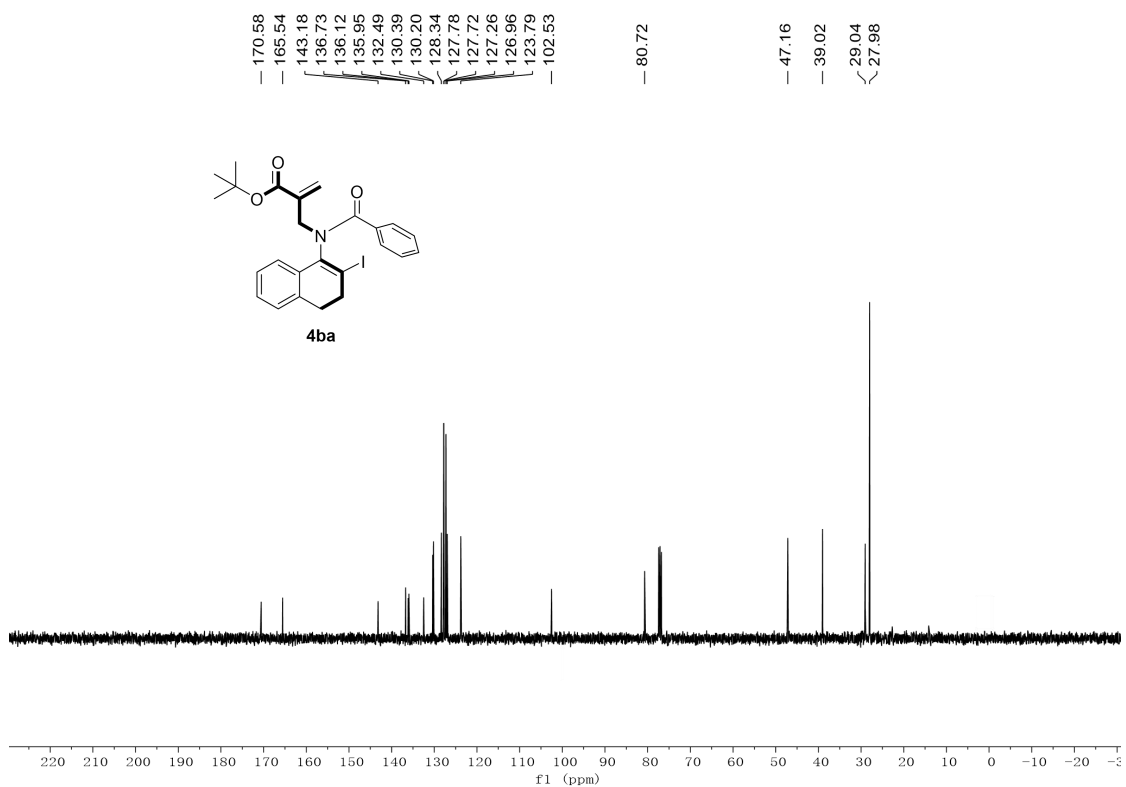

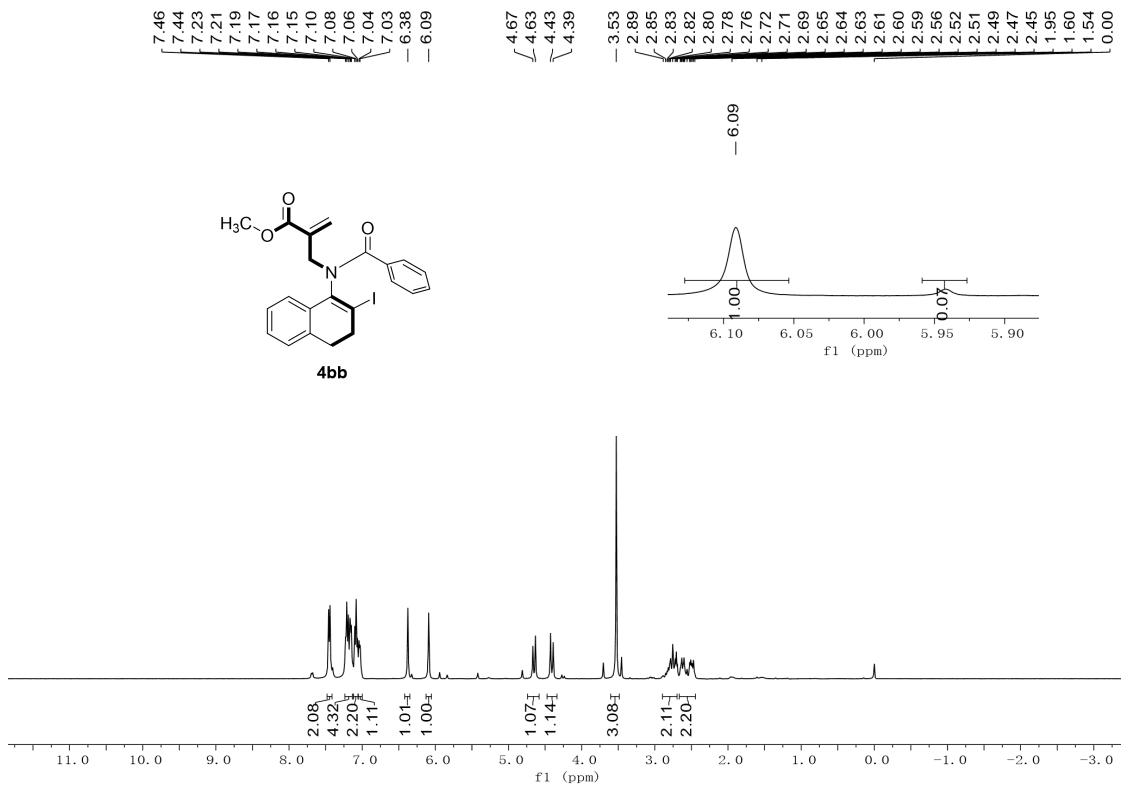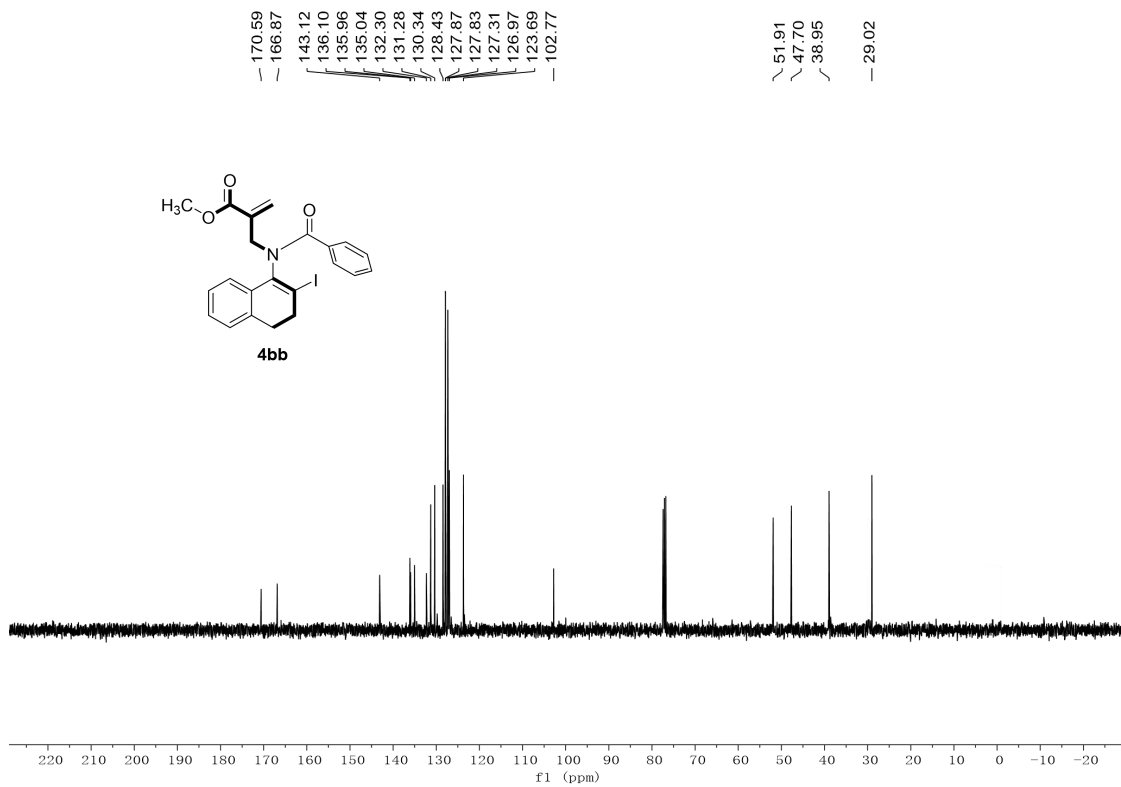

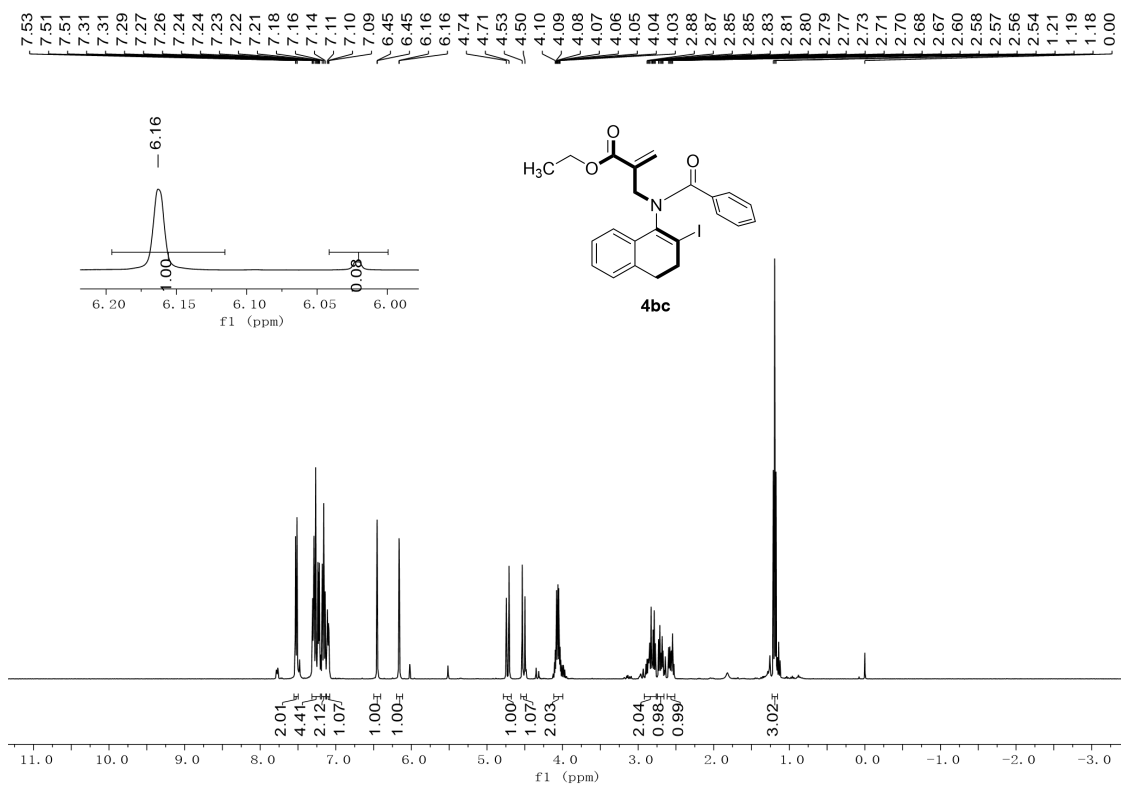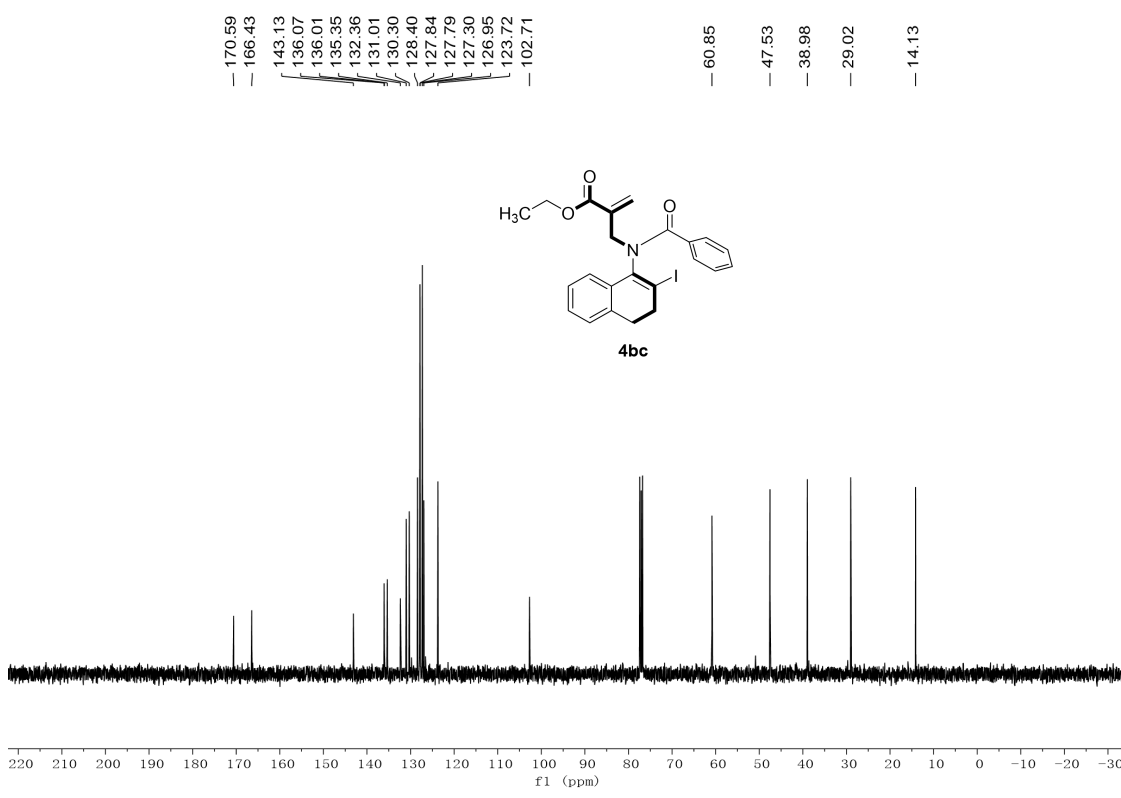

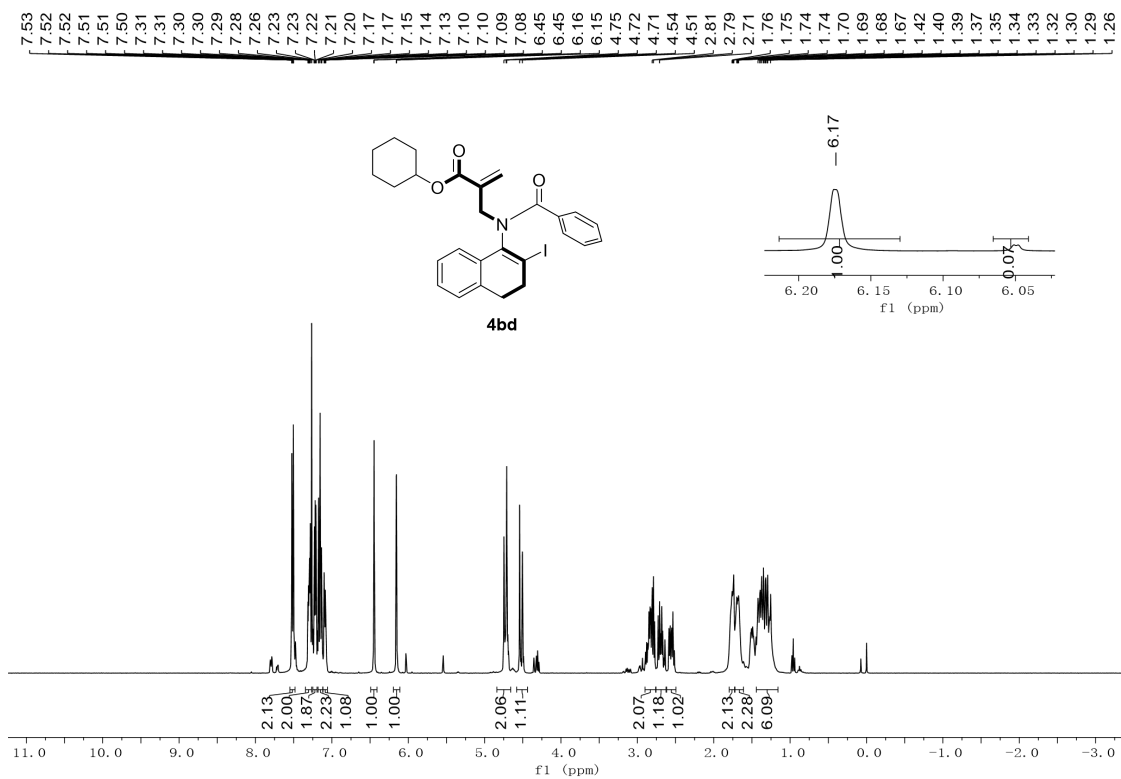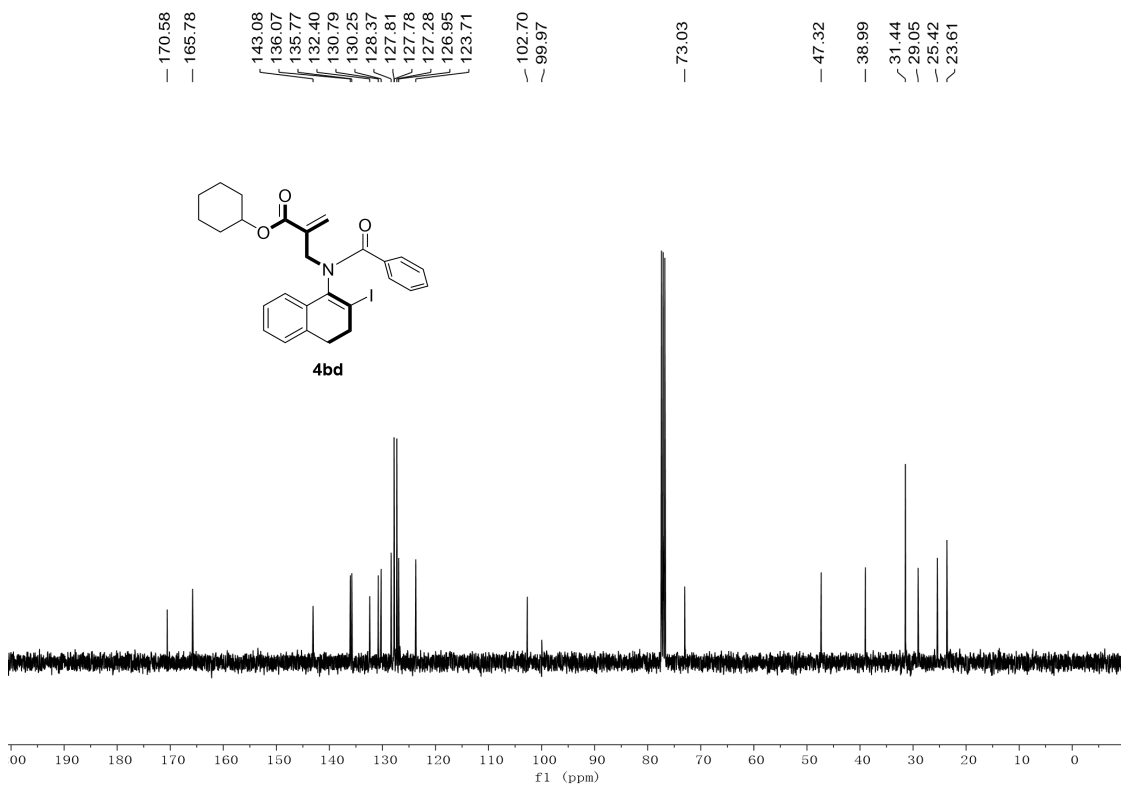

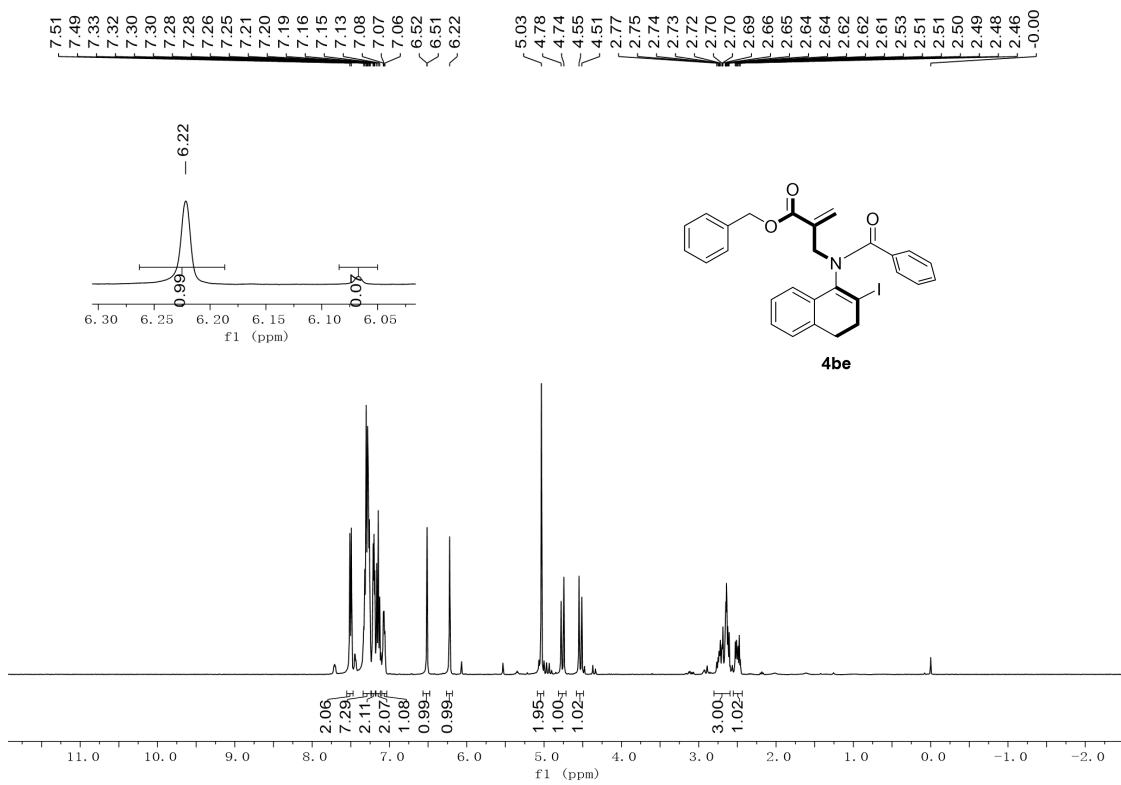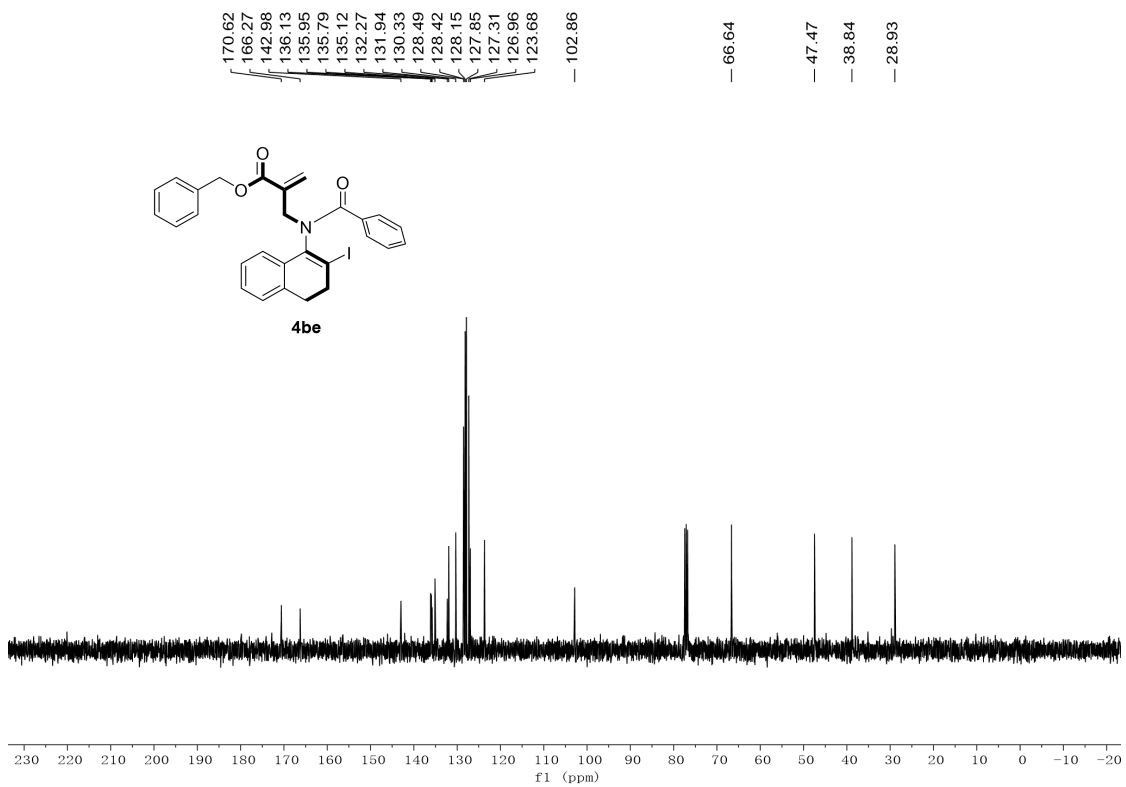



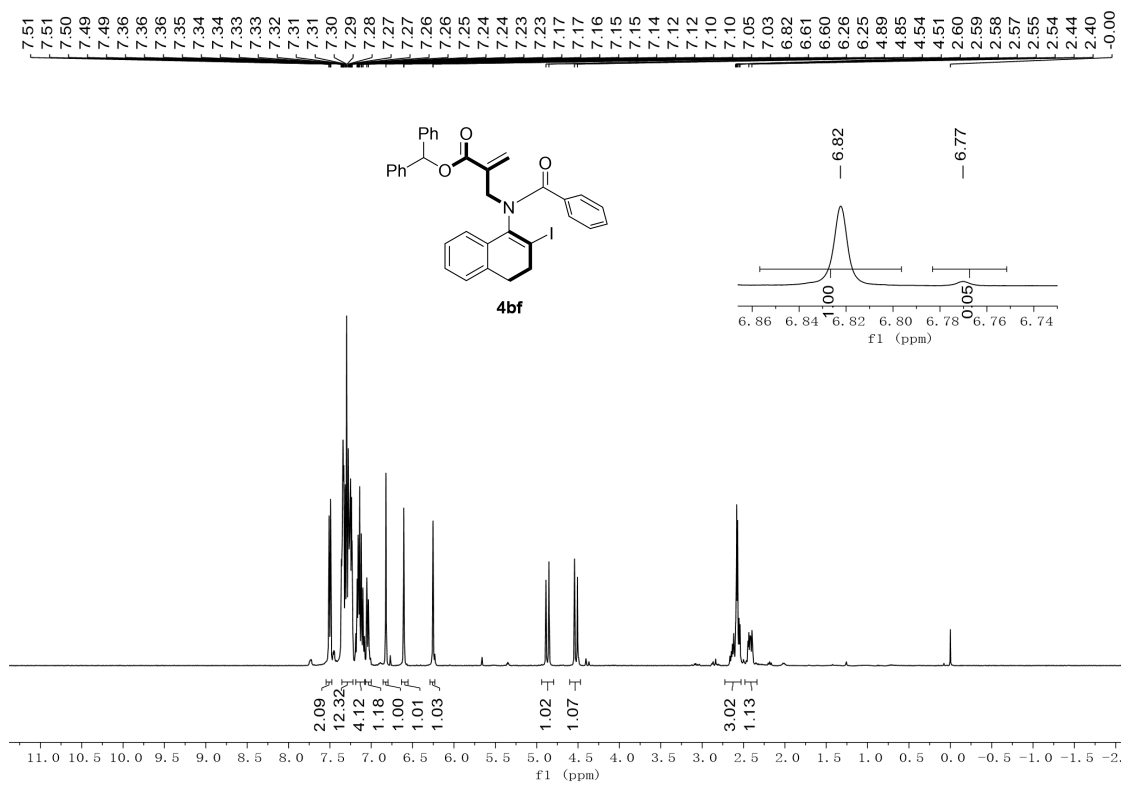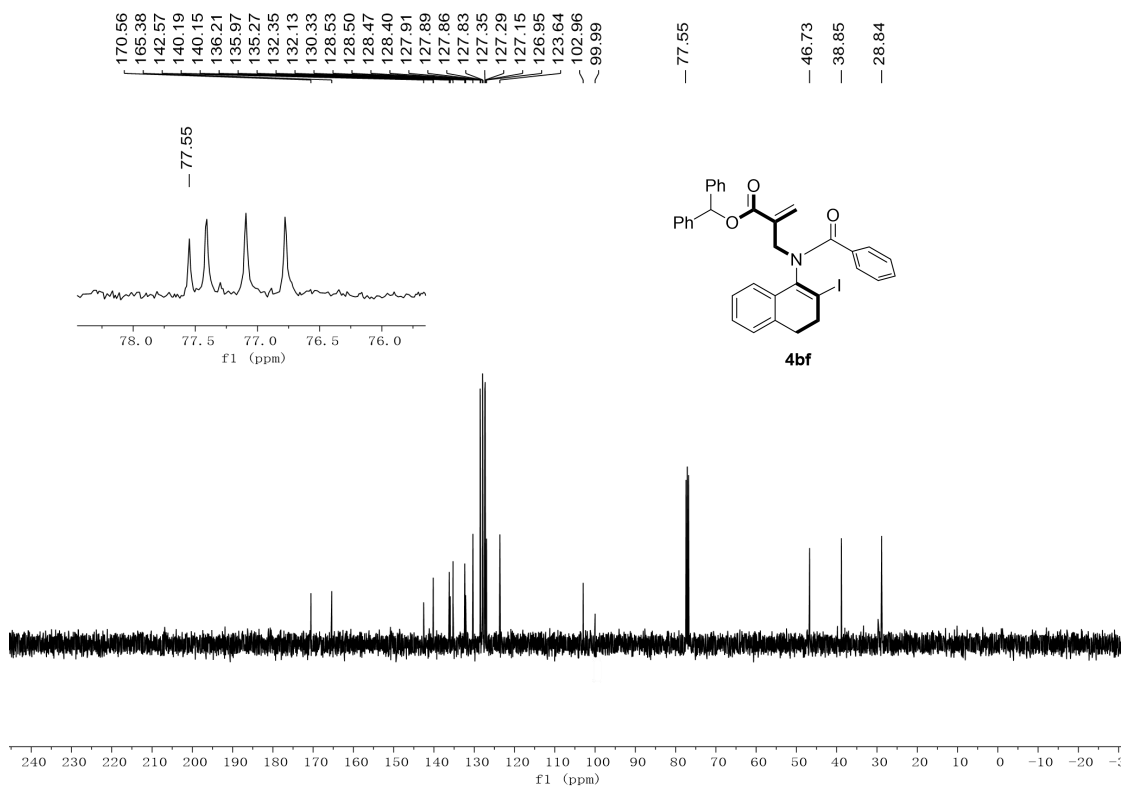

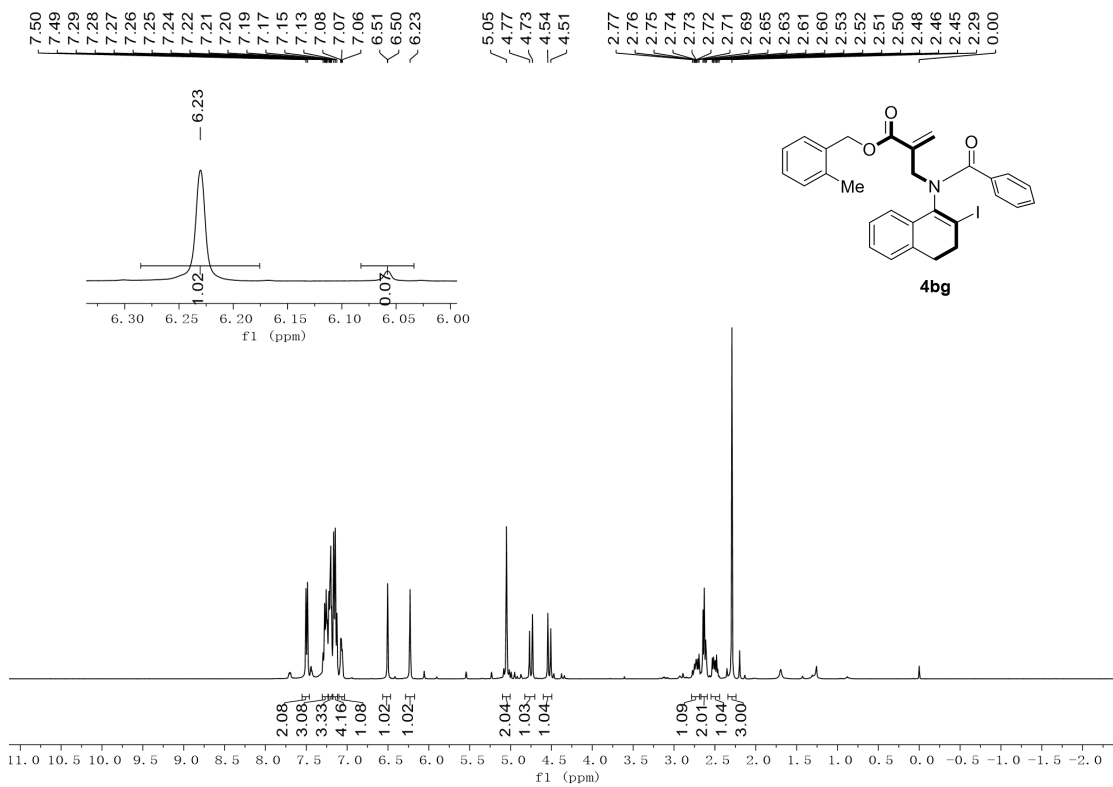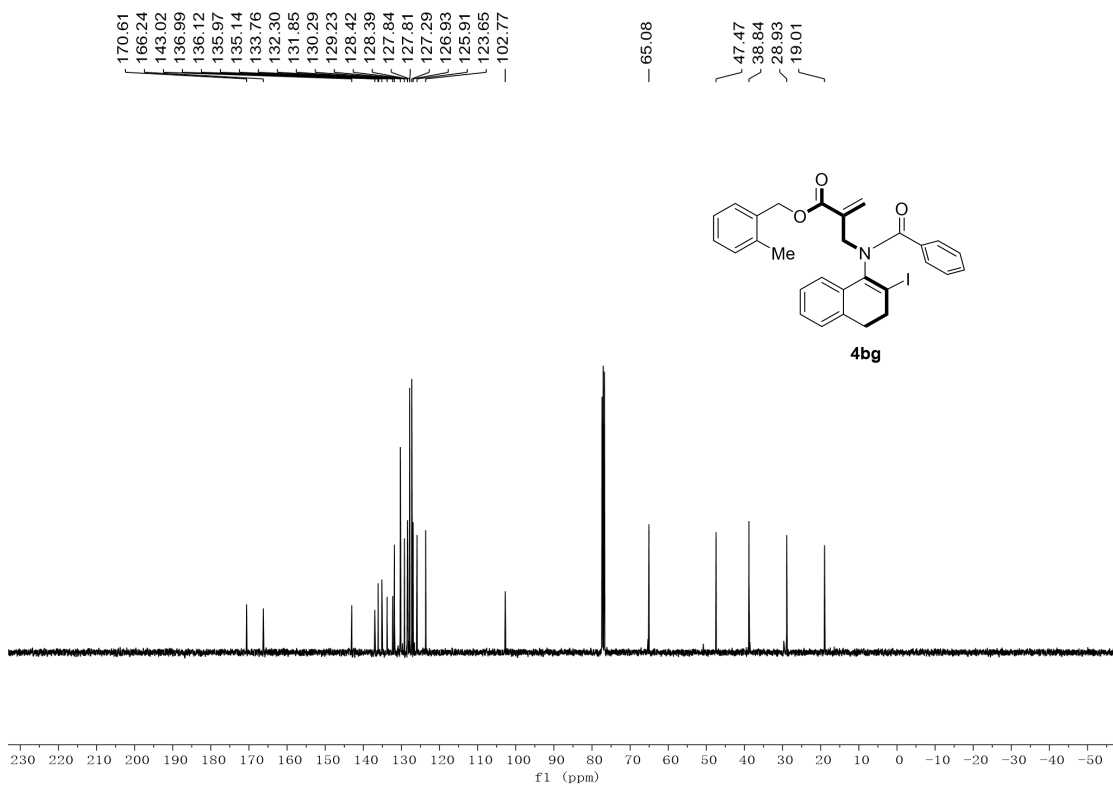

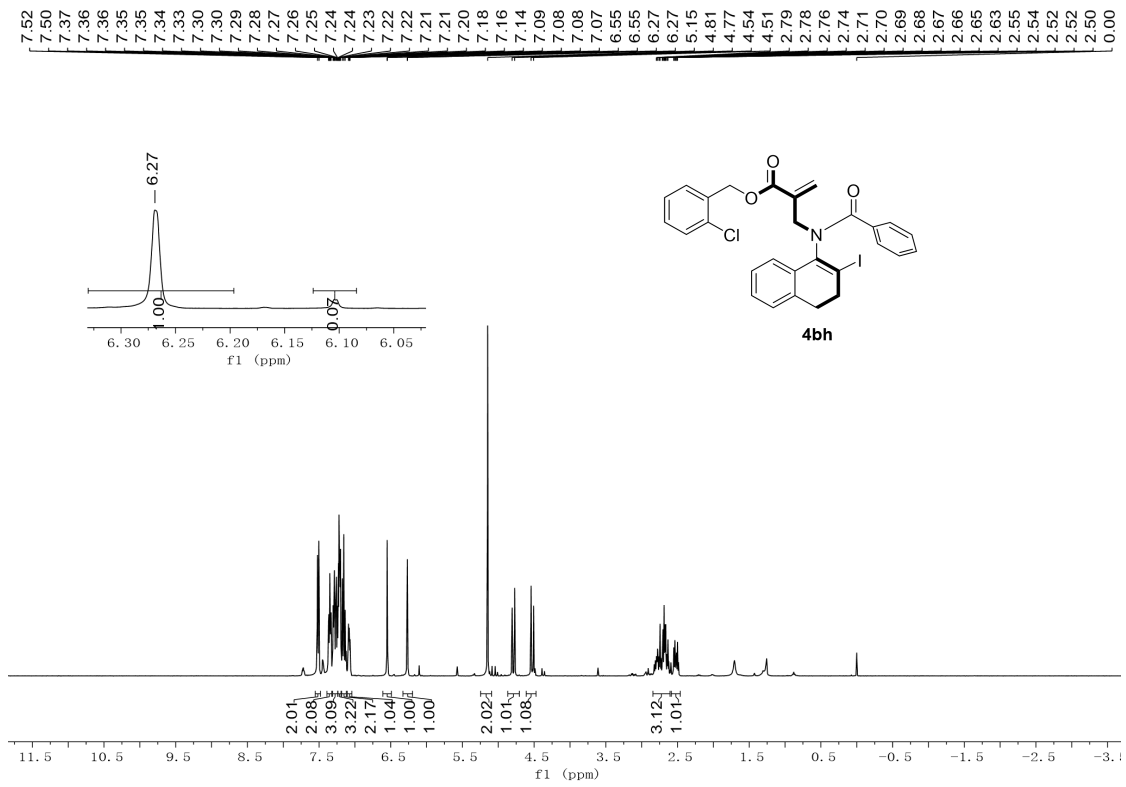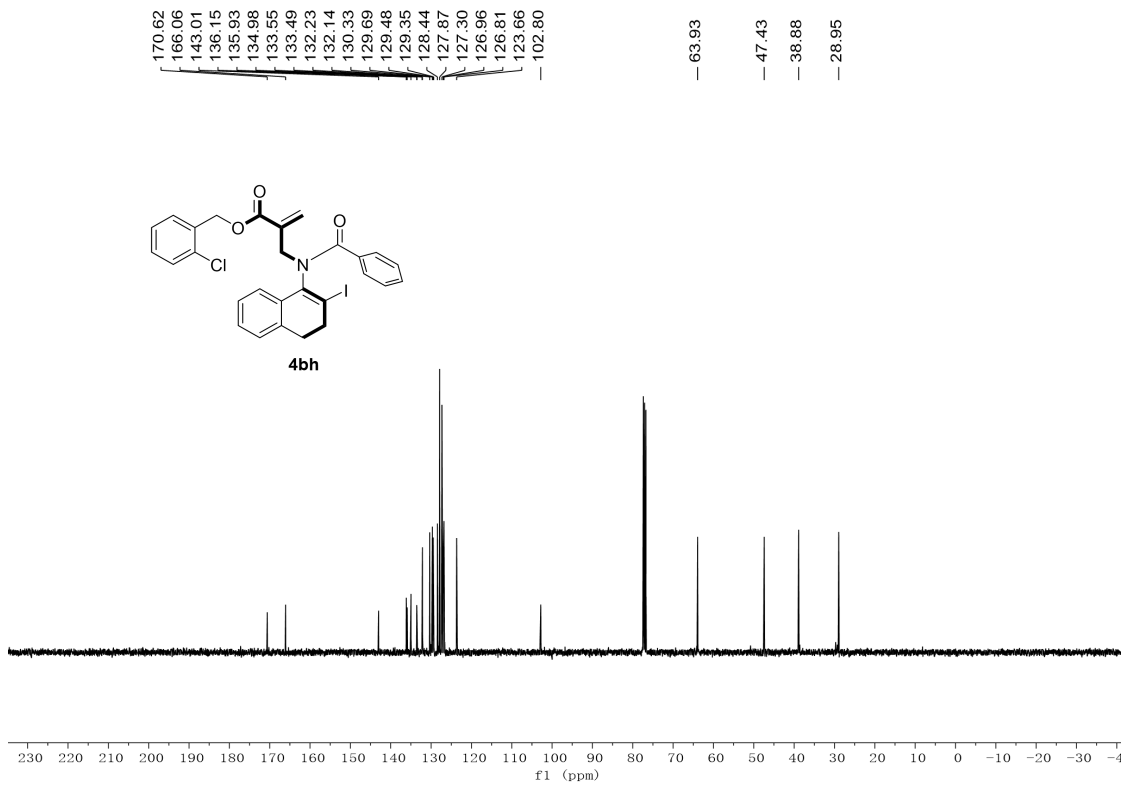

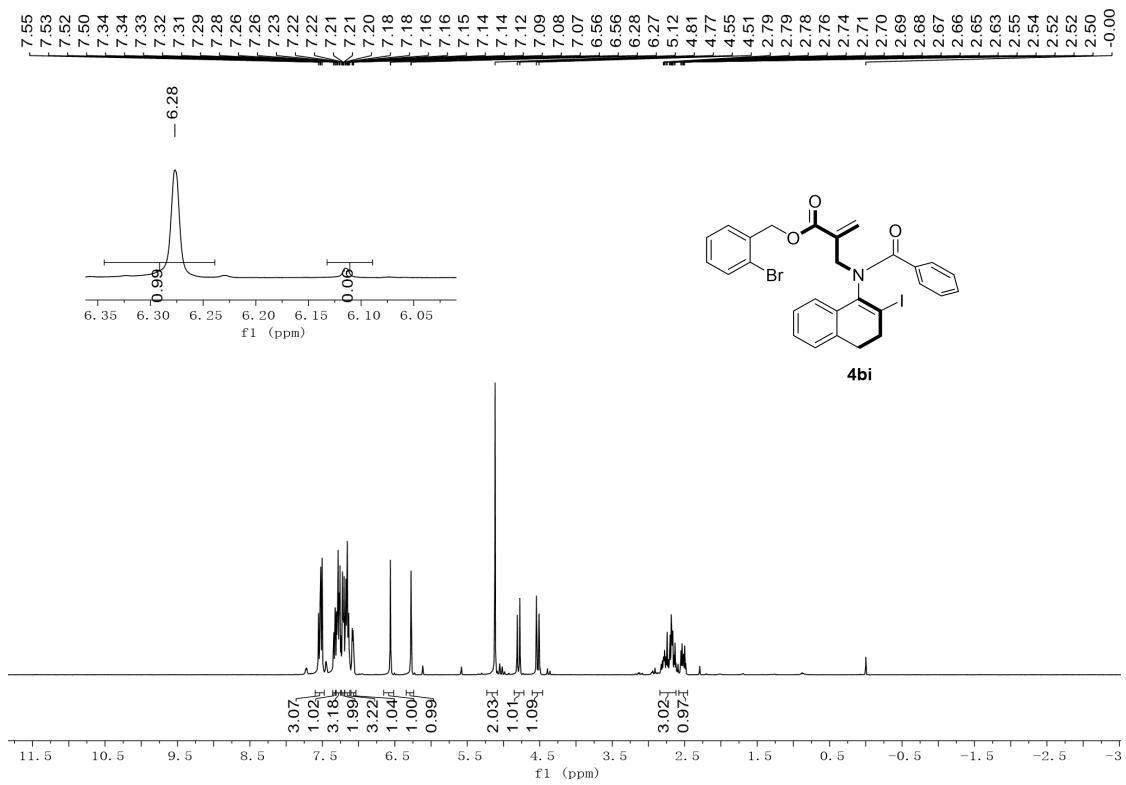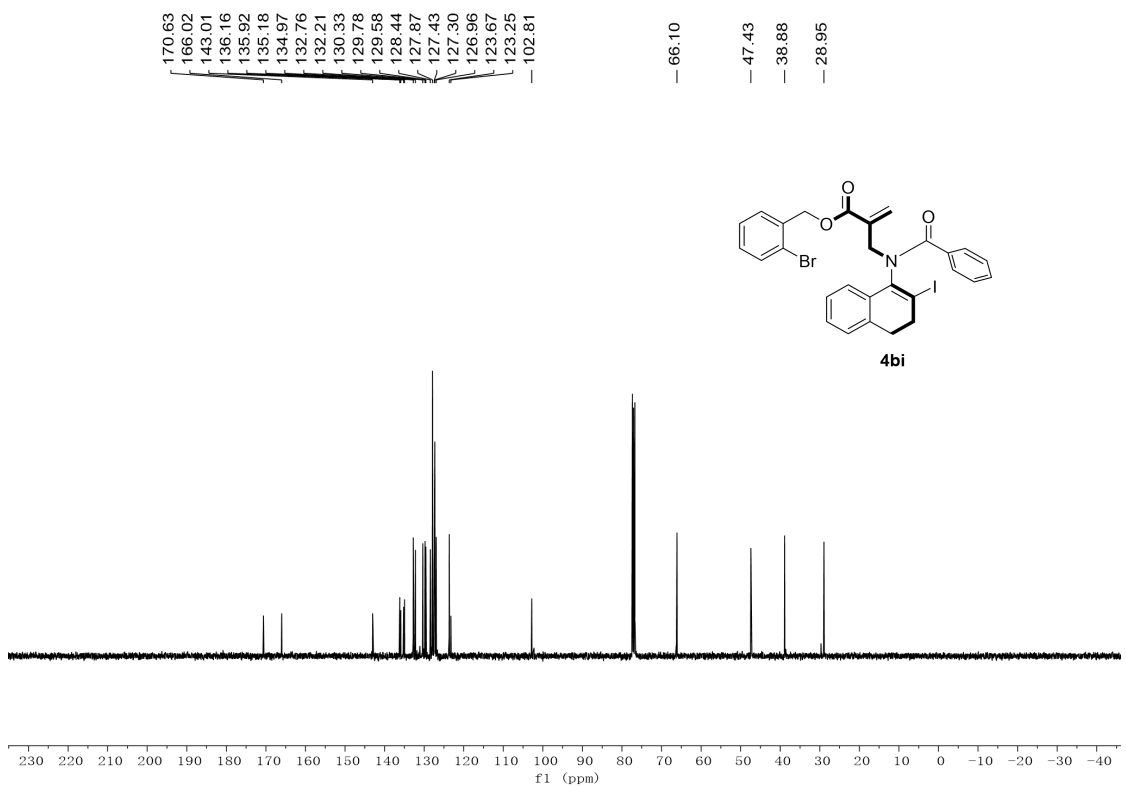

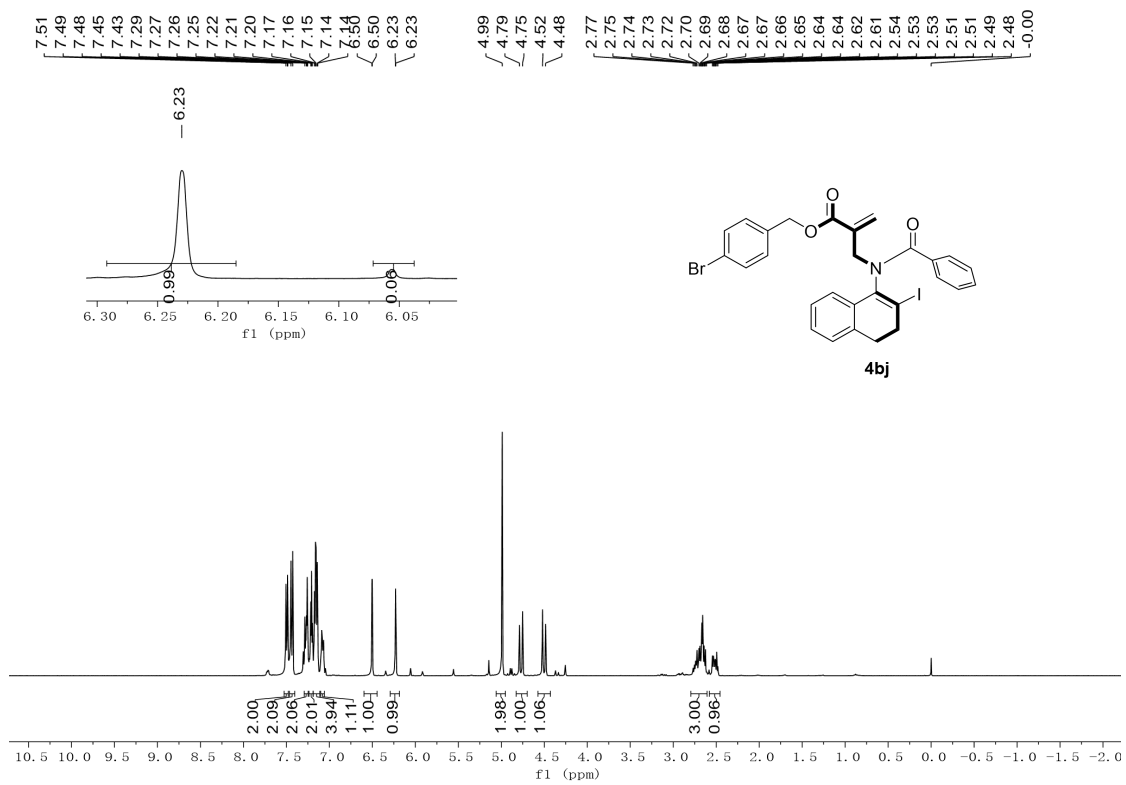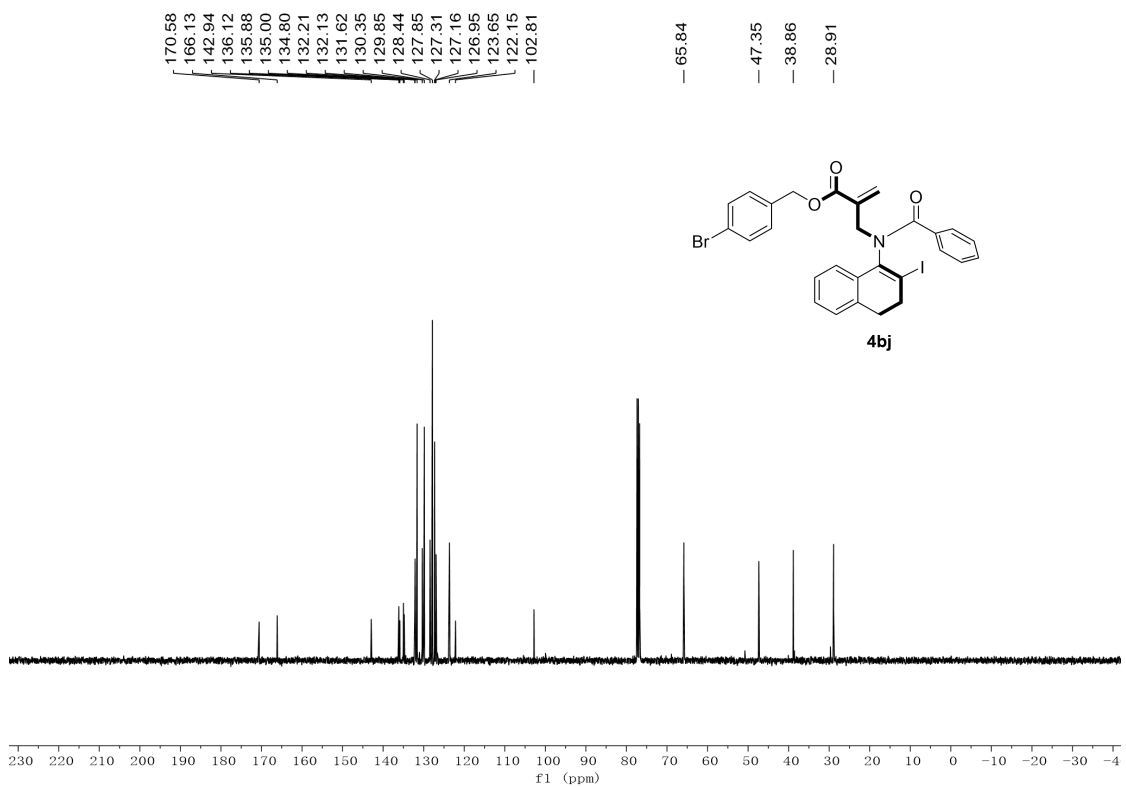

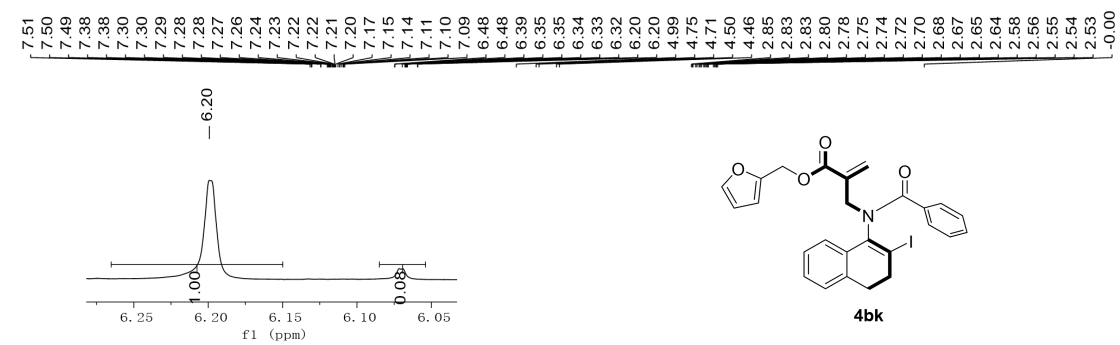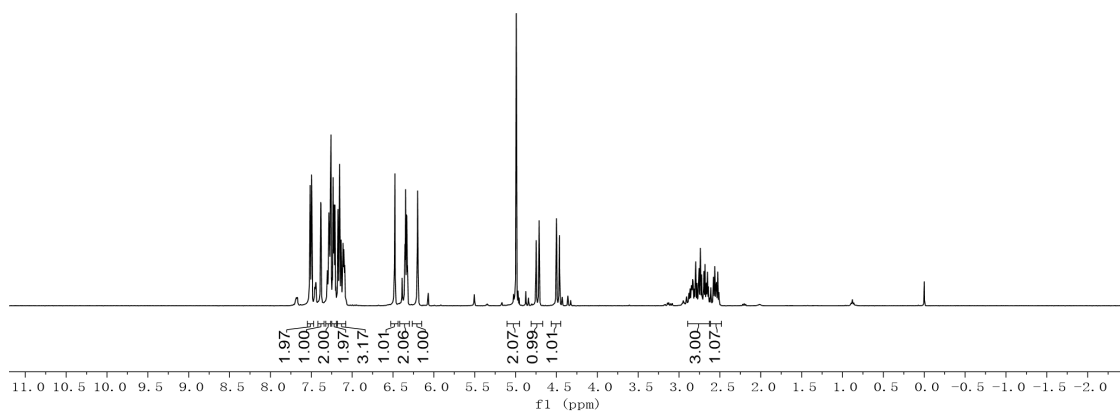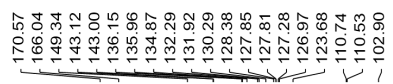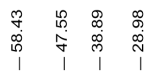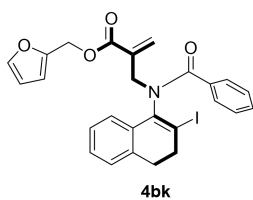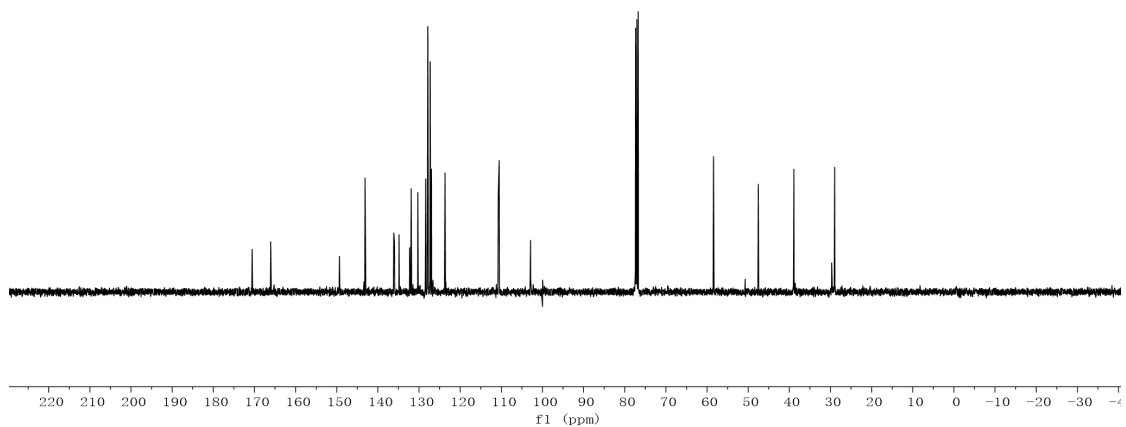

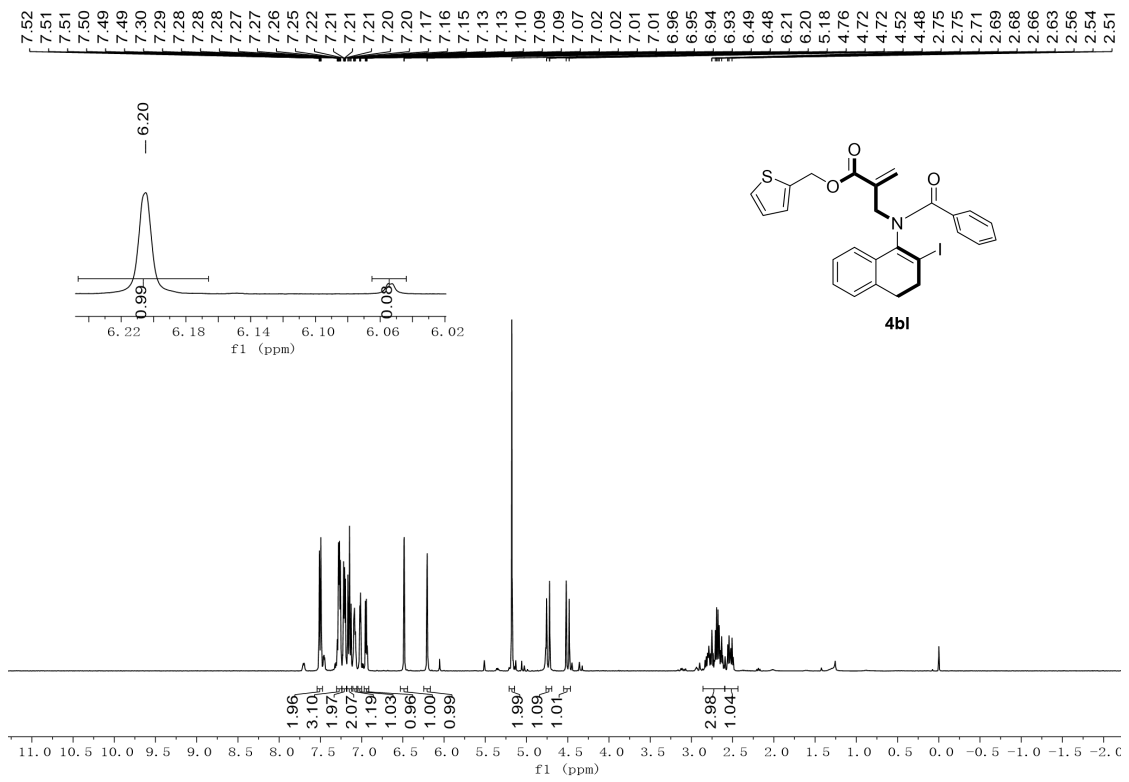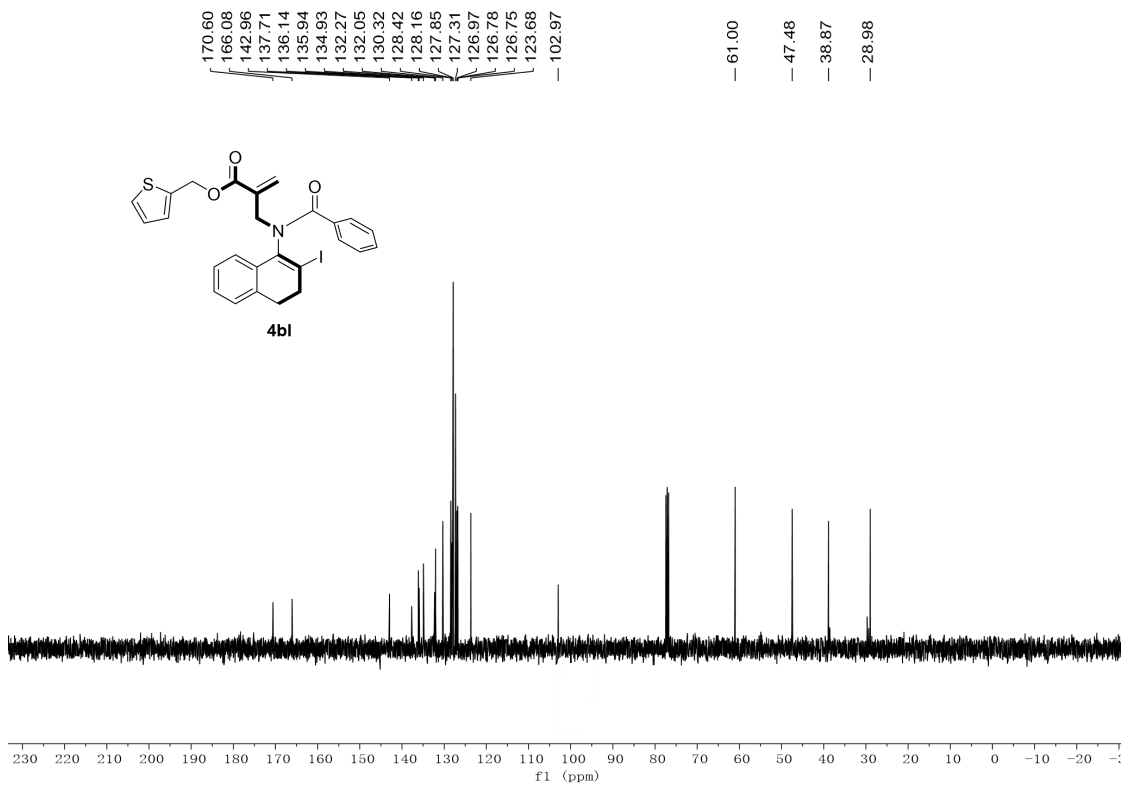

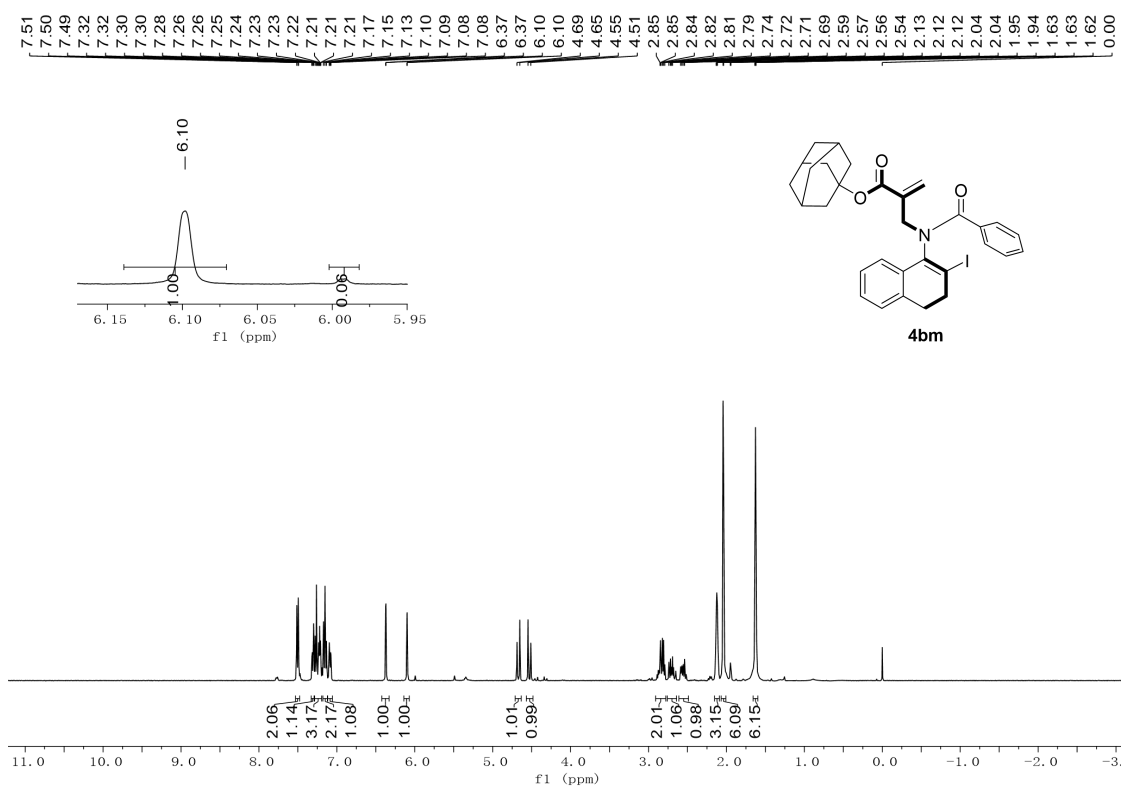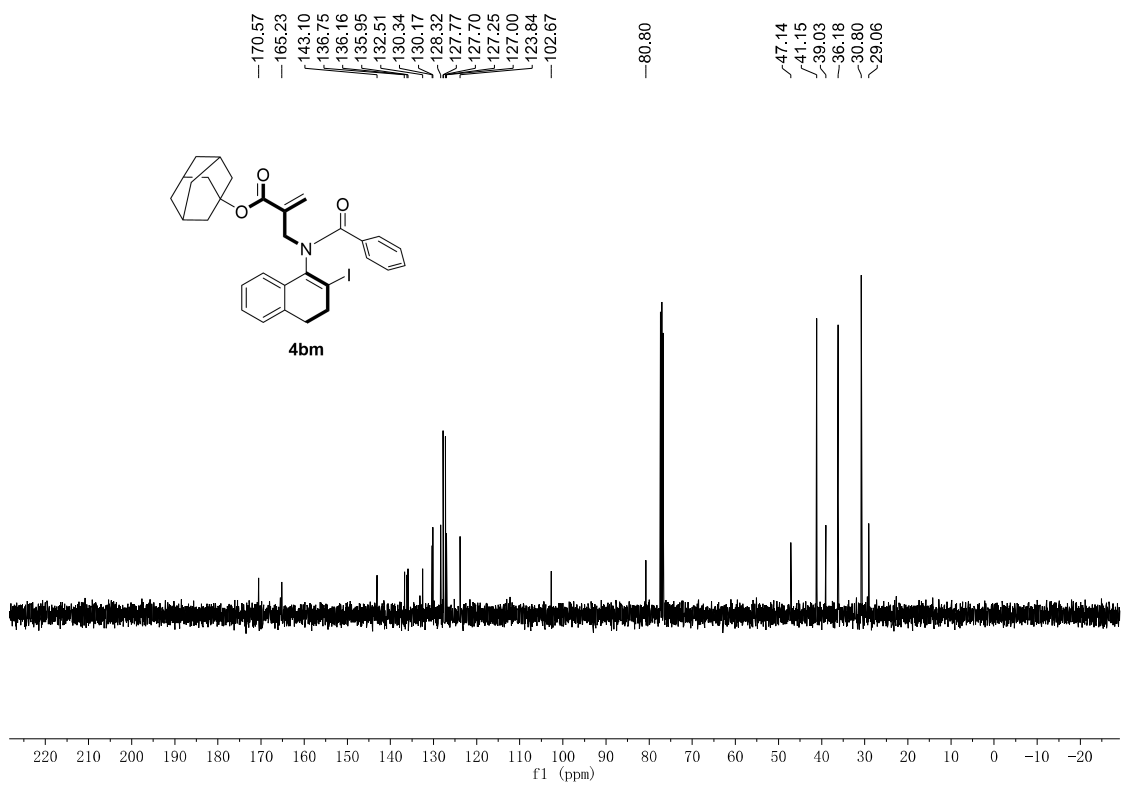



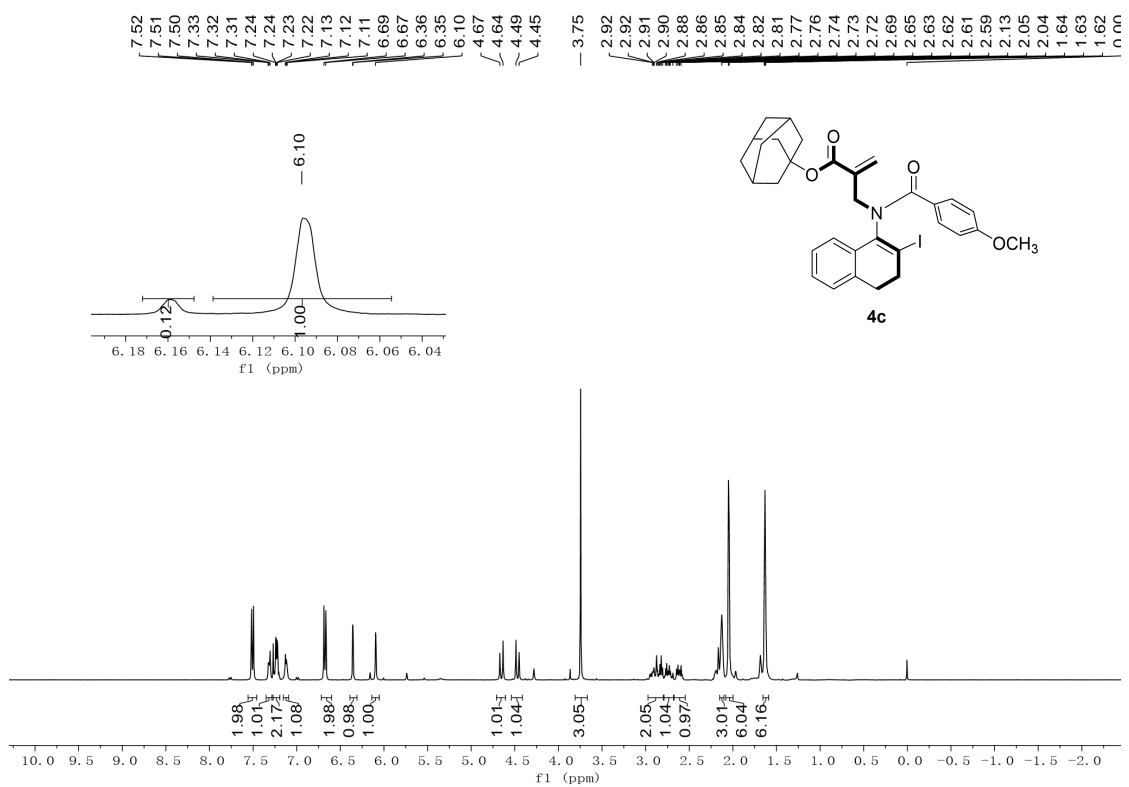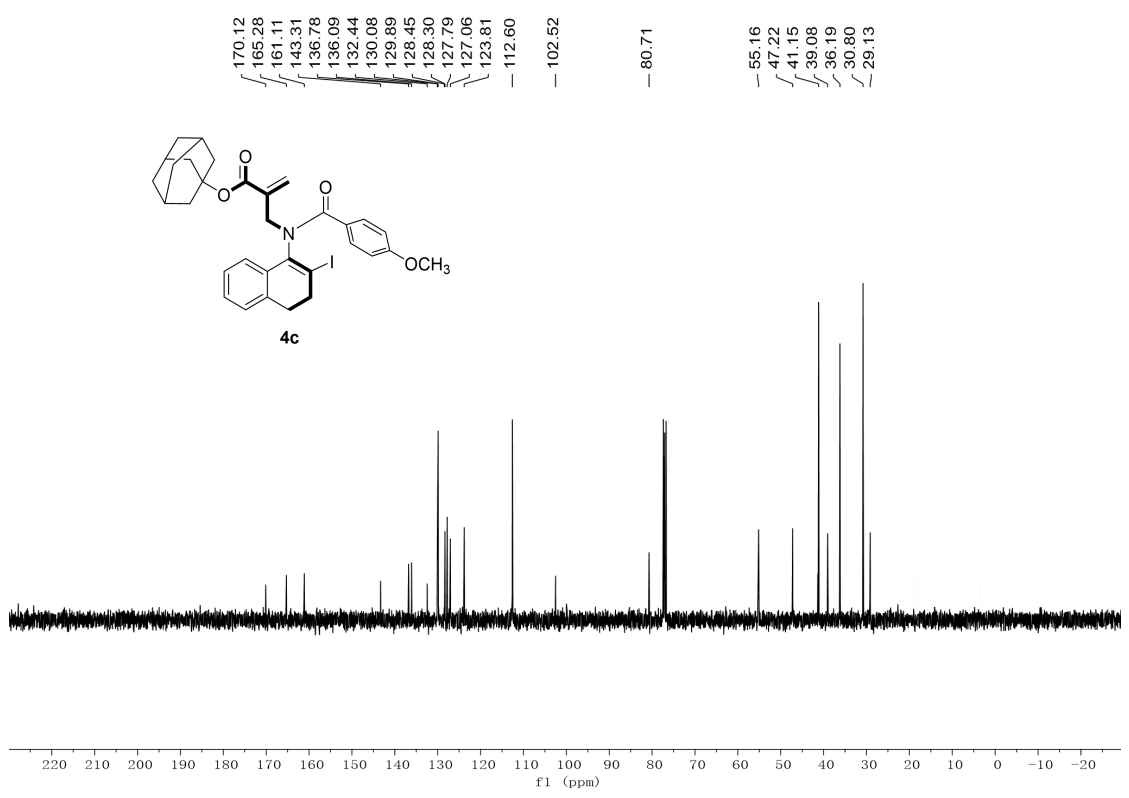

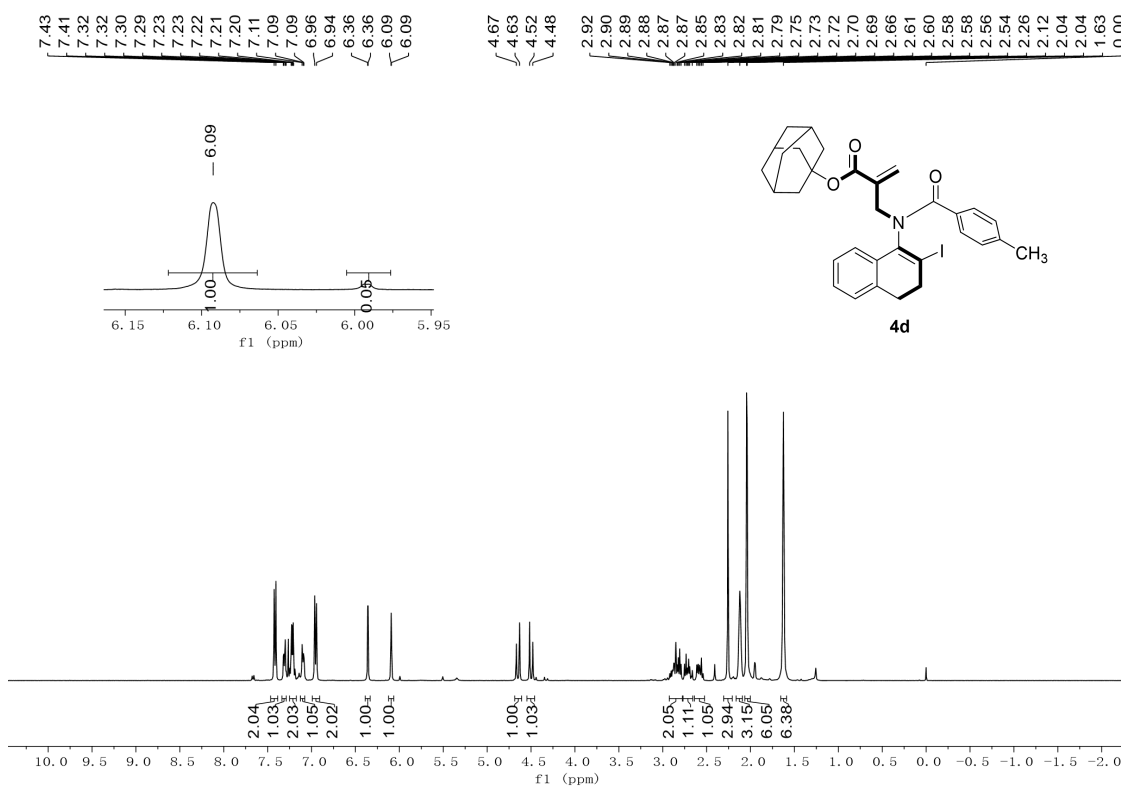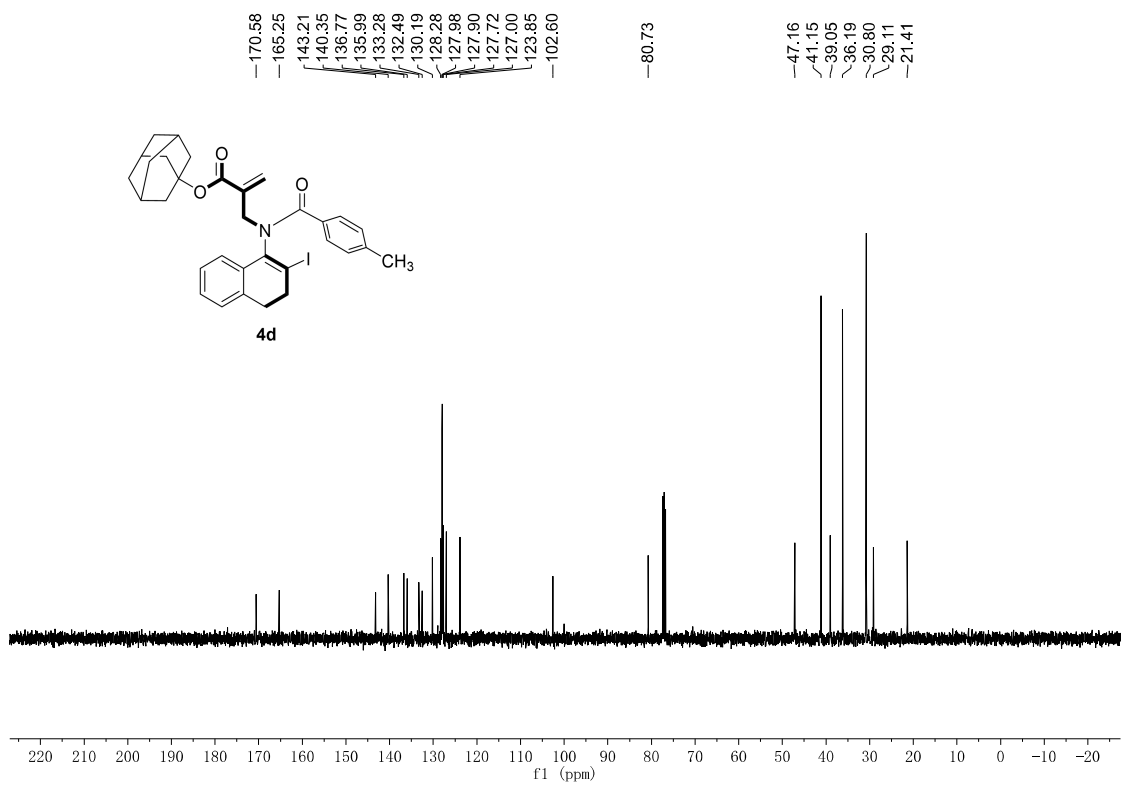

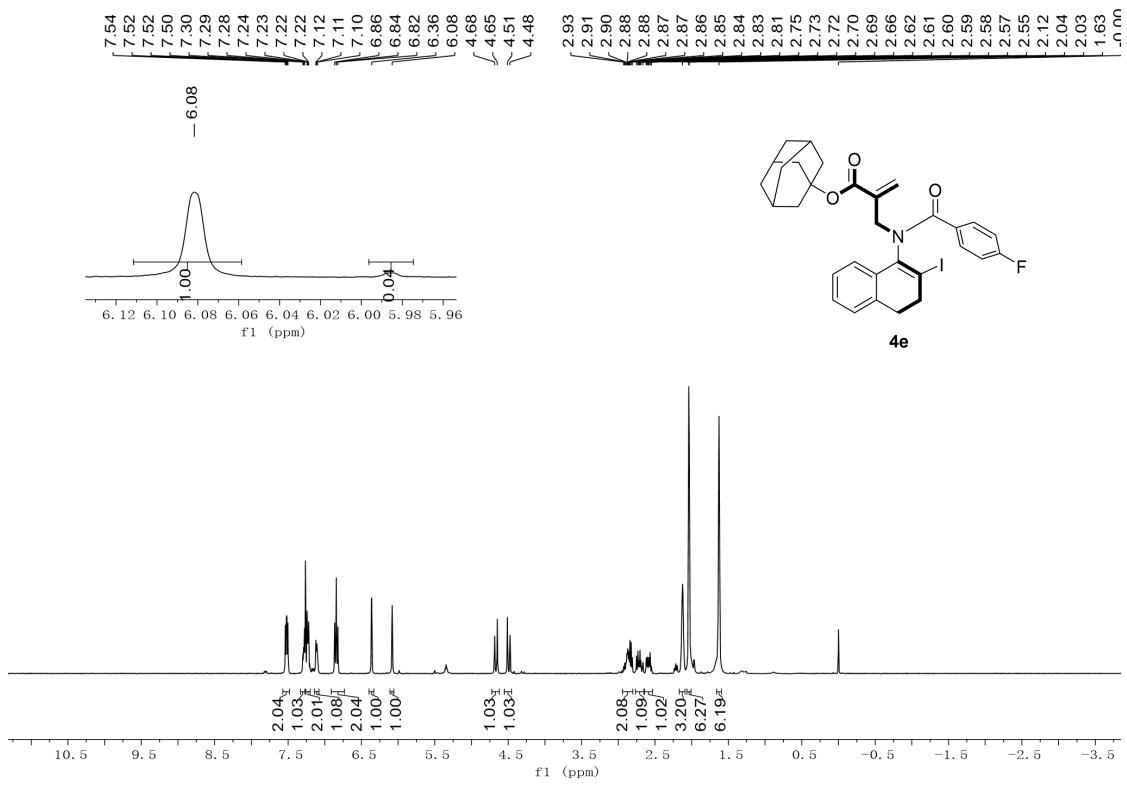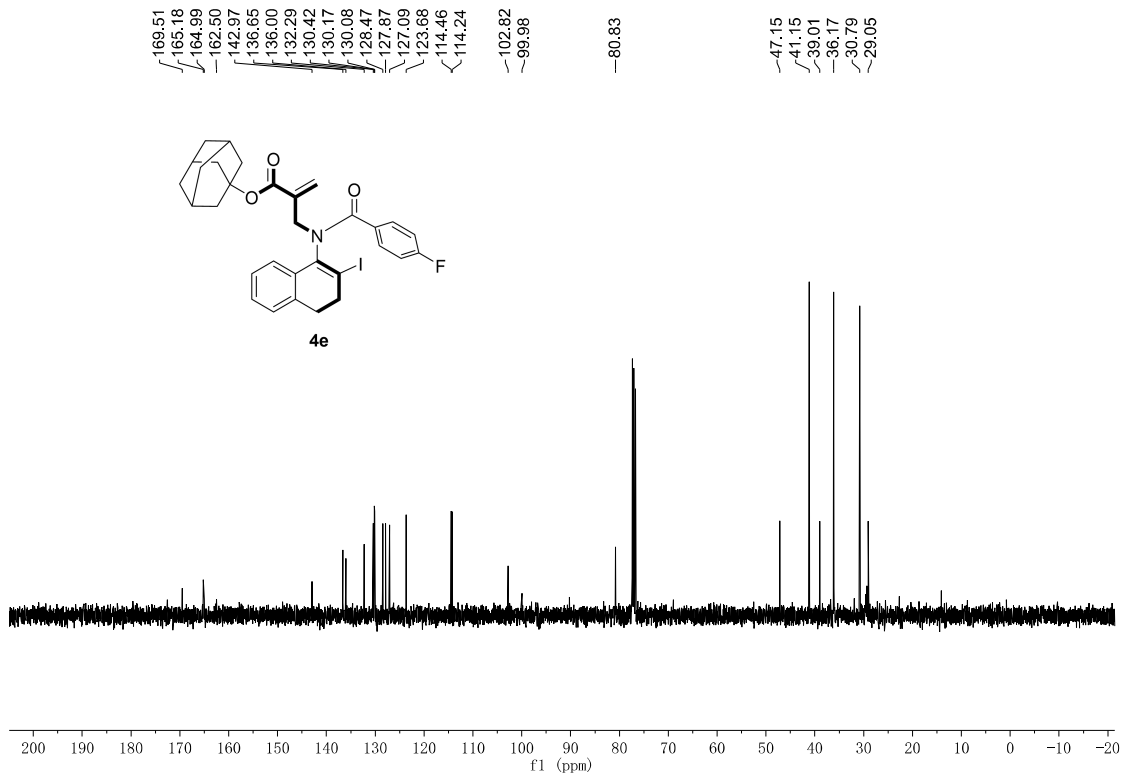

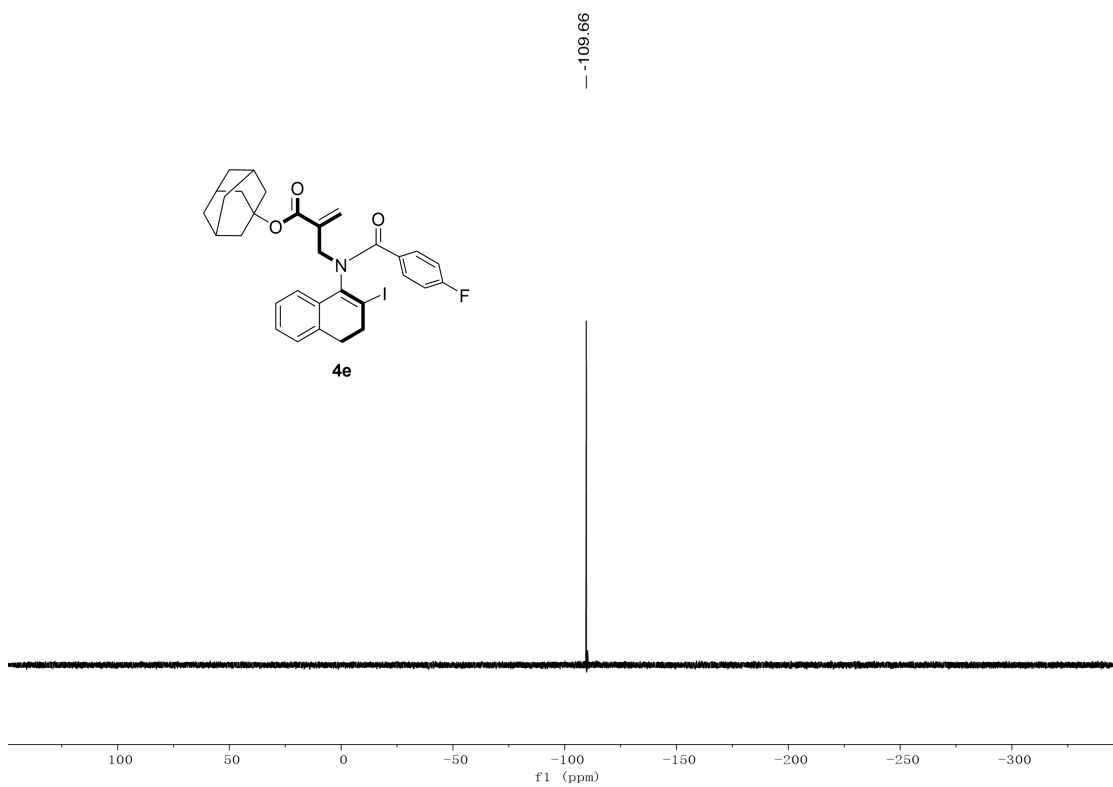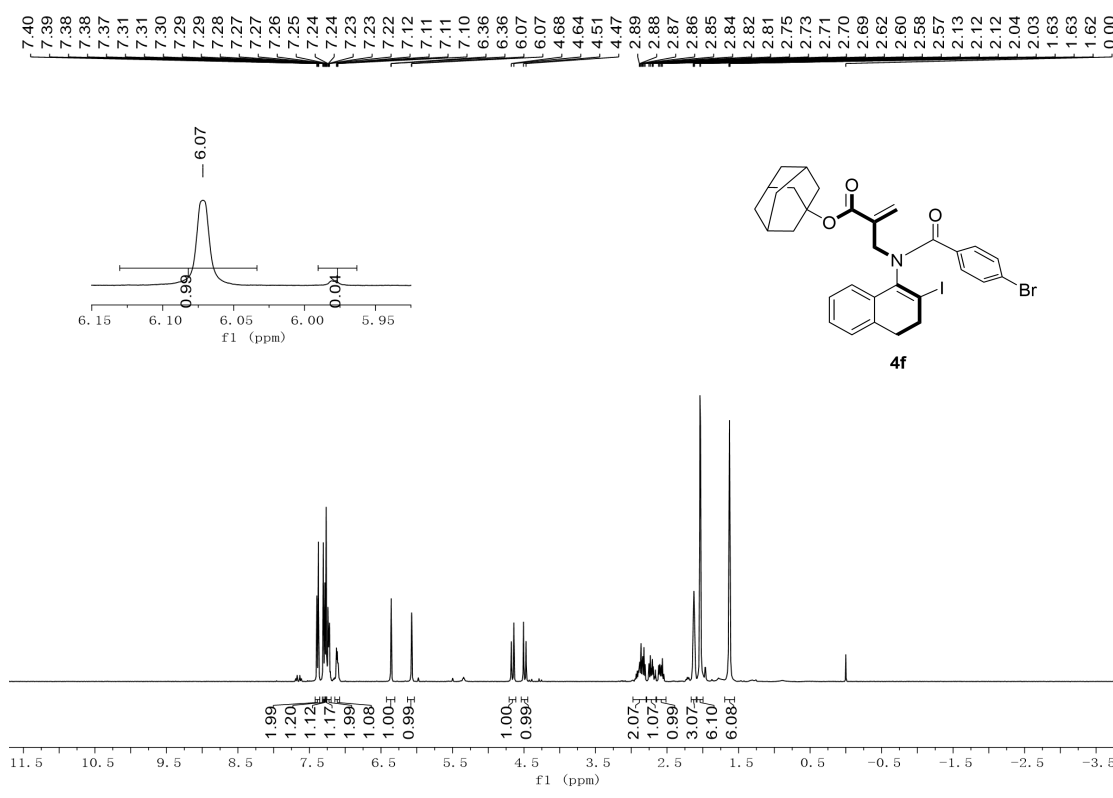

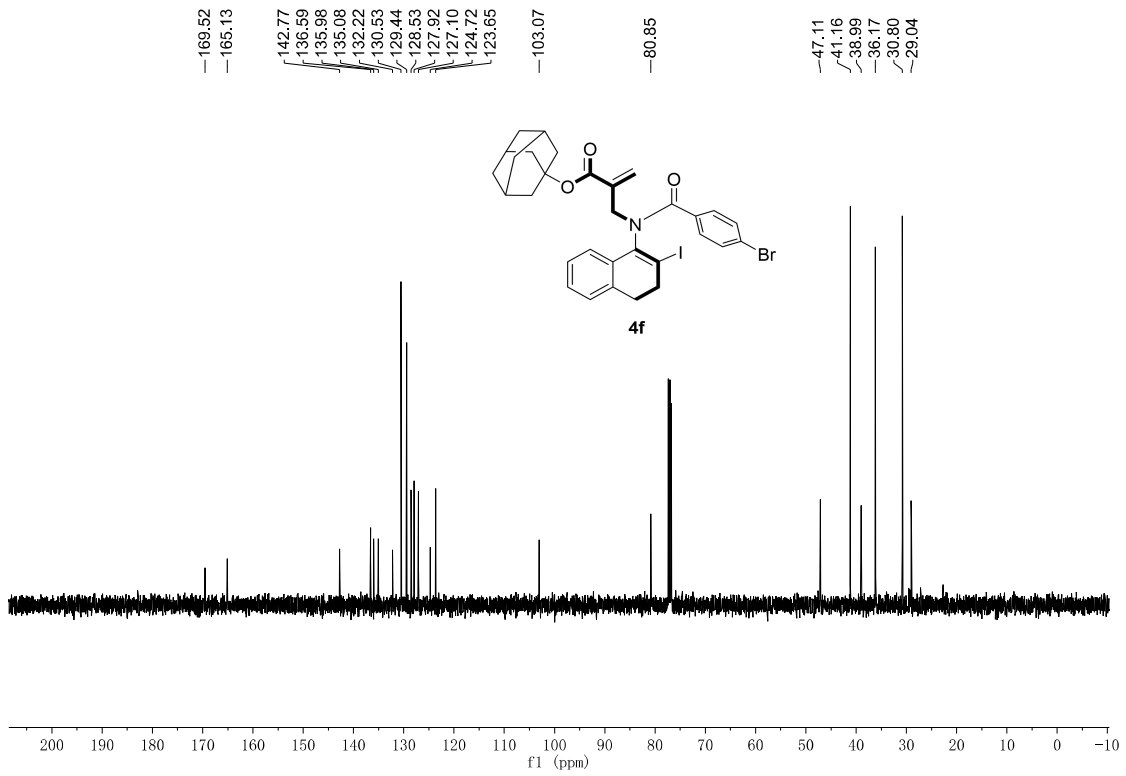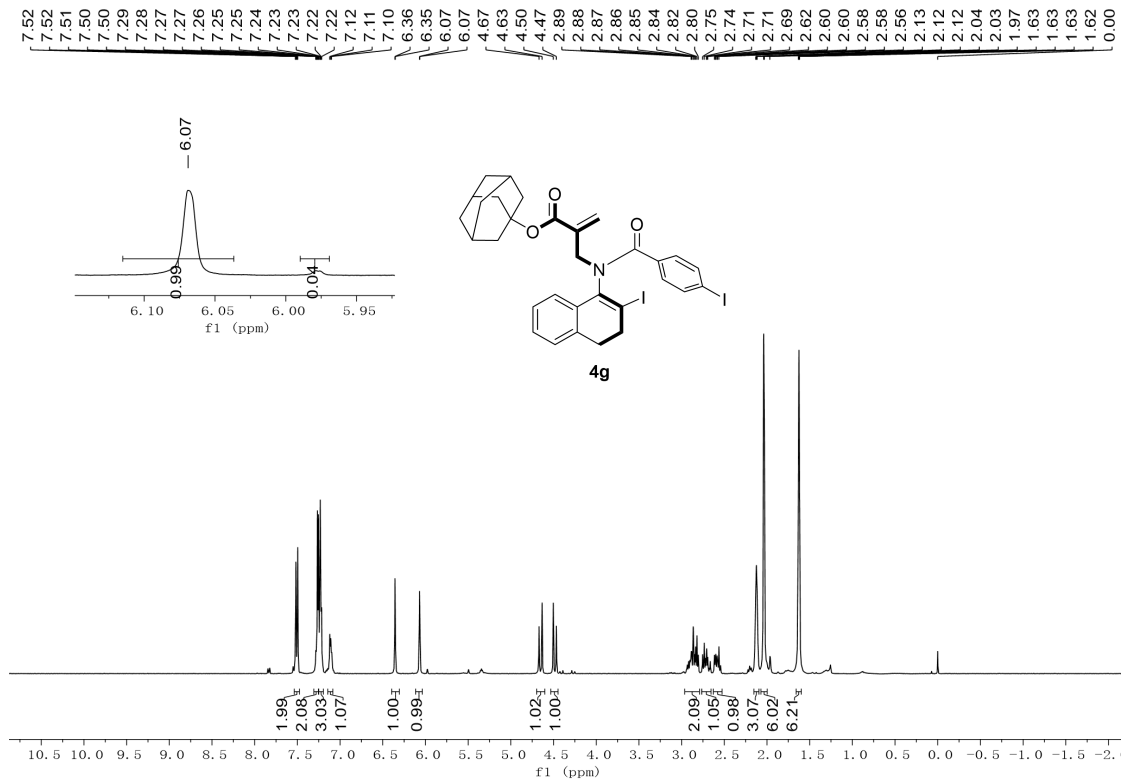

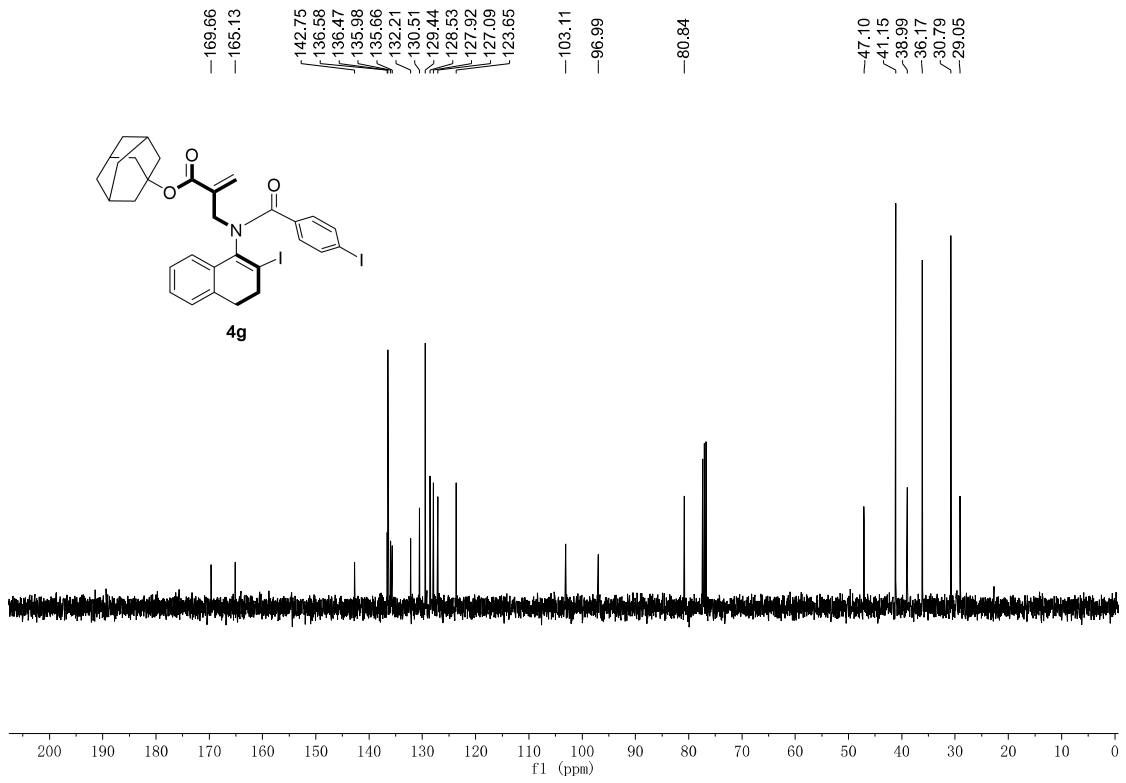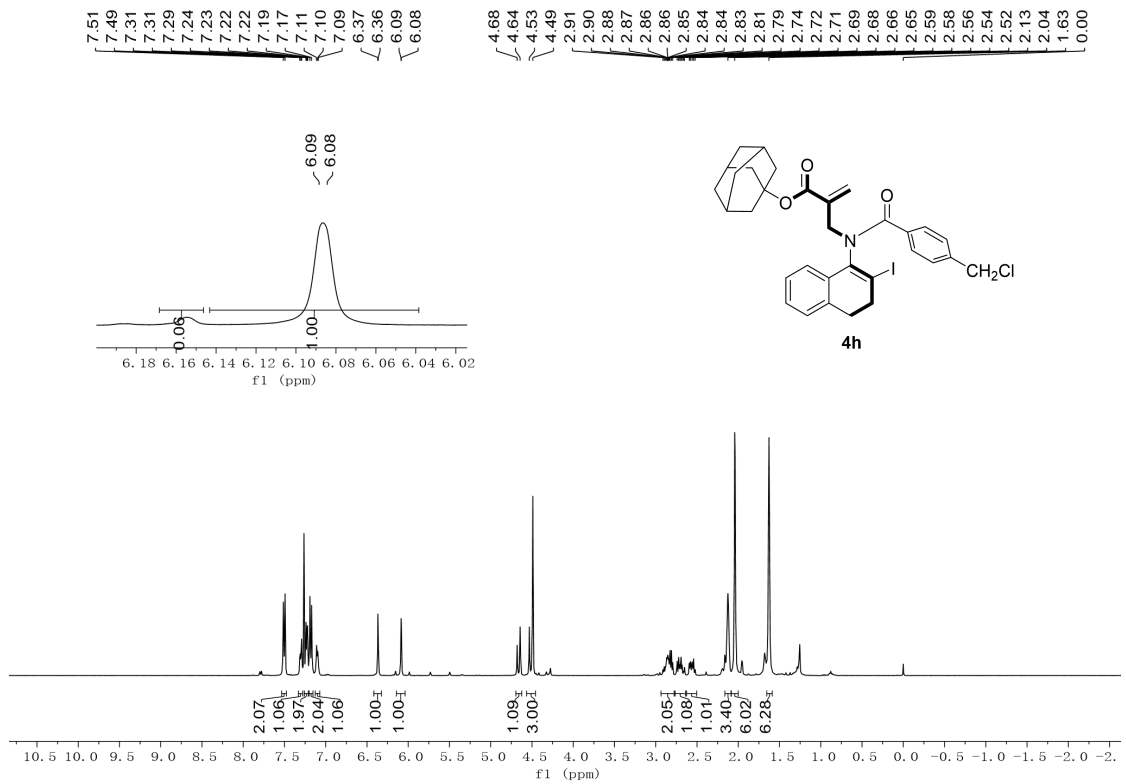

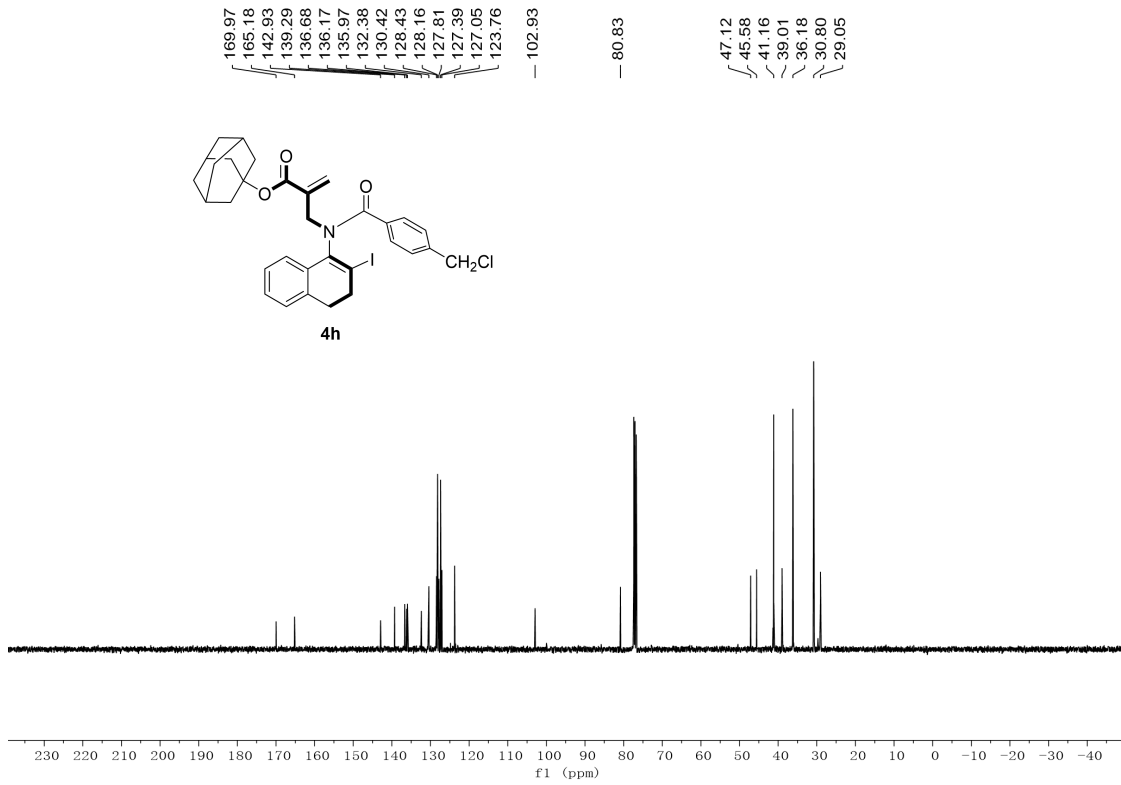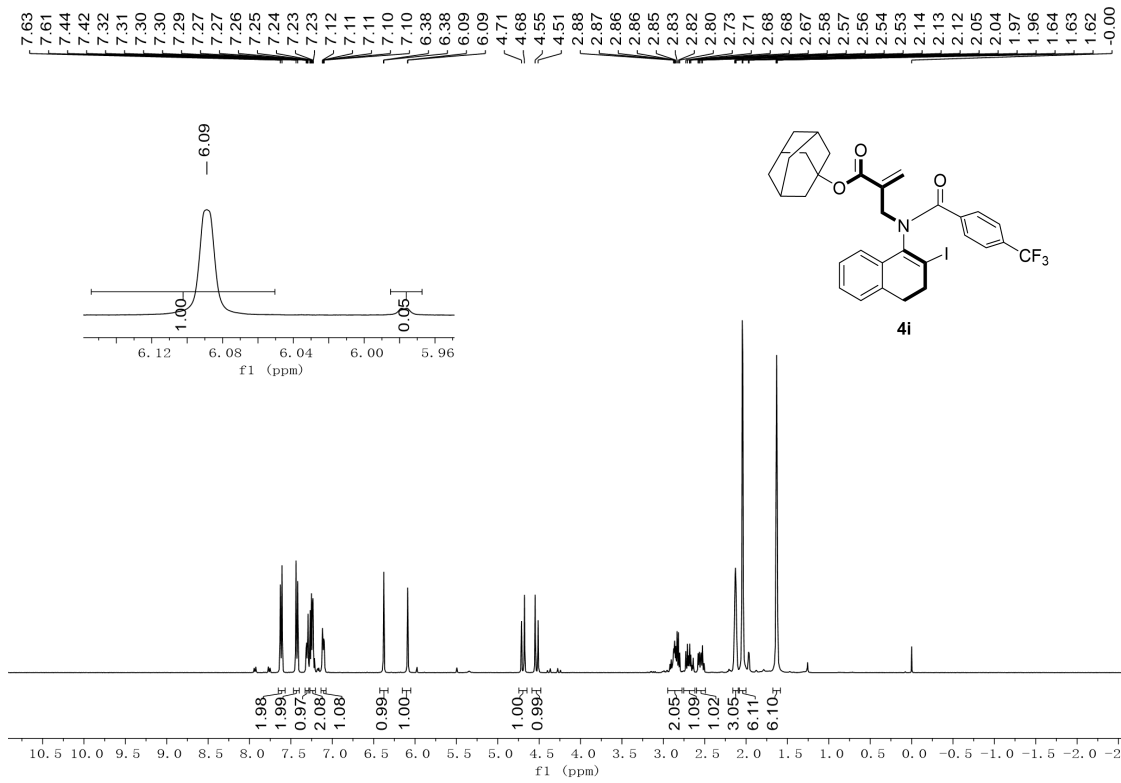

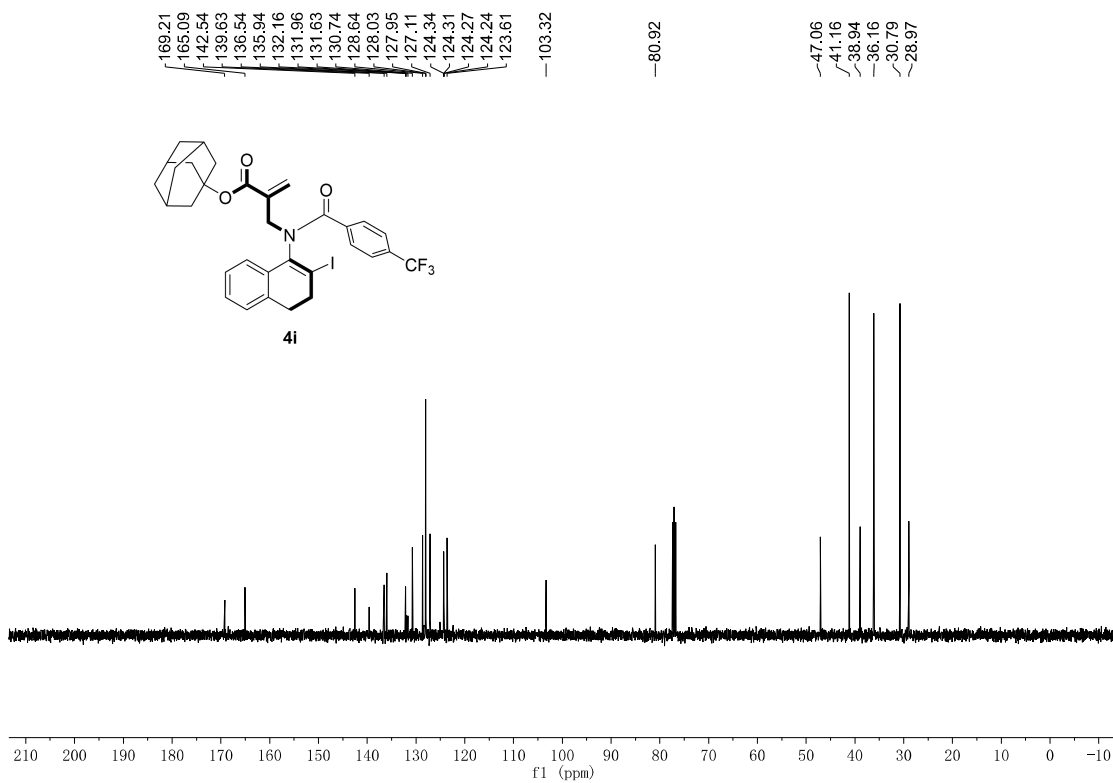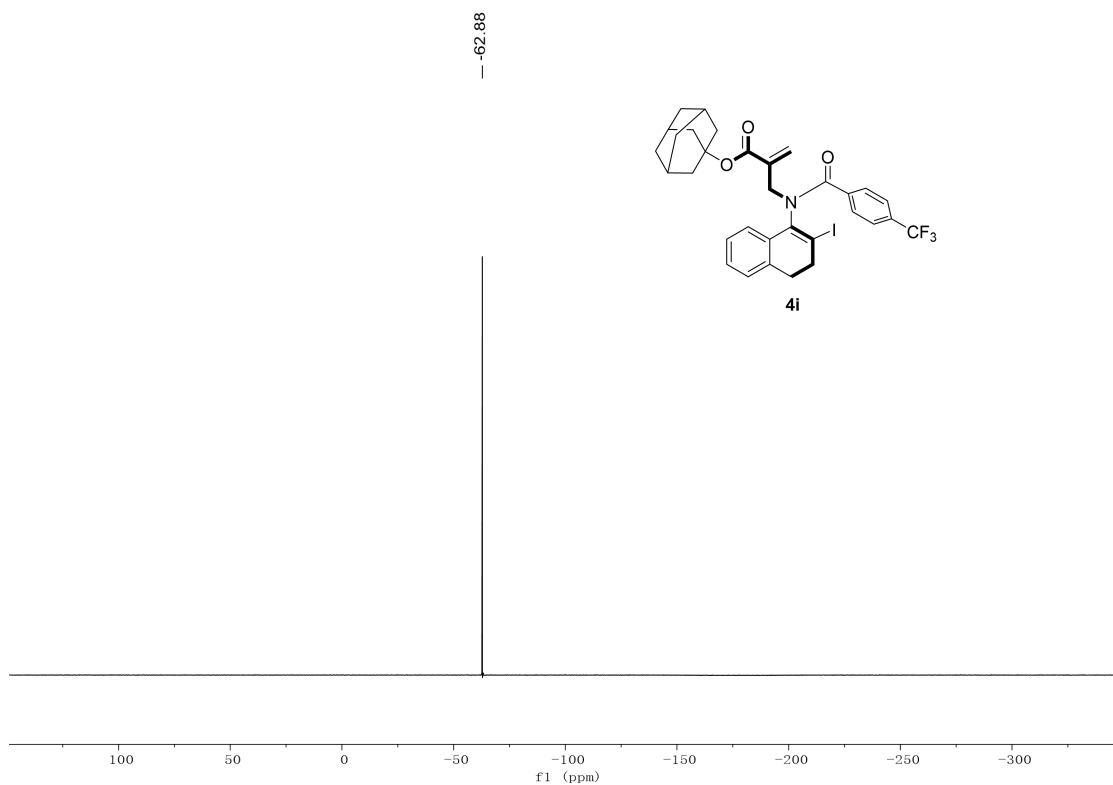



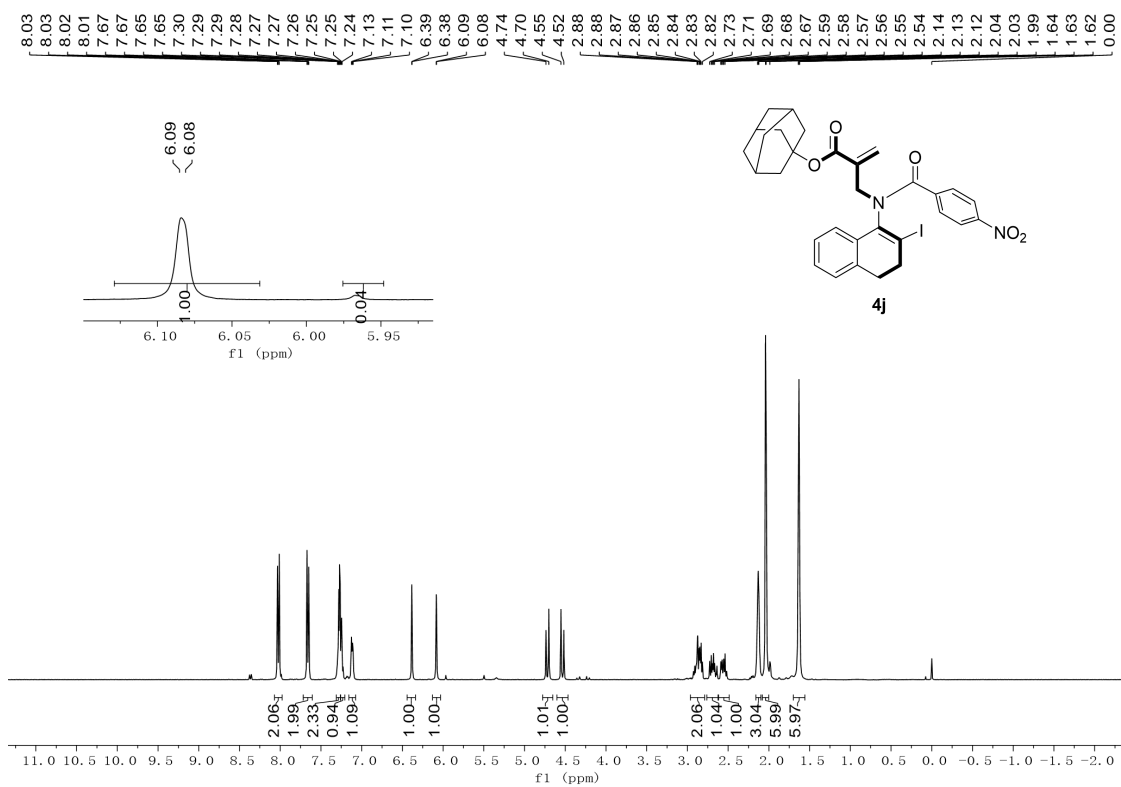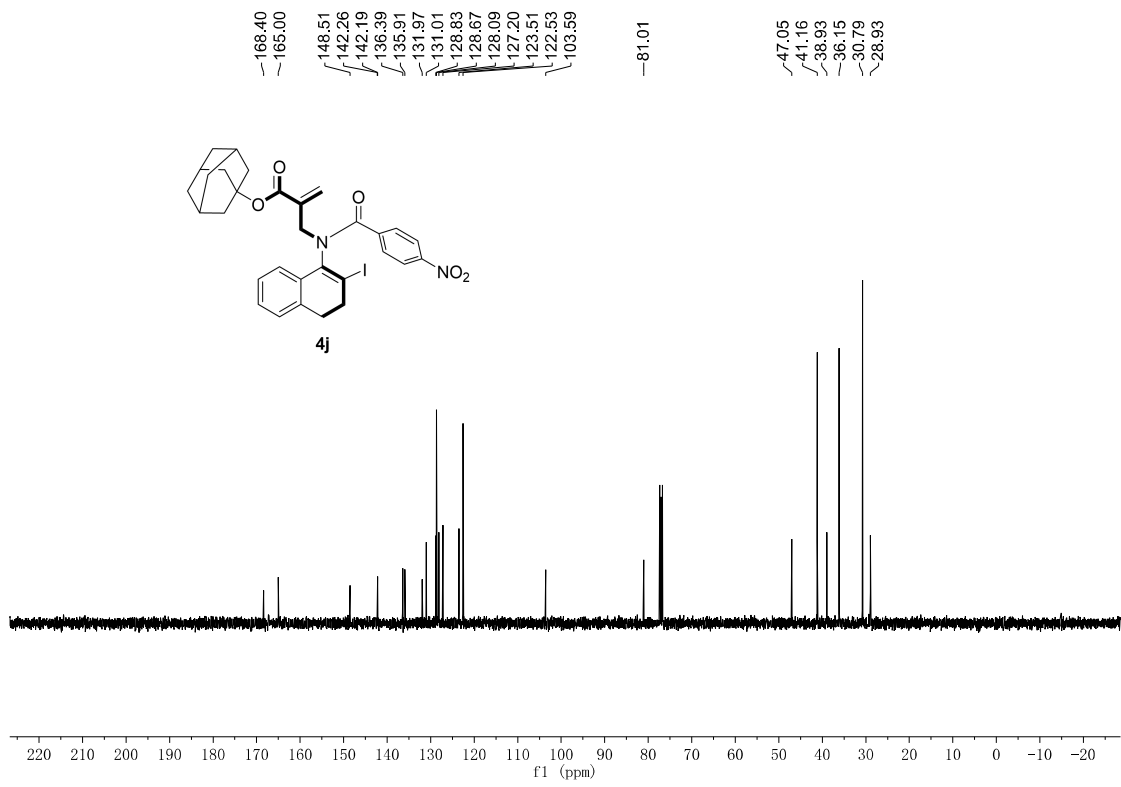

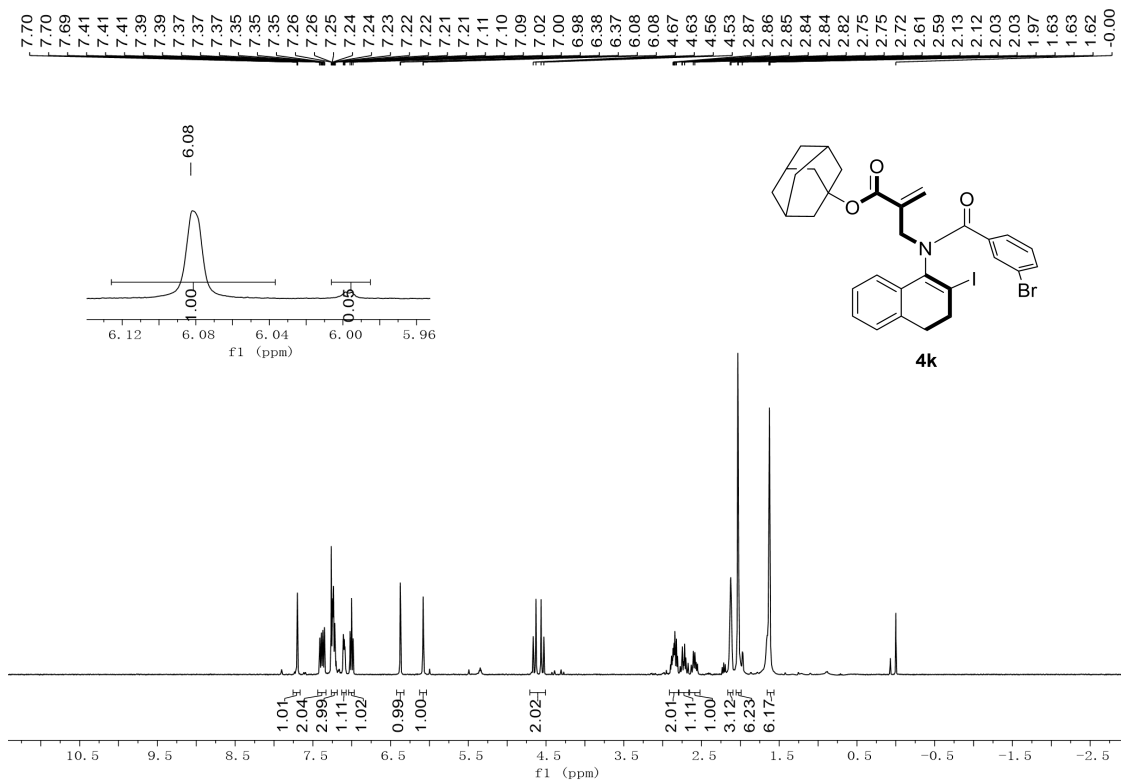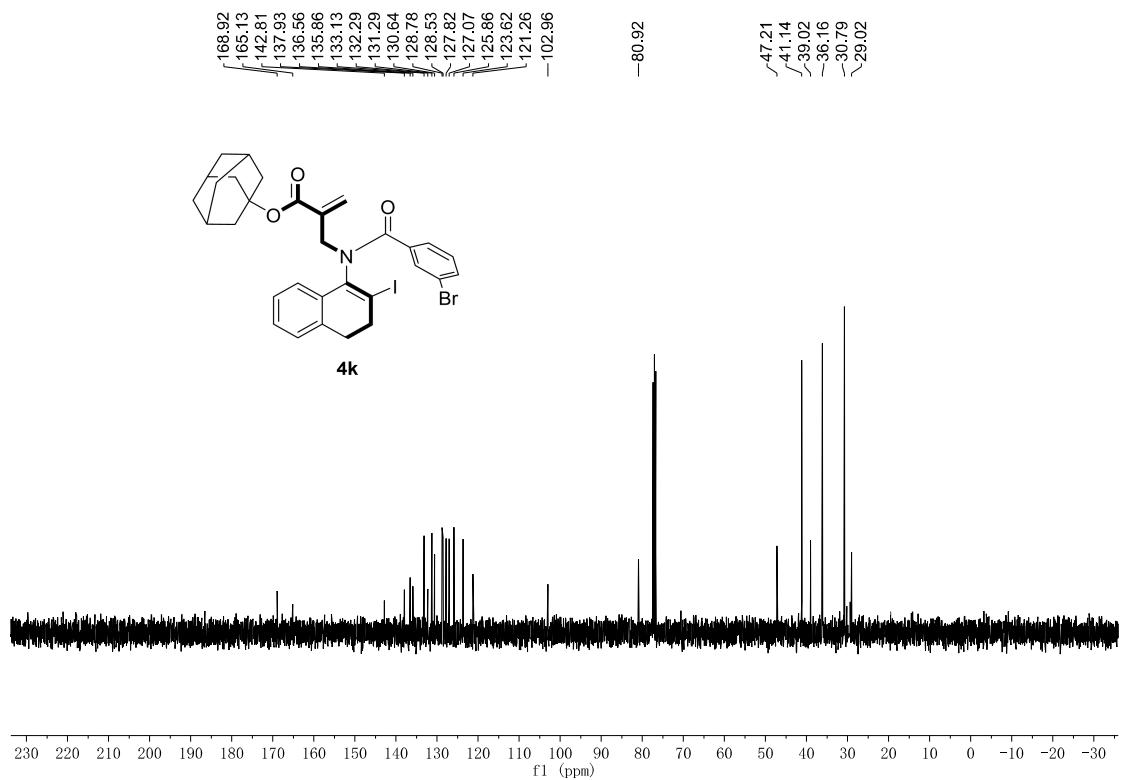

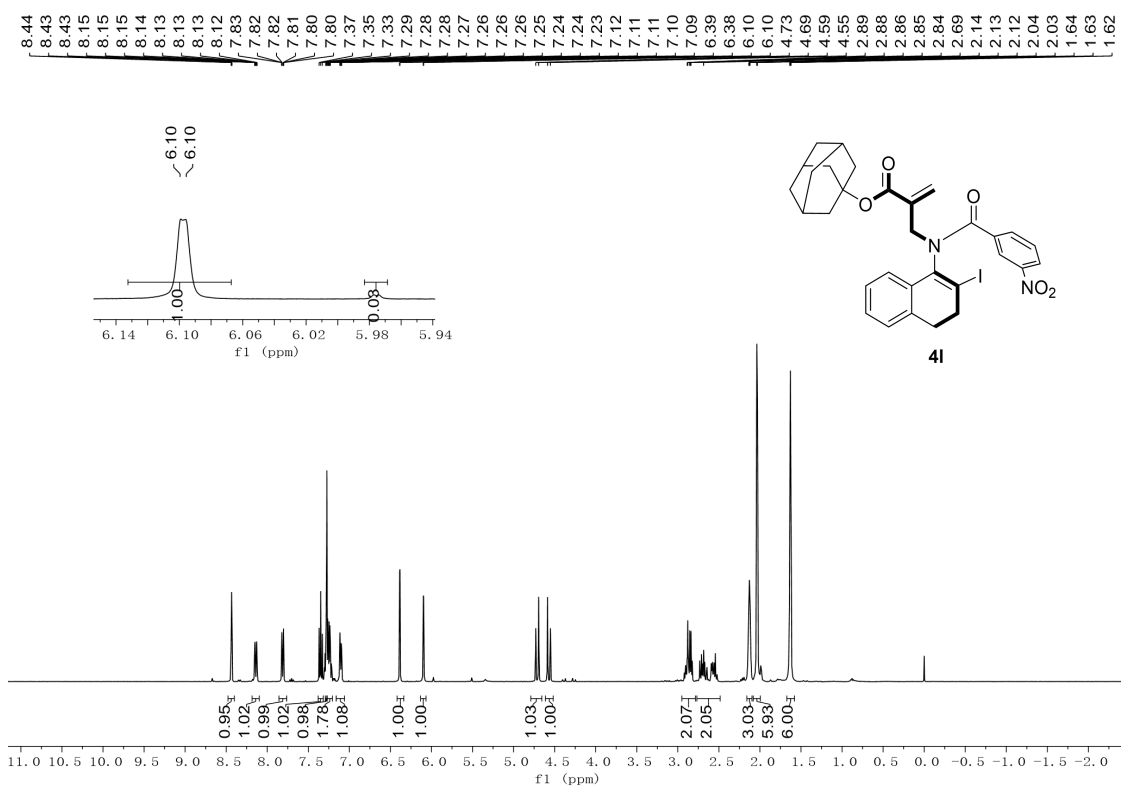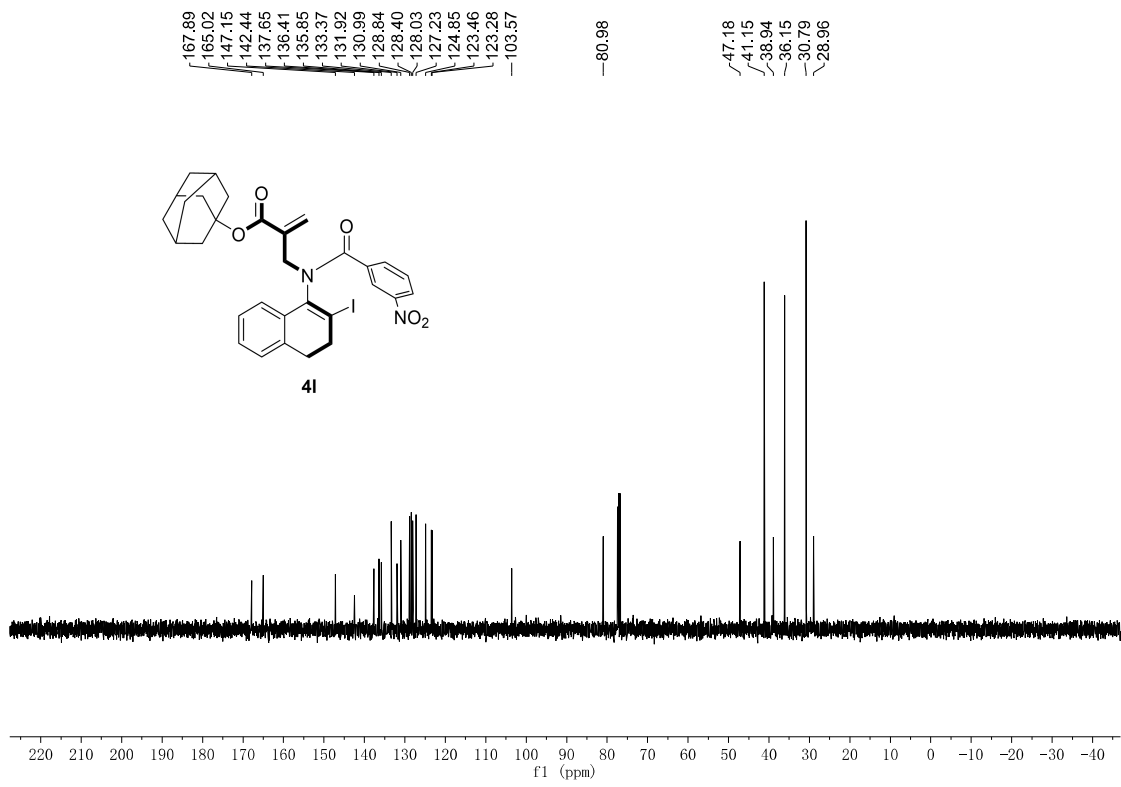

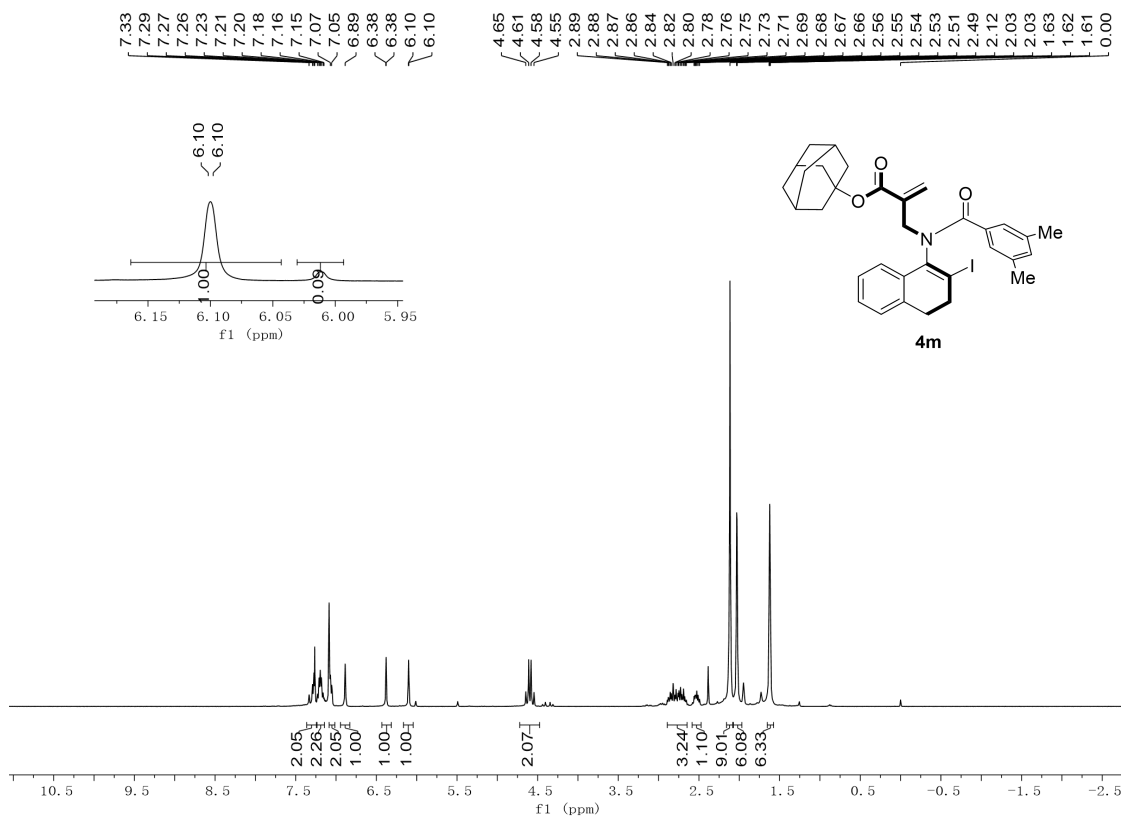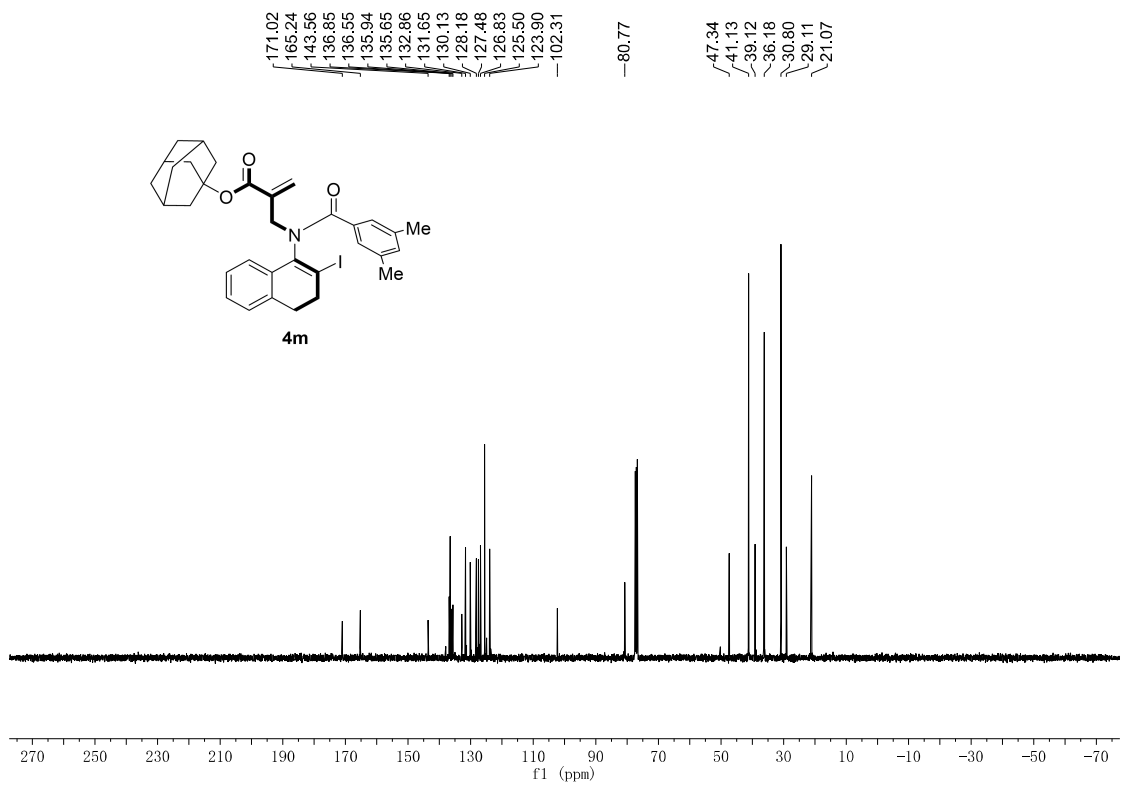

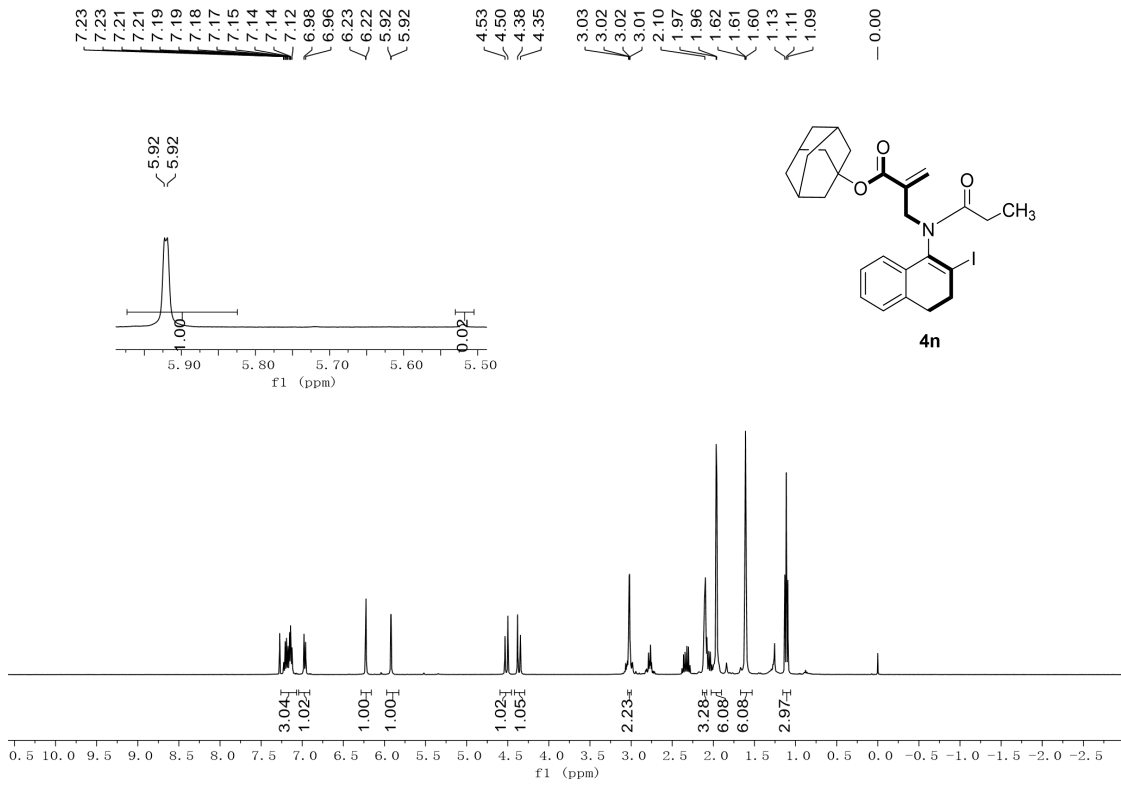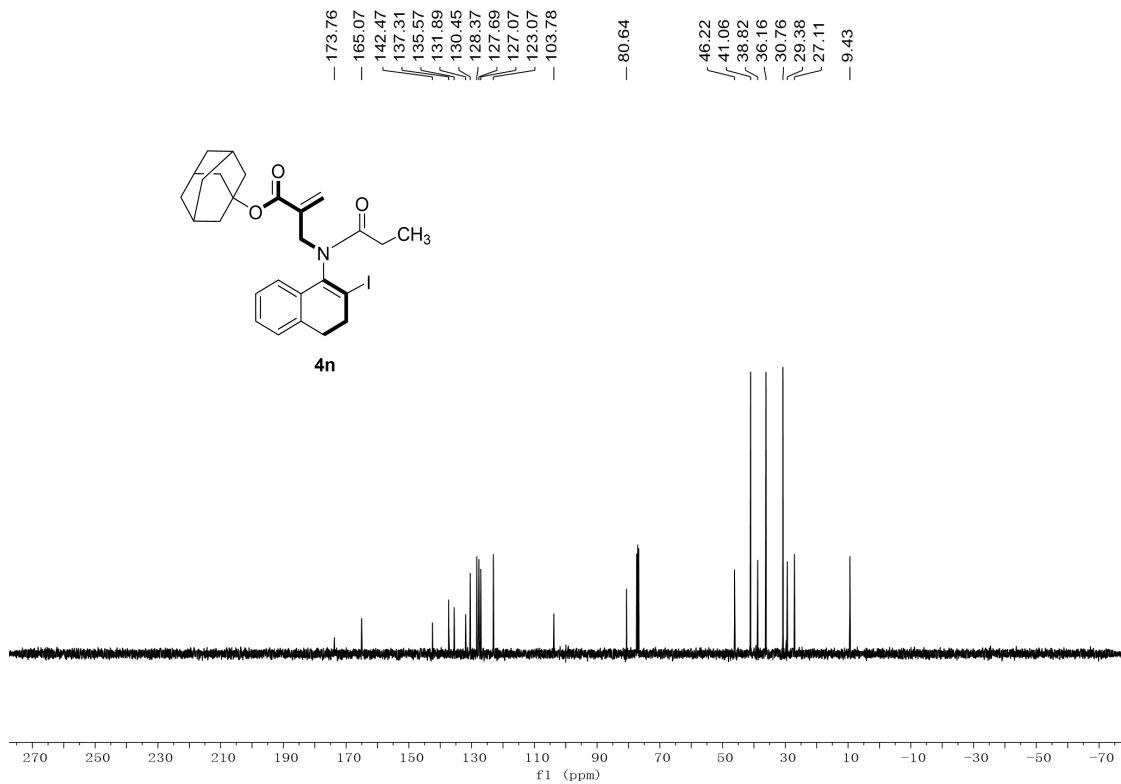

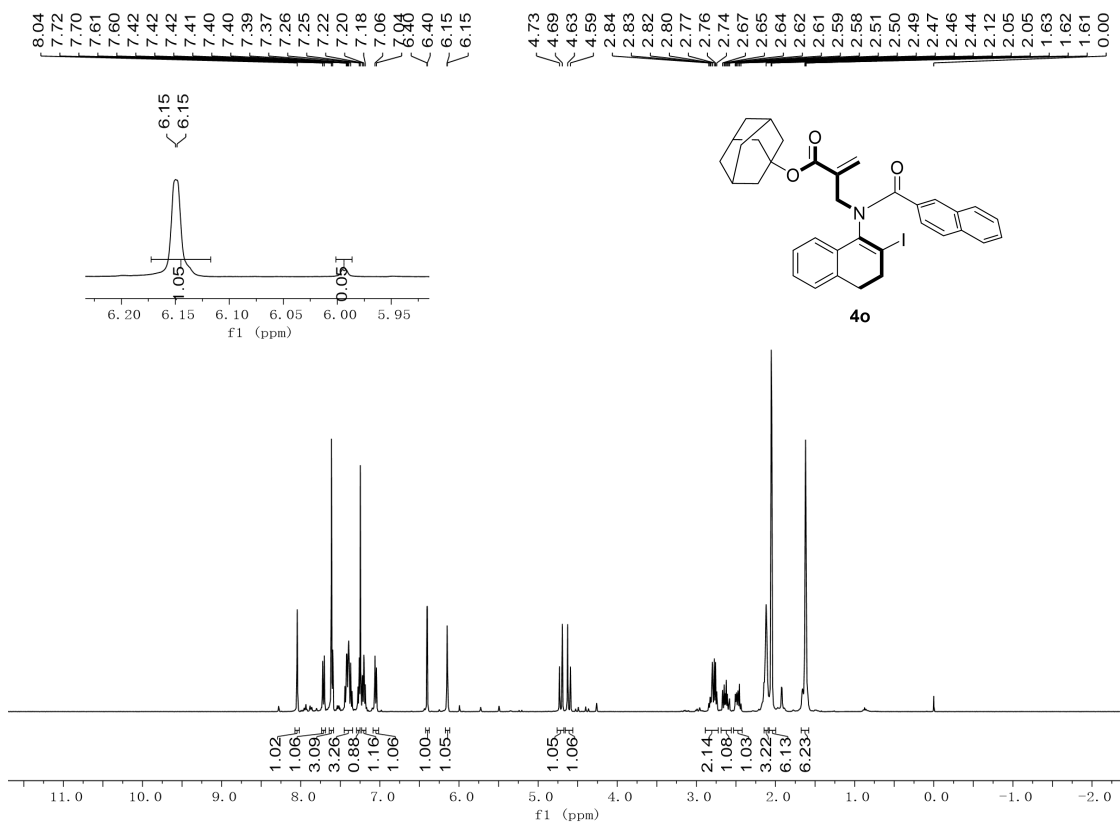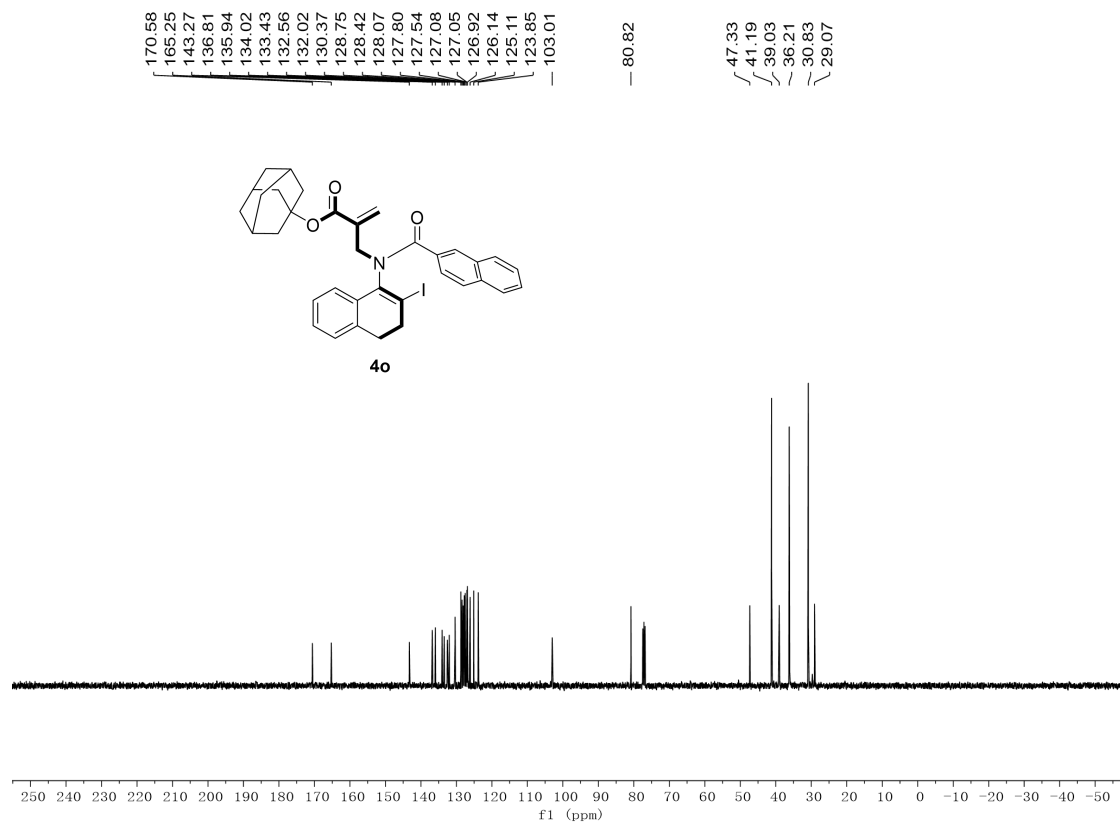

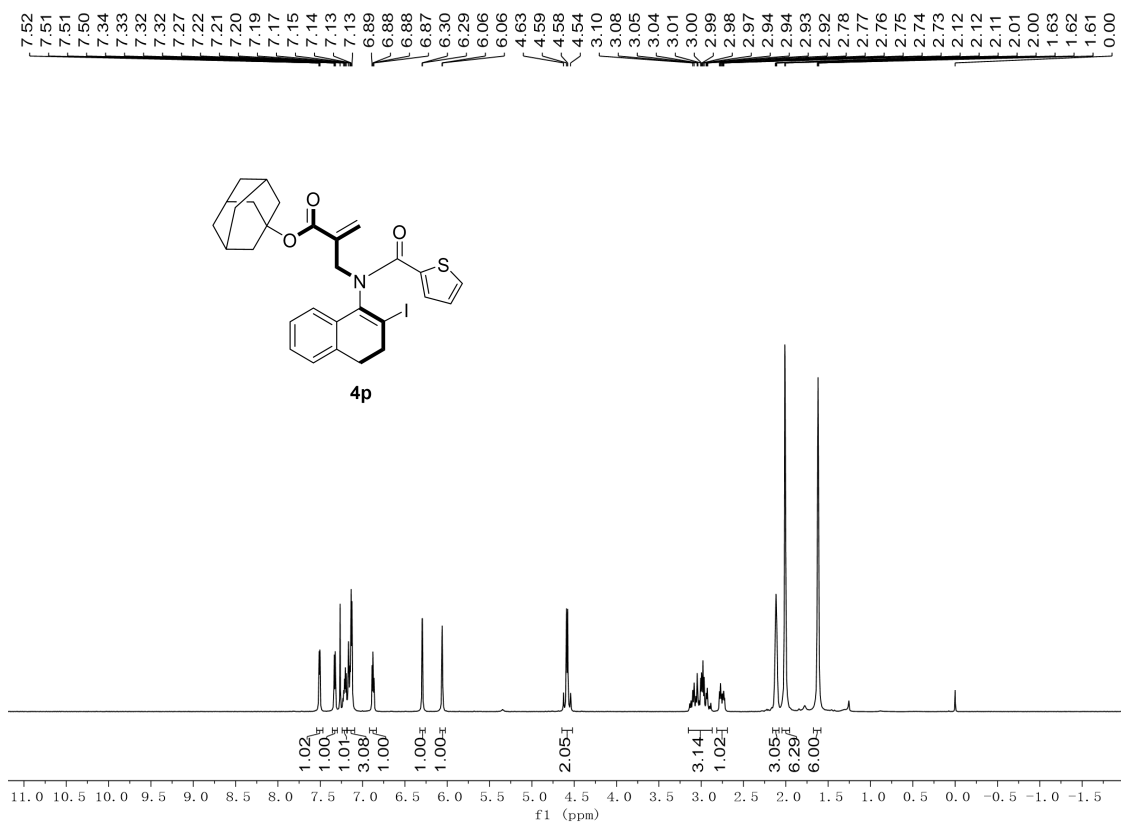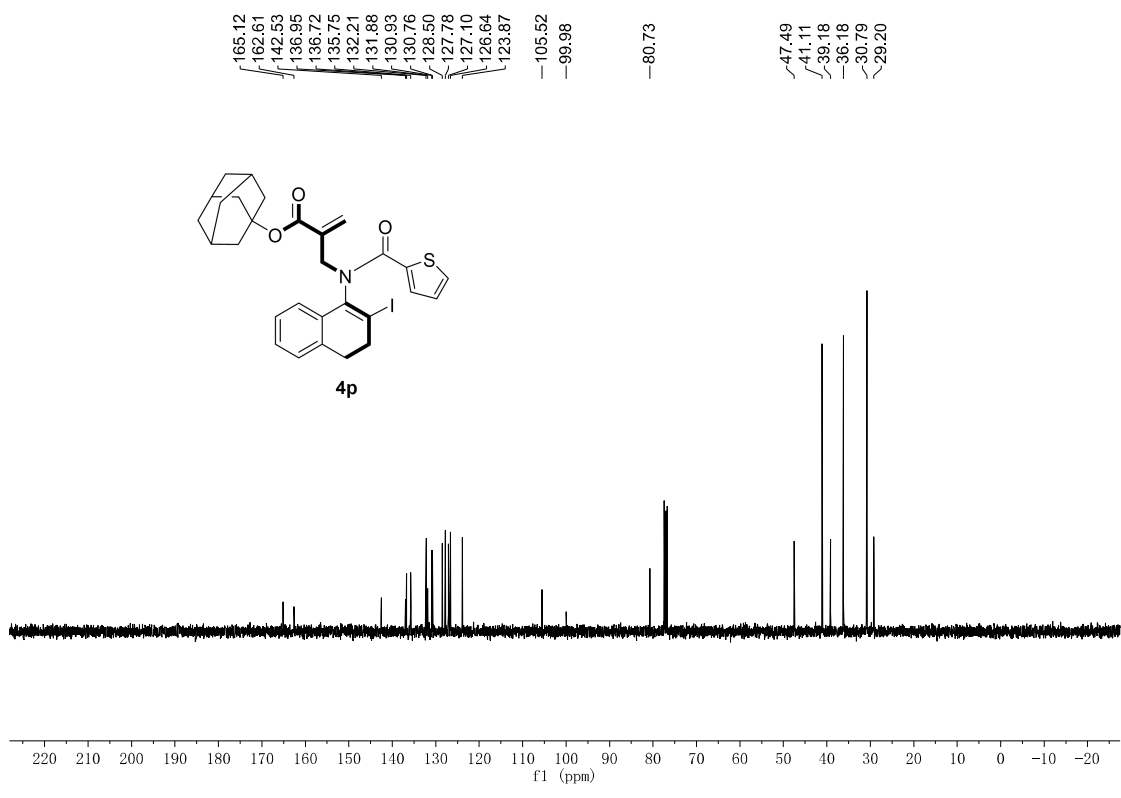

8.31  
8.29  
7.94  
7.92  
7.90  
7.88  
7.67  
7.65  
7.46  
7.44  
7.42  
7.41  
7.39  
7.37  
7.35  
7.13  
7.12  
6.98  
6.97  
6.96  
6.87  
6.86  
6.84  
6.47  
6.46  
6.25  
6.25  
4.93  
4.89  
4.81  
4.77  
2.84  
2.82  
2.81  
2.80  
2.78  
2.75  
2.73  
2.71  
2.69  
2.60  
2.58  
2.56  
2.54  
2.53  
2.43  
2.41  
2.40  
2.39  
2.38  
2.10  
2.01  
2.00  
1.61  
1.60  
0.00

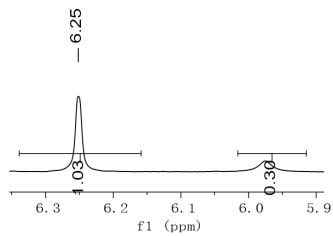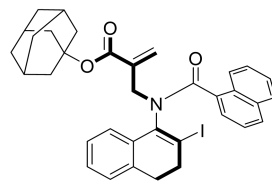

4q

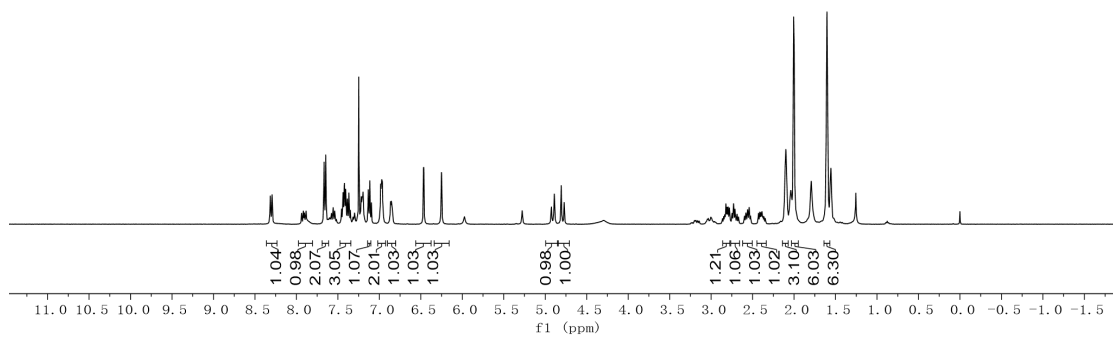

169.94  
165.24  
143.45  
137.38  
135.28  
133.51  
132.82  
132.63  
130.99  
130.75  
130.02  
127.95  
127.93  
127.17  
127.10  
126.56  
126.17  
125.80  
124.04  
123.89  
123.43  
-102.20  
-80.93  
-47.20  
-41.10  
-39.18  
-36.07  
-30.80  
-29.05

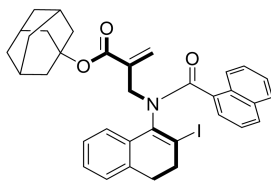

4q

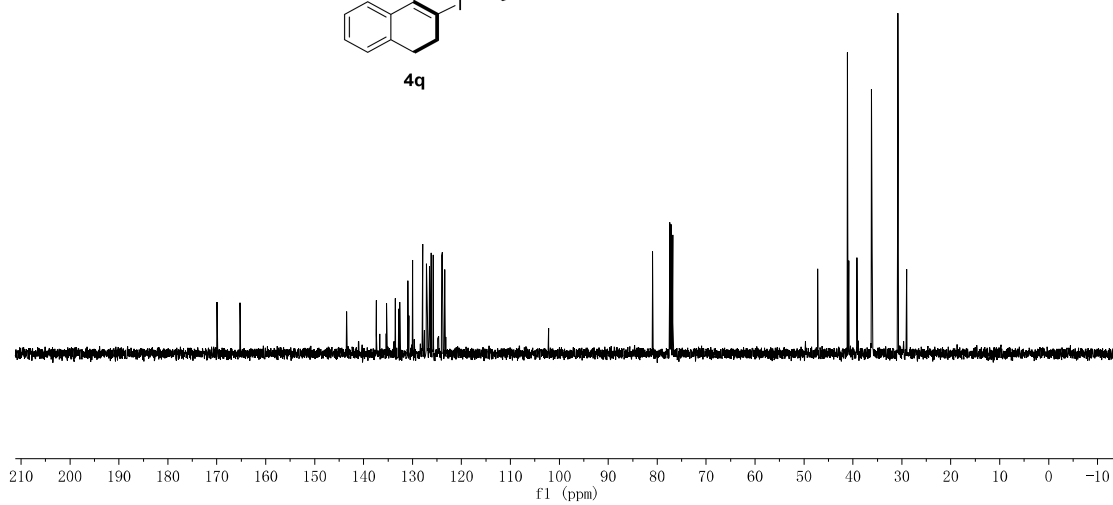



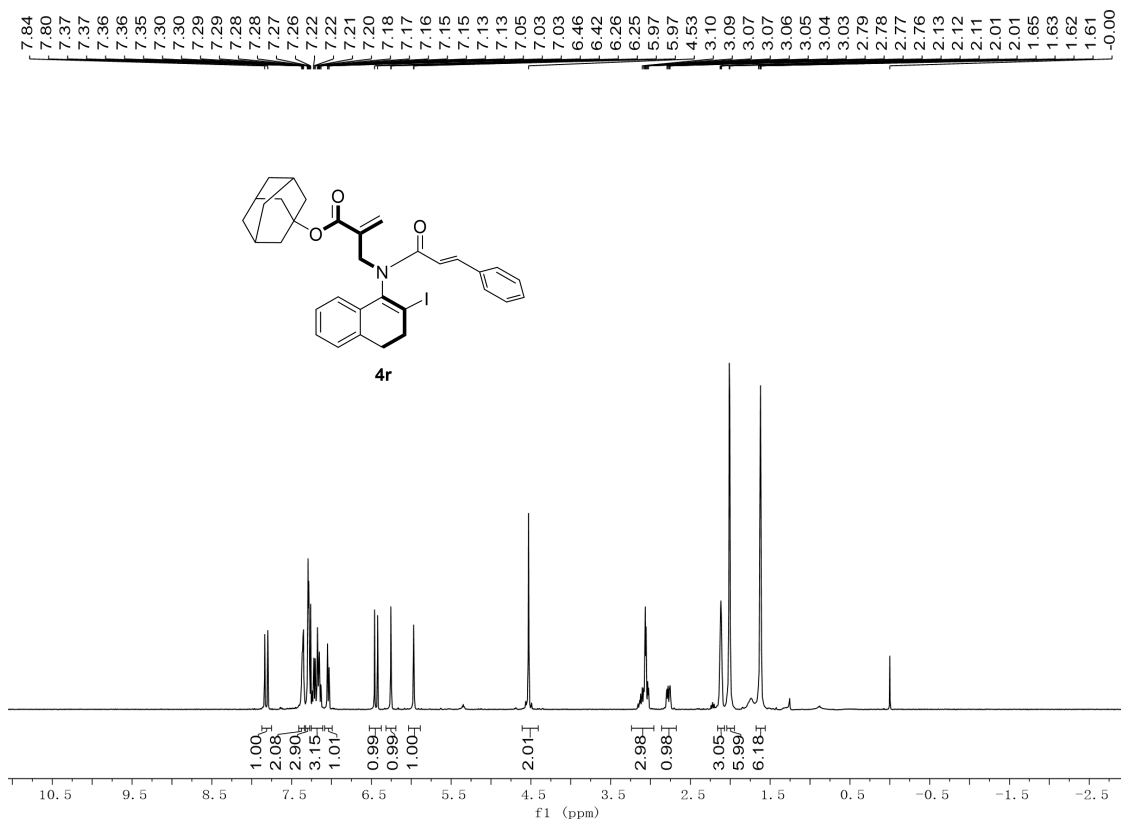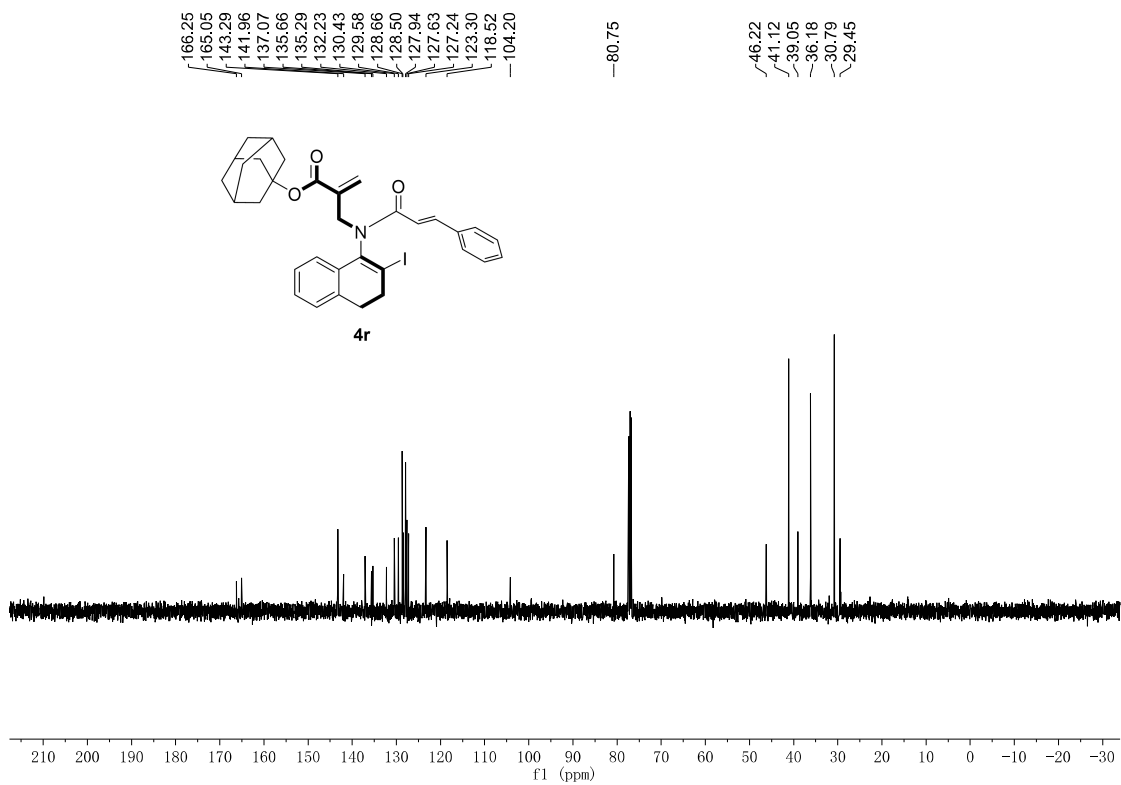

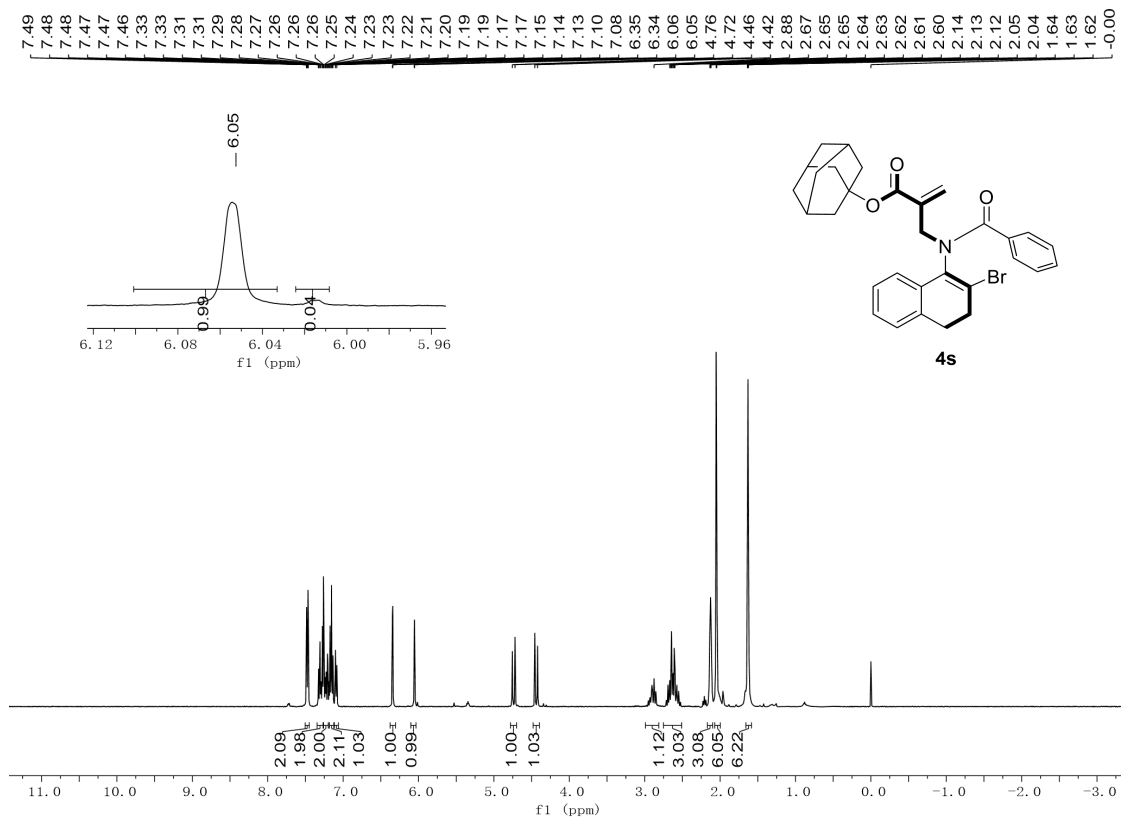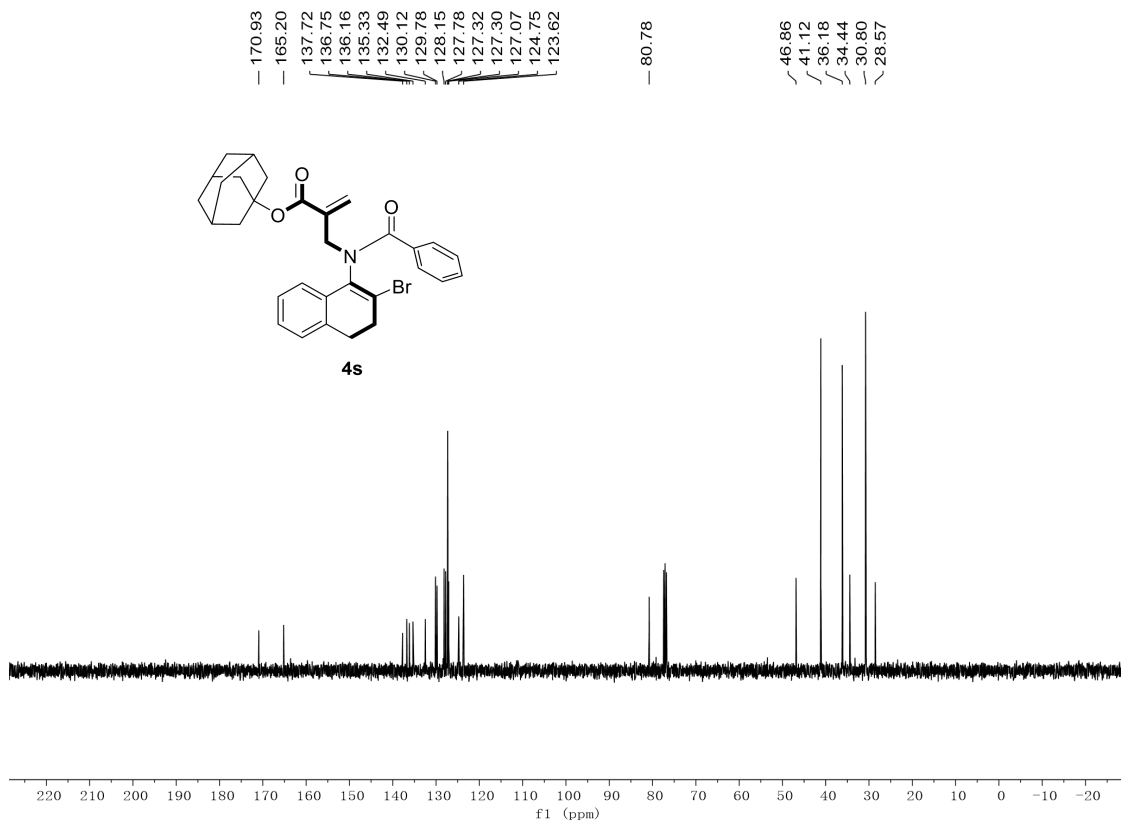

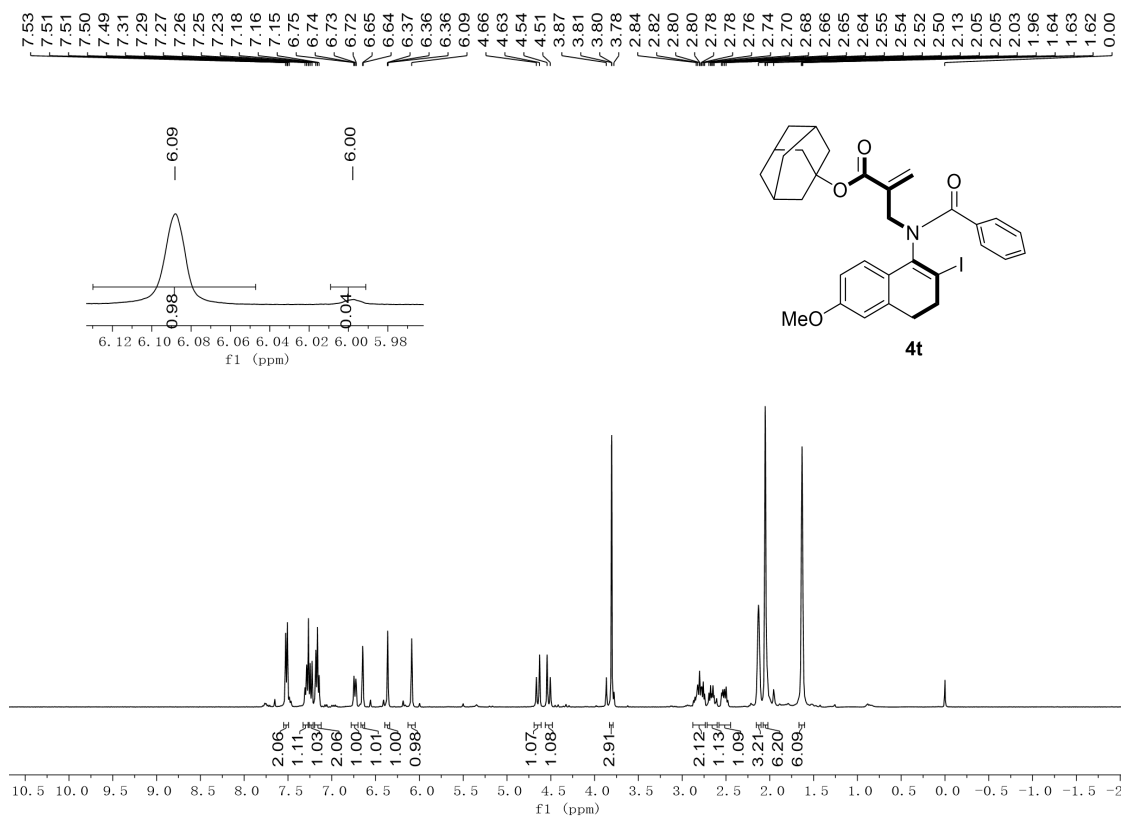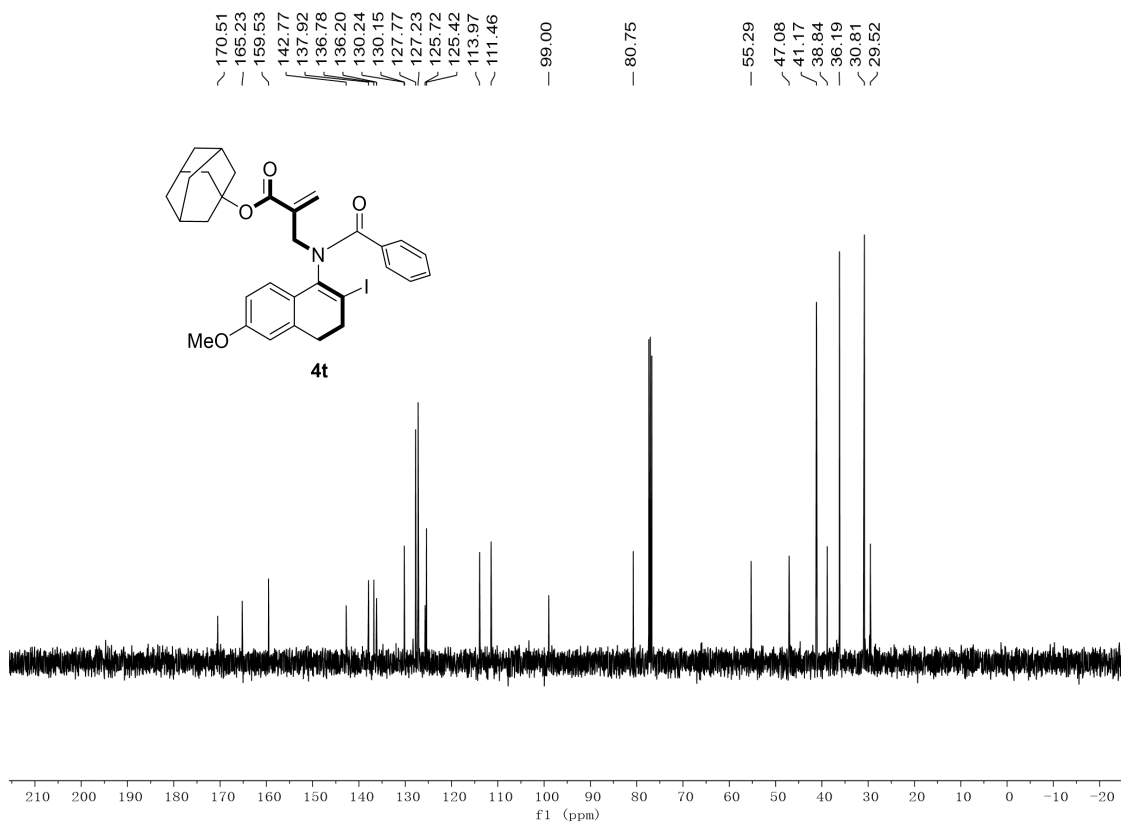



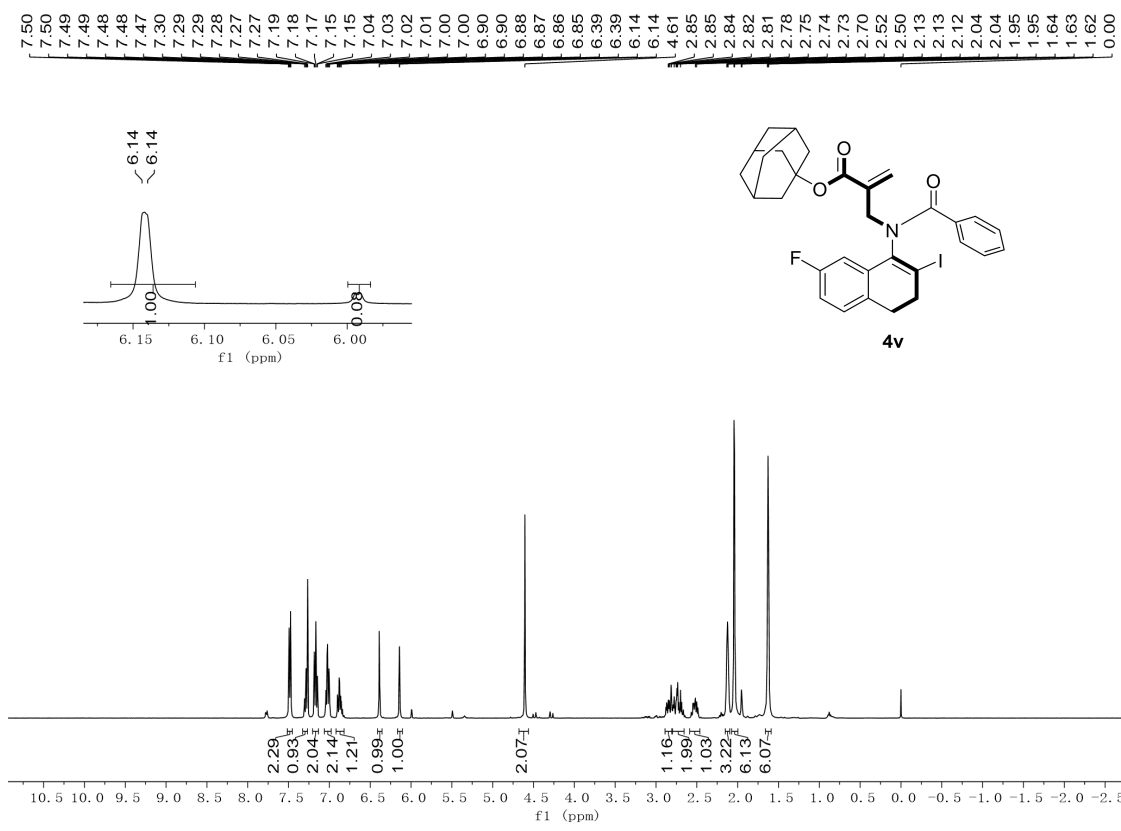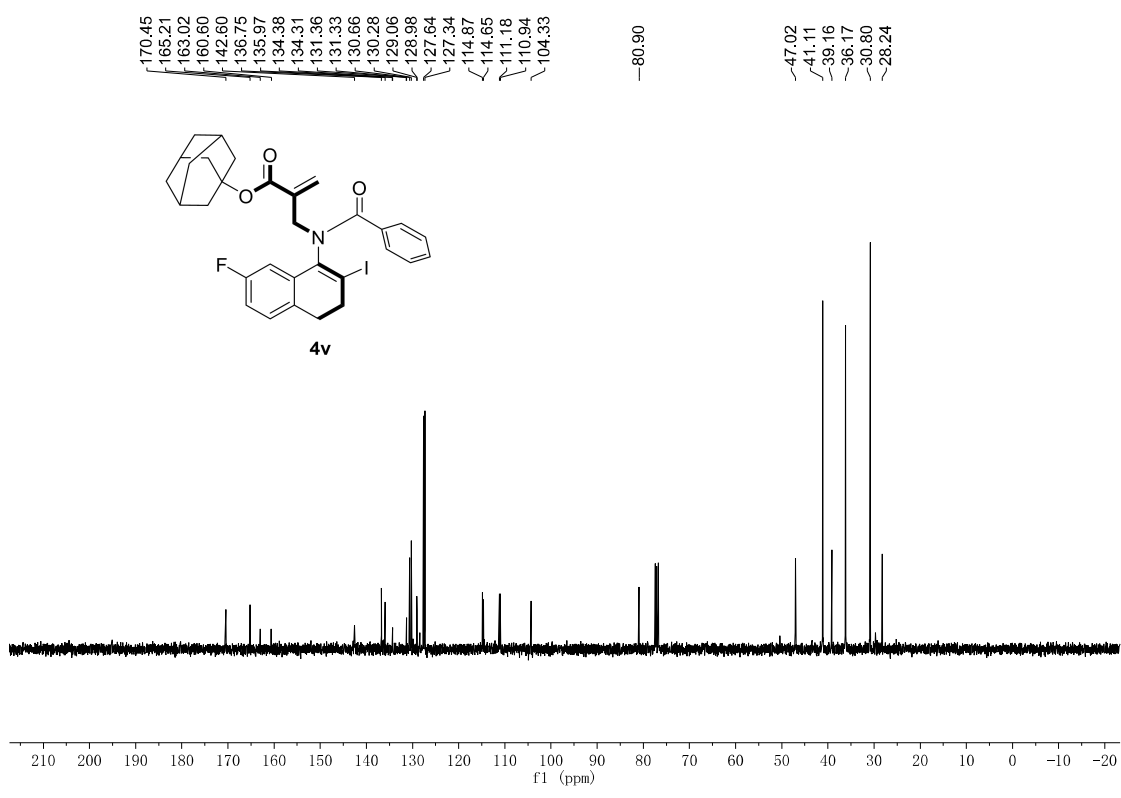

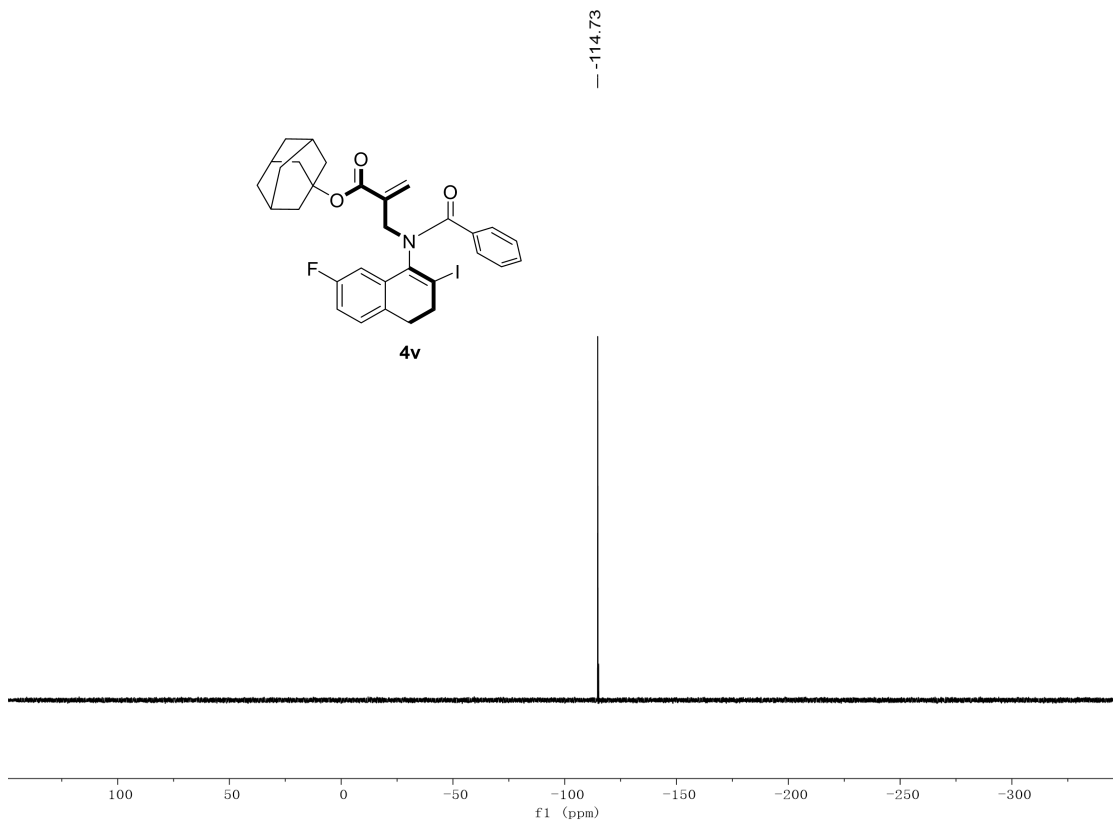

7.49  
7.48  
7.48  
7.46  
7.46  
7.41  
7.40  
7.32  
7.32  
7.31  
7.30  
7.30  
7.29  
7.28  
7.27  
7.26  
7.20  
7.18  
7.16  
7.16  
6.96  
6.94  
6.41  
6.41  
6.19  
6.19  
4.68  
4.64  
4.56  
4.52  
2.87  
2.85  
2.85  
2.84  
2.82  
2.81  
2.79  
2.78  
2.75  
2.74  
2.73  
2.72  
2.70  
2.68  
2.52  
2.50  
2.49  
2.22  
2.12  
2.03  
2.02  
2.00  
1.95  
1.63  
1.62  
0.00

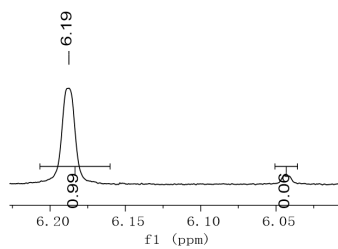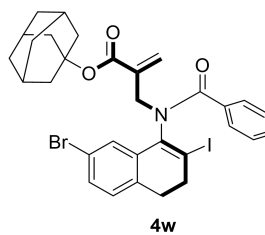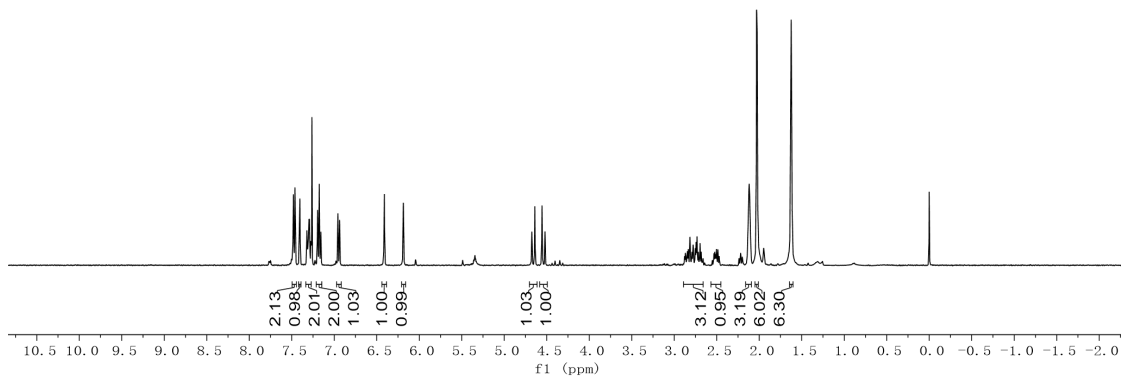

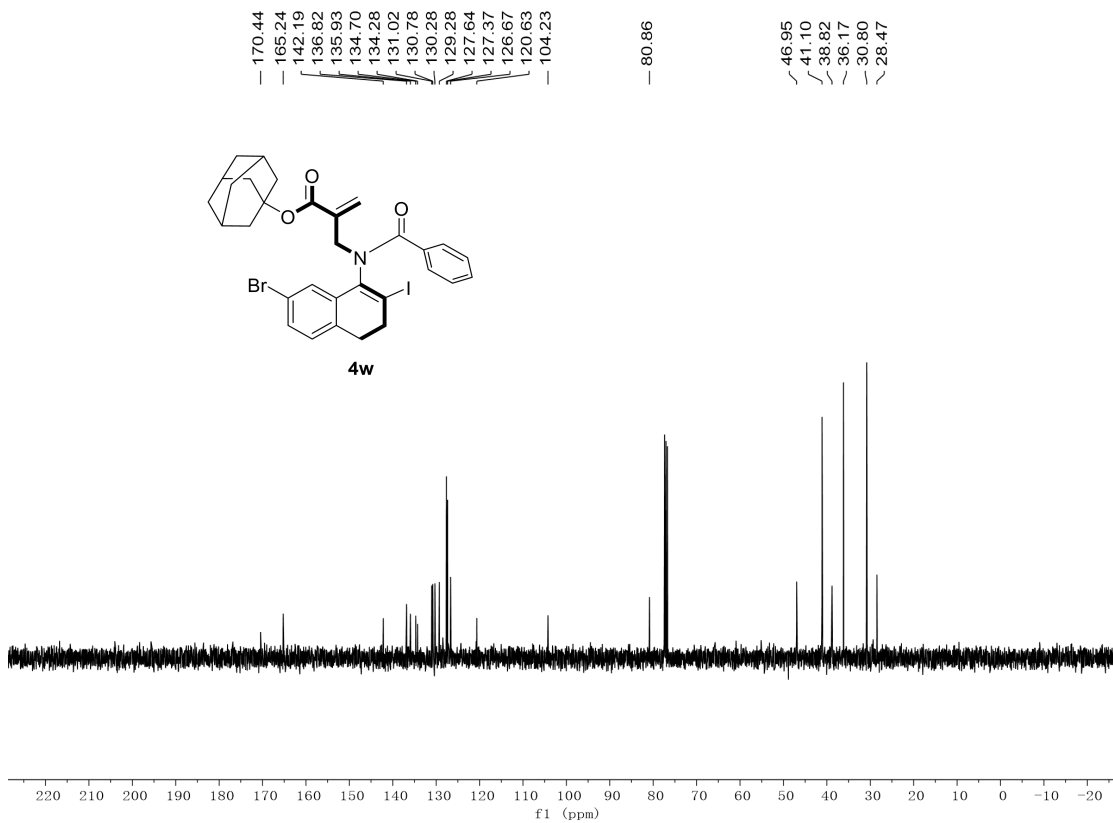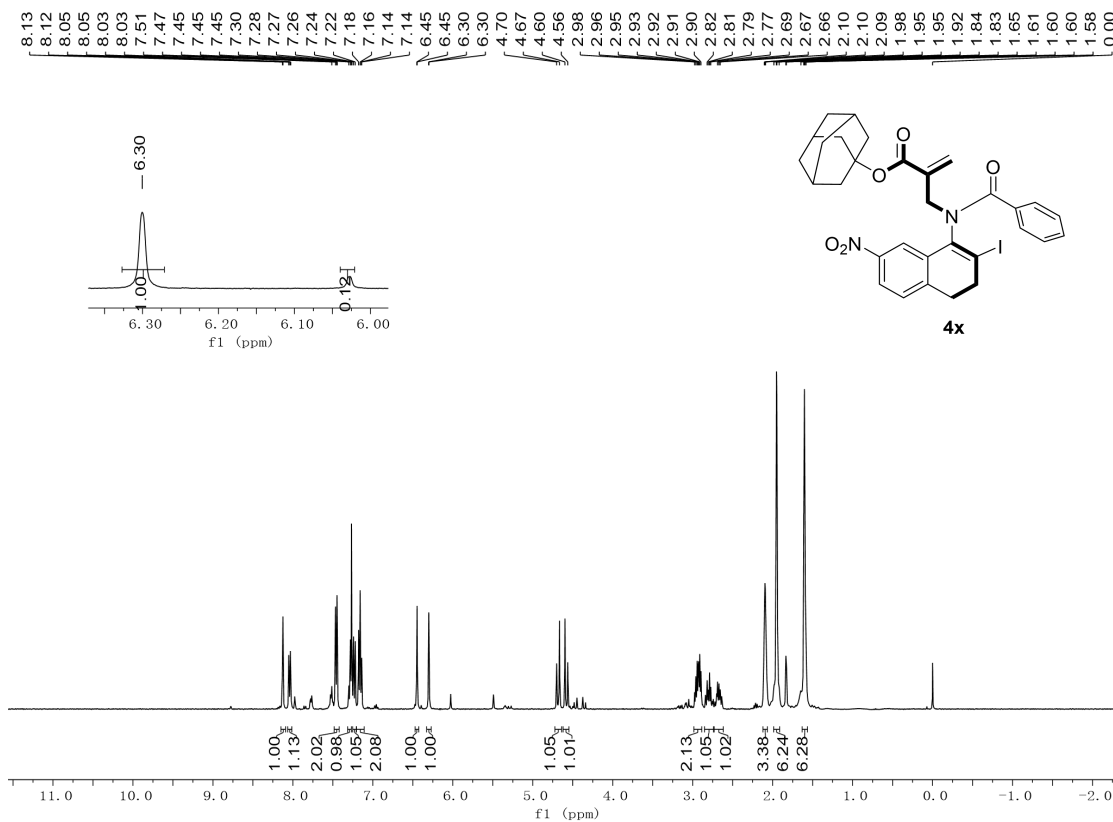

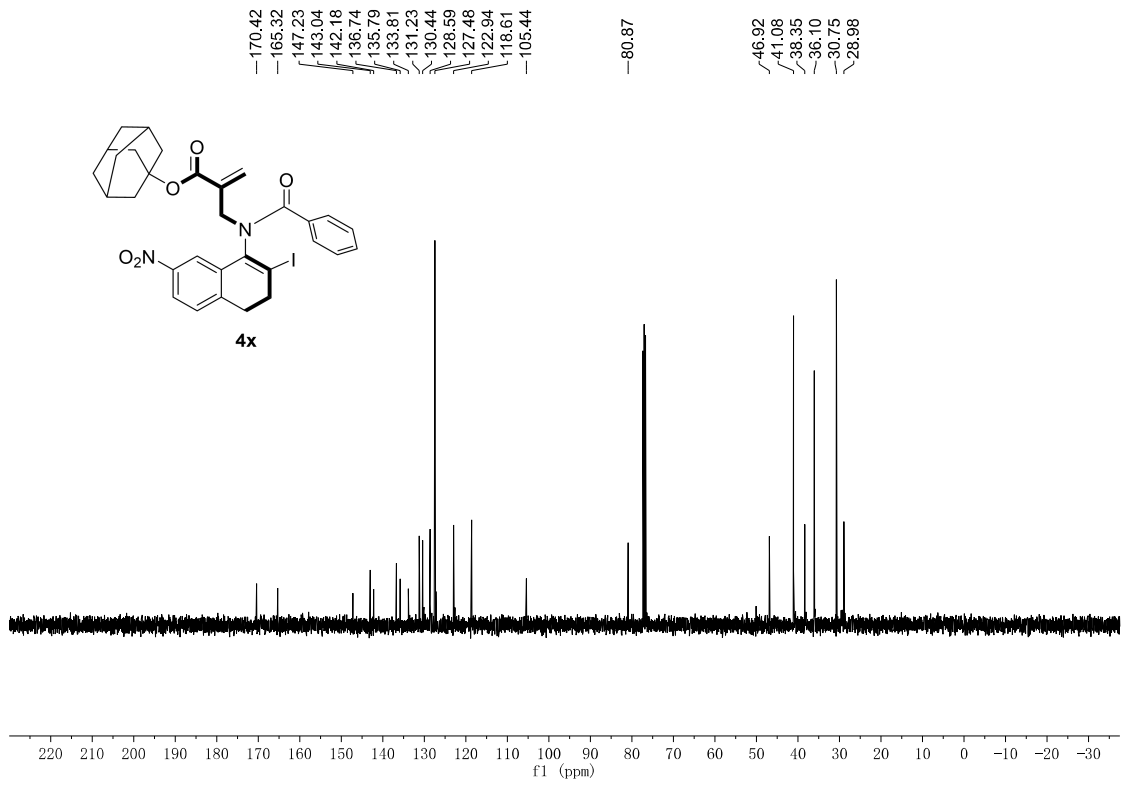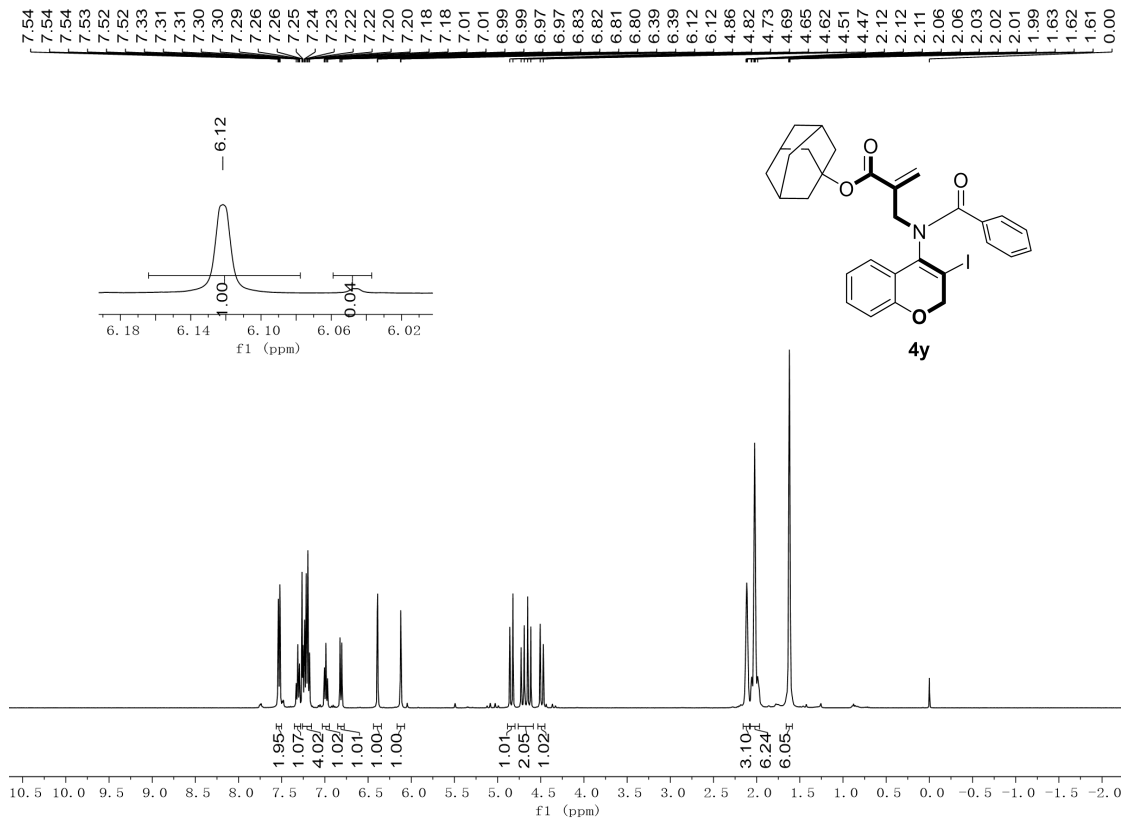



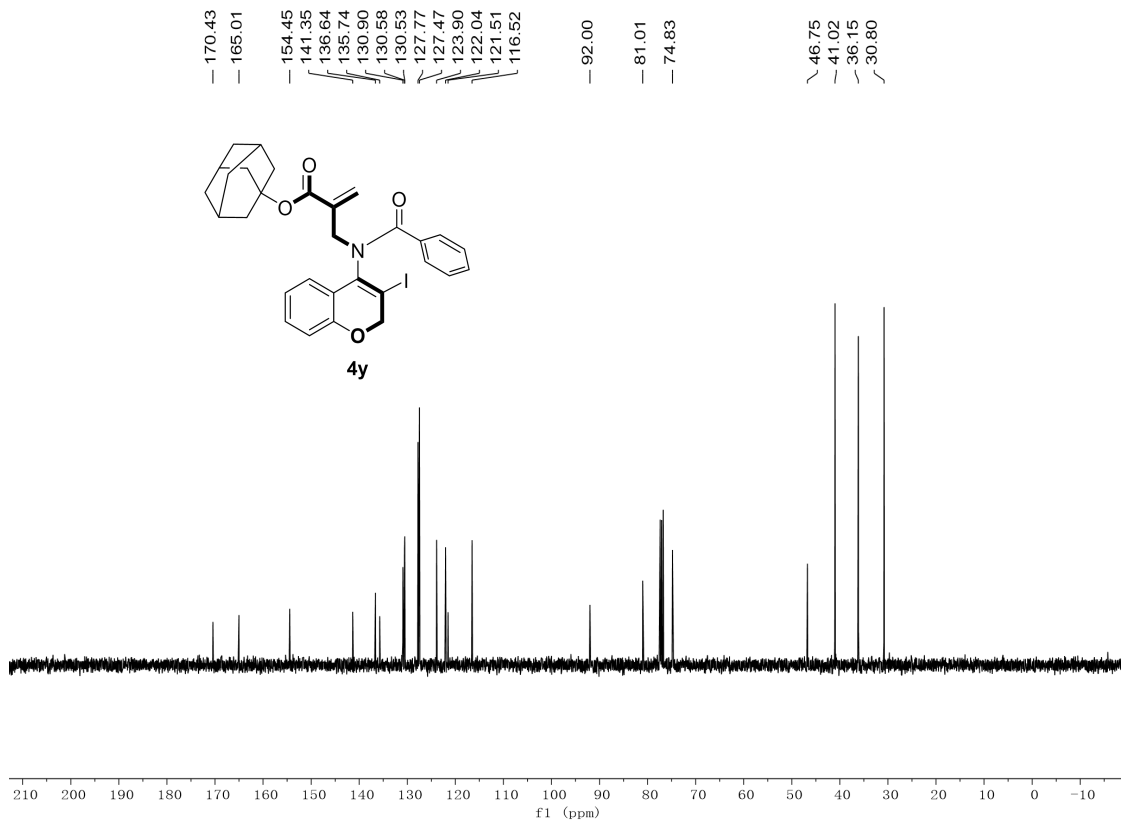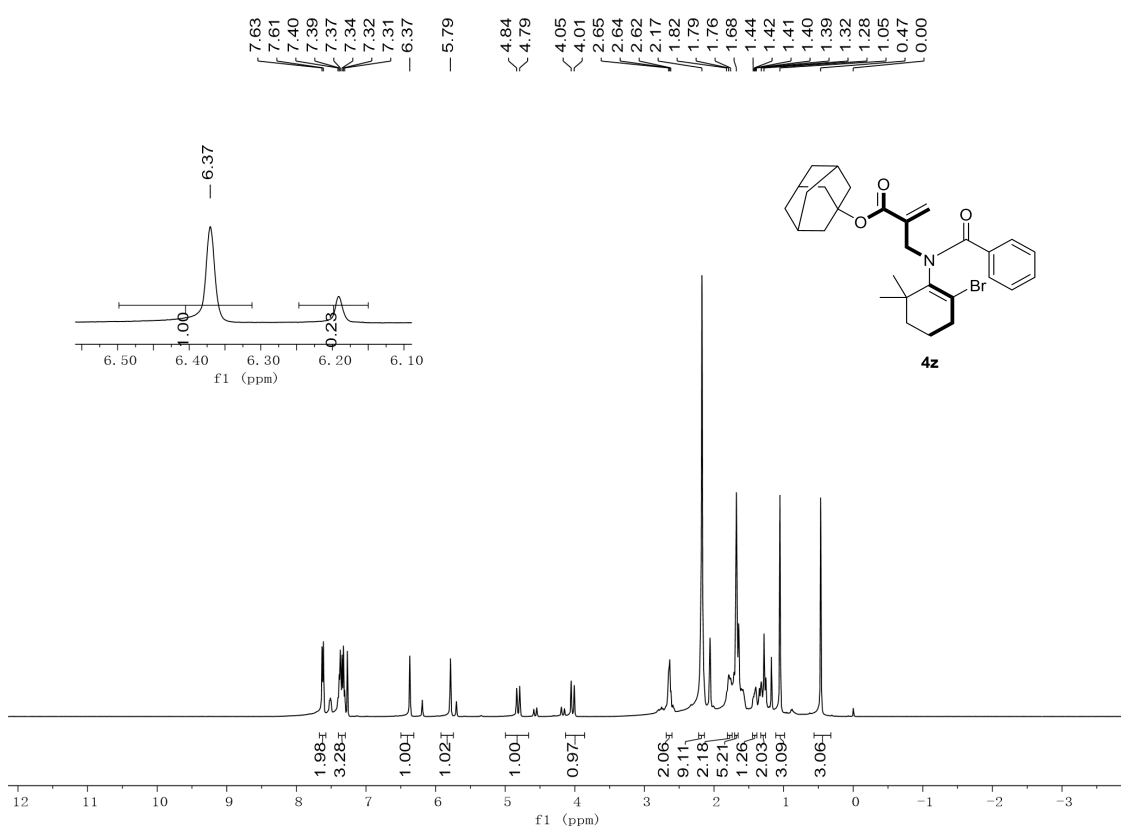

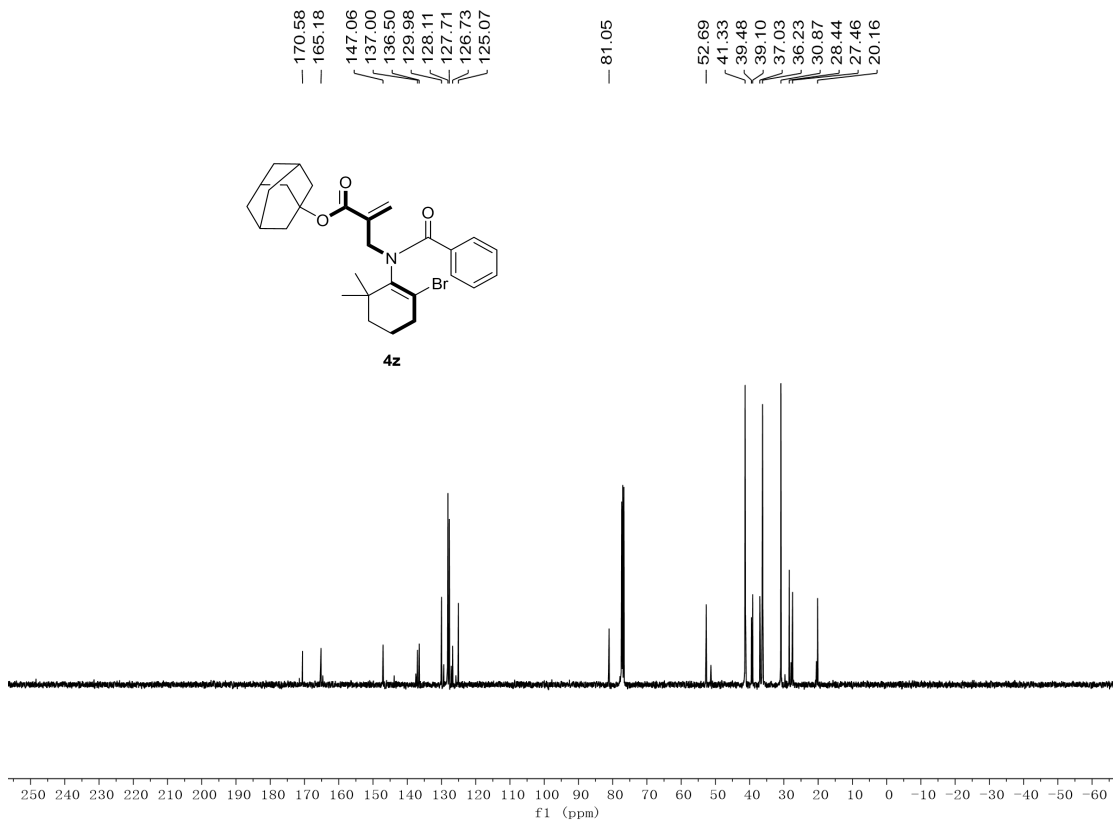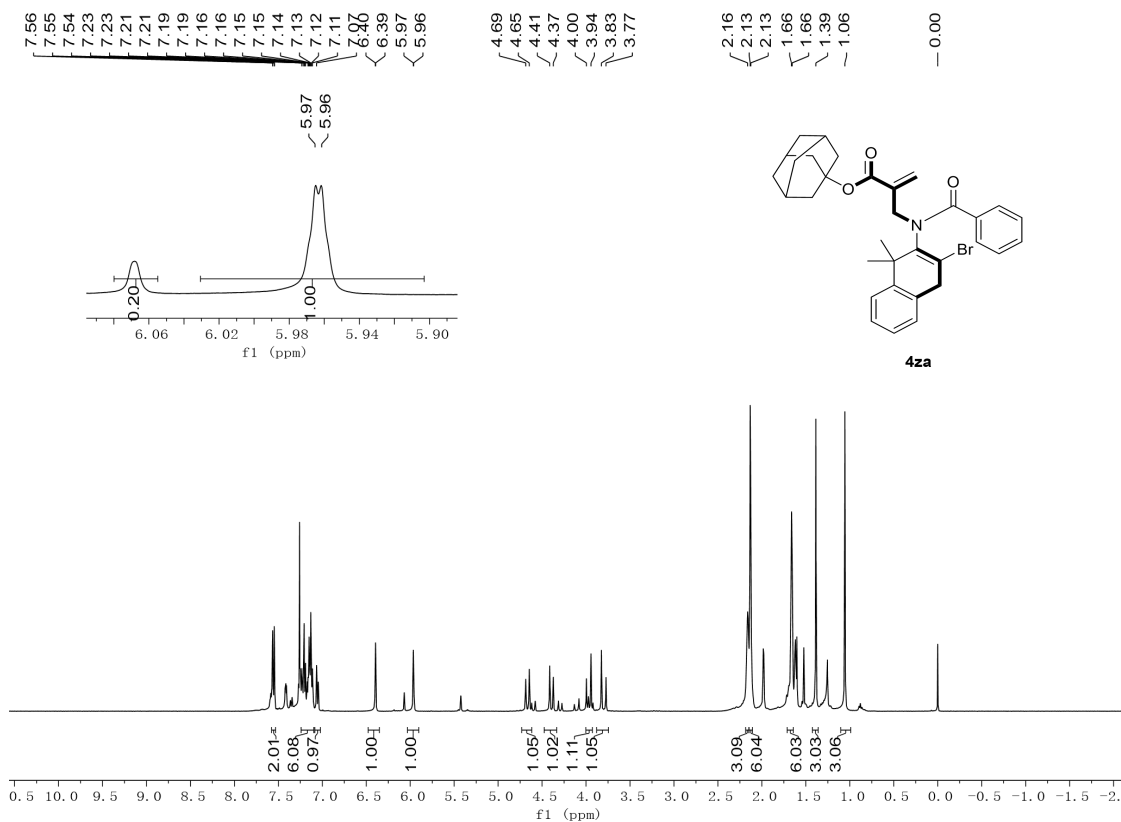

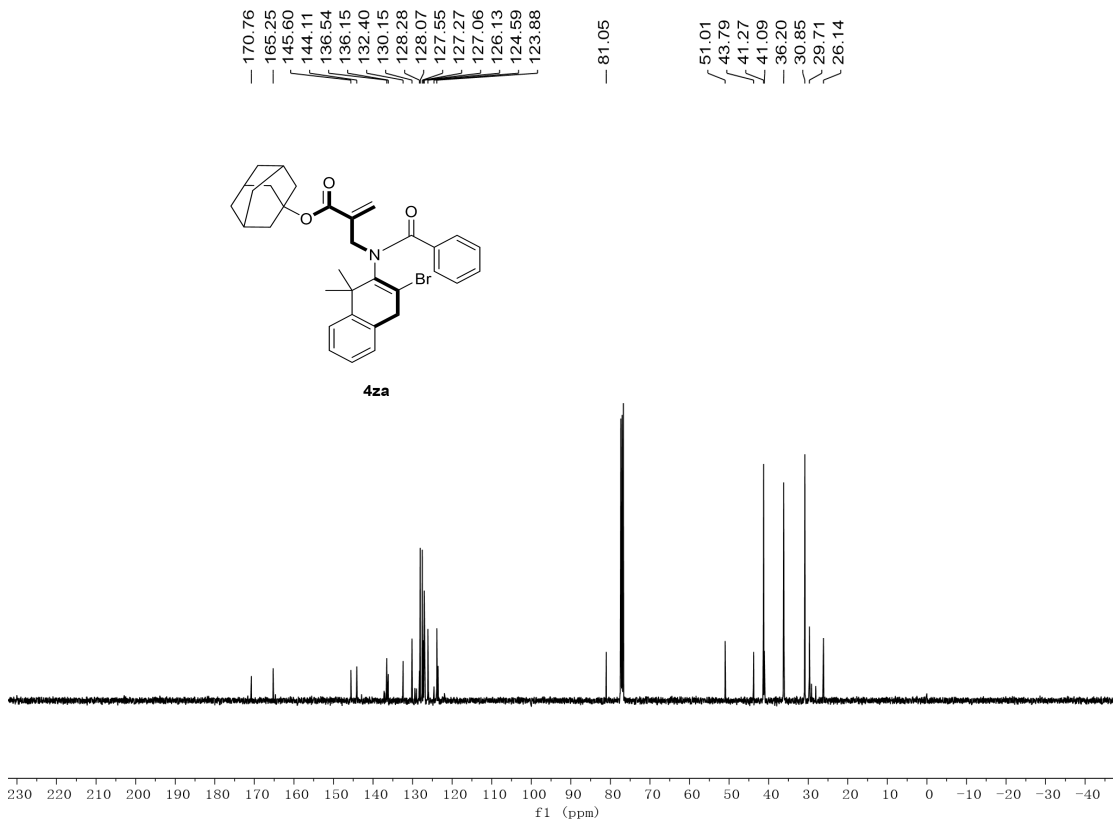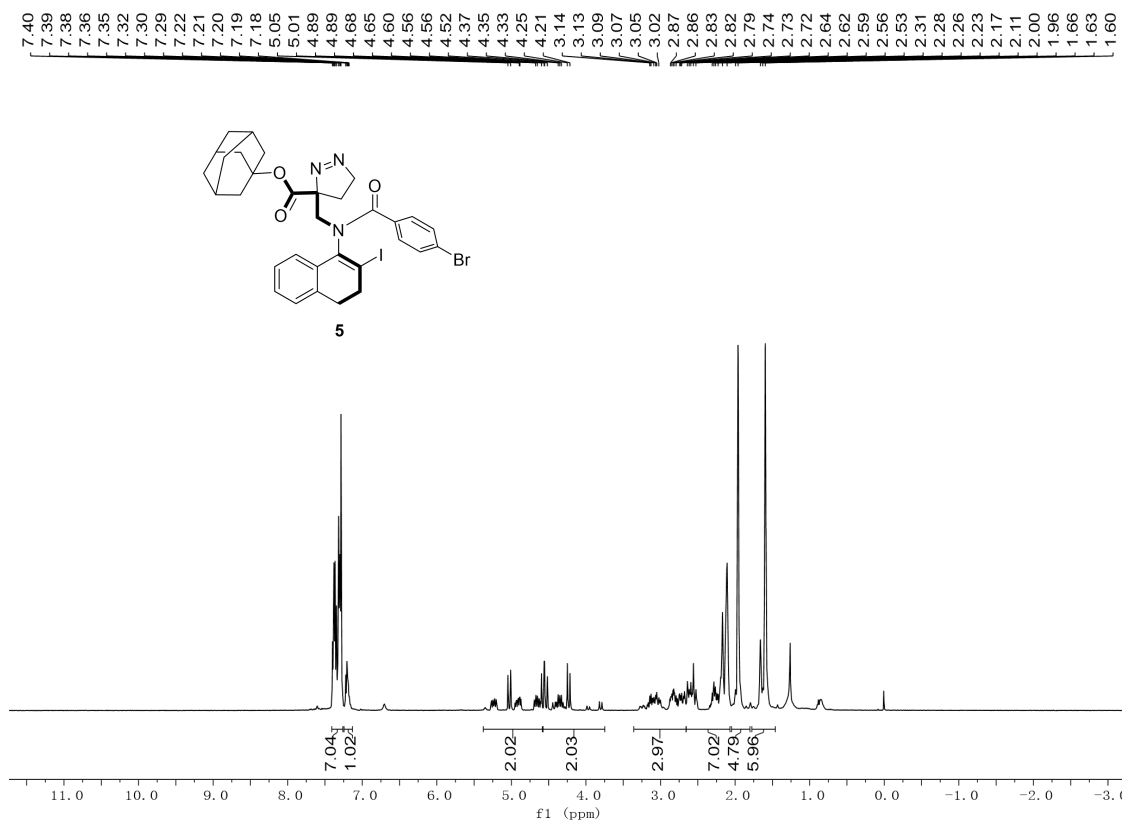

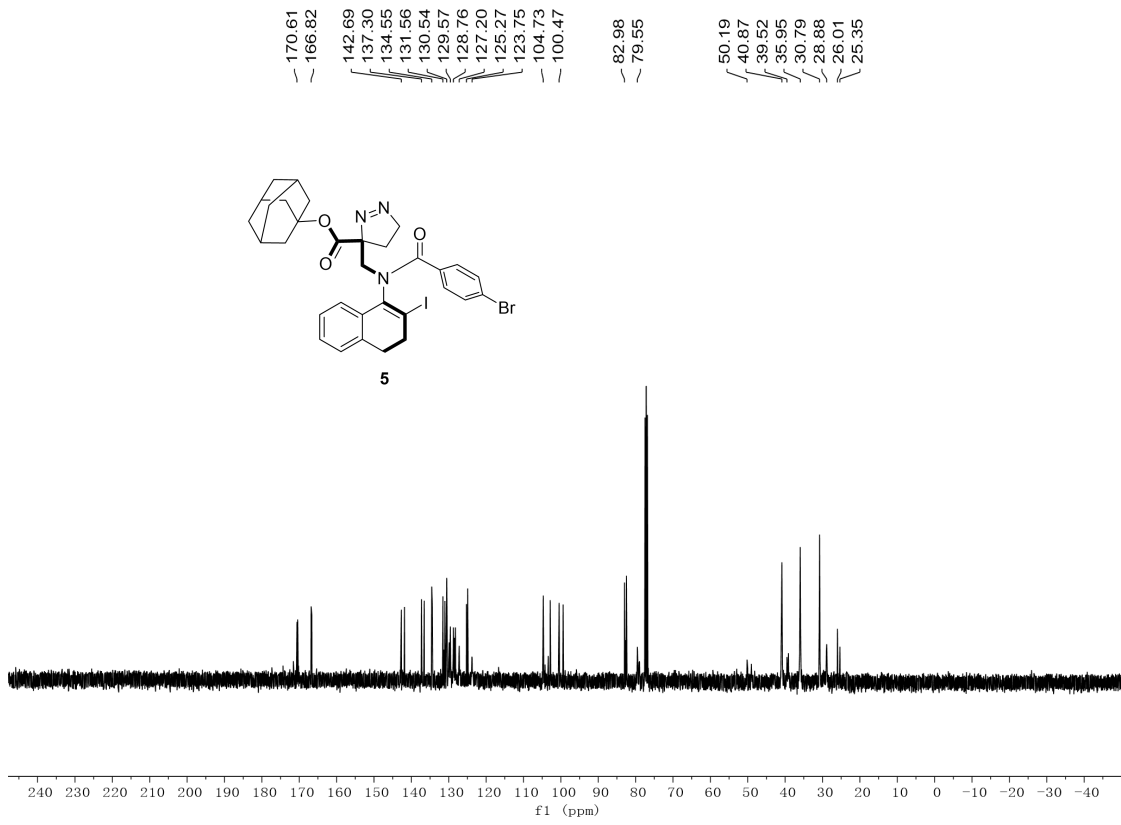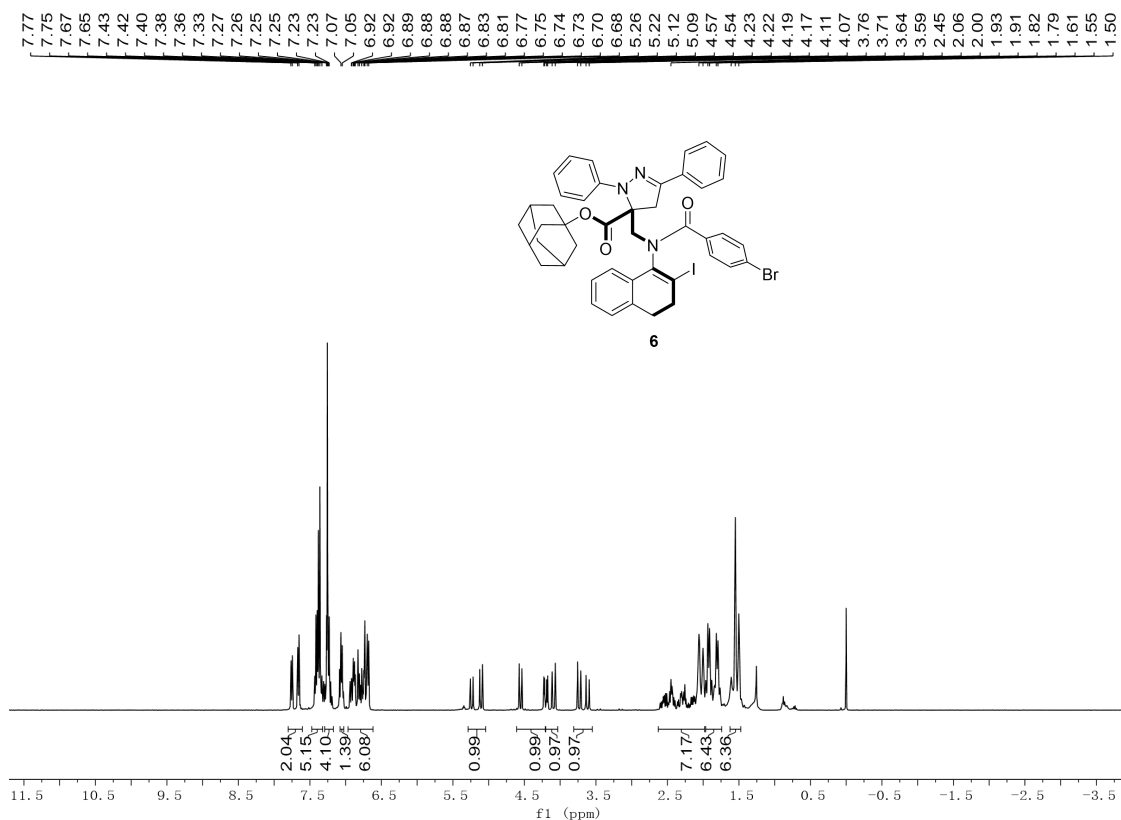

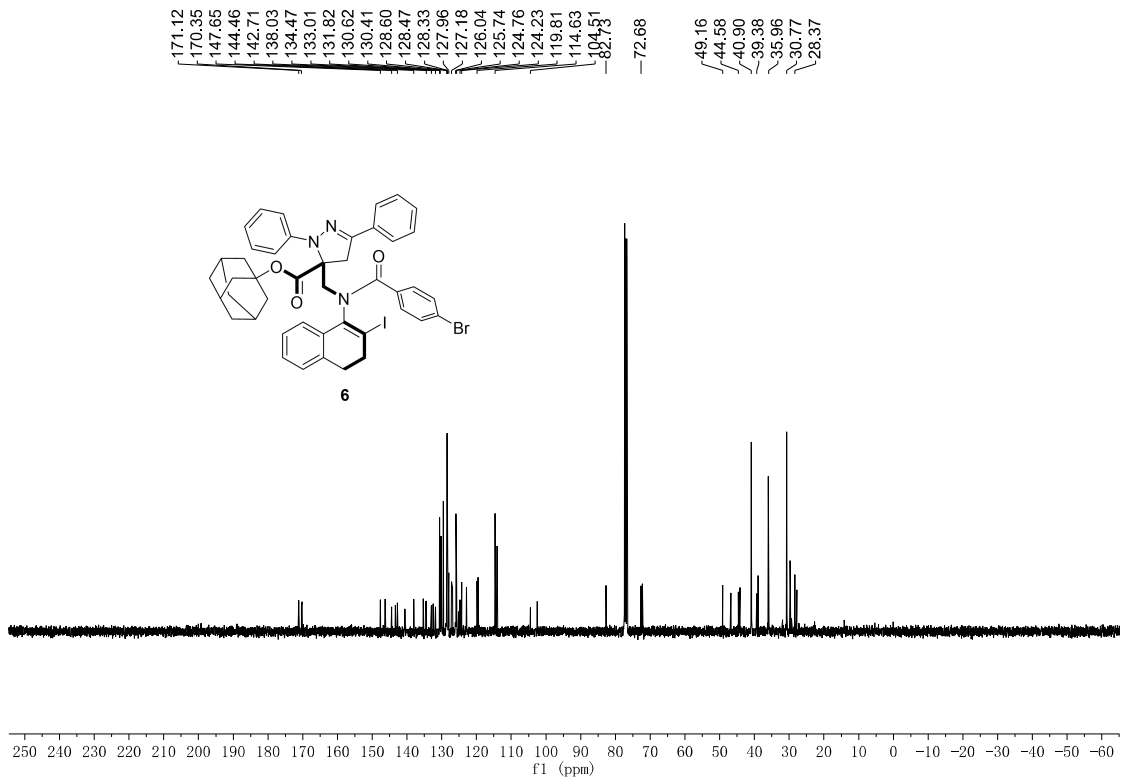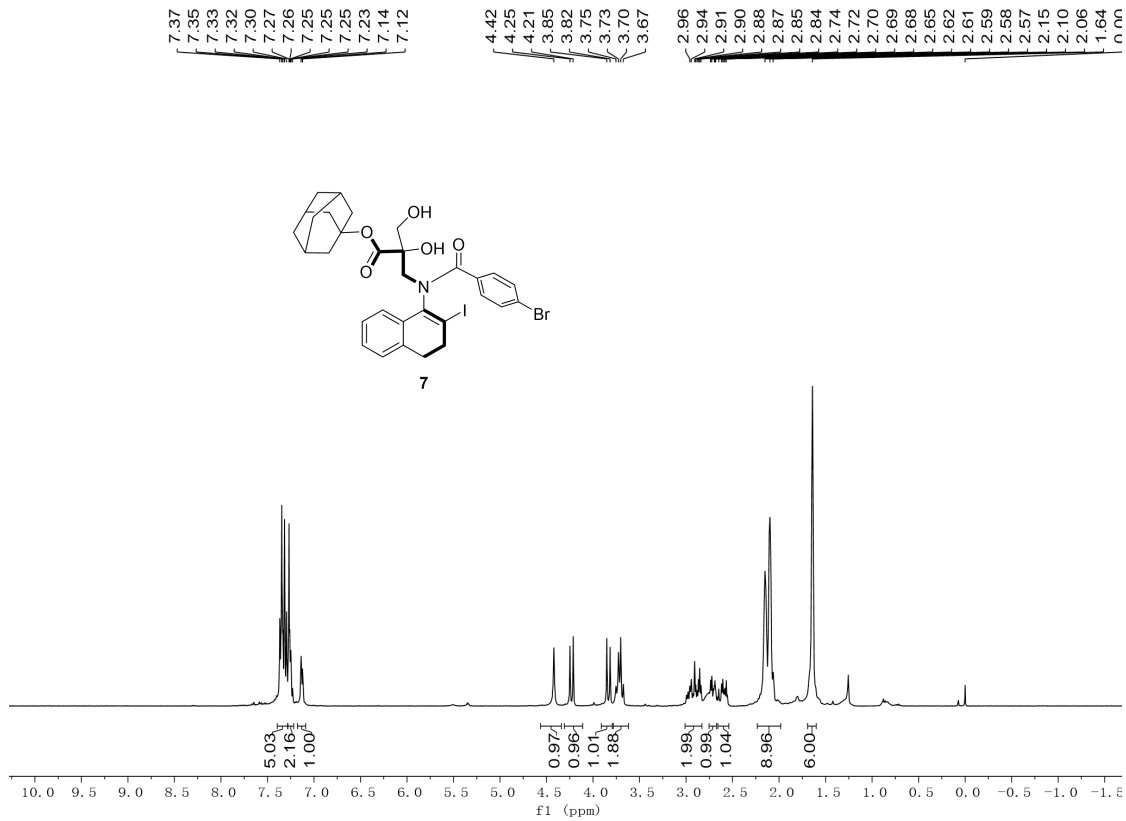

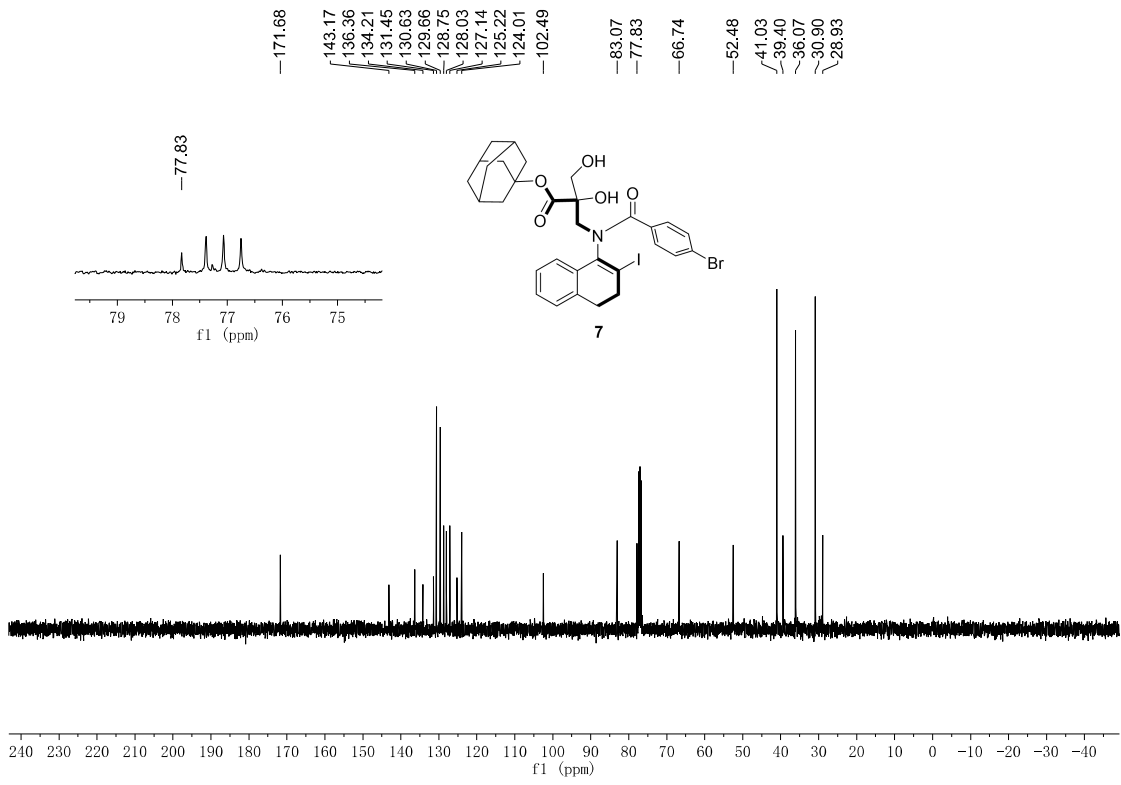

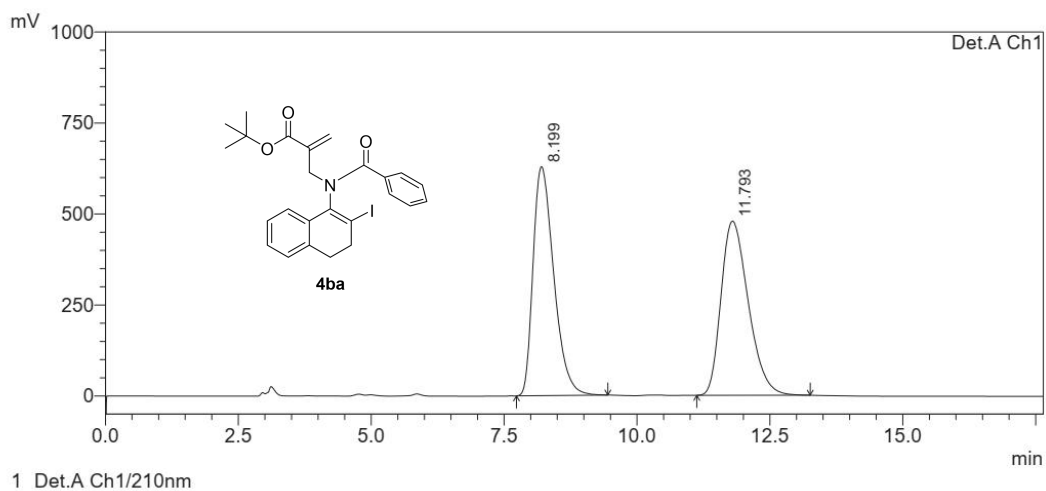

Detector A Ch1 210nm

PeakTable

| Peak# | Ret. Time | Area     | Height  | Area %  | Height % |
|-------|-----------|----------|---------|---------|----------|
| 1     | 8.199     | 17056092 | 629272  | 49.959  | 56.805   |
| 2     | 11.793    | 17084397 | 478501  | 50.041  | 43.195   |
| Total |           | 34140488 | 1107773 | 100.000 | 100.000  |

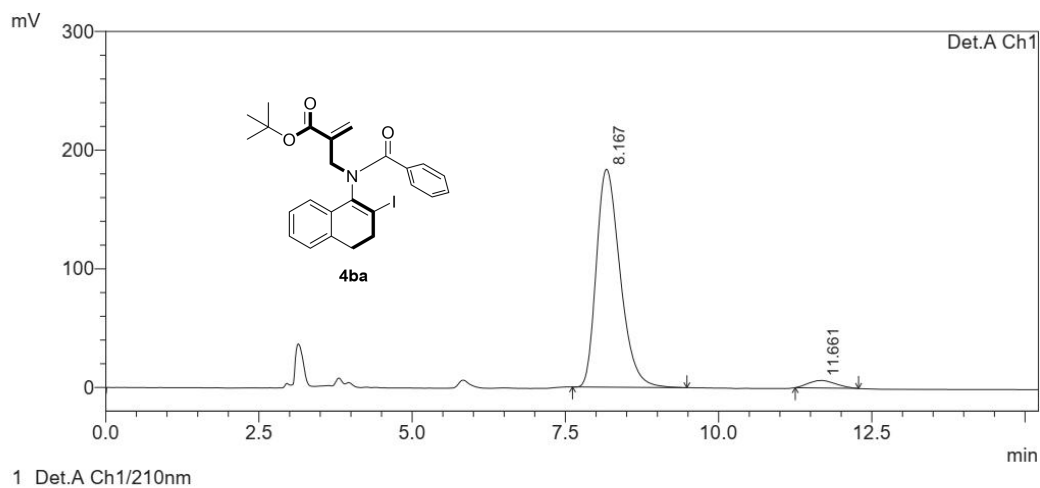

Detector A Ch1 210nm

PeakTable

| Peak# | Ret. Time | Area    | Height | Area %  | Height % |
|-------|-----------|---------|--------|---------|----------|
| 1     | 8.167     | 4956443 | 183443 | 96.142  | 96.642   |
| 2     | 11.661    | 198918  | 6374   | 3.858   | 3.358    |
| Total |           | 5155361 | 189817 | 100.000 | 100.000  |

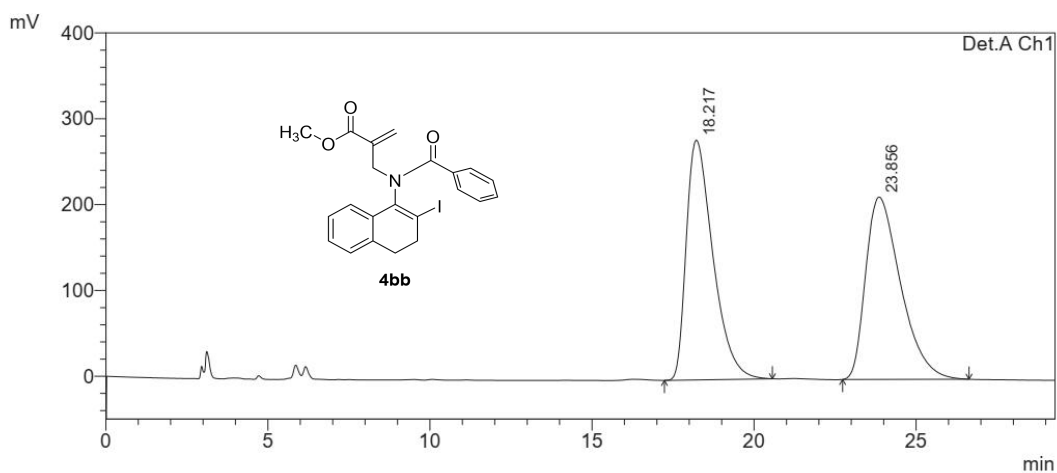

1 Det.A Ch1/210nm

PeakTable

| Peak# | Ret. Time | Area     | Height | Area %  | Height % |
|-------|-----------|----------|--------|---------|----------|
| 1     | 18.217    | 15986895 | 279294 | 50.032  | 56.829   |
| 2     | 23.856    | 15966574 | 212169 | 49.968  | 43.171   |
| Total |           | 31953469 | 491463 | 100.000 | 100.000  |

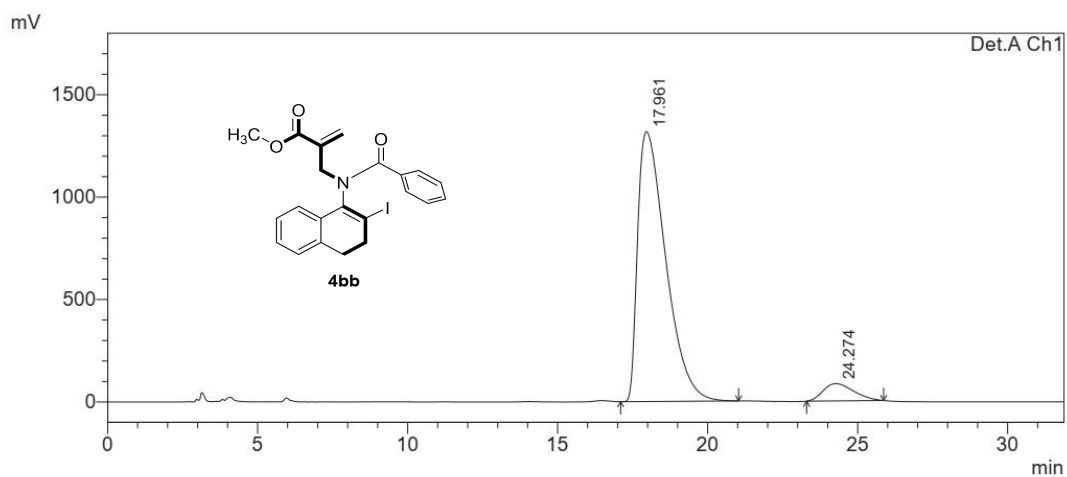

1 Det.A Ch1/210nm

PeakTable

| Peak# | Ret. Time | Area     | Height  | Area %  | Height % |
|-------|-----------|----------|---------|---------|----------|
| 1     | 17.961    | 85801074 | 1317153 | 93.500  | 93.997   |
| 2     | 24.274    | 5965152  | 84116   | 6.500   | 6.003    |
| Total |           | 91766226 | 1401269 | 100.000 | 100.000  |



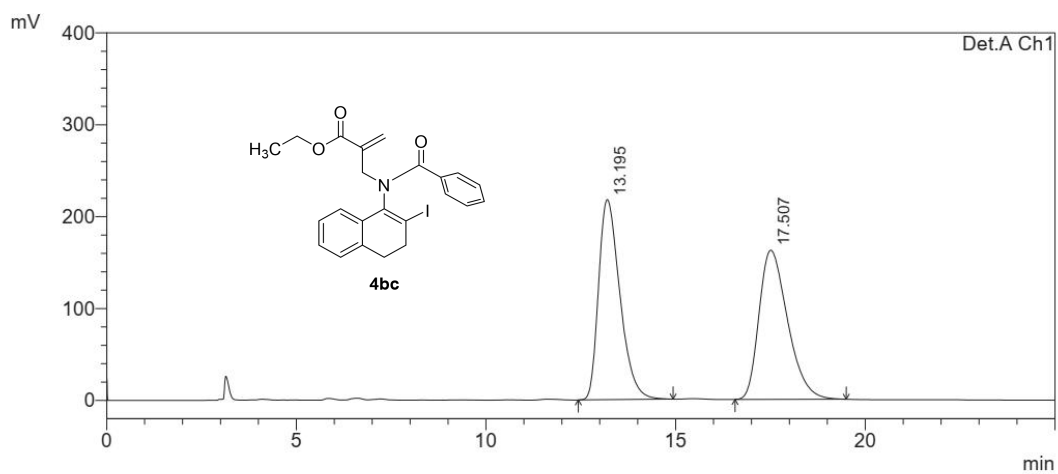

1 Det.A Ch1/210nm

PeakTable

Detector A Ch1 210nm

| Peak# | Ret. Time | Area     | Height | Area %  | Height % |
|-------|-----------|----------|--------|---------|----------|
| 1     | 13.195    | 8511395  | 217435 | 49.995  | 57.267   |
| 2     | 17.507    | 8513038  | 162250 | 50.005  | 42.733   |
| Total |           | 17024433 | 379685 | 100.000 | 100.000  |

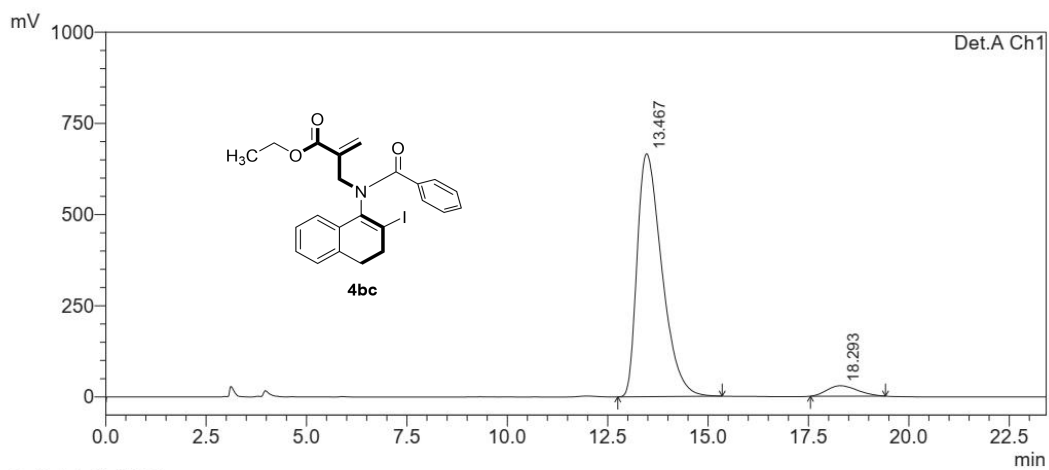

1 Det.A Ch1/210nm

PeakTable

Detector A Ch1 210nm

| Peak# | Ret. Time | Area     | Height | Area %  | Height % |
|-------|-----------|----------|--------|---------|----------|
| 1     | 13.467    | 28535079 | 665701 | 94.983  | 95.875   |
| 2     | 18.293    | 1507106  | 28639  | 5.017   | 4.125    |
| Total |           | 30042185 | 694340 | 100.000 | 100.000  |

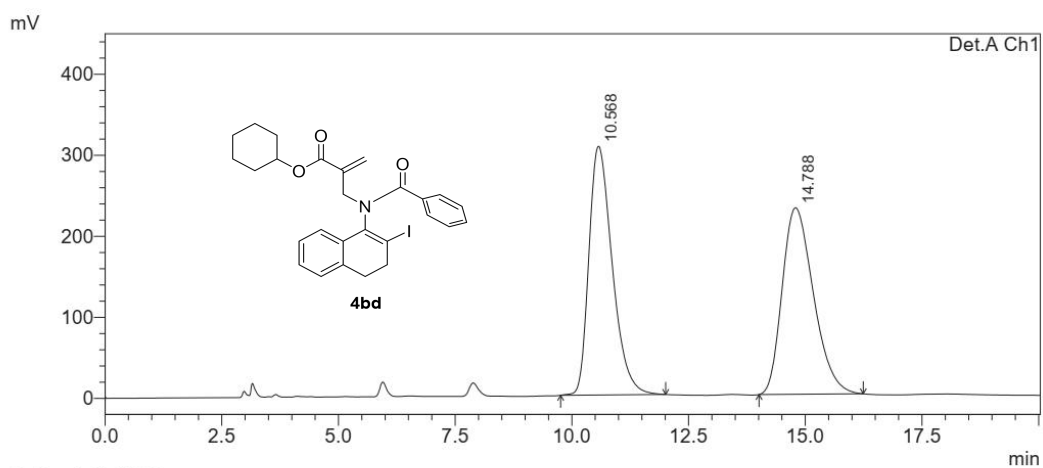

1 Det.A Ch1/210nm

PeakTable

Detector A Ch1 210nm

| Peak# | Ret. Time | Area     | Height | Area %  | Height % |
|-------|-----------|----------|--------|---------|----------|
| 1     | 10.568    | 10672618 | 306536 | 49.857  | 57.111   |
| 2     | 14.788    | 10733885 | 230205 | 50.143  | 42.889   |
| Total |           | 21406503 | 536741 | 100.000 | 100.000  |

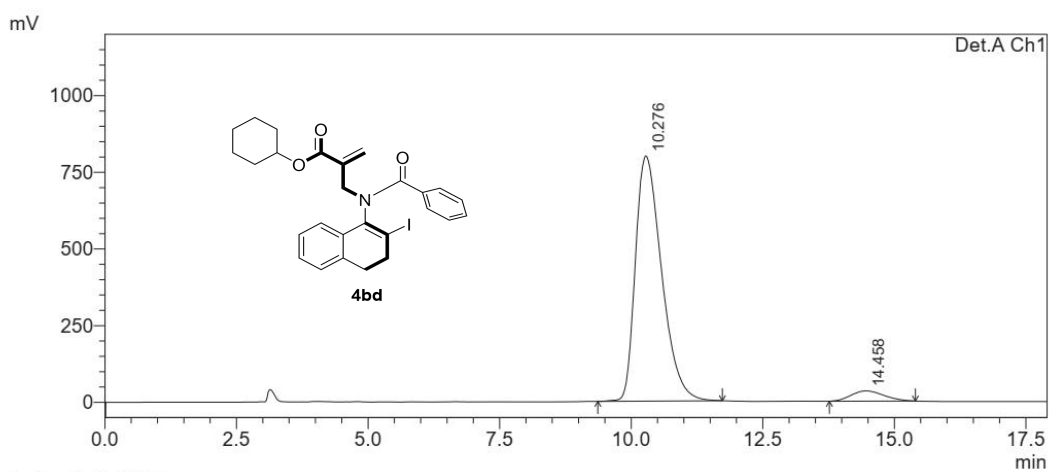

1 Det.A Ch1/210nm

PeakTable

Detector A Ch1 210nm

| Peak# | Ret. Time | Area     | Height | Area %  | Height % |
|-------|-----------|----------|--------|---------|----------|
| 1     | 10.276    | 27735761 | 798295 | 95.017  | 95.972   |
| 2     | 14.458    | 1454663  | 33505  | 4.983   | 4.028    |
| Total |           | 29190424 | 831800 | 100.000 | 100.000  |

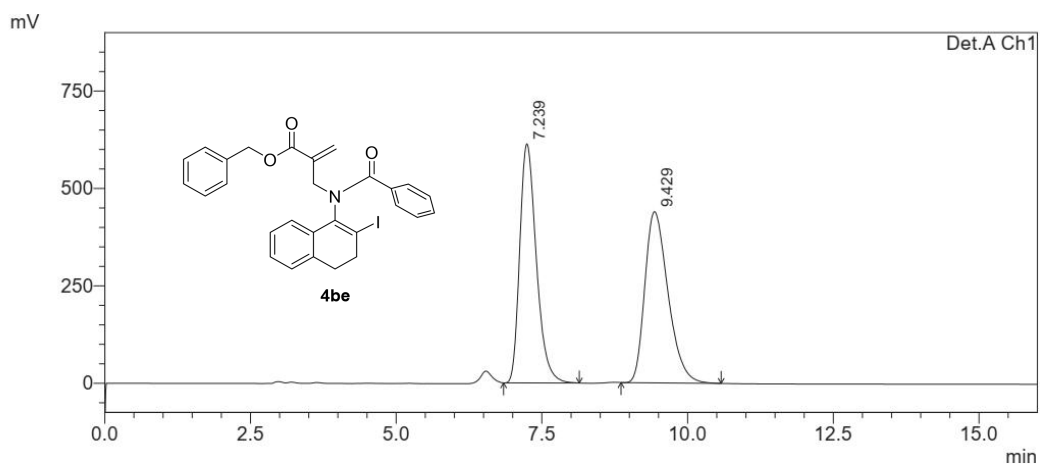

1 Det.A Ch1/210nm

PeakTable

Detector A Ch1 210nm

| Peak# | Ret. Time | Area     | Height  | Area %  | Height % |
|-------|-----------|----------|---------|---------|----------|
| 1     | 7.239     | 12157855 | 612969  | 49.961  | 58.262   |
| 2     | 9.429     | 12176814 | 439117  | 50.039  | 41.738   |
| Total |           | 24334668 | 1052086 | 100.000 | 100.000  |

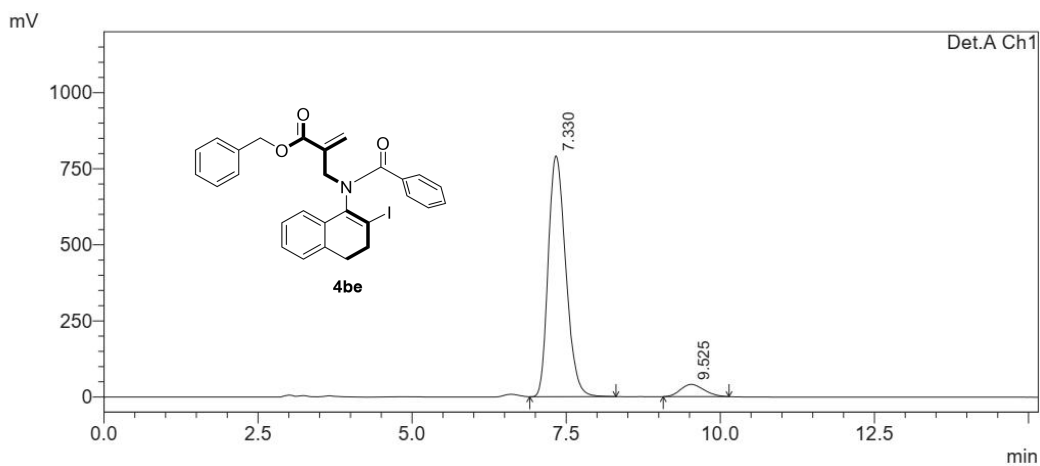

1 Det.A Ch1/210nm

PeakTable

Detector A Ch1 210nm

| Peak# | Ret. Time | Area     | Height | Area %  | Height % |
|-------|-----------|----------|--------|---------|----------|
| 1     | 7.330     | 15659589 | 790757 | 93.630  | 95.157   |
| 2     | 9.525     | 1065320  | 40244  | 6.370   | 4.843    |
| Total |           | 16724909 | 831000 | 100.000 | 100.000  |

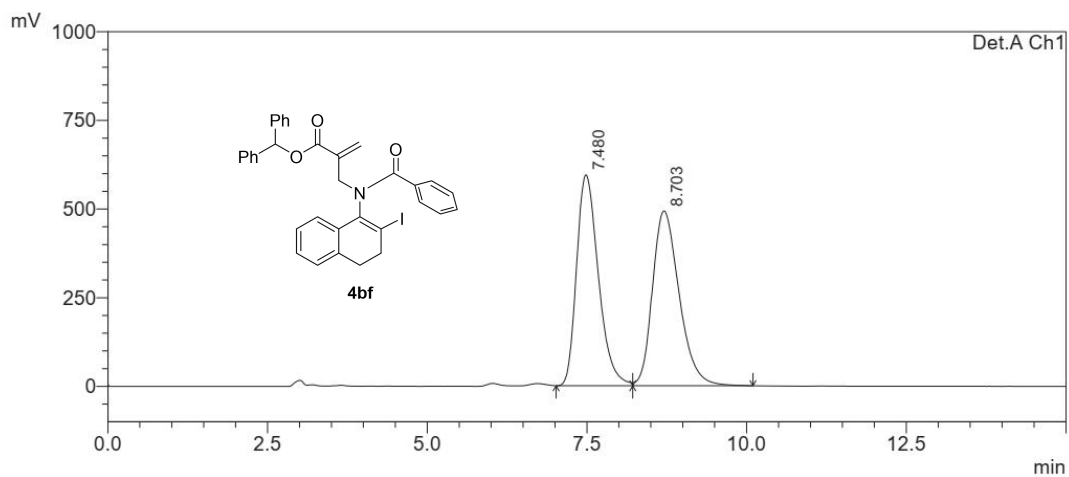

1 Det.A Ch1/210nm

PeakTable

| Peak# | Ret. Time | Area     | Height  | Area %  | Height % |
|-------|-----------|----------|---------|---------|----------|
| 1     | 7.480     | 14115664 | 594168  | 49.652  | 54.687   |
| 2     | 8.703     | 14313406 | 492330  | 50.348  | 45.313   |
| Total |           | 28429070 | 1086498 | 100.000 | 100.000  |

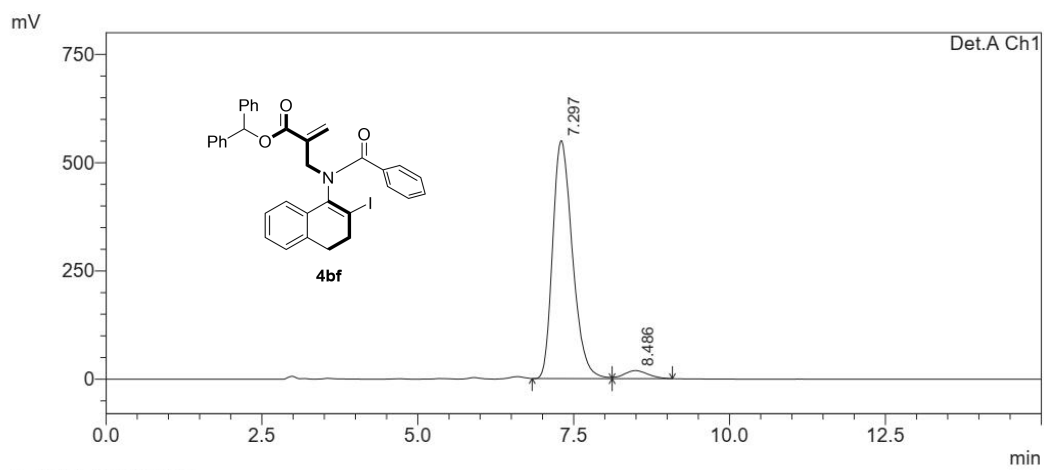

1 Det.A Ch1/210nm

PeakTable

| Peak# | Ret. Time | Area     | Height | Area %  | Height % |
|-------|-----------|----------|--------|---------|----------|
| 1     | 7.297     | 12108129 | 549116 | 96.084  | 96.734   |
| 2     | 8.486     | 493522   | 18542  | 3.916   | 3.266    |
| Total |           | 12601651 | 567659 | 100.000 | 100.000  |

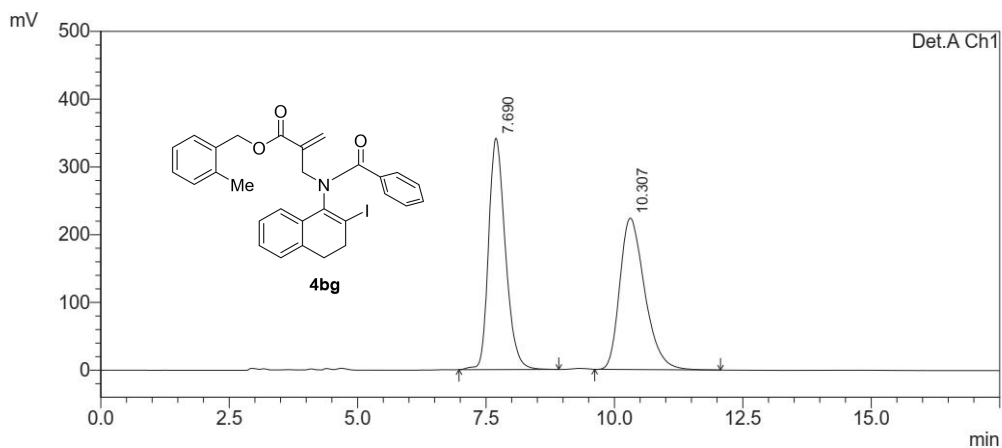

1 Det.A Ch1/210nm

PeakTable

Detector A Ch1 210nm

| Peak# | Ret. Time | Area     | Height | Area %  | Height % |
|-------|-----------|----------|--------|---------|----------|
| 1     | 7.690     | 7767541  | 341350 | 50.686  | 60.491   |
| 2     | 10.307    | 7557418  | 222950 | 49.314  | 39.509   |
| Total |           | 15324960 | 564300 | 100.000 | 100.000  |

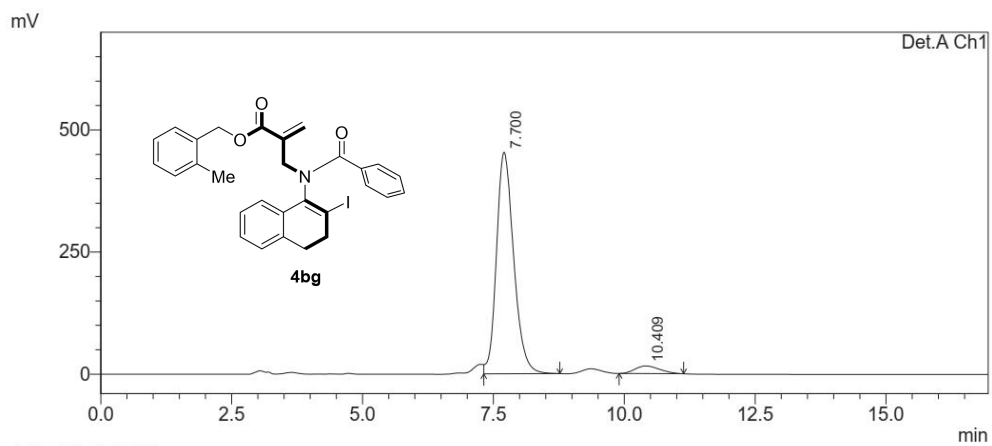

1 Det.A Ch1/210nm

PeakTable

Detector A Ch1 210nm

| Peak# | Ret. Time | Area     | Height | Area %  | Height % |
|-------|-----------|----------|--------|---------|----------|
| 1     | 7.700     | 10382441 | 449816 | 95.289  | 96.629   |
| 2     | 10.409    | 513291   | 15694  | 4.711   | 3.371    |
| Total |           | 10895731 | 465510 | 100.000 | 100.000  |

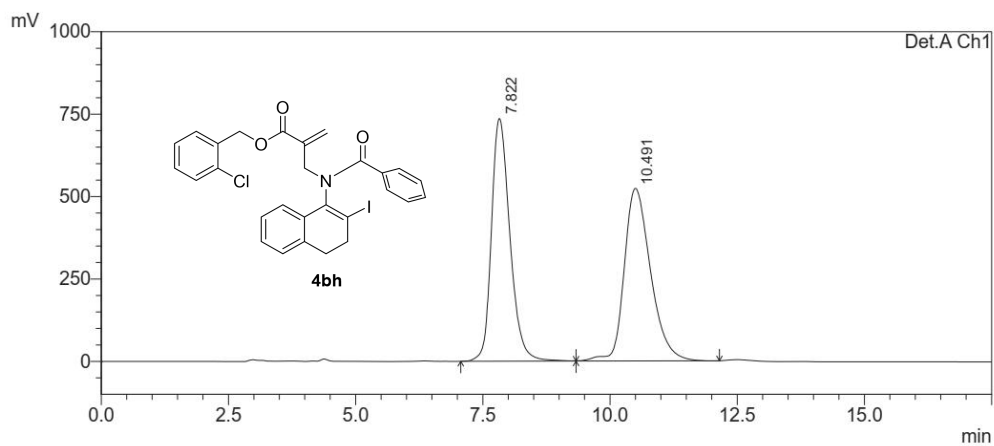

1 Det.A Ch1/210nm

PeakTable

Detector A Ch1 210nm

| Peak# | Ret. Time | Area     | Height  | Area %  | Height % |
|-------|-----------|----------|---------|---------|----------|
| 1     | 7.822     | 18607251 | 736096  | 49.593  | 58.452   |
| 2     | 10.491    | 18912343 | 523230  | 50.407  | 41.548   |
| Total |           | 37519594 | 1259326 | 100.000 | 100.000  |

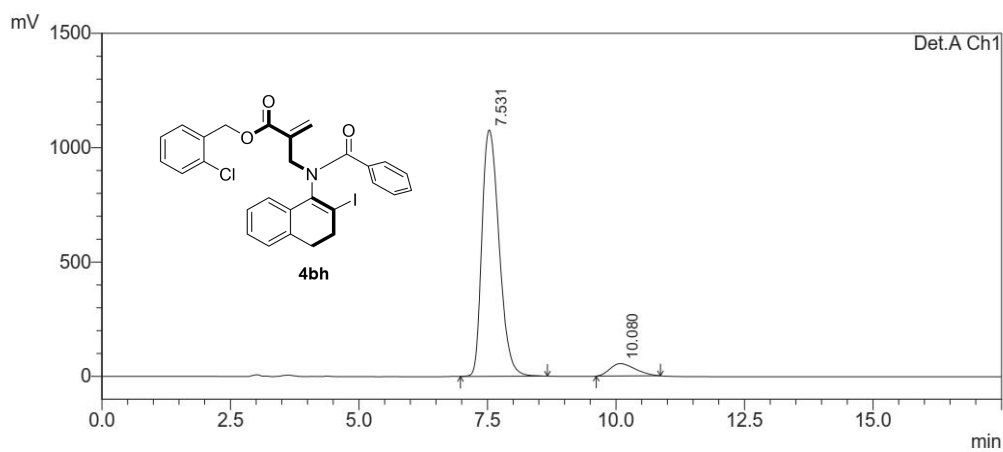

1 Det.A Ch1/210nm

PeakTable

Detector A Ch1 210nm

| Peak# | Ret. Time | Area     | Height  | Area %  | Height % |
|-------|-----------|----------|---------|---------|----------|
| 1     | 7.531     | 25022812 | 1076487 | 93.124  | 95.216   |
| 2     | 10.080    | 1847593  | 54087   | 6.876   | 4.784    |
| Total |           | 26870404 | 1130574 | 100.000 | 100.000  |

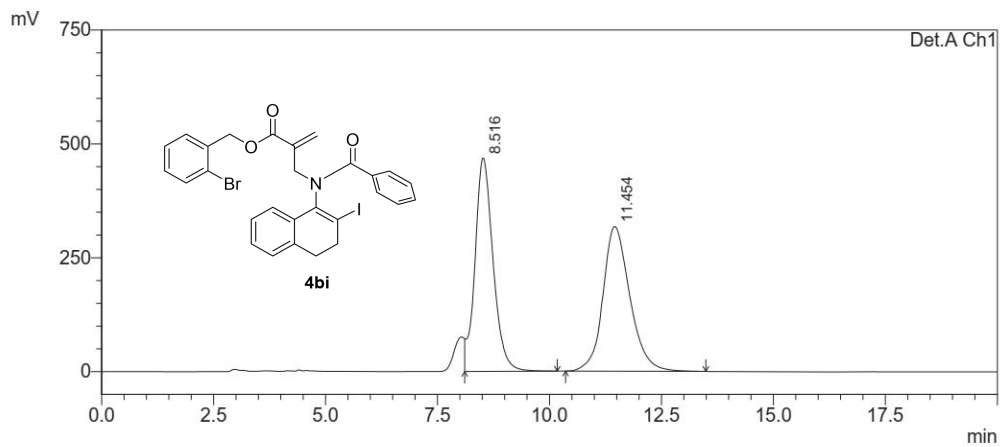

1 Det.A Ch1/210nm

PeakTable

Detector A Ch1 210nm

| Peak# | Ret. Time | Area     | Height | Area %  | Height % |
|-------|-----------|----------|--------|---------|----------|
| 1     | 8.516     | 13128361 | 468635 | 49.672  | 59.648   |
| 2     | 11.454    | 13301899 | 317028 | 50.328  | 40.352   |
| Total |           | 26430261 | 785663 | 100.000 | 100.000  |

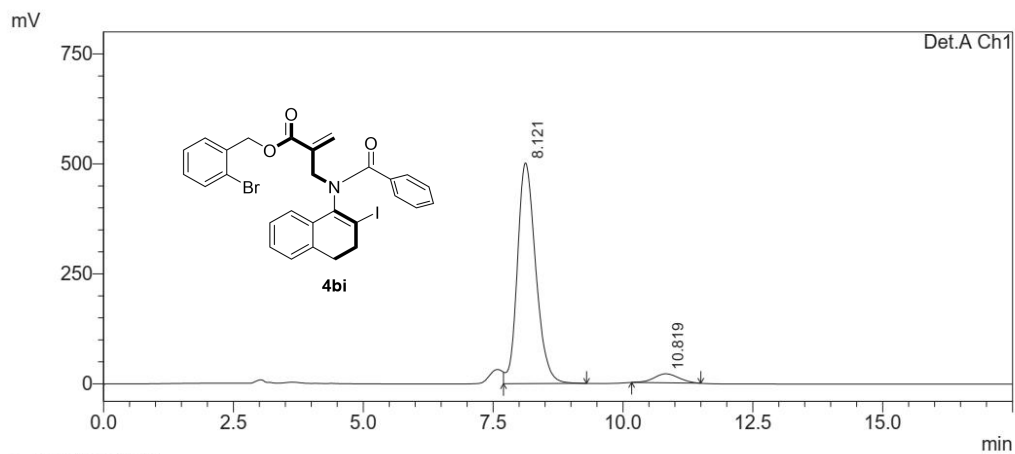

1 Det.A Ch1/210nm

PeakTable

Detector A Ch1 210nm

| Peak# | Ret. Time | Area     | Height | Area %  | Height % |
|-------|-----------|----------|--------|---------|----------|
| 1     | 8.121     | 12325105 | 500871 | 94.790  | 96.082   |
| 2     | 10.819    | 677443   | 20426  | 5.210   | 3.918    |
| Total |           | 13002548 | 521296 | 100.000 | 100.000  |

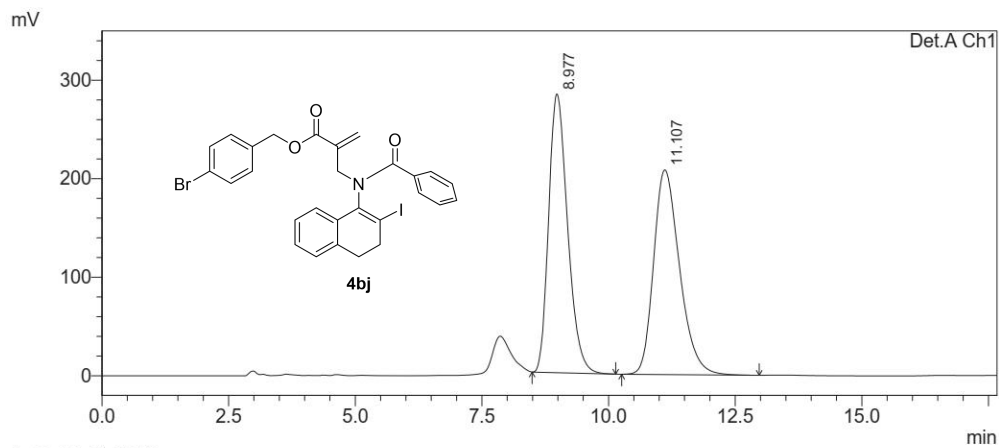

1 Det.A Ch1/210nm

PeakTable

Detector A Ch1 210nm

| Peak# | Ret. Time | Area     | Height | Area %  | Height % |
|-------|-----------|----------|--------|---------|----------|
| 1     | 8.977     | 7371013  | 282711 | 49.938  | 57.715   |
| 2     | 11.107    | 7389306  | 207127 | 50.062  | 42.285   |
| Total |           | 14760320 | 489838 | 100.000 | 100.000  |

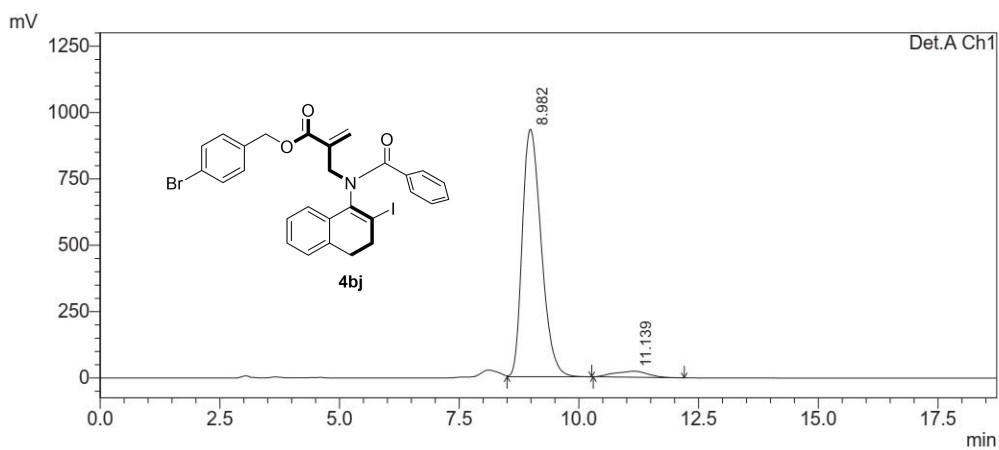

1 Det.A Ch1/210nm

PeakTable

Detector A Ch1 210nm

| Peak# | Ret. Time | Area     | Height | Area %  | Height % |
|-------|-----------|----------|--------|---------|----------|
| 1     | 8.982     | 25699644 | 931808 | 95.947  | 97.636   |
| 2     | 11.139    | 1085674  | 22558  | 4.053   | 2.364    |
| Total |           | 26785318 | 954366 | 100.000 | 100.000  |



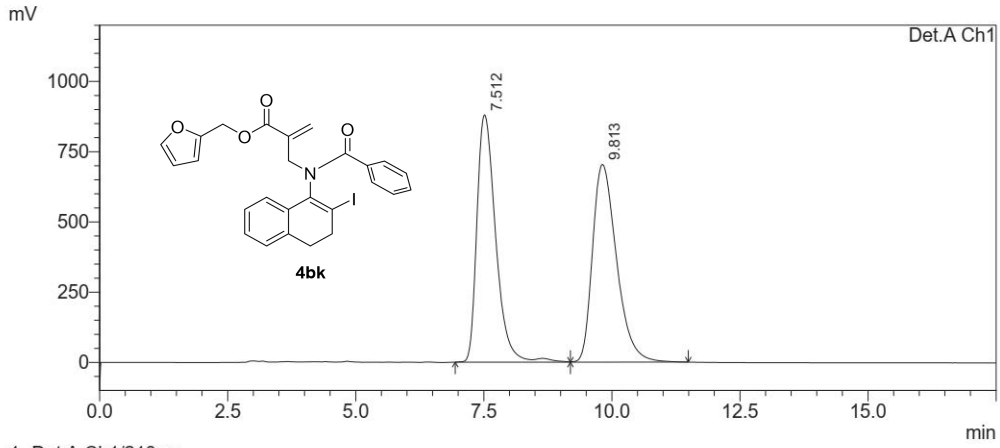

1 Det.A Ch1/210nm

PeakTable

Detector A Ch1 210nm

| Peak# | Ret. Time | Area     | Height  | Area %  | Height % |
|-------|-----------|----------|---------|---------|----------|
| 1     | 7.512     | 22480977 | 878244  | 49.483  | 55.552   |
| 2     | 9.813     | 22951087 | 702689  | 50.517  | 44.448   |
| Total |           | 45432064 | 1580933 | 100.000 | 100.000  |

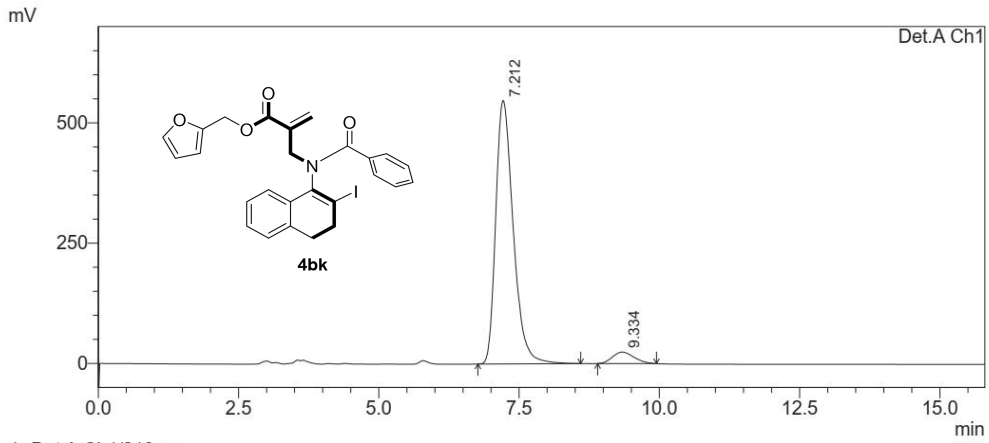

1 Det.A Ch1/210nm

PeakTable

Detector A Ch1 210nm

| Peak# | Ret. Time | Area     | Height | Area %  | Height % |
|-------|-----------|----------|--------|---------|----------|
| 1     | 7.212     | 11851807 | 547024 | 94.919  | 95.829   |
| 2     | 9.334     | 634369   | 23808  | 5.081   | 4.171    |
| Total |           | 12486176 | 570832 | 100.000 | 100.000  |

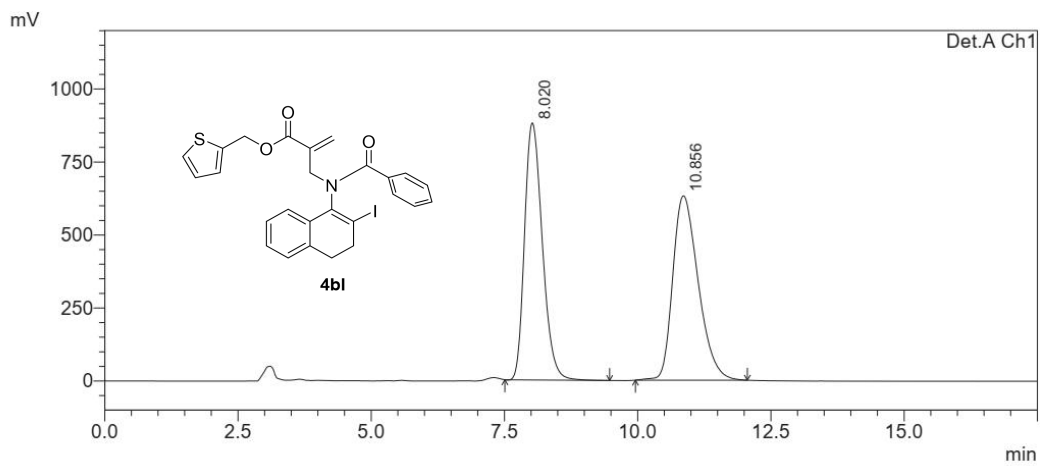

1 Det.A Ch1/210nm

PeakTable

Detector A Ch1 210nm

| Peak# | Ret. Time | Area     | Height  | Area %  | Height % |
|-------|-----------|----------|---------|---------|----------|
| 1     | 8.020     | 20442078 | 879980  | 49.316  | 58.292   |
| 2     | 10.856    | 21008827 | 629623  | 50.684  | 41.708   |
| Total |           | 41450905 | 1509602 | 100.000 | 100.000  |

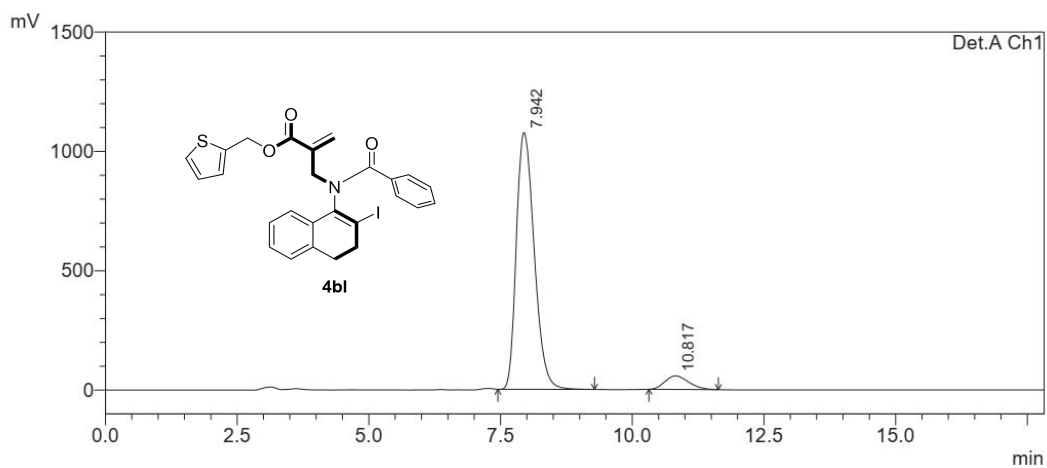

1 Det.A Ch1/210nm

PeakTable

Detector A Ch1 210nm

| Peak# | Ret. Time | Area     | Height  | Area %  | Height % |
|-------|-----------|----------|---------|---------|----------|
| 1     | 7.942     | 25450563 | 1075426 | 93.440  | 94.968   |
| 2     | 10.817    | 1786810  | 56979   | 6.560   | 5.032    |
| Total |           | 27237372 | 1132405 | 100.000 | 100.000  |

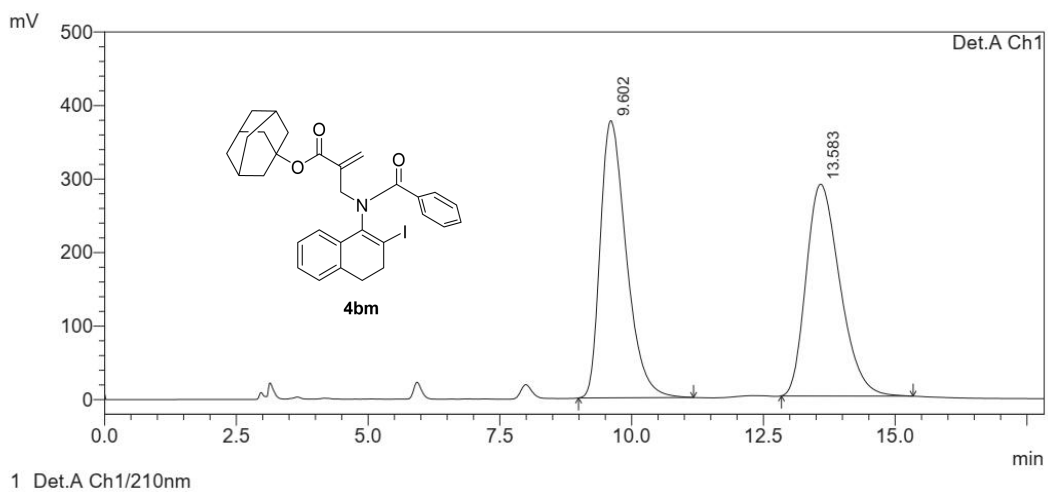

1 Det.A Ch1/210nm

PeakTable

Detector A Ch1 210nm

| Peak# | Ret. Time | Area     | Height | Area %  | Height % |
|-------|-----------|----------|--------|---------|----------|
| 1     | 9.602     | 12960426 | 376236 | 50.199  | 56.660   |
| 2     | 13.583    | 12857760 | 287786 | 49.801  | 43.340   |
| Total |           | 25818186 | 664022 | 100.000 | 100.000  |

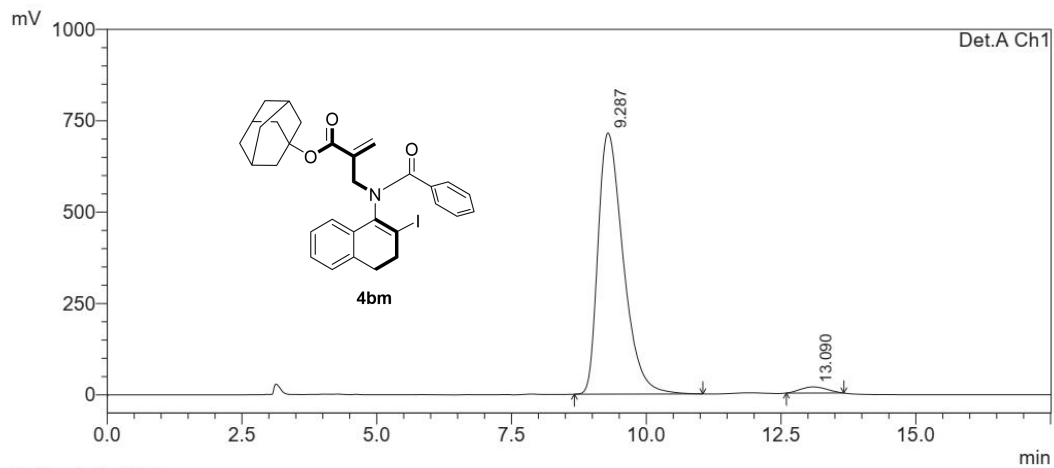

1 Det.A Ch1/210nm

PeakTable

Detector A Ch1 210nm

| Peak# | Ret. Time | Area     | Height | Area %  | Height % |
|-------|-----------|----------|--------|---------|----------|
| 1     | 9.287     | 23273920 | 714327 | 97.593  | 97.702   |
| 2     | 13.090    | 574075   | 16799  | 2.407   | 2.298    |
| Total |           | 23847995 | 731126 | 100.000 | 100.000  |

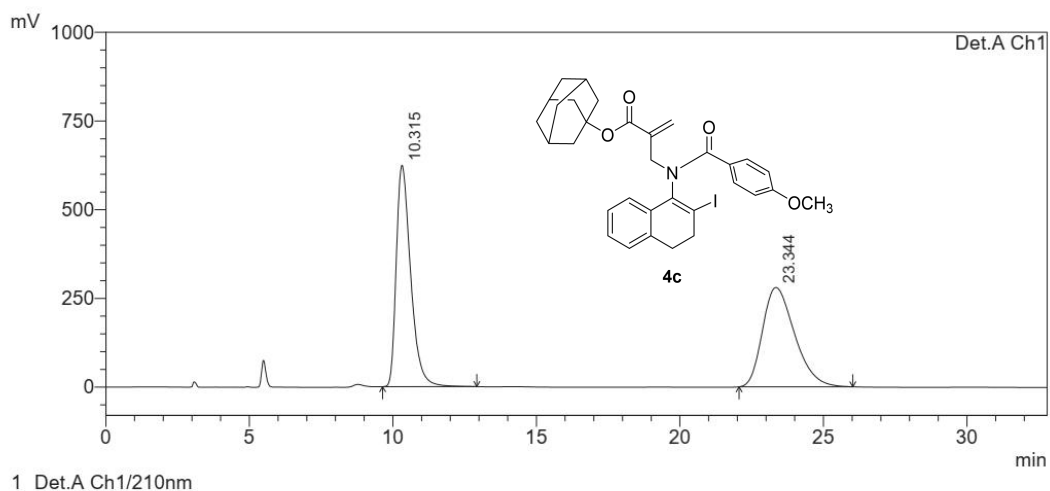

PeakTable

| Peak# | Ret. Time | Area     | Height | Area %  | Height % |
|-------|-----------|----------|--------|---------|----------|
| 1     | 10.315    | 21765398 | 622969 | 49.960  | 69.019   |
| 2     | 23.344    | 21799909 | 279633 | 50.040  | 30.981   |
| Total |           | 43565308 | 902602 | 100.000 | 100.000  |

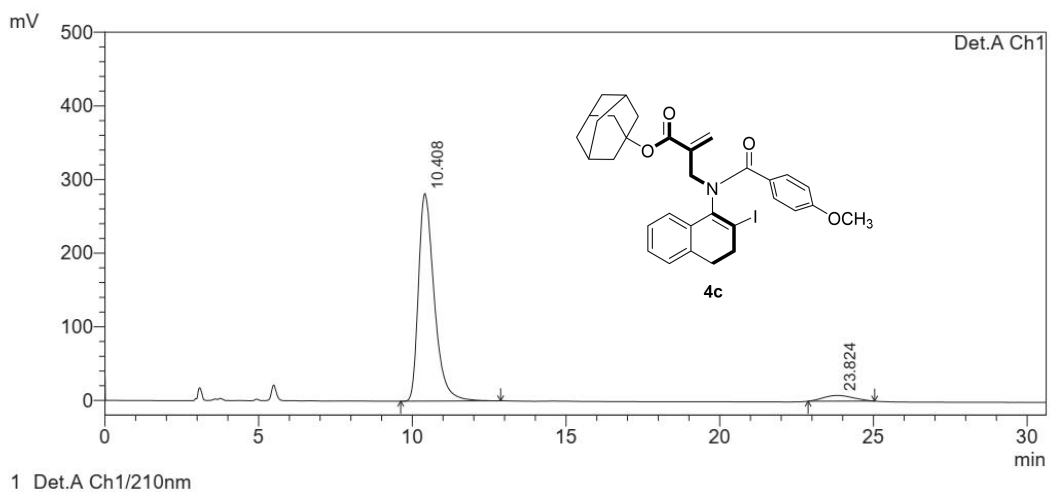

PeakTable

| Peak# | Ret. Time | Area     | Height | Area %  | Height % |
|-------|-----------|----------|--------|---------|----------|
| 1     | 10.408    | 10044910 | 280944 | 95.039  | 97.329   |
| 2     | 23.824    | 524314   | 7710   | 4.961   | 2.671    |
| Total |           | 10569224 | 288654 | 100.000 | 100.000  |

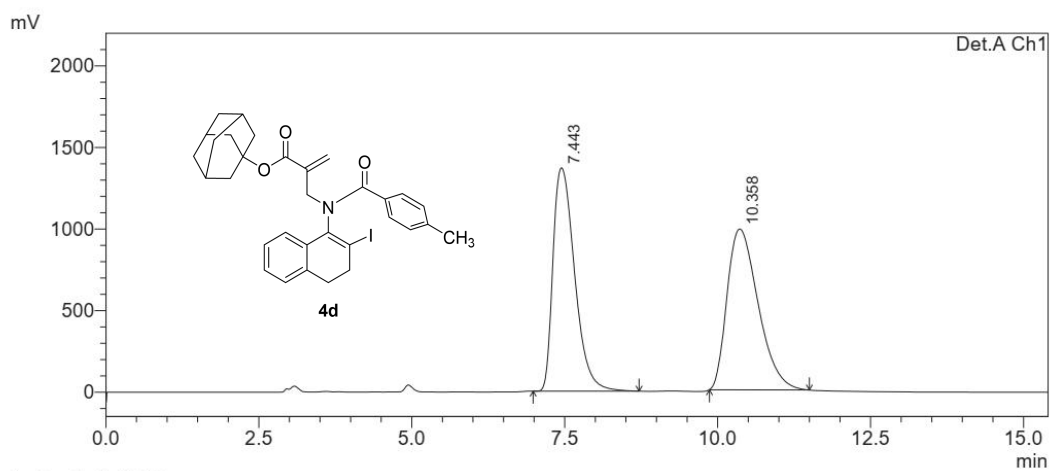

1 Det.A Ch1/210nm

PeakTable

| Peak# | Ret. Time | Area     | Height  | Area %  | Height % |
|-------|-----------|----------|---------|---------|----------|
| 1     | 7.443     | 33731371 | 1368607 | 49.179  | 58.140   |
| 2     | 10.358    | 34858196 | 985397  | 50.821  | 41.860   |
| Total |           | 68589567 | 2354005 | 100.000 | 100.000  |

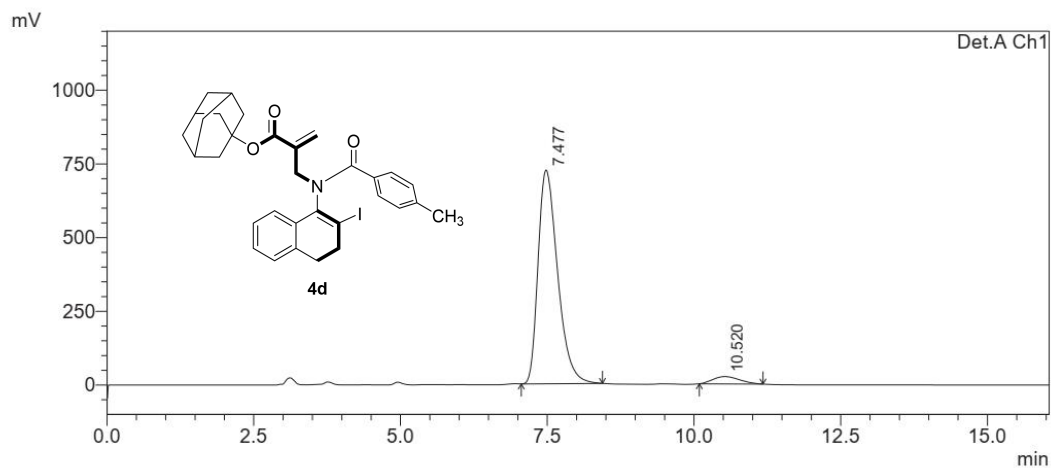

1 Det.A Ch1/210nm

PeakTable

| Peak# | Ret. Time | Area     | Height | Area %  | Height % |
|-------|-----------|----------|--------|---------|----------|
| 1     | 7.477     | 16769893 | 724370 | 95.511  | 96.676   |
| 2     | 10.520    | 788243   | 24909  | 4.489   | 3.324    |
| Total |           | 17558136 | 749279 | 100.000 | 100.000  |

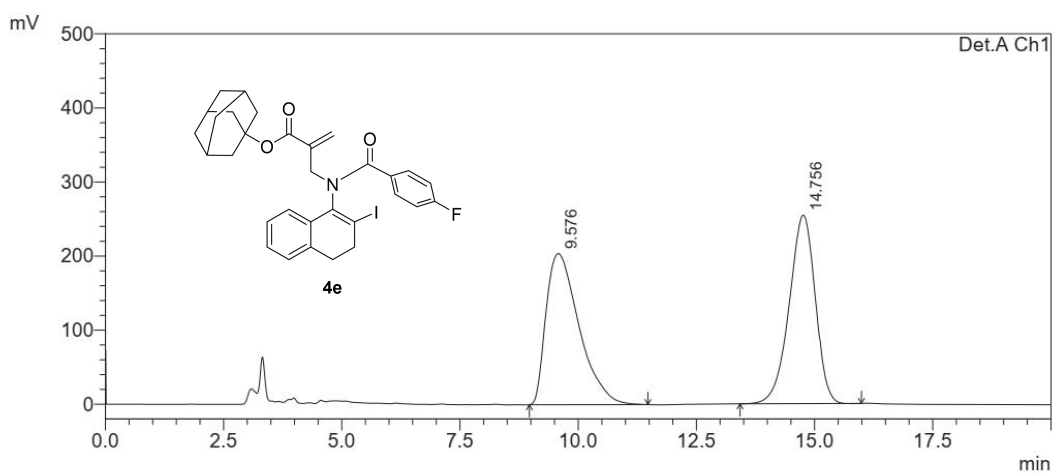

1 Det.A Ch1/210nm

PeakTable

Detector A Ch1 210nm

| Peak# | Ret. Time | Area     | Height | Area %  | Height % |
|-------|-----------|----------|--------|---------|----------|
| 1     | 9.576     | 9900505  | 203907 | 50.367  | 44.558   |
| 2     | 14.756    | 9756068  | 253710 | 49.633  | 55.442   |
| Total |           | 19656573 | 457617 | 100.000 | 100.000  |

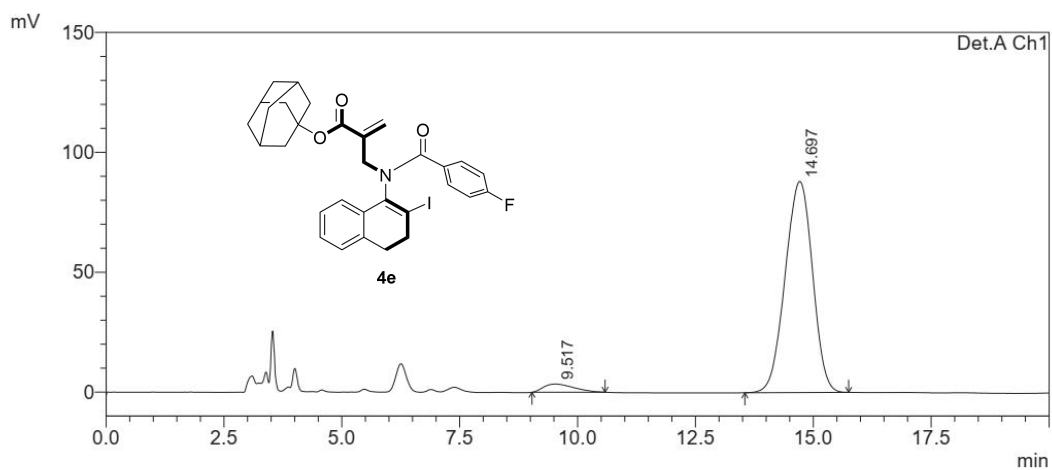

1 Det.A Ch1/210nm

PeakTable

Detector A Ch1 210nm

| Peak# | Ret. Time | Area    | Height | Area %  | Height % |
|-------|-----------|---------|--------|---------|----------|
| 1     | 9.517     | 152454  | 3429   | 4.108   | 3.758    |
| 2     | 14.697    | 3558712 | 87800  | 95.892  | 96.242   |
| Total |           | 3711166 | 91229  | 100.000 | 100.000  |

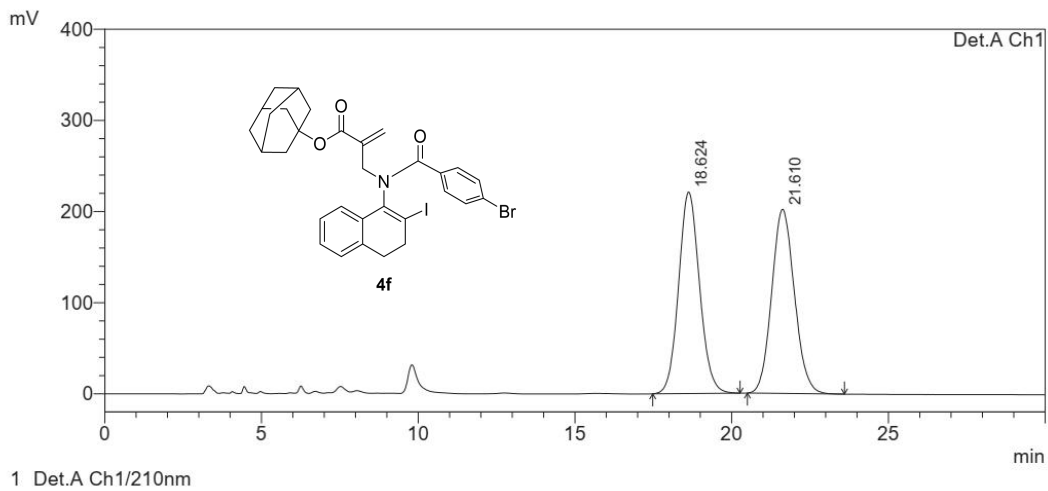

1 Det.A Ch1/210nm

PeakTable

Detector A Ch1 210nm

| Peak# | Ret. Time | Area     | Height | Area %  | Height % |
|-------|-----------|----------|--------|---------|----------|
| 1     | 18.624    | 10247353 | 220912 | 50.158  | 52.280   |
| 2     | 21.610    | 10182682 | 201645 | 49.842  | 47.720   |
| Total |           | 20430035 | 422557 | 100.000 | 100.000  |

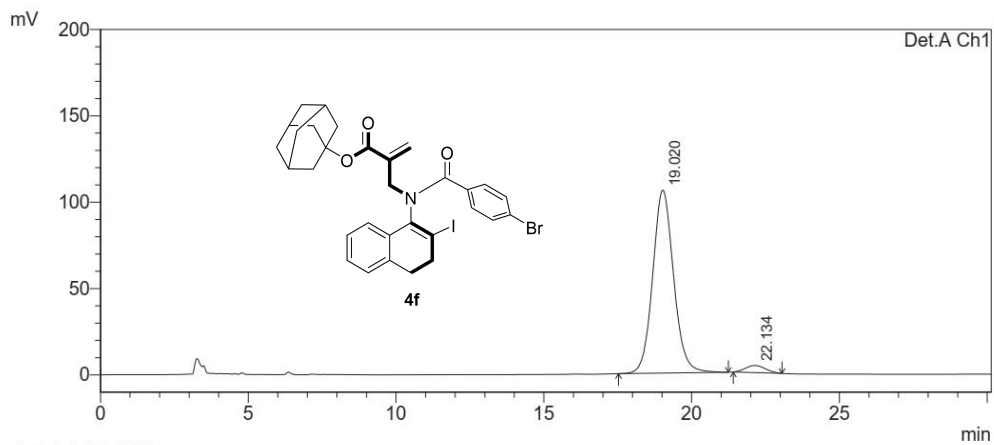

1 Det.A Ch1/210nm

PeakTable

Detector A Ch1 210nm

| Peak# | Ret. Time | Area    | Height | Area %  | Height % |
|-------|-----------|---------|--------|---------|----------|
| 1     | 19.020    | 5207157 | 105919 | 96.423  | 96.249   |
| 2     | 22.134    | 193190  | 4127   | 3.577   | 3.751    |
| Total |           | 5400347 | 110046 | 100.000 | 100.000  |

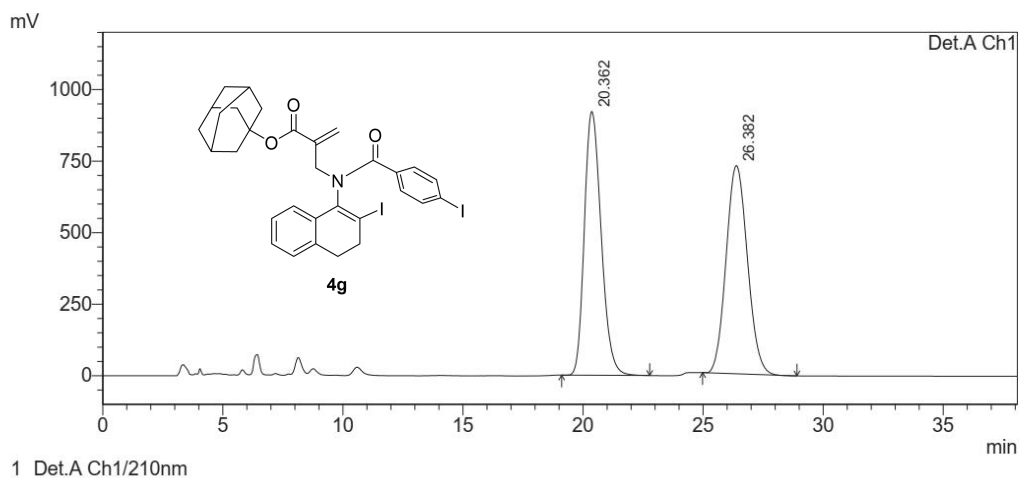

1 Det.A Ch1/210nm

PeakTable

Detector A Ch1 210nm

| Peak# | Ret. Time | Area     | Height  | Area %  | Height % |
|-------|-----------|----------|---------|---------|----------|
| 1     | 20.362    | 44892353 | 920995  | 49.972  | 56.229   |
| 2     | 26.382    | 44942128 | 716929  | 50.028  | 43.771   |
| Total |           | 89834481 | 1637923 | 100.000 | 100.000  |

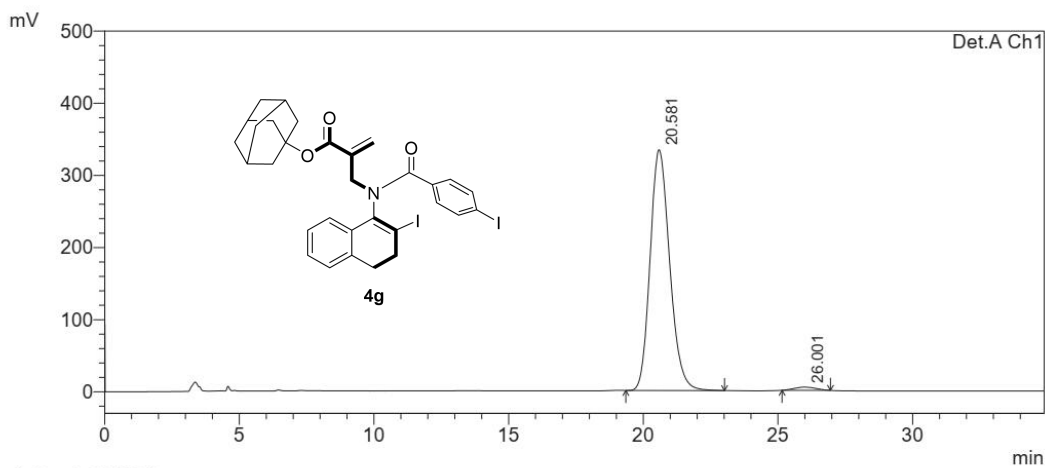

1 Det.A Ch1/210nm

PeakTable

Detector A Ch1 210nm

| Peak# | Ret. Time | Area     | Height | Area %  | Height % |
|-------|-----------|----------|--------|---------|----------|
| 1     | 20.581    | 16863751 | 333273 | 98.540  | 98.679   |
| 2     | 26.001    | 249791   | 4461   | 1.460   | 1.321    |
| Total |           | 17113542 | 337734 | 100.000 | 100.000  |



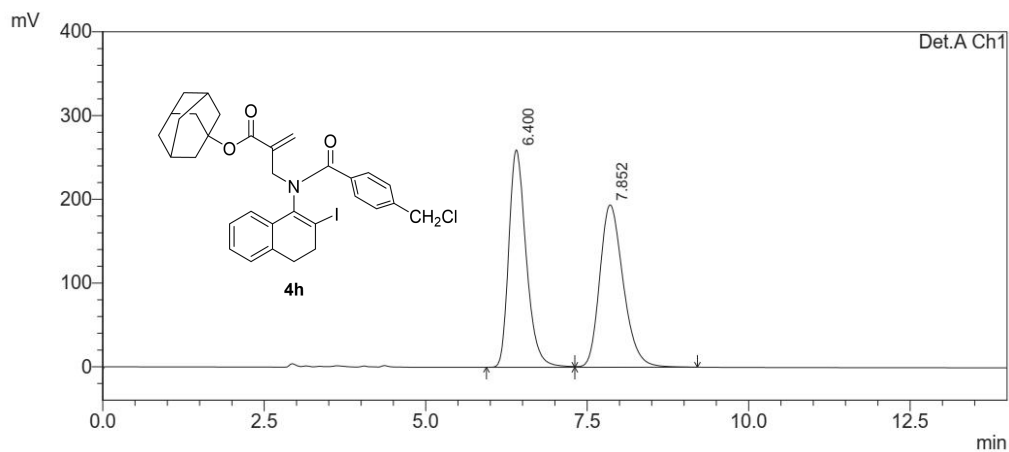

1 Det.A Ch1/210nm

PeakTable

Detector A Ch1 210nm

| Peak# | Ret. Time | Area    | Height | Area %  | Height % |
|-------|-----------|---------|--------|---------|----------|
| 1     | 6.400     | 4870054 | 259453 | 49.839  | 57.243   |
| 2     | 7.852     | 4901457 | 193792 | 50.161  | 42.757   |
| Total |           | 9771511 | 453245 | 100.000 | 100.000  |

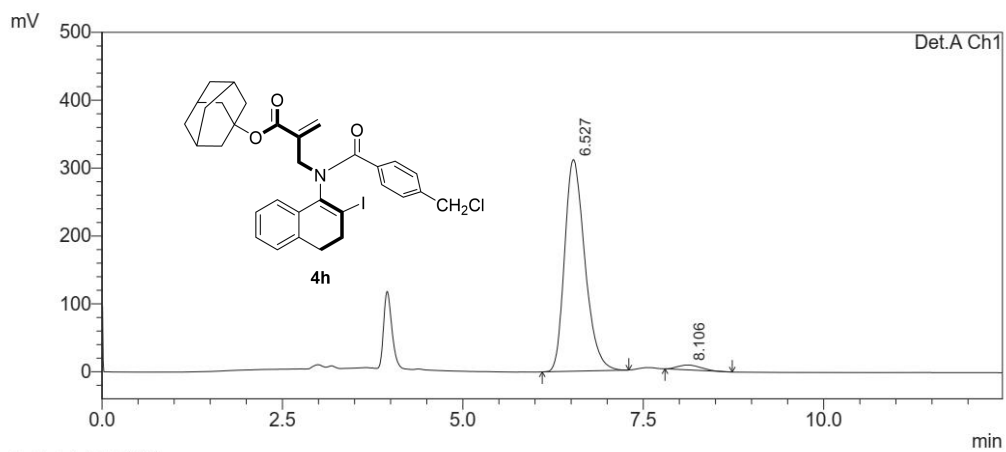

1 Det.A Ch1/210nm

PeakTable

Detector A Ch1 210nm

| Peak# | Ret. Time | Area    | Height | Area %  | Height % |
|-------|-----------|---------|--------|---------|----------|
| 1     | 6.527     | 6092547 | 311610 | 97.410  | 97.743   |
| 2     | 8.106     | 162013  | 7195   | 2.590   | 2.257    |
| Total |           | 6254560 | 318805 | 100.000 | 100.000  |

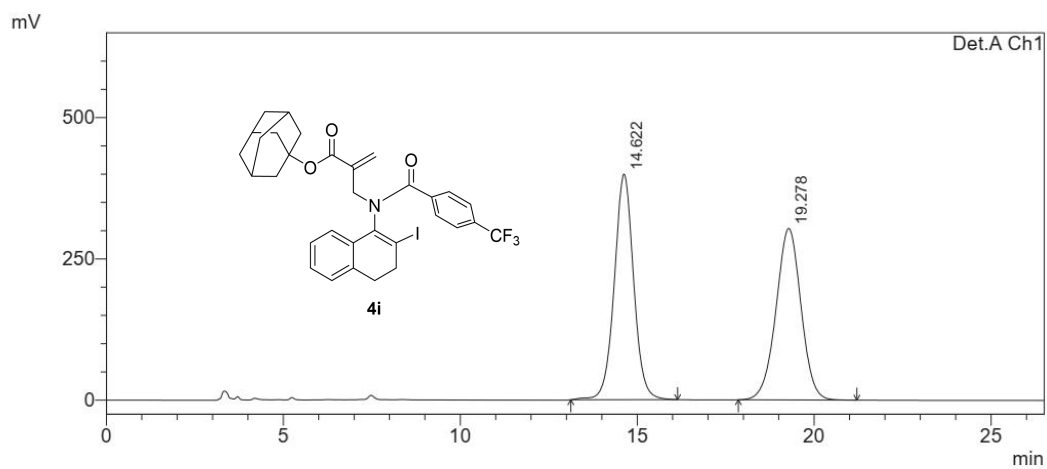

1 Det.A Ch1/210nm

PeakTable

Detector A Ch1 210nm

| Peak# | Ret. Time | Area     | Height | Area %  | Height % |
|-------|-----------|----------|--------|---------|----------|
| 1     | 14.622    | 15193792 | 398997 | 50.487  | 56.829   |
| 2     | 19.278    | 14900928 | 303106 | 49.513  | 43.171   |
| Total |           | 30094720 | 702103 | 100.000 | 100.000  |

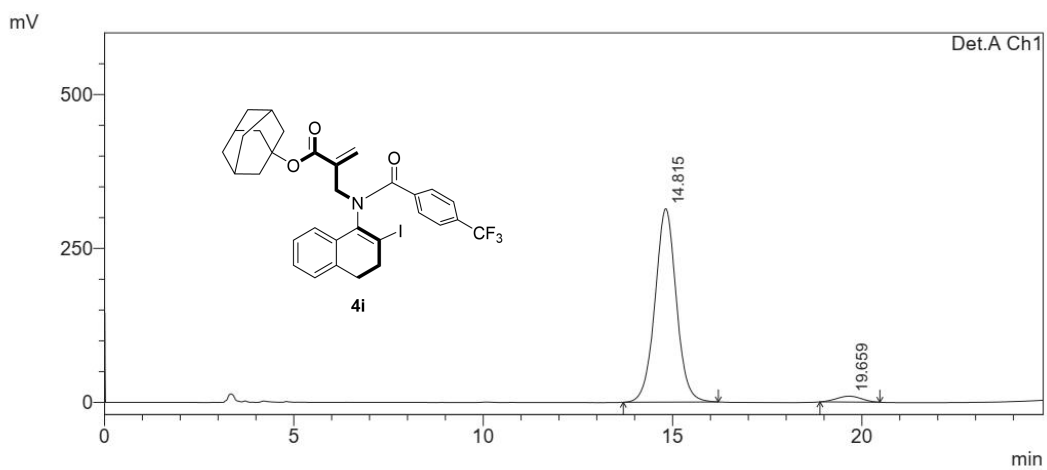

1 Det.A Ch1/210nm

PeakTable

Detector A Ch1 210nm

| Peak# | Ret. Time | Area     | Height | Area %  | Height % |
|-------|-----------|----------|--------|---------|----------|
| 1     | 14.815    | 12256058 | 314193 | 96.565  | 97.040   |
| 2     | 19.659    | 435992   | 9583   | 3.435   | 2.960    |
| Total |           | 12692050 | 323775 | 100.000 | 100.000  |

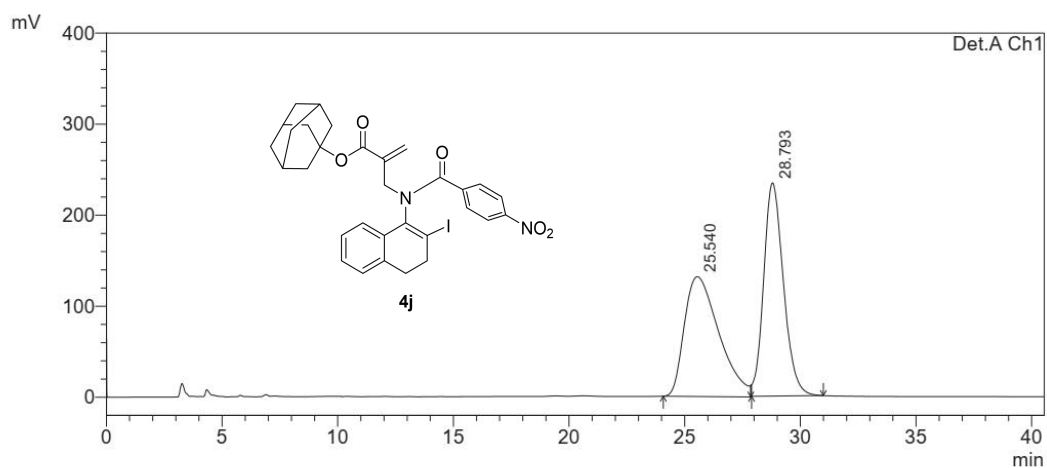

1 Det.A Ch1/210nm

PeakTable

Detector A Ch1 210nm

| Peak# | Ret. Time | Area     | Height | Area %  | Height % |
|-------|-----------|----------|--------|---------|----------|
| 1     | 25.540    | 13660271 | 131591 | 49.567  | 35.993   |
| 2     | 28.793    | 13899150 | 234005 | 50.433  | 64.007   |
| Total |           | 27559420 | 365596 | 100.000 | 100.000  |

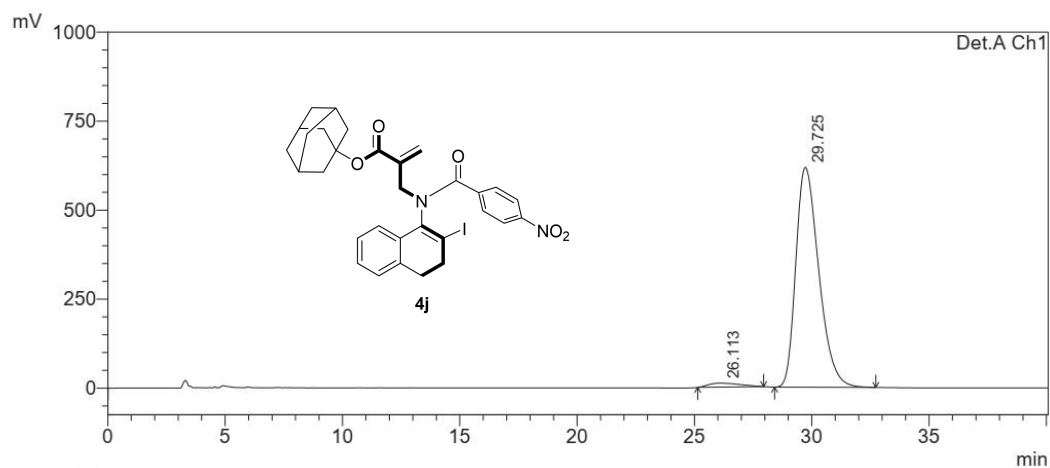

1 Det.A Ch1/210nm

PeakTable

Detector A Ch1 210nm

| Peak# | Ret. Time | Area     | Height | Area %  | Height % |
|-------|-----------|----------|--------|---------|----------|
| 1     | 26.113    | 1059831  | 11357  | 2.458   | 1.806    |
| 2     | 29.725    | 42050092 | 617432 | 97.542  | 98.194   |
| Total |           | 43109923 | 628790 | 100.000 | 100.000  |

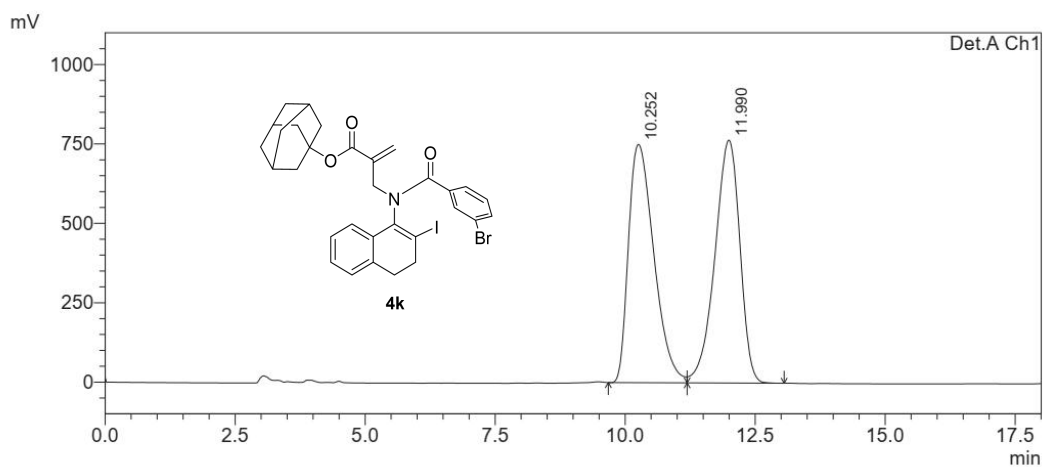

1 Det.A Ch1/210nm

PeakTable

Detector A Ch1 210nm

| Peak# | Ret. Time | Area     | Height  | Area %  | Height % |
|-------|-----------|----------|---------|---------|----------|
| 1     | 10.252    | 25509459 | 750550  | 49.968  | 49.601   |
| 2     | 11.990    | 25542448 | 762623  | 50.032  | 50.399   |
| Total |           | 51051907 | 1513173 | 100.000 | 100.000  |

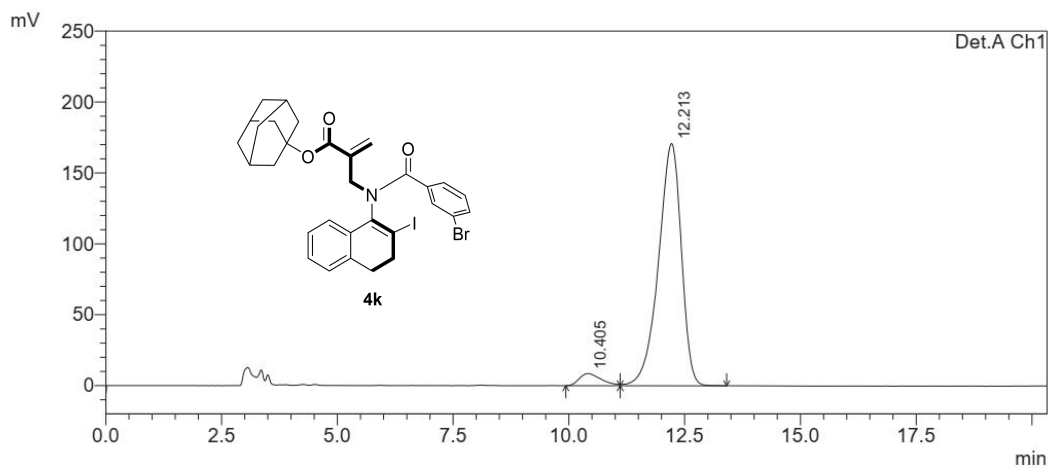

1 Det.A Ch1/210nm

PeakTable

Detector A Ch1 210nm

| Peak# | Ret. Time | Area    | Height | Area %  | Height % |
|-------|-----------|---------|--------|---------|----------|
| 1     | 10.405    | 280906  | 8532   | 4.580   | 4.768    |
| 2     | 12.213    | 5852167 | 170421 | 95.420  | 95.232   |
| Total |           | 6133073 | 178952 | 100.000 | 100.000  |

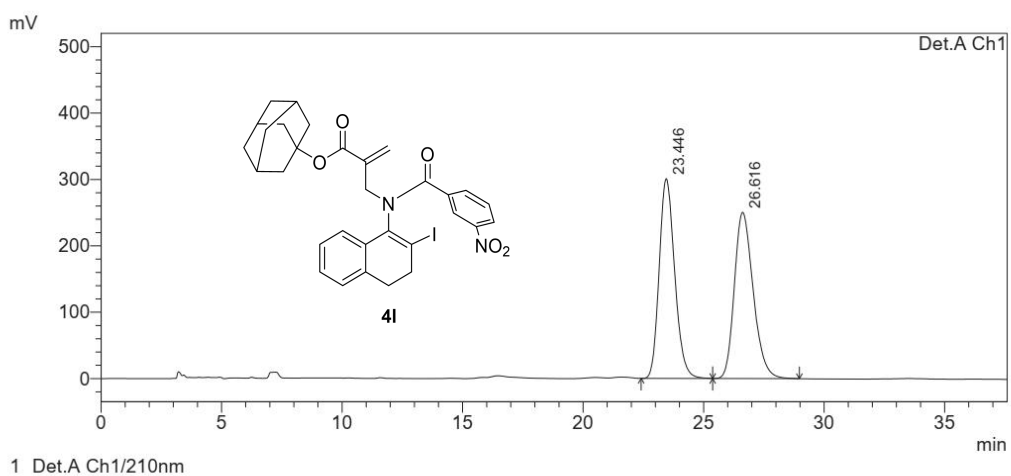

1 Det.A Ch1/210nm

PeakTable

| Peak# | Ret. Time | Area     | Height | Area %  | Height % |
|-------|-----------|----------|--------|---------|----------|
| 1     | 23.446    | 13453277 | 300508 | 49.725  | 54.584   |
| 2     | 26.616    | 13601835 | 250033 | 50.275  | 45.416   |
| Total |           | 27055112 | 550540 | 100.000 | 100.000  |

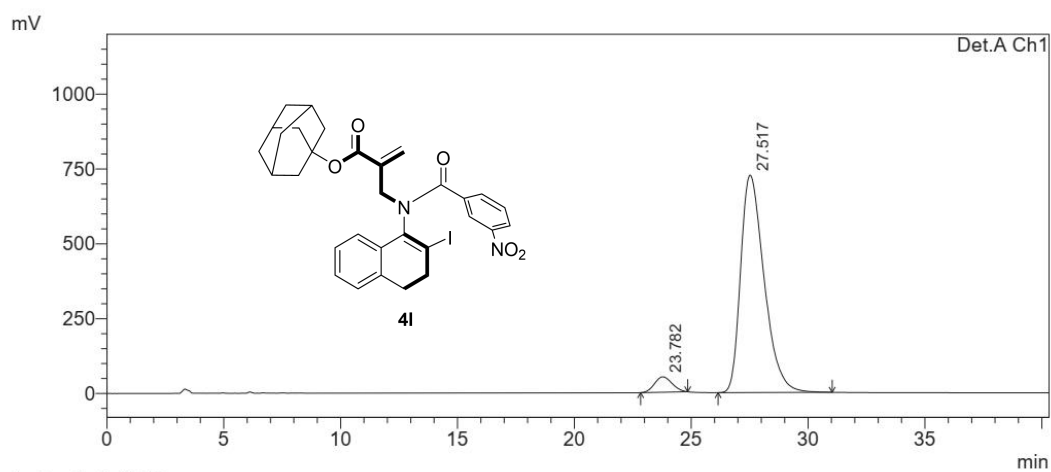

1 Det.A Ch1/210nm

PeakTable

| Peak# | Ret. Time | Area     | Height | Area %  | Height % |
|-------|-----------|----------|--------|---------|----------|
| 1     | 23.782    | 2675434  | 51441  | 5.009   | 6.617    |
| 2     | 27.517    | 50739812 | 725965 | 94.991  | 93.383   |
| Total |           | 53415246 | 777406 | 100.000 | 100.000  |

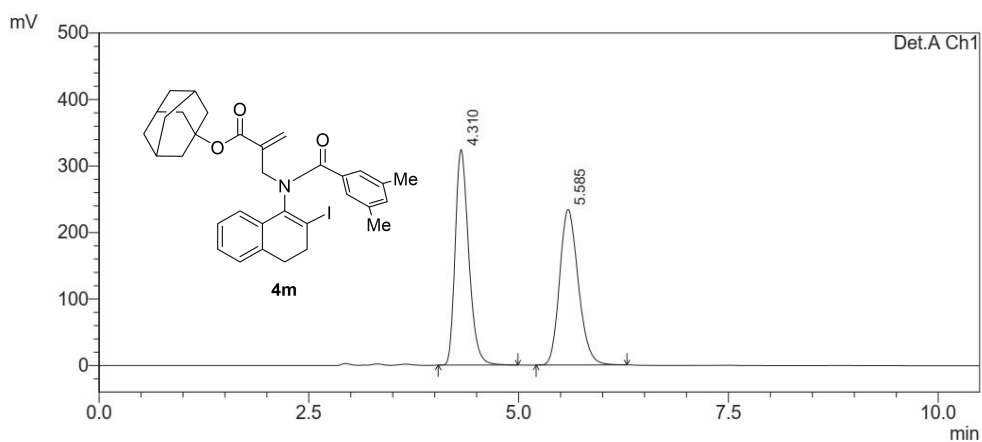

1 Det.A Ch1/210nm

PeakTable

| Peak# | Ret. Time | Area    | Height | Area %  | Height % |
|-------|-----------|---------|--------|---------|----------|
| 1     | 4.310     | 3627656 | 322336 | 49.966  | 57.969   |
| 2     | 5.585     | 3632543 | 233713 | 50.034  | 42.031   |
| Total |           | 7260199 | 556048 | 100.000 | 100.000  |

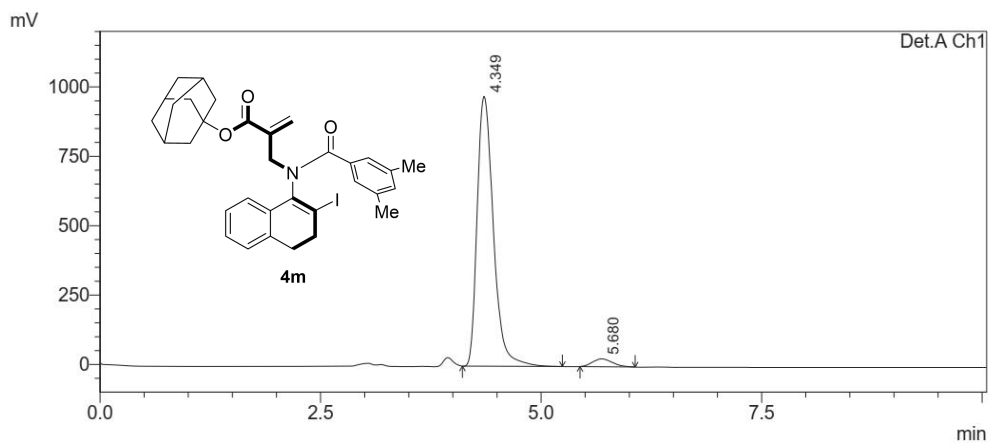

1 Det.A Ch1/210nm

PeakTable

| Peak# | Ret. Time | Area     | Height  | Area %  | Height % |
|-------|-----------|----------|---------|---------|----------|
| 1     | 4.349     | 12438234 | 971879  | 96.565  | 97.167   |
| 2     | 5.680     | 442484   | 28333   | 3.435   | 2.833    |
| Total |           | 12880718 | 1000212 | 100.000 | 100.000  |

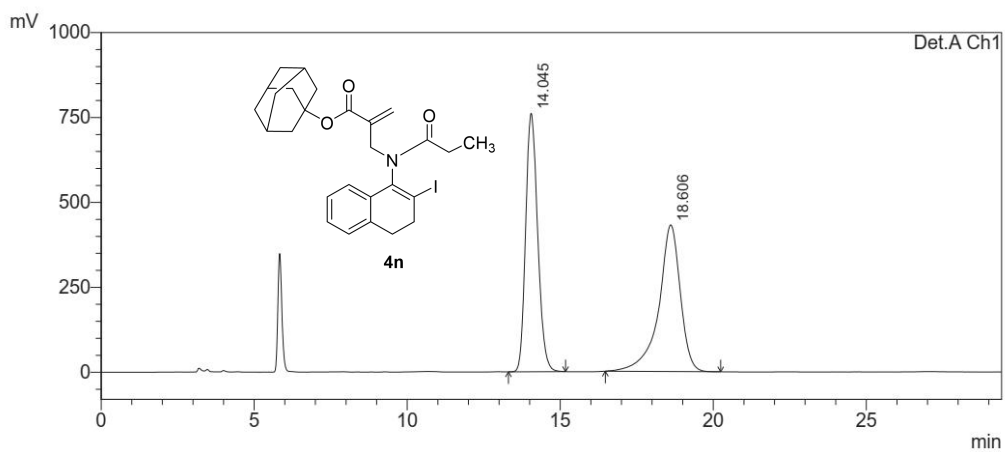

1 Det.A Ch1/210nm

PeakTable

Detector A Ch1 210nm

| Peak# | Ret. Time | Area     | Height  | Area %  | Height % |
|-------|-----------|----------|---------|---------|----------|
| 1     | 14.045    | 20750894 | 757616  | 49.577  | 63.761   |
| 2     | 18.606    | 21104737 | 430588  | 50.423  | 36.239   |
| Total |           | 41855631 | 1188204 | 100.000 | 100.000  |

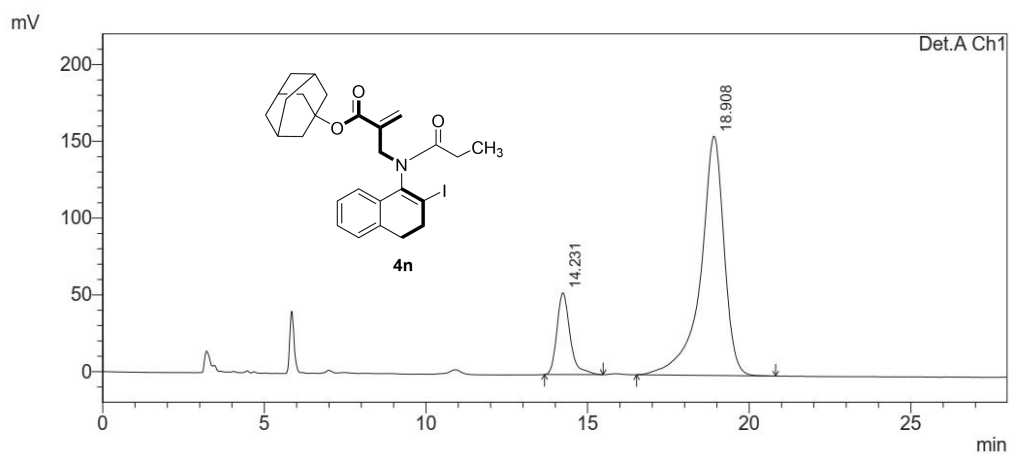

1 Det.A Ch1/210nm

PeakTable

Detector A Ch1 210nm

| Peak# | Ret. Time | Area    | Height | Area %  | Height % |
|-------|-----------|---------|--------|---------|----------|
| 1     | 14.231    | 1505716 | 53172  | 16.062  | 25.486   |
| 2     | 18.908    | 7868707 | 155459 | 83.938  | 74.514   |
| Total |           | 9374423 | 208631 | 100.000 | 100.000  |

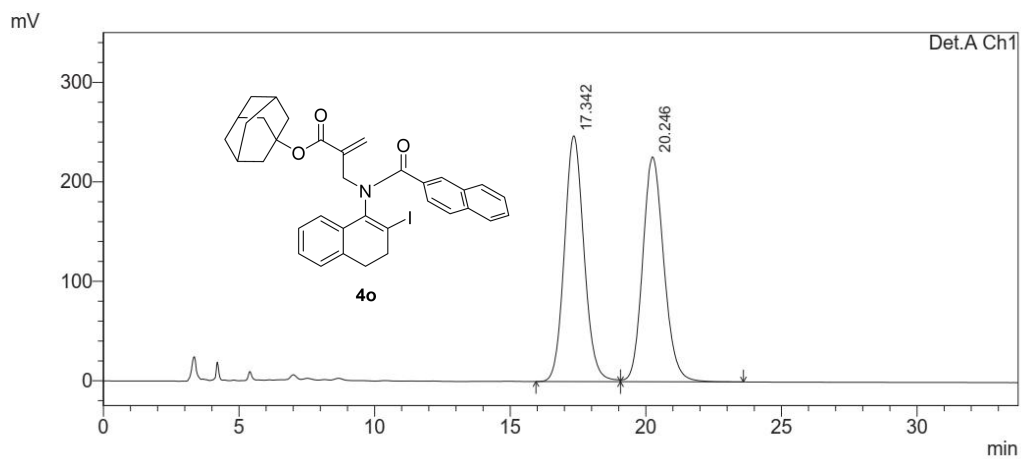

1 Det.A Ch1/210nm

PeakTable

Detector A Ch1 210nm

| Peak# | Ret. Time | Area     | Height | Area %  | Height % |
|-------|-----------|----------|--------|---------|----------|
| 1     | 17.342    | 12410368 | 246896 | 50.313  | 52.213   |
| 2     | 20.246    | 12256040 | 225970 | 49.687  | 47.787   |
| Total |           | 24666408 | 472866 | 100.000 | 100.000  |

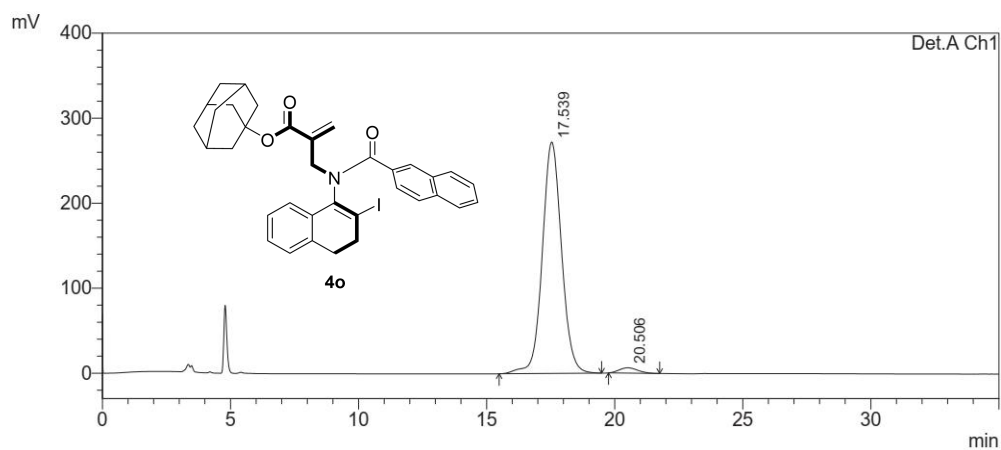

1 Det.A Ch1/210nm

PeakTable

Detector A Ch1 210nm

| Peak# | Ret. Time | Area     | Height | Area %  | Height % |
|-------|-----------|----------|--------|---------|----------|
| 1     | 17.539    | 14203359 | 272119 | 97.812  | 97.746   |
| 2     | 20.506    | 317693   | 6274   | 2.188   | 2.254    |
| Total |           | 14521053 | 278393 | 100.000 | 100.000  |



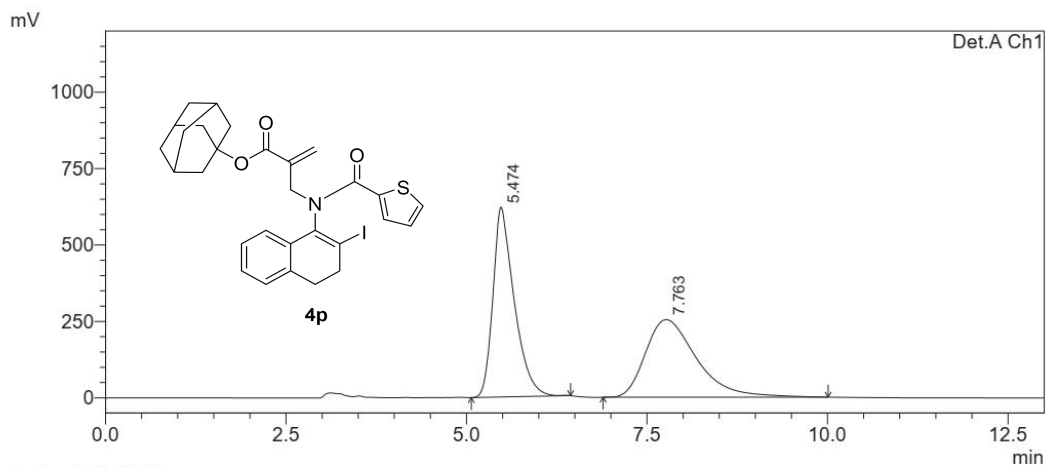

1 Det.A Ch1/210nm

PeakTable

Detector A Ch1 210nm

| Peak# | Ret. Time | Area     | Height | Area %  | Height % |
|-------|-----------|----------|--------|---------|----------|
| 1     | 5.474     | 12699639 | 619157 | 50.431  | 70.926   |
| 2     | 7.763     | 12482432 | 253810 | 49.569  | 29.074   |
| Total |           | 25182071 | 872967 | 100.000 | 100.000  |

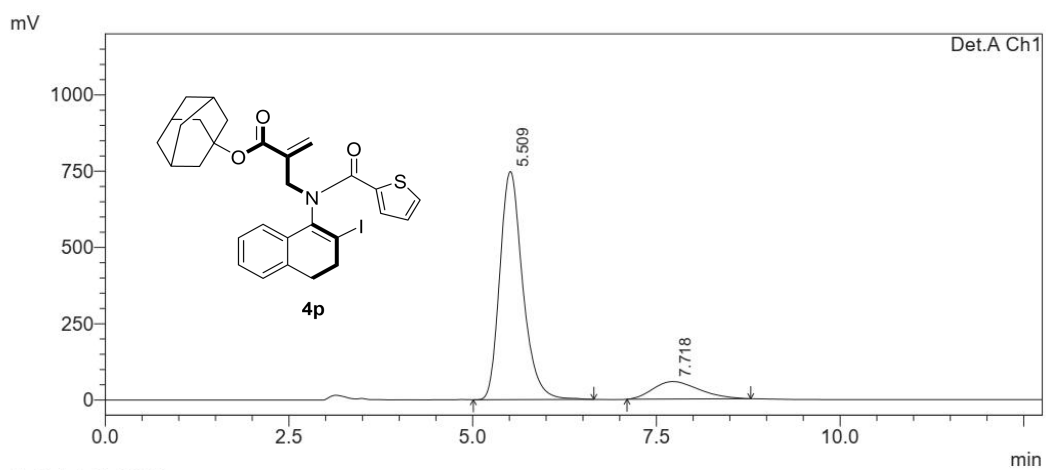

1 Det.A Ch1/210nm

PeakTable

Detector A Ch1 210nm

| Peak# | Ret. Time | Area     | Height | Area %  | Height % |
|-------|-----------|----------|--------|---------|----------|
| 1     | 5.509     | 16195940 | 747545 | 86.664  | 92.892   |
| 2     | 7.718     | 2492173  | 57202  | 13.336  | 7.108    |
| Total |           | 18688113 | 804746 | 100.000 | 100.000  |

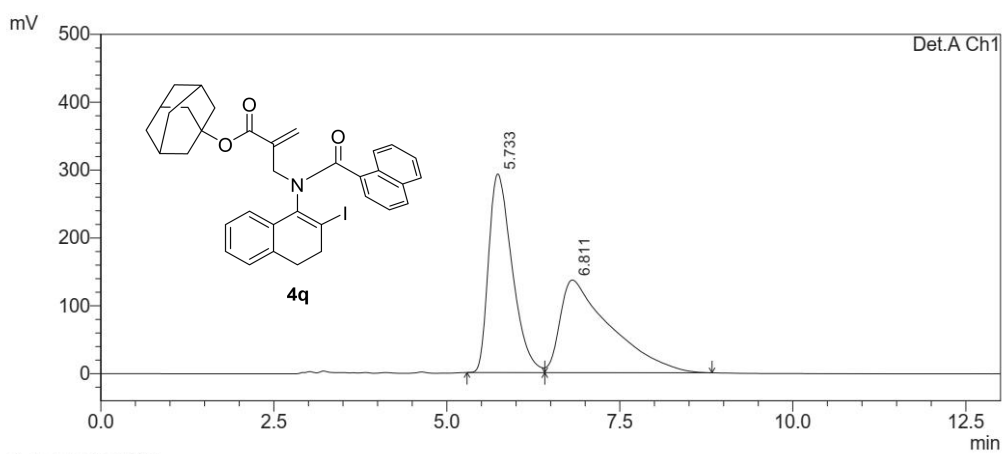

1 Det.A Ch1/210nm

PeakTable

Detector A Ch1 210nm

| Peak# | Ret. Time | Area     | Height | Area %  | Height % |
|-------|-----------|----------|--------|---------|----------|
| 1     | 5.733     | 6947378  | 292159 | 50.155  | 68.167   |
| 2     | 6.811     | 6904433  | 136431 | 49.845  | 31.833   |
| Total |           | 13851811 | 428590 | 100.000 | 100.000  |

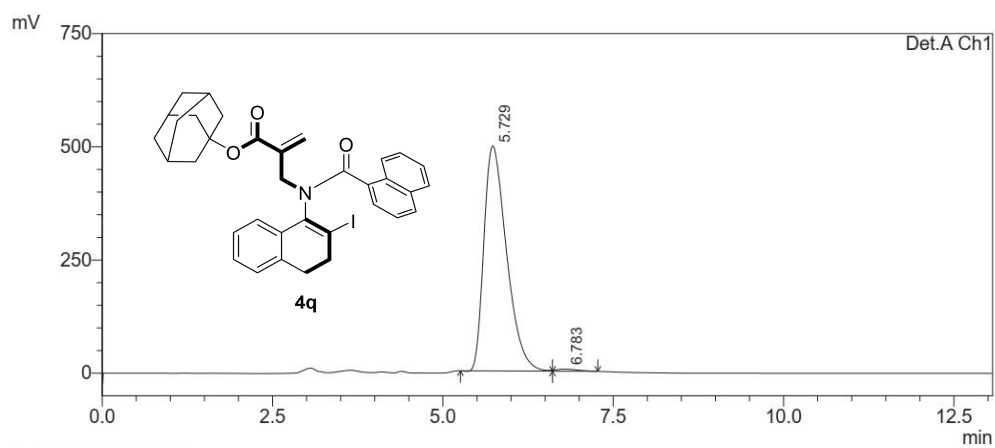

1 Det.A Ch1/210nm

PeakTable

Detector A Ch1 210nm

| Peak# | Ret. Time | Area     | Height | Area %  | Height % |
|-------|-----------|----------|--------|---------|----------|
| 1     | 5.729     | 11509553 | 496487 | 99.122  | 99.098   |
| 2     | 6.783     | 101907   | 4522   | 0.878   | 0.902    |
| Total |           | 11611461 | 501009 | 100.000 | 100.000  |

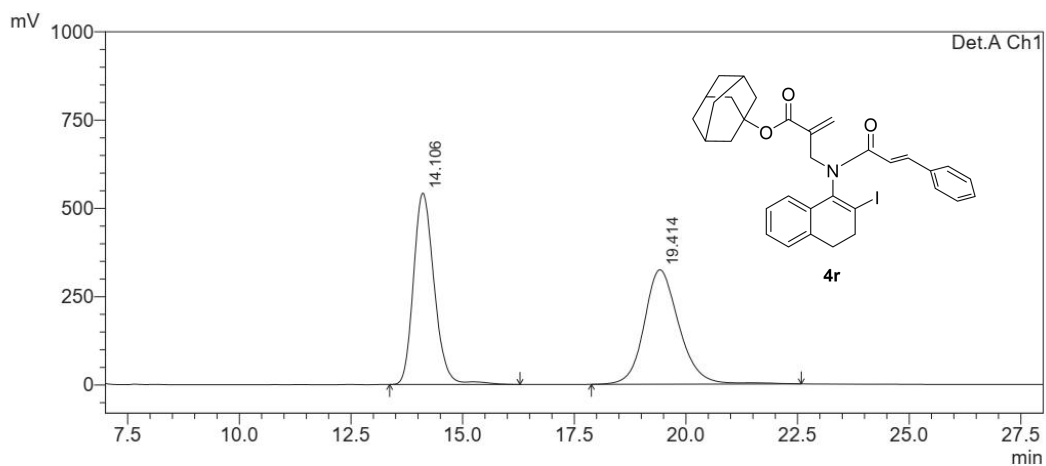

1 Det.A Ch1/210nm

PeakTable

Detector A Ch1 210nm

| Peak# | Ret. Time | Area     | Height | Area %  | Height % |
|-------|-----------|----------|--------|---------|----------|
| 1     | 14.106    | 17498045 | 541057 | 49.866  | 62.583   |
| 2     | 19.414    | 17591905 | 323482 | 50.134  | 37.417   |
| Total |           | 35089950 | 864539 | 100.000 | 100.000  |

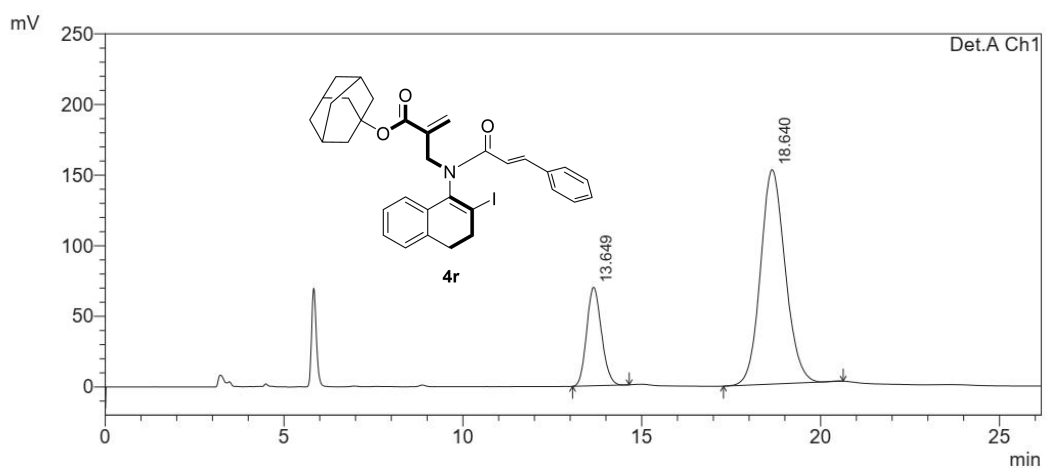

1 Det.A Ch1/210nm

PeakTable

Detector A Ch1 210nm

| Peak# | Ret. Time | Area    | Height | Area %  | Height % |
|-------|-----------|---------|--------|---------|----------|
| 1     | 13.649    | 2008203 | 69687  | 21.577  | 31.480   |
| 2     | 18.640    | 7298952 | 151681 | 78.423  | 68.520   |
| Total |           | 9307154 | 221368 | 100.000 | 100.000  |

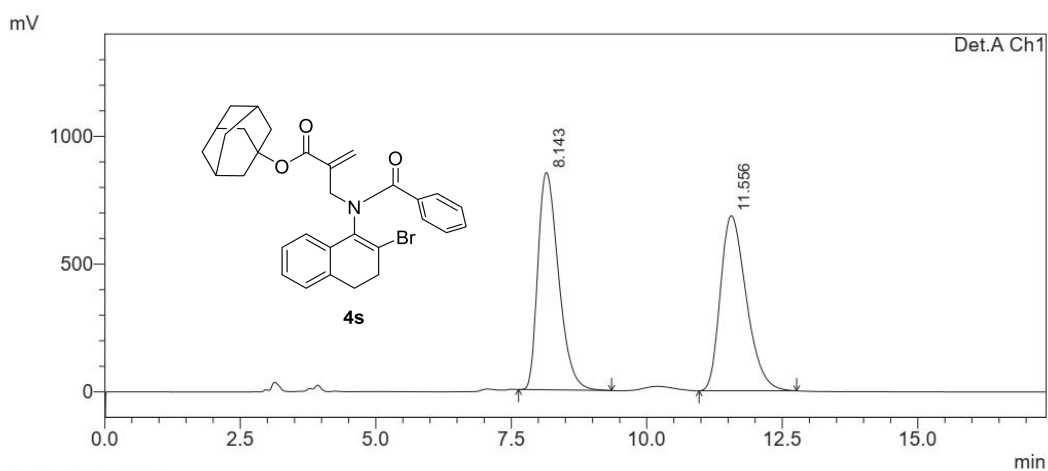

1 Det.A Ch1/210nm

PeakTable

| Peak# | Ret. Time | Area     | Height  | Area %  | Height % |
|-------|-----------|----------|---------|---------|----------|
| 1     | 8.143     | 22547685 | 849911  | 49.674  | 55.405   |
| 2     | 11.556    | 22843218 | 684099  | 50.326  | 44.595   |
| Total |           | 45390903 | 1534010 | 100.000 | 100.000  |

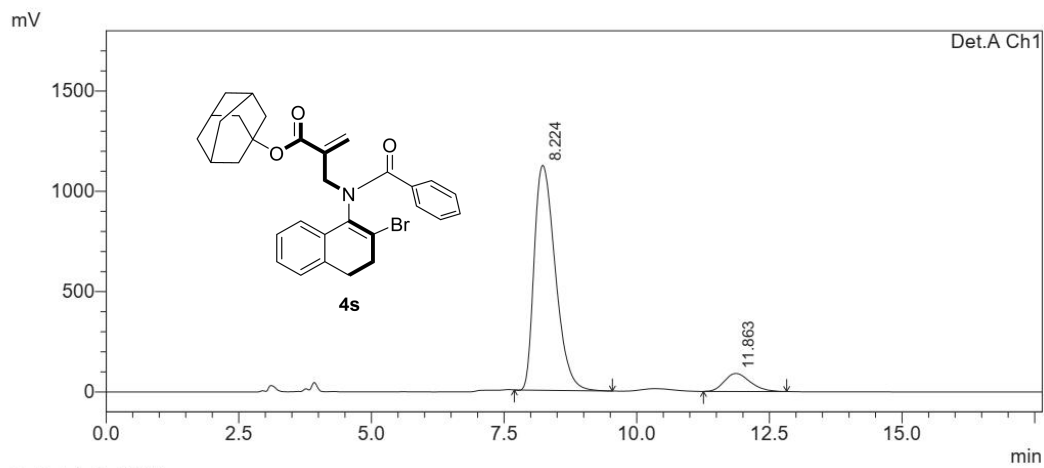

1 Det.A Ch1/210nm

PeakTable

| Peak# | Ret. Time | Area     | Height  | Area %  | Height % |
|-------|-----------|----------|---------|---------|----------|
| 1     | 8.224     | 31049033 | 1120216 | 91.071  | 92.570   |
| 2     | 11.863    | 3044193  | 89910   | 8.929   | 7.430    |
| Total |           | 34093226 | 1210126 | 100.000 | 100.000  |

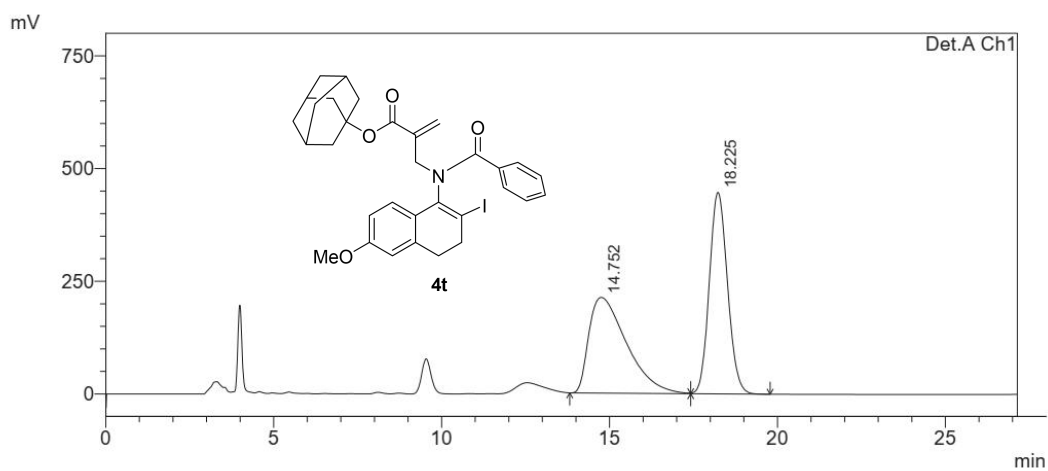

1 Det.A Ch1/210nm

PeakTable

| Peak# | Ret. Time | Area     | Height | Area %  | Height % |
|-------|-----------|----------|--------|---------|----------|
| 1     | 14.752    | 16549238 | 212125 | 49.614  | 32.212   |
| 2     | 18.225    | 16806826 | 446409 | 50.386  | 67.788   |
| Total |           | 33356064 | 658533 | 100.000 | 100.000  |

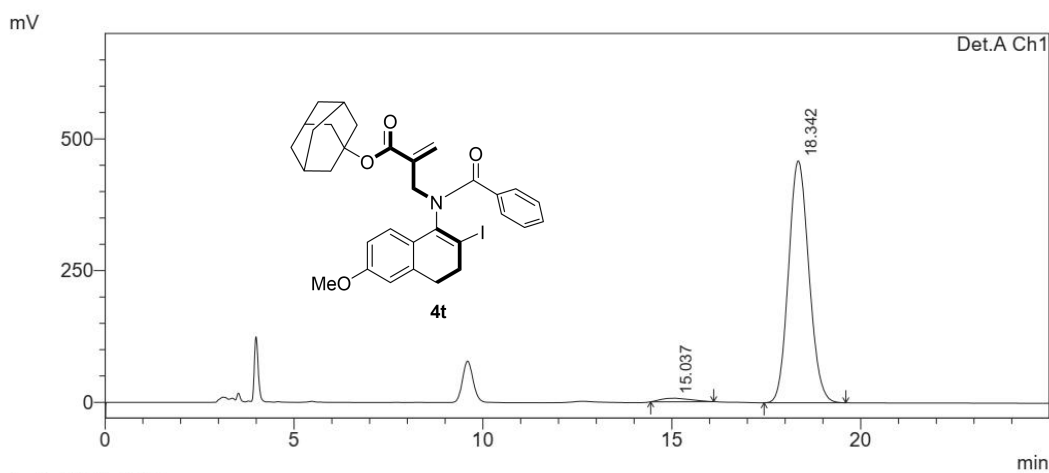

1 Det.A Ch1/210nm

PeakTable

| Peak# | Ret. Time | Area     | Height | Area %  | Height % |
|-------|-----------|----------|--------|---------|----------|
| 1     | 15.037    | 374291   | 6838   | 2.125   | 1.472    |
| 2     | 18.342    | 17241831 | 457616 | 97.875  | 98.528   |
| Total |           | 17616123 | 464454 | 100.000 | 100.000  |

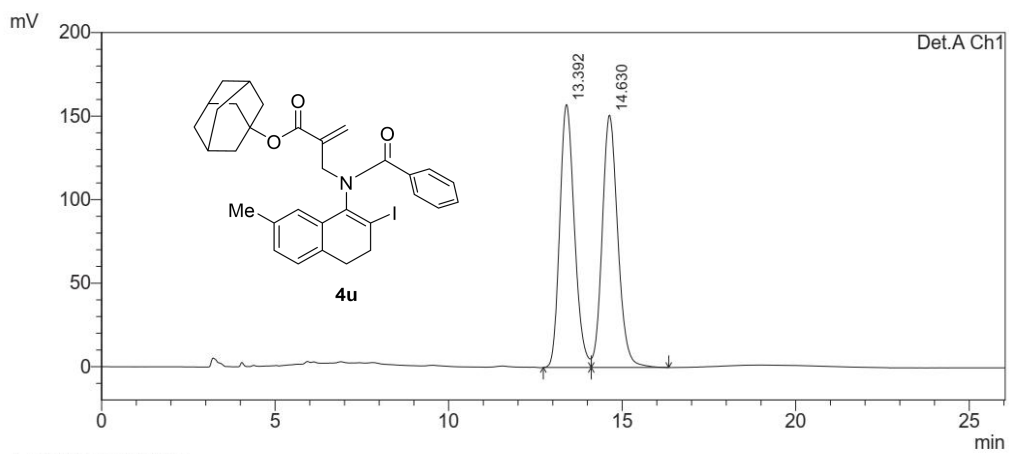

1 Det.A Ch1/210nm

PeakTable

| Peak# | Ret. Time | Area    | Height | Area %  | Height % |
|-------|-----------|---------|--------|---------|----------|
| 1     | 13.392    | 4619669 | 157222 | 49.582  | 51.028   |
| 2     | 14.630    | 4697542 | 150889 | 50.418  | 48.972   |
| Total |           | 9317210 | 308111 | 100.000 | 100.000  |

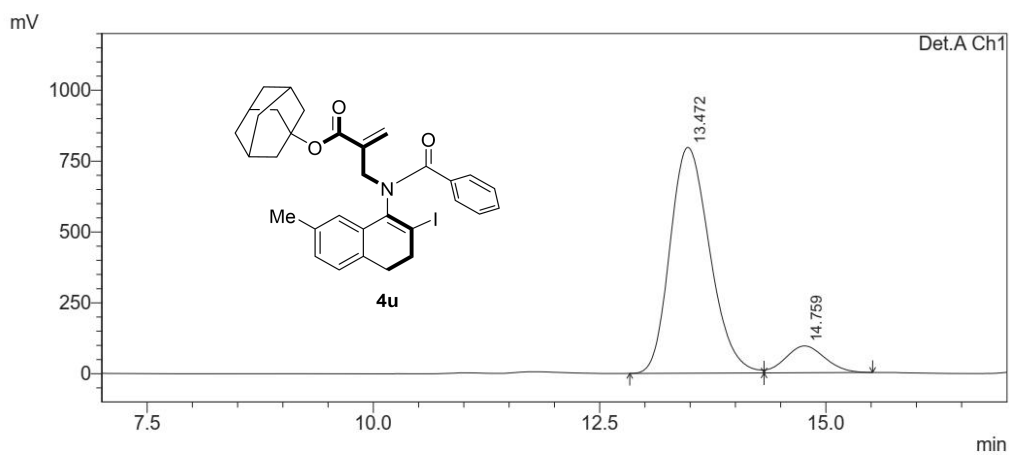

1 Det.A Ch1/210nm

PeakTable

| Peak# | Ret. Time | Area     | Height | Area %  | Height % |
|-------|-----------|----------|--------|---------|----------|
| 1     | 13.472    | 24339482 | 795675 | 89.493  | 89.390   |
| 2     | 14.759    | 2857631  | 94441  | 10.507  | 10.610   |
| Total |           | 27197113 | 890116 | 100.000 | 100.000  |

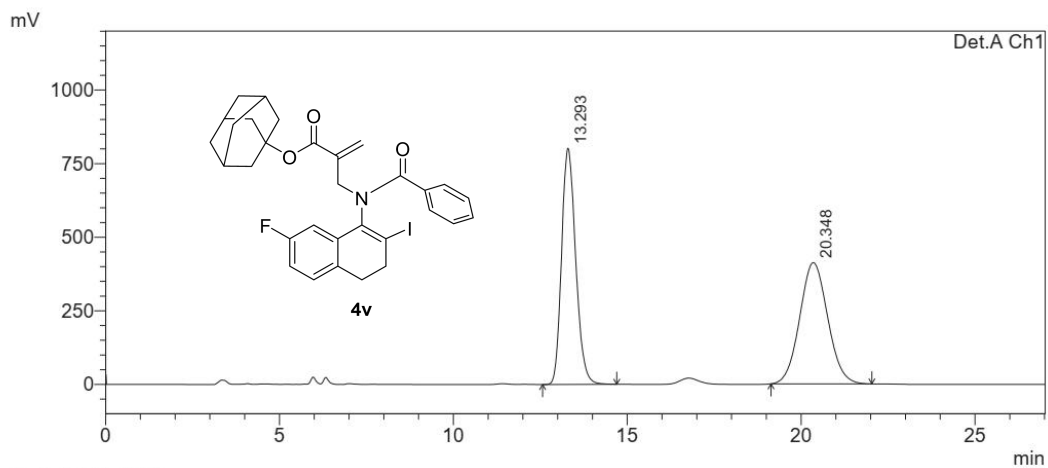

1 Det.A Ch1/210nm

PeakTable

Detector A Ch1 210nm

| Peak# | Ret. Time | Area     | Height  | Area %  | Height % |
|-------|-----------|----------|---------|---------|----------|
| 1     | 13.293    | 22681704 | 800333  | 49.584  | 66.068   |
| 2     | 20.348    | 23062631 | 411052  | 50.416  | 33.932   |
| Total |           | 45744335 | 1211385 | 100.000 | 100.000  |

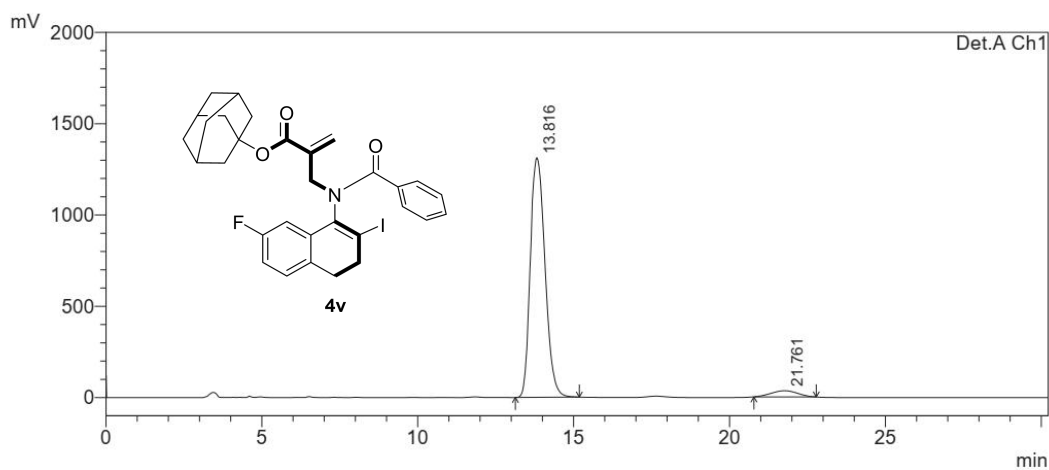

1 Det.A Ch1/210nm

PeakTable

Detector A Ch1 210nm

| Peak# | Ret. Time | Area     | Height  | Area %  | Height % |
|-------|-----------|----------|---------|---------|----------|
| 1     | 13.816    | 43108935 | 1308226 | 95.566  | 97.479   |
| 2     | 21.761    | 2000064  | 33827   | 4.434   | 2.521    |
| Total |           | 45108999 | 1342053 | 100.000 | 100.000  |

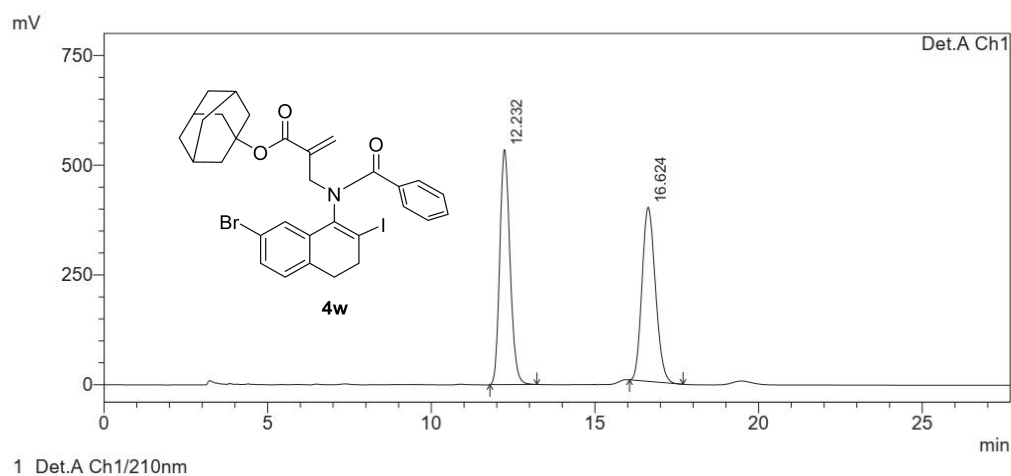

1 Det.A Ch1/210nm

PeakTable

| Peak# | Ret. Time | Area     | Height | Area %  | Height % |
|-------|-----------|----------|--------|---------|----------|
| 1     | 12.232    | 11656606 | 534977 | 50.662  | 57.909   |
| 2     | 16.624    | 11352122 | 388853 | 49.338  | 42.091   |
| Total |           | 23008728 | 923831 | 100.000 | 100.000  |

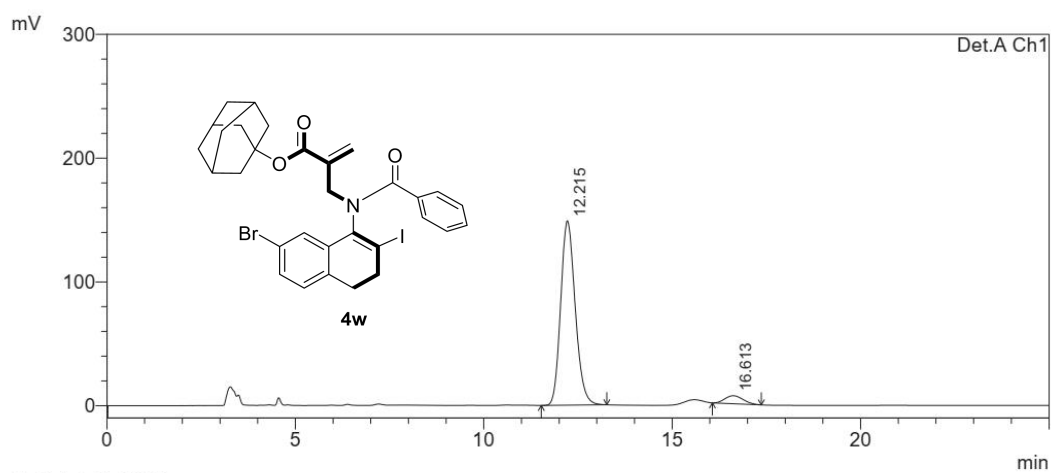

1 Det.A Ch1/210nm

PeakTable

| Peak# | Ret. Time | Area    | Height | Area %  | Height % |
|-------|-----------|---------|--------|---------|----------|
| 1     | 12.215    | 4001247 | 148842 | 94.831  | 95.832   |
| 2     | 16.613    | 218120  | 6474   | 5.169   | 4.168    |
| Total |           | 4219367 | 155316 | 100.000 | 100.000  |



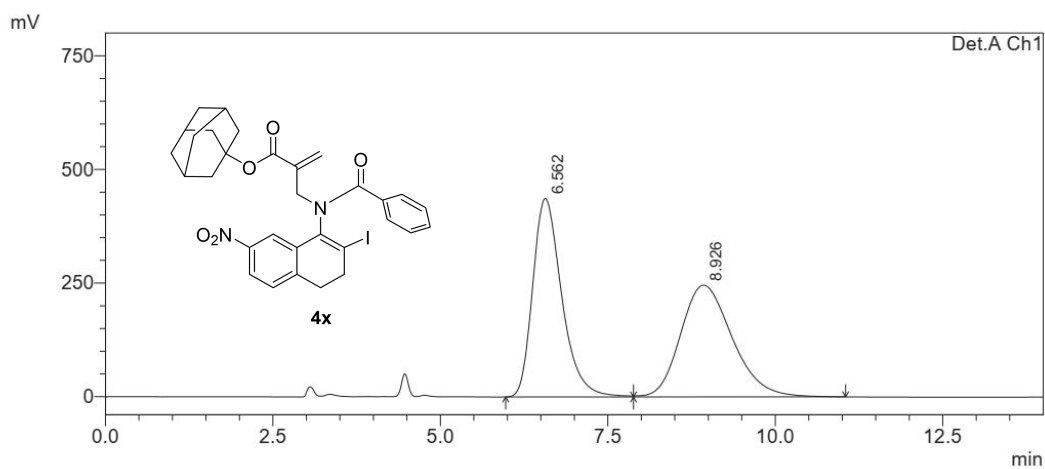

1 Det.A Ch1/210nm

PeakTable

Detector A Ch1 210nm

| Peak# | Ret. Time | Area     | Height | Area %  | Height % |
|-------|-----------|----------|--------|---------|----------|
| 1     | 6.562     | 13167138 | 436464 | 49.939  | 63.965   |
| 2     | 8.926     | 13199310 | 245883 | 50.061  | 36.035   |
| Total |           | 26366449 | 682346 | 100.000 | 100.000  |

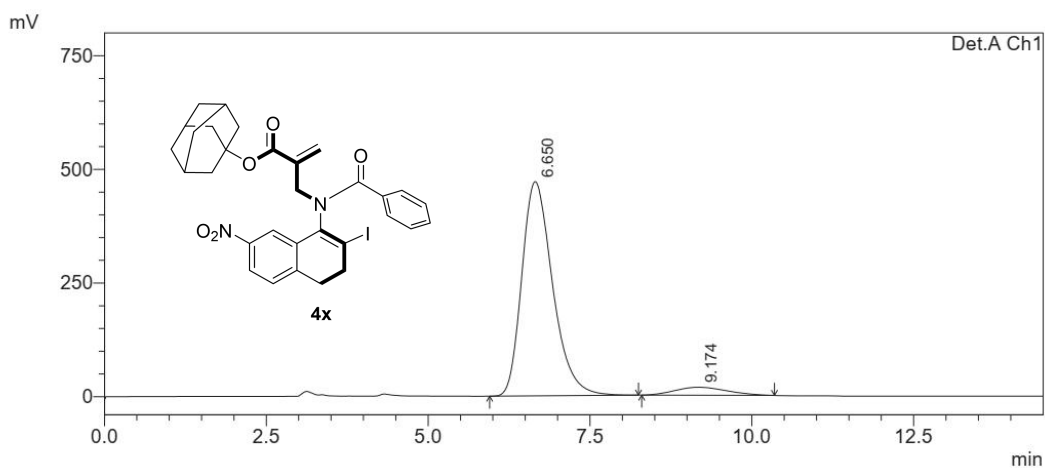

1 Det.A Ch1/210nm

PeakTable

Detector A Ch1 210nm

| Peak# | Ret. Time | Area     | Height | Area %  | Height % |
|-------|-----------|----------|--------|---------|----------|
| 1     | 6.650     | 15594359 | 470834 | 94.097  | 96.400   |
| 2     | 9.174     | 978321   | 17582  | 5.903   | 3.600    |
| Total |           | 16572680 | 488415 | 100.000 | 100.000  |

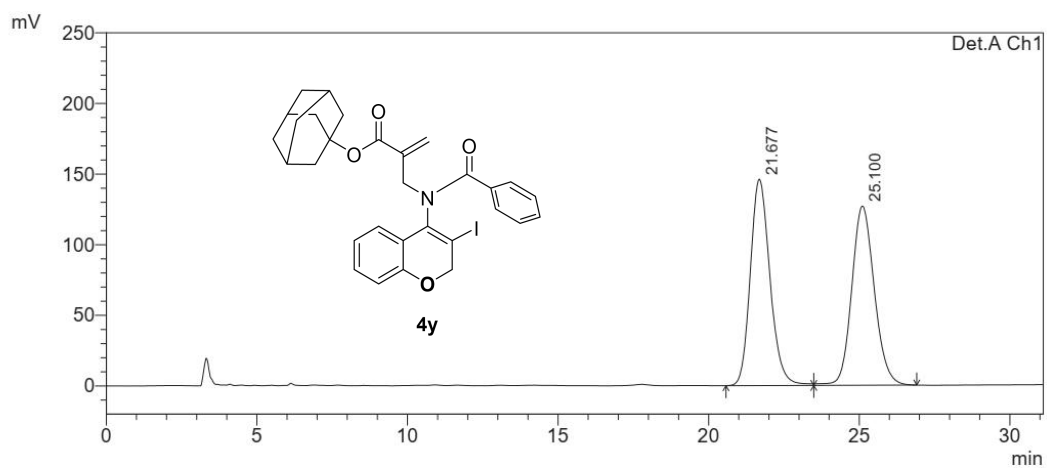

1 Det.A Ch1/210nm

PeakTable

| Peak# | Ret. Time | Area     | Height | Area %  | Height % |
|-------|-----------|----------|--------|---------|----------|
| 1     | 21.677    | 6622152  | 146025 | 50.025  | 53.527   |
| 2     | 25.100    | 6615462  | 126779 | 49.975  | 46.473   |
| Total |           | 13237614 | 272805 | 100.000 | 100.000  |

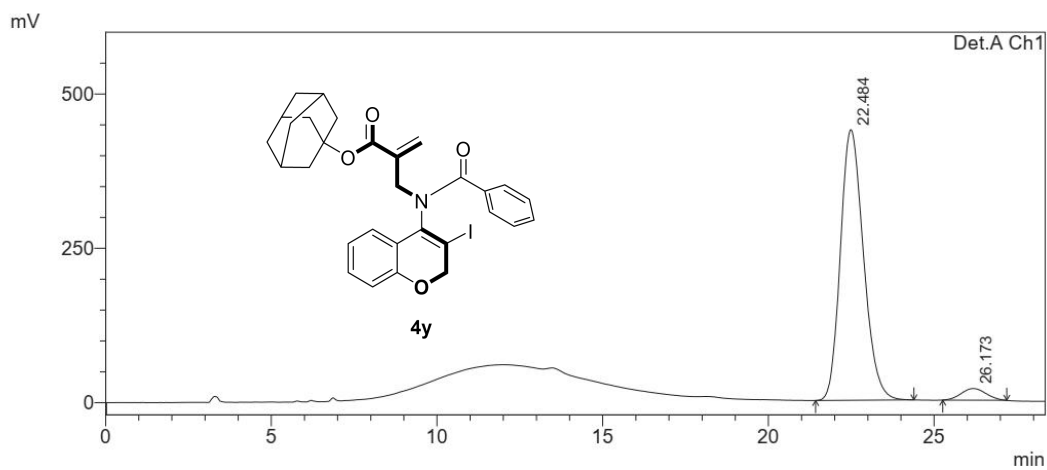

1 Det.A Ch1/210nm

PeakTable

| Peak# | Ret. Time | Area     | Height | Area %  | Height % |
|-------|-----------|----------|--------|---------|----------|
| 1     | 22.484    | 21190385 | 437896 | 95.561  | 95.865   |
| 2     | 26.173    | 984351   | 18888  | 4.439   | 4.135    |
| Total |           | 22174736 | 456784 | 100.000 | 100.000  |

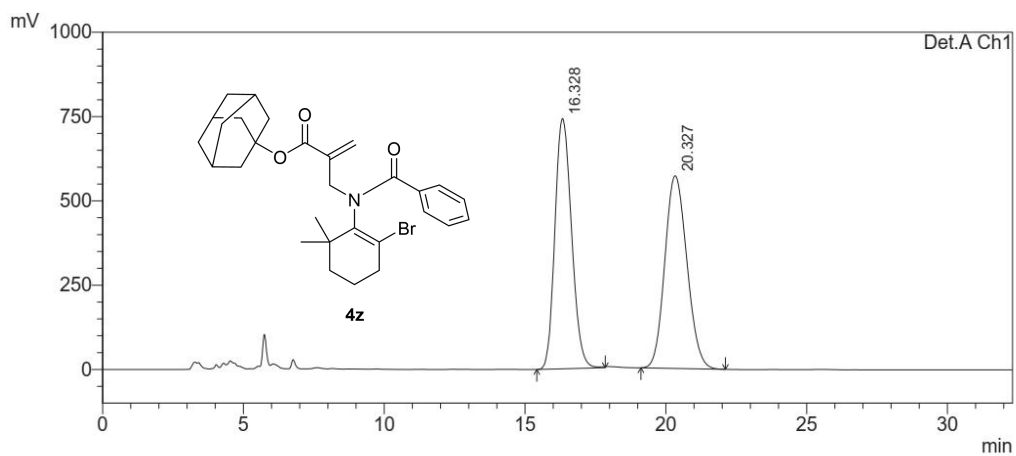

1 Det.A Ch1/210nm

PeakTable

| Peak# | Ret. Time | Area     | Height  | Area %  | Height % |
|-------|-----------|----------|---------|---------|----------|
| 1     | 16.328    | 30540504 | 741847  | 49.476  | 56.572   |
| 2     | 20.327    | 31188013 | 569474  | 50.524  | 43.428   |
| Total |           | 61728517 | 1311322 | 100.000 | 100.000  |

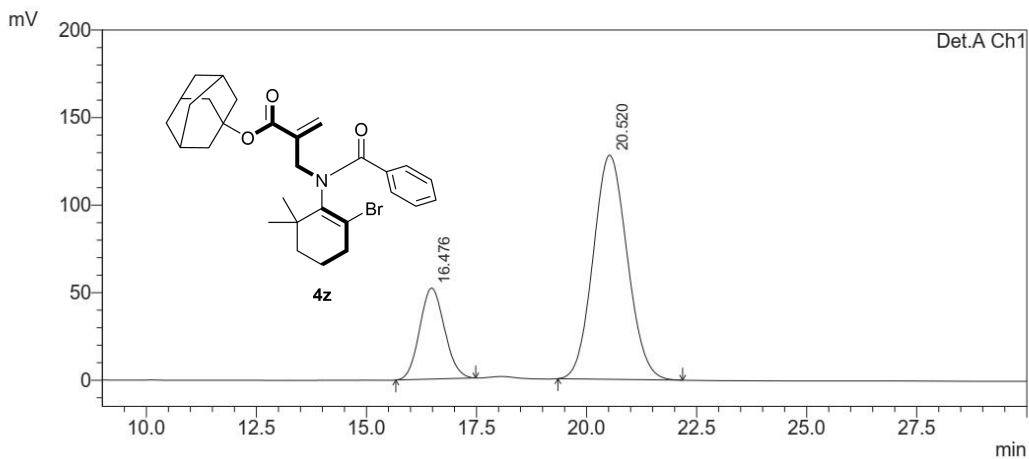

1 Det.A Ch1/210nm

PeakTable

| Peak# | Ret. Time | Area    | Height | Area %  | Height % |
|-------|-----------|---------|--------|---------|----------|
| 1     | 16.476    | 2038588 | 51895  | 22.847  | 28.952   |
| 2     | 20.520    | 6884295 | 127347 | 77.153  | 71.048   |
| Total |           | 8922883 | 179242 | 100.000 | 100.000  |

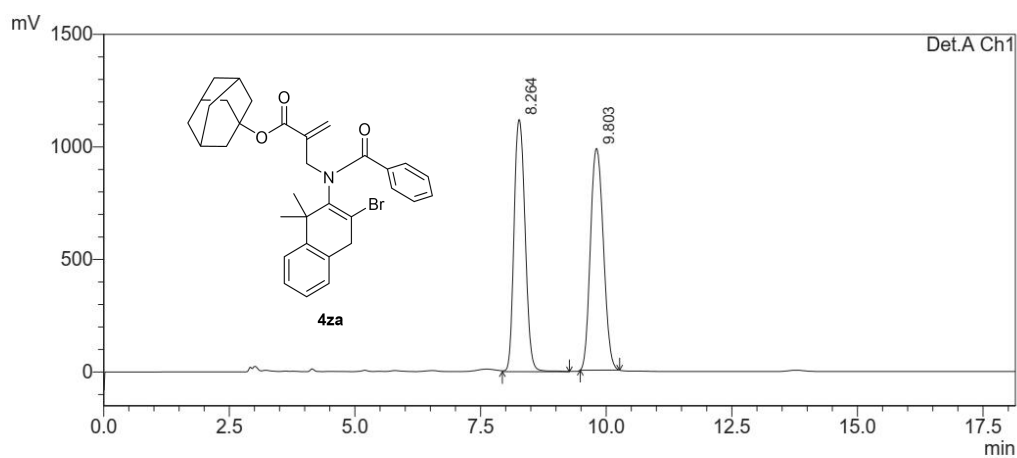

1 Det.A Ch1/210nm

PeakTable

| Peak# | Ret. Time | Area     | Height  | Area %  | Height % |
|-------|-----------|----------|---------|---------|----------|
| 1     | 8.264     | 17212369 | 1118429 | 49.330  | 53.194   |
| 2     | 9.803     | 17679874 | 984132  | 50.670  | 46.806   |
| Total |           | 34892243 | 2102562 | 100.000 | 100.000  |

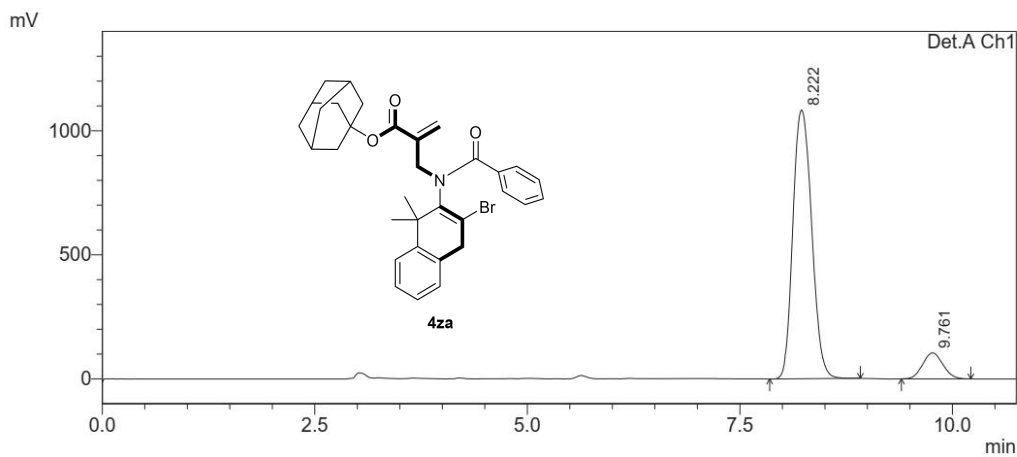

1 Det.A Ch1/210nm

PeakTable

| Peak# | Ret. Time | Area     | Height  | Area %  | Height % |
|-------|-----------|----------|---------|---------|----------|
| 1     | 8.222     | 16663182 | 1081673 | 90.537  | 91.165   |
| 2     | 9.761     | 1741647  | 104828  | 9.463   | 8.835    |
| Total |           | 18404829 | 1186500 | 100.000 | 100.000  |

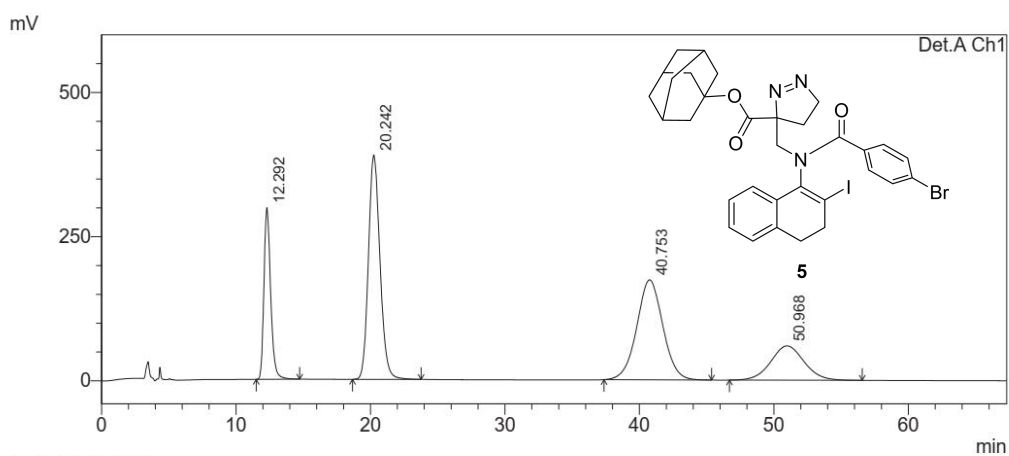

1 Det.A Ch1/210nm

PeakTable

Detector A Ch1 210nm

| Peak# | Ret. Time | Area     | Height | Area %  | Height % |
|-------|-----------|----------|--------|---------|----------|
| 1     | 12.292    | 10341519 | 297187 | 15.383  | 32.398   |
| 2     | 20.242    | 23204199 | 387710 | 34.517  | 42.267   |
| 3     | 40.753    | 23359404 | 173062 | 34.748  | 18.867   |
| 4     | 50.968    | 10319779 | 59330  | 15.351  | 6.468    |
| Total |           | 67224901 | 917289 | 100.000 | 100.000  |

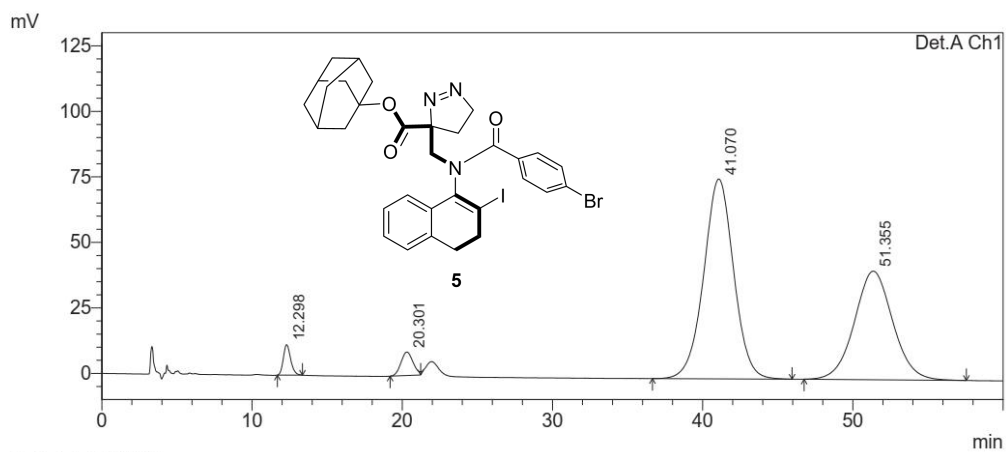

1 Det.A Ch1/210nm

PeakTable

Detector A Ch1 210nm

| Peak# | Ret. Time | Area     | Height | Area %  | Height % |
|-------|-----------|----------|--------|---------|----------|
| 1     | 12.298    | 393332   | 11558  | 2.089   | 8.366    |
| 2     | 20.301    | 501448   | 8961   | 2.664   | 6.486    |
| 3     | 41.070    | 10565538 | 76235  | 56.121  | 55.180   |
| 4     | 51.355    | 7366036  | 41404  | 39.126  | 29.969   |
| Total |           | 18826355 | 138157 | 100.000 | 100.000  |

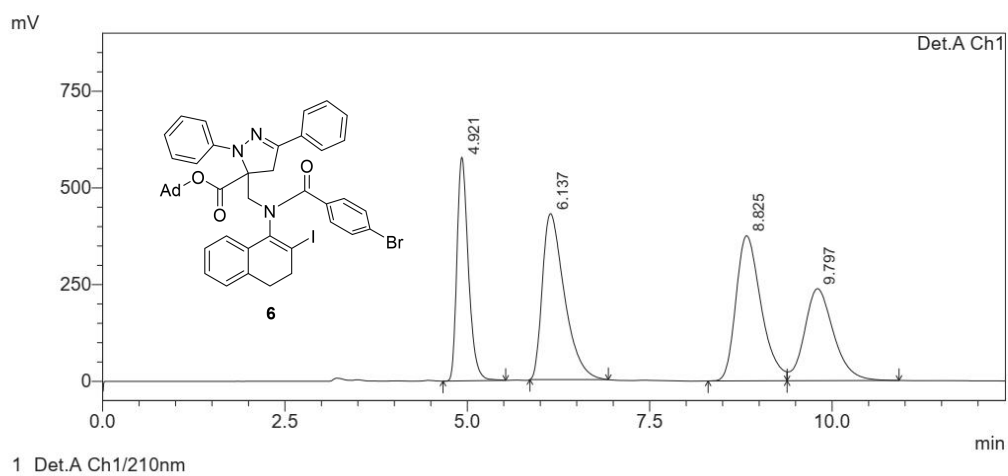

1 Det.A Ch1/210nm

PeakTable

Detector A Ch1 210nm

| Peak# | Ret. Time | Area     | Height  | Area %  | Height % |
|-------|-----------|----------|---------|---------|----------|
| 1     | 4.921     | 6267661  | 578373  | 20.310  | 35.713   |
| 2     | 6.137     | 9014554  | 428464  | 29.211  | 26.457   |
| 3     | 8.825     | 8995717  | 375095  | 29.149  | 23.161   |
| 4     | 9.797     | 6582697  | 237566  | 21.330  | 14.669   |
| Total |           | 30860628 | 1619498 | 100.000 | 100.000  |

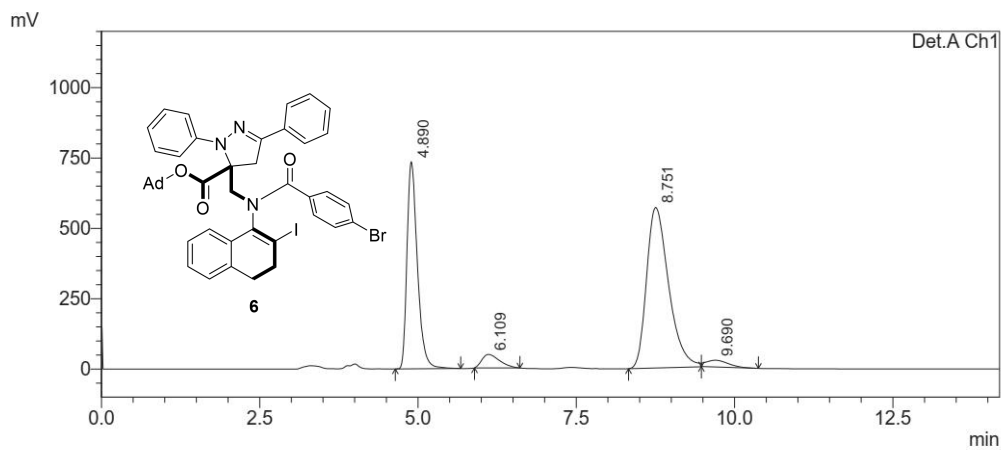

1 Det.A Ch1/210nm

PeakTable

Detector A Ch1 210nm

| Peak# | Ret. Time | Area     | Height  | Area %  | Height % |
|-------|-----------|----------|---------|---------|----------|
| 1     | 4.890     | 8393986  | 731729  | 35.333  | 53.246   |
| 2     | 6.109     | 934401   | 48183   | 3.933   | 3.506    |
| 3     | 8.751     | 13831132 | 570181  | 58.219  | 41.491   |
| 4     | 9.690     | 597460   | 24146   | 2.515   | 1.757    |
| Total |           | 23756979 | 1374239 | 100.000 | 100.000  |

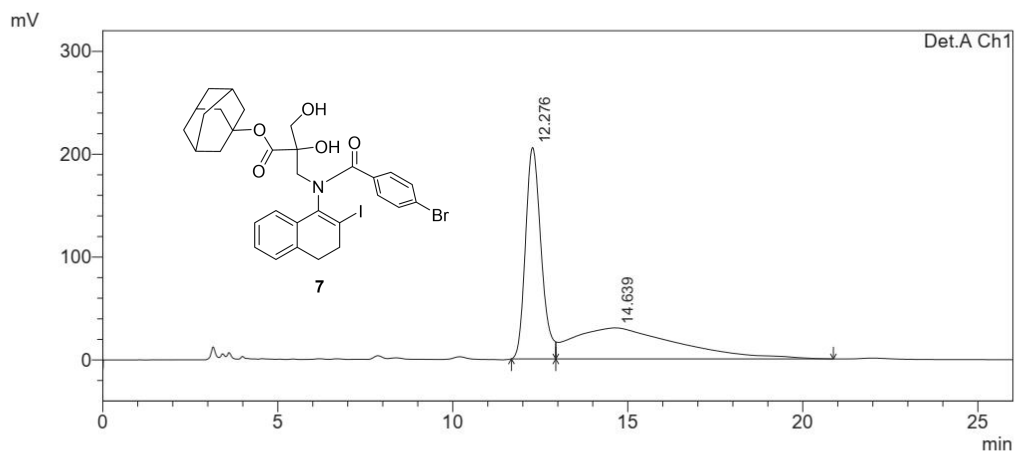

1 Det.A Ch1/210nm

PeakTable

| Peak# | Ret. Time | Area     | Height | Area %  | Height % |
|-------|-----------|----------|--------|---------|----------|
| 1     | 12.276    | 6360512  | 204757 | 50.347  | 87.152   |
| 2     | 14.639    | 6272838  | 30184  | 49.653  | 12.848   |
| Total |           | 12633351 | 234941 | 100.000 | 100.000  |

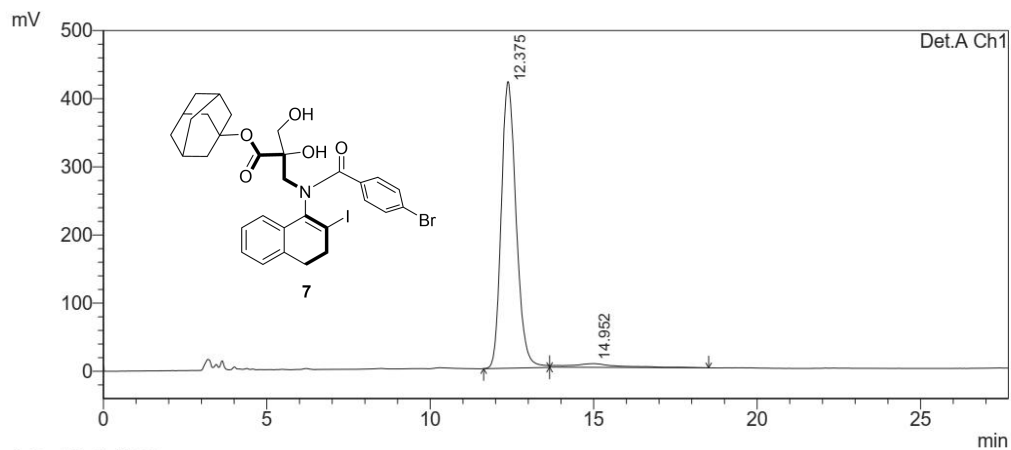

1 Det.A Ch1/210nm

PeakTable

| Peak# | Ret. Time | Area     | Height | Area %  | Height % |
|-------|-----------|----------|--------|---------|----------|
| 1     | 12.375    | 13318827 | 419865 | 95.882  | 98.692   |
| 2     | 14.952    | 572061   | 5563   | 4.118   | 1.308    |
| Total |           | 13890887 | 425428 | 100.000 | 100.000  |

## 9. References

1. J. T. Reeves, Z. Tan, Z. S. Han, G. Li, Y. Zhang, Y. Xu, D. C. Reeves, N. C. Gonnella, S. Ma, H. Lee, B. Z. Lu, C. H. Senanayake, *Angew. Chem. Int. Ed.* **2012**, *51*, 1400-1404.
2. H. Liang, Z.-H. Ren, Y.-Y. Wang, Z.-H. Guan, *Chem. Eur. J.* **2013**, *19*, 9789-9794.
3. G. A. Honorato, R. V. de Lima, B. R. Manda, D. R. Paiva, T. Pimentel, R. da Silva Gomes, *Tetrahedron Letters* **2017**, *58*, 2240-2243.
4. C. Sun, S. M. Weinreb, *Synthesis* **2006**, *21*, 3585-3588.
5. R. J. Phipps, K. Hiramatsu, F. D. Toste, *J. Am. Chem. Soc.* **2012**, *134*, 8376-8379.
6. J. Fang, L. Li, C. Yang, J. Chen, G. J. Deng, H. Gong, *Org. Lett.* **2018**, *20*, 7308-7311.
7. A. Cernijenko, R. Risgaard, P. S. Baran, *J. Am. Chem. Soc.* **2016**, *138*, 9425-9428.
8. H. Zhao, C. P. Vandenbossche, S. G. Koenig, S. P. Singh, R. P. Bakale, *Org. Lett.* **2008**, *10*, 505-507.
9. R. Soni, J.-M. Collinson, G. C. Clarkson, M. Wills, *Org. Lett.* **2011**, *13*, 4304-4307.
10. Y. Hu, W. Shi, B. Zheng, J. Liao, H. Guo, W. Wang, Y. Wu, *Angew. Chem. Int. Ed.* **2020**, *59*, 19820-19824.
11. H.-f. Lu, J. Xie, Z.-b. Luo, C. Zhao, *Synthesis* **2016**, *48*, 3696-3700.
